# Supplementary material for: Synthesis and aggregation behaviour of single-chain, 1,32-alkyl-branched bis(phosphocholines) – part 2: lateral chain length triggers self-assembling from sheets to fibres to vesicles
Source: Royal Society of Chemistry journal article supplement (doi:10.1039/d0ob00534g), 2020-01-01
Supplement: d0ob00534g1.pdf [file d0ob00534g1.pdf]

## Organic & Biomolecular Chemistry

### Electronic Supplementary Information (ESI)

---

#### *Synthesis and aggregation behaviour of single-chain, 1,32-alkyl-branched bis(phosphocholines) – Part 2: lateral chain length triggers self-assembling from sheets to fibres to vesicles*

*Kai Gruhle,<sup>a</sup> Max Tuchtenhagen,<sup>a</sup> Sindy Müller,<sup>a</sup> Gerd Hause,<sup>b</sup> Annette Meister,<sup>c</sup> and Simon Drescher <sup>\*a,d</sup>*

<sup>a</sup> *Institute of Pharmacy – Biophysical Pharmacy, Martin Luther University (MLU) Halle-Wittenberg, Wolfgang-Langenbeck-Strasse 4, 01620 Halle (Saale), Germany.*

*E-mail: simon.drescher@pharmazie.uni-halle.de*

<sup>b</sup> *Biocenter, MLU Halle-Wittenberg, Weinbergweg 22, 06120 Halle (Saale), Germany.*

<sup>c</sup> *ZIK HALOmem and Institute of Biochemistry and Biotechnology, Carles Tanford Protein Center, MLU Halle-Wittenberg, Kurt-Mother-Strasse 3a, 06120 Halle (Saale), Germany.*

<sup>d</sup> *Phospholipid Research Center, Im Neuenheimer Feld 515, 69120 Heidelberg, Germany.*

*E-mail: sdrescher@phospholipid-institute.com*

---

#### Content:

|                                                                                            |          |
|--------------------------------------------------------------------------------------------|----------|
| 1. Synthetic aspects .....                                                                 | 2        |
| 2. DSC measurements .....                                                                  | 3 – 4    |
| 3. TEM .....                                                                               | 5        |
| 4. Synthesis of compounds 3a-c, 4a-f, 5a-f, and 10a-f .....                                | 6 – 12   |
| 5. Characterisation of products: MS, <sup>1</sup> H NMR, <sup>13</sup> C NMR spectra ..... | 13 – 126 |
| 6. References .....                                                                        | 127      |

# Organic & Biomolecular Chemistry

## 1. Synthetic aspects

**Table S1.** Reagents and conditions for the selective Grignard mono-coupling reactions performed in this work.<sup>a</sup>

| Entry | Lateral alkyl chain | Educt 1 (Grignard reagent) | Yield <sup>b</sup> (%) of Grignard reagent | Educt 2 (coupling reagent) | Ratio Ed1 : Ed2 | Cat. (1/60 mol%) <sup>c</sup>     | Temp. of coupling reaction <sup>d</sup> | Product   | Yield <sup>e</sup> (%) |
|-------|---------------------|----------------------------|--------------------------------------------|----------------------------|-----------------|-----------------------------------|-----------------------------------------|-----------|------------------------|
| 1     | <i>n</i> -C8        | <b>6a</b> (39.48 mmol)     | >98                                        | <b>6</b> (37.60 mmol)      | 1.05 : 1        | Li <sub>2</sub> CuCl <sub>4</sub> | -70 °C → r.t.                           | <b>8a</b> | 78                     |
| 2     | <i>n</i> -C12       | <b>6b</b> (22.50 mmol)     | >98                                        | <b>6</b> (25.17 mmol)      | 1 : 1.12        | Li <sub>2</sub> CuCl <sub>4</sub> | -70 °C → r.t.                           | <b>8b</b> | 76                     |
| 3     | <i>n</i> -C15       | <b>6c</b> (34.33 mmol)     | 94                                         | <b>6</b> (37.76 mmol)      | 1 : 1.10        | Li <sub>2</sub> CuCl <sub>4</sub> | -70 °C → r.t.                           | <b>8c</b> | 77                     |

<sup>a</sup> All reactions were performed in THF.

<sup>b</sup> Yields determined by weighing the Mg left after Grignard formation.

<sup>c</sup> 1/60 mol% of Cu-catalyst with respect to the molar amount of Grignard reactions.

<sup>d</sup> The formation of the Grignard reagent (RMgBr) was carried out at 50 °C, whereas the subsequently performed coupling reaction was done at the temperature mentioned in the table (r.t. = room temperature).

<sup>e</sup> Isolated yields after chromatography.

2. DSC measurements

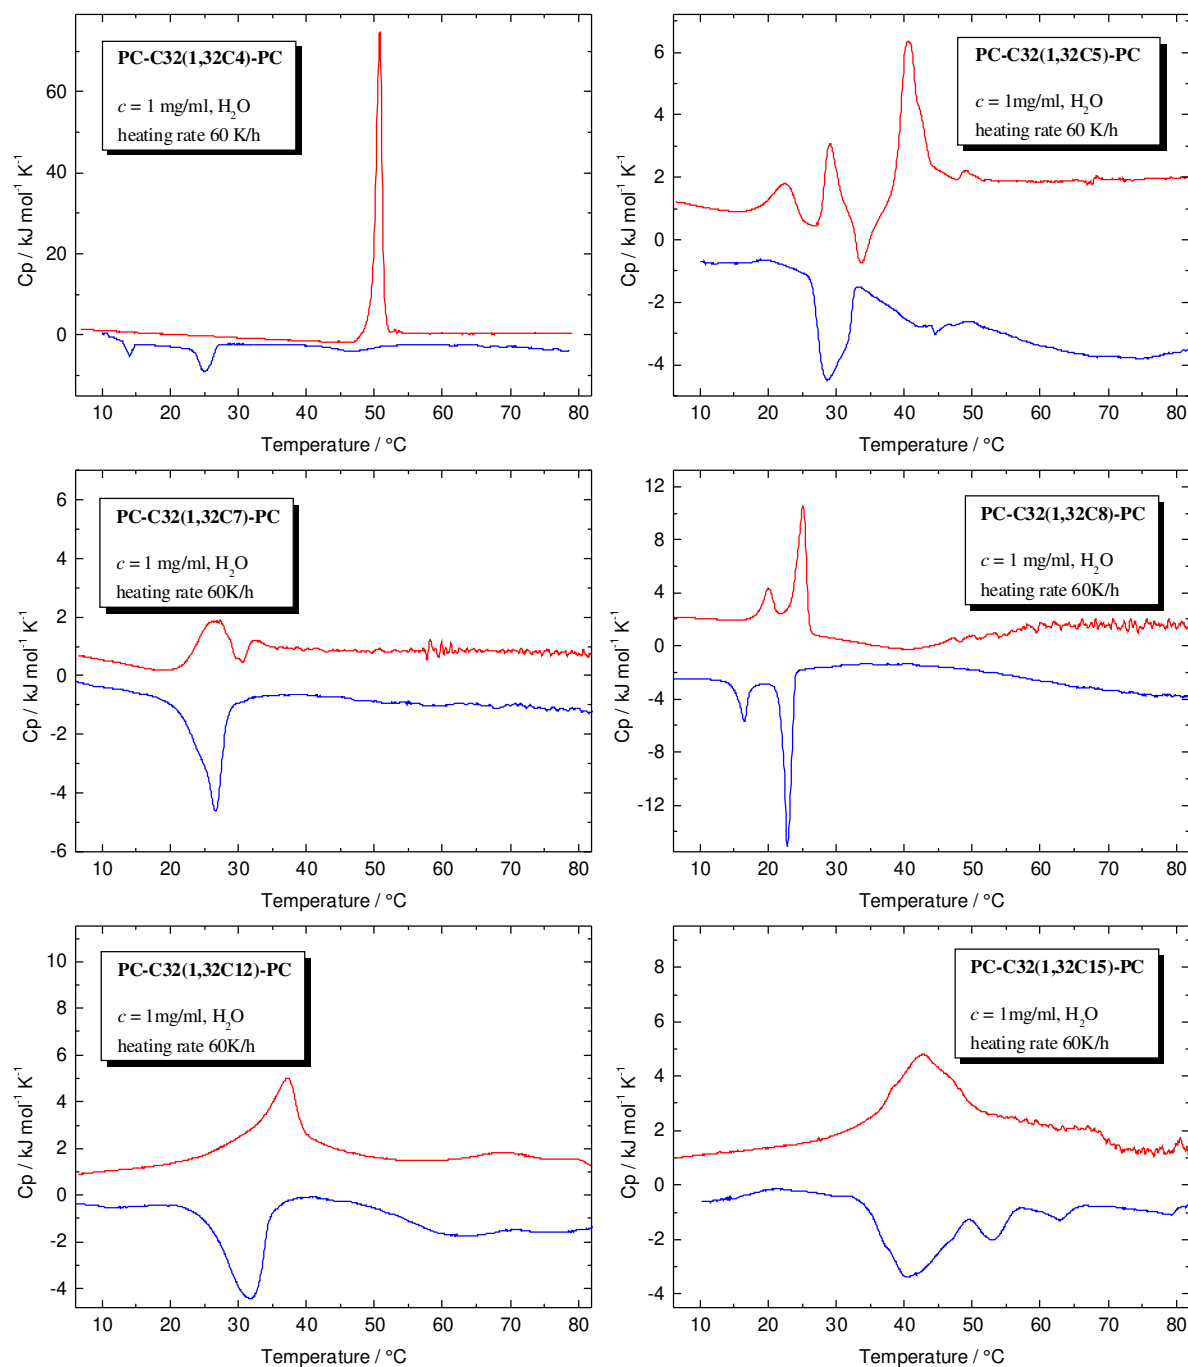

**Figure S1.** DSC heating (red lines) and cooling (blue lines) curves of aqueous suspensions of bolalipids **PC-C32(1,32C $m$ )-PC** with  $m = 4$  (top left), 5 (top right), 7 (middle left), 8 (middle right), 12 (bottom left), and 15 (bottom right).

## Organic & Biomolecular Chemistry

**Table S2.** Data taken from DSC measurements of aqueous suspensions of **PC-C32(1,32Cm)-PC**. Data for  $m = 3, 6,$  and  $9,$  respectively, are shown for comparison.<sup>1</sup> Data analysis was performed using Origin 8.0 software.

| Bolalipid  | Peak | Enthalpy<br>( $\Delta H / \text{kJ mol}^{-1}$ ) | Transition ( $^{\circ}\text{C}$ ) |      |         | FWHM<br>(K) | Left half<br>width (K) | Right half<br>width (K) |
|------------|------|-------------------------------------------------|-----------------------------------|------|---------|-------------|------------------------|-------------------------|
|            |      |                                                 | Begin                             | End  | Maximum |             |                        |                         |
| <b>C3</b>  | 1    | 94.6                                            | 57.4                              | 67.2 | 63.8    | 0.6         | 0.4                    | 0.2                     |
| <b>C4</b>  | 1    | 89.5                                            | 47.2                              | 52.3 | 50.8    | 1.0         | 0.6                    | 0.4                     |
| <b>C5</b>  | 1    | 5.0                                             | 14.9                              | 25.5 | 22.5    | 4.1         | 2.5                    | 1.6                     |
|            | 2    | 4.7                                             | 27.3                              | 31.5 | 29.0    | 2.0         | 0.8                    | 1.2                     |
|            | 3    | -7.4                                            | 31.5                              | 38.5 | 33.8    | 3.3         | 1.1                    | 2.2                     |
|            | 4    | 13.7                                            | 38.5                              | 47.3 | 40.6    | 2.8         | 1.1                    | 1.7                     |
| <b>C6</b>  | 1    | 44.8                                            | 16.2                              | 22.9 | 20.7    | 1.0         | 0.6                    | 0.4                     |
| <b>C7</b>  | 1    | 7.5                                             | 20.9                              | 30.4 | 27.4    | 5.1         | 3.6                    | 1.5                     |
|            | 2    | 1.5                                             | 30.8                              | 35.6 | 32.3    | 2.6         | 1.0                    | 1.6                     |
| <b>C8</b>  | 1    | 7.0                                             | 15.7                              | 21.8 | 20.1    | 2.1         | 1.1                    | 1.0                     |
|            | 2    | 17.5                                            | 21.8                              | 26.6 | 25.1    | 1.5         | 1.0                    | 0.5                     |
| <b>C9</b>  | 1    | 27.2                                            | 16.7                              | 23.3 | 20.6    | 2.0         | 0.9                    | 1.1                     |
| <b>C12</b> | 1    | 27.3                                            | 22.8                              | 51.9 | 37.2    | 4.8         | 3.4                    | 1.4                     |
|            | 2    | 1.6                                             | 63.7                              | 73.8 | 68.9    | 5.9         | 3.0                    | 2.9                     |
| <b>C15</b> | 1    | 24.5                                            | 30.5                              | 52.8 | 42.7    | 9.8         | 4.9                    | 4.9                     |
|            | 2    | 2.4                                             | 62.8                              | 71.3 | 67.9    | 3.8         | 2.7                    | 1.1                     |

FWHM = full width at half maximum

3. TEM

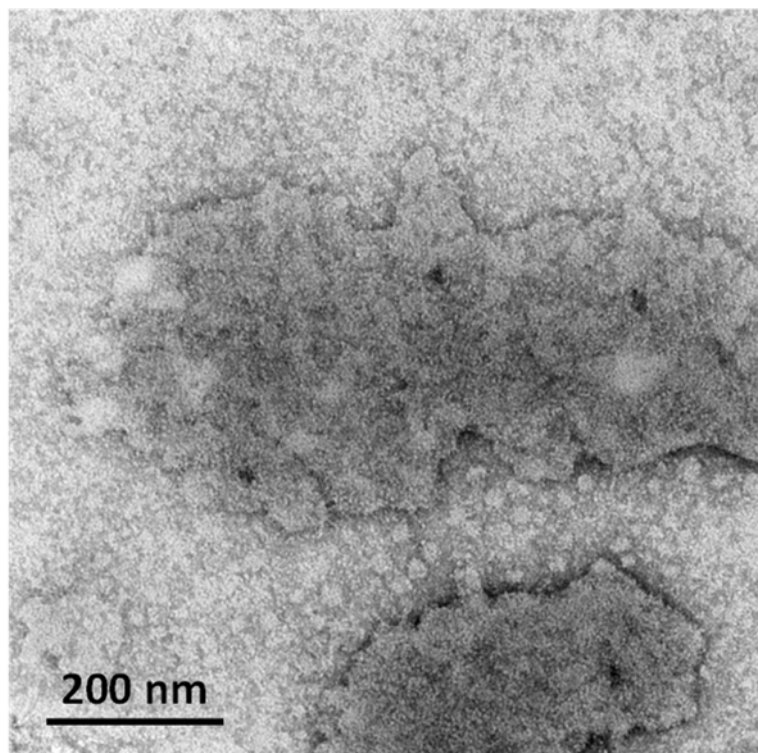

**Figure S2.** TEM image of an aqueous suspension of **PC-C32(1,32C7)-PC** ( $c = 0.05 \text{ mg mL}^{-1}$ ). Sample was prepared at  $T = 22^\circ\text{C}$  and stained with uranyl acetate before drying.

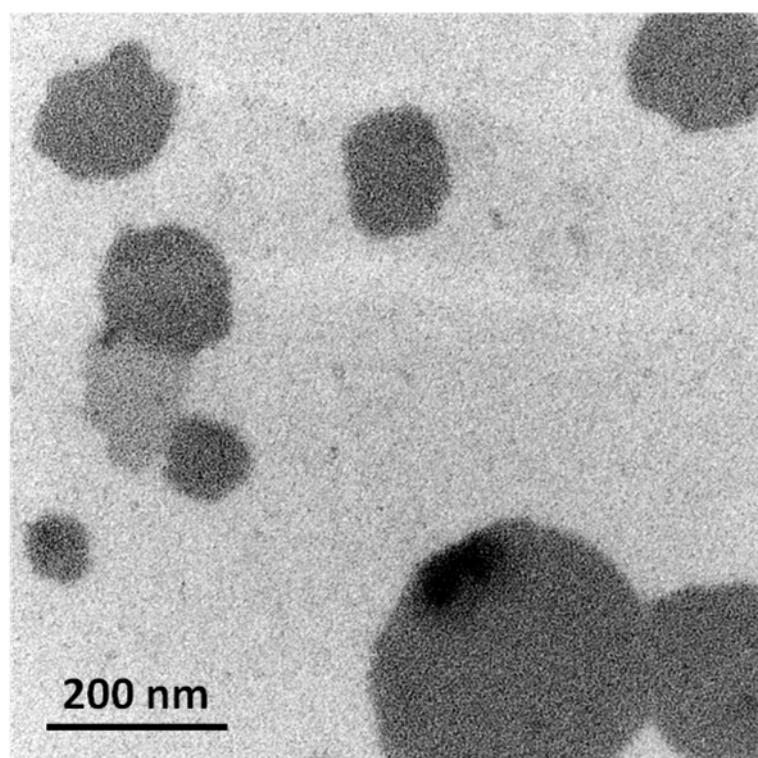

**Figure S3.** TEM image of an aqueous suspension of **PC-C32(1,32C8)-PC** ( $c = 0.05 \text{ mg mL}^{-1}$ ). Samples was prepared at about  $50^\circ\text{C}$  and stained with uranyl acetate before drying.

## Organic & Biomolecular Chemistry

### 4. Synthesis of compounds 3a-c, 4a-f, 5a-f, and 10a-f

**General procedure for the synthesis of alkane-1,5-diols 3.** For the reduction of the lactones, lithium aluminium hydride (1.1 equiv.) was suspended in dry diethyl ether (200 mL) in a 1 L-round-bottomed flask under argon atmosphere. The suspension was cooled to  $-10\text{ }^{\circ}\text{C}$  and stirred for 1 h. The corresponding lactone **2** (1 equiv.), dissolved in dry Et<sub>2</sub>O (50 mL), was added slowly. The ice bath was removed, and the mixture was stirred for 20 h at room temperature. Afterwards, the reaction mixture was hydrolysed with ice and acidified using sulphuric acid (30%, 40 mL). The layers were separated, and the aqueous phase was extracted three times with diethyl ether (200 mL). The combined ethereal phases were washed with brine (300 mL), dried over sodium sulphate, and evaporated. The crude product was purified by column chromatography with the use of heptane/chloroform (2/8, v/v) as eluent yielding the diol **3** as a white solid or colourless oil.

**(5RS)-Nonane-1,5-diol (3a).**<sup>2</sup> Following the general procedure, **2a** (12.50 g, 80.02 mmol) and lithium aluminium hydride (3.35 g, 88.02 mmol) gave **3a** (11.17 g, 87%) as colourless oil. <sup>1</sup>H NMR (400 MHz, CDCl<sub>3</sub>, 27 °C)  $\delta$  0.88 (t,  $J$  = 6.4 Hz, 3 H, CH<sub>3</sub>), 1.19–1.65 (m, 12 H, CH<sub>2</sub>), 2.33 (s, 2 H, 2 × OH), 3.51–3.65 (m, 3 H, CHOH, CH<sub>2</sub>OH); <sup>13</sup>C NMR (100 MHz, CDCl<sub>3</sub>, 27 °C)  $\delta$  14.03 (CH<sub>3</sub>), 21.77 (CH<sub>2</sub>(CH<sub>2</sub>)<sub>2</sub>OH), 22.72 (CH<sub>3</sub>CH<sub>2</sub>), 27.83 (CH<sub>3</sub>CH<sub>2</sub>CH<sub>2</sub>), 32.53 (CH<sub>2</sub>CH<sub>2</sub>OH), 36.91 (CH<sub>2</sub>(CH<sub>2</sub>)<sub>3</sub>OH), 37.21 (CH<sub>3</sub>(CH<sub>2</sub>)<sub>2</sub>CH<sub>2</sub>), 62.61 (CH<sub>2</sub>OH), 71.77 (CHOH); ESI-MS  $m/z$  183.48 (M + Na). Analytical data are in accordance with data published previously.<sup>2</sup>

**(5RS)-Decane-1,5-diol (3b).**<sup>2</sup> Following the general procedure, **2b** (12.20 g, 71.66 mmol) and lithium aluminium hydride (3.12 g, 82.11 mmol) gave **3b** (11.39 g, 92%) as a colourless oil. <sup>1</sup>H NMR (500 MHz, CDCl<sub>3</sub>, 27 °C)  $\delta$  0.85–0.93 (m, 3 H, CH<sub>3</sub>), 1.23–1.67 (m, 14 H, CH<sub>2</sub>), 3.57–3.64 (m, 1 H, CHOH), 3.66 (t,  $J$  = 6.4 Hz, 2 H, CH<sub>2</sub>OH); <sup>13</sup>C NMR (125 MHz, CDCl<sub>3</sub>, 27 °C)  $\delta$  14.01 (CH<sub>3</sub>), 21.81 (CH<sub>2</sub>(CH<sub>2</sub>)<sub>2</sub>OH), 22.61 (CH<sub>3</sub>CH<sub>2</sub>), 25.31 (CH<sub>3</sub>(CH<sub>2</sub>)<sub>2</sub>CH<sub>2</sub>), 31.86 and 32.60 (CH<sub>3</sub>CH<sub>2</sub>CH<sub>2</sub> and CH<sub>2</sub>CH<sub>2</sub>OH), 37.00 and 37.50 (CH<sub>2</sub>(CHOH)CH<sub>2</sub>), 62.81 (CH<sub>2</sub>OH), 71.88 (CHOH); APCI-MS  $m/z$  157.1 (M – H<sub>2</sub>O + H), 175.1 (M + H). Analytical data are in accordance with data published previously.<sup>2</sup>

**(5RS)-Dodecane-1,12-diol (3c).**<sup>2</sup> Following the general procedure, **2c** (15.70 g, 79.17 mmol) and lithium aluminium hydride (3.40 g, 89.47 mmol) gave **3c** (14.40 g, 90%) as a white solid. M.p. 36–38 °C; <sup>1</sup>H NMR (500 MHz, CDCl<sub>3</sub>, 27 °C)  $\delta$  0.85–0.91 (m, 3 H, CH<sub>3</sub>), 1.20–1.66 (m, 18 H, CH<sub>2</sub>), 3.58–3.63 (m, 1 H, CHOH), 3.66 (t,  $J$  = 6.4 Hz, 2 H, CH<sub>2</sub>OH); <sup>13</sup>C NMR (125 MHz, CDCl<sub>3</sub>, 27 °C)  $\delta$  14.06 (CH<sub>3</sub>), 21.82 (CH<sub>2</sub>(CH<sub>2</sub>)<sub>2</sub>OH), 22.63 (CH<sub>3</sub>CH<sub>2</sub>), 25.64 (CH<sub>3</sub>(CH<sub>2</sub>)<sub>4</sub>CH<sub>2</sub>), 29.26 and 29.63 (CH<sub>3</sub>(CH<sub>2</sub>)<sub>2</sub>CH<sub>2</sub>CH<sub>2</sub>), 31.80 (CH<sub>3</sub>CH<sub>2</sub>CH<sub>2</sub>), 32.65 (CH<sub>2</sub>CH<sub>2</sub>OH), 37.03 and 37.54 (CH<sub>2</sub>(CHOH)CH<sub>2</sub>), 62.85 (CH<sub>2</sub>OH), 71.88 (CHOH); APCI-MS  $m/z$  185.2 (M – H<sub>2</sub>O + H), 203.2 (M + H). Analytical data are in accordance with data described previously.<sup>2</sup>

## Organic & Biomolecular Chemistry

**General procedure for the synthesis of bromoalkanols 4a-c via Appel-reaction.** The diol **3** (1 equiv.) was placed in a 250 mL-round-bottomed flask and dry  $\text{CH}_2\text{Cl}_2$  (150 mL) was added and cooled to  $10^\circ\text{C}$ . Triphenylphosphane (1.1 equiv.) and tetrabromomethane (1.1 equiv.) were added in one portion and the colourless solution was stirred for 20 h at  $10^\circ\text{C}$ . Afterwards, silica gel (amount of the total weight) was added and the solvent was evaporated. The adsorbed crude product was purified by column chromatography using heptane/diethyl ether (8/2, v/v) as eluent.

**(5RS)-1-Bromononan-5-ol (4a).** Following the general procedure, **3a** (11.17 g, 69.70 mmol), triphenylphosphane (20.11 g, 76.67 mmol) and tetrabromomethane (25.43 g, 76.67 mmol) gave **4a** as colourless oil (8.16 g, 53%).  $^1\text{H}$  NMR (400 MHz,  $\text{CDCl}_3$ ,  $27^\circ\text{C}$ )  $\delta$  0.62–0.94 (m, 3 H,  $\text{CH}_3$ ), 1.10–1.69 (m, 10 H,  $\text{CH}_2$ ), 1.74–2.02 (m, 2 H,  $\text{CH}_2\text{CH}_2\text{Br}$ ), 3.29–3.43 (m, 2 H,  $\text{CH}_2\text{Br}$ ), 3.51–3.62 (m, 1 H,  $\text{CH}$ );  $^{13}\text{C}$  NMR (100 MHz,  $\text{CDCl}_3$ ,  $27^\circ\text{C}$ )  $\delta$  14.03 ( $\text{CH}_3$ ), 22.70 ( $\text{CH}_2\text{CH}_3$ ), 24.30 ( $\text{CH}_2(\text{CH}_2)_2\text{Br}$ ), 27.78 ( $\text{CH}_2\text{CH}_2\text{CH}_3$ ), 32.76 ( $\text{CH}_2\text{CH}_2\text{Br}$ ), 33.71 ( $\text{CH}_2\text{Br}$ ), 36.40 and 37.17 ( $\text{CH}_2(\text{CHOH})\text{CH}_2$ ), 71.72 ( $\text{CH}$ ); APCI-MS  $m/z$  205.0 ( $\text{M} - \text{H}_2\text{O} + \text{H}$ ,  $^{79}\text{Br}$  isotope), 207.0 ( $\text{M} - \text{H}_2\text{O} + \text{H}$ ,  $^{81}\text{Br}$  isotope).

**(5RS)-1-Bromodecan-5-ol (4b).** Following the general procedure, **3b** (11.39 g, 65.36 mmol), triphenylphosphane (18.87 g, 71.89 mmol) and tetrabromomethane (23.87 g, 71.89 mmol) gave **4b** (9.97 g, 65%) as colourless oil.  $^1\text{H}$  NMR (400 MHz,  $\text{CDCl}_3$ ,  $27^\circ\text{C}$ )  $\delta$  0.82–0.93 (m, 3 H,  $\text{CH}_3$ ), 1.21–1.68 (m, 12 H,  $\text{CH}_2$ ), 1.80–1.97 (m, 2 H,  $\text{CH}_2\text{CH}_2\text{Br}$ ), 3.42 (t,  $J = 6.8$  Hz, 2 H,  $\text{CH}_2\text{Br}$ ), 3.55–3.65 (m, 1 H,  $\text{CH}$ );  $^{13}\text{C}$  NMR (100 MHz,  $\text{CDCl}_3$ ,  $27^\circ\text{C}$ )  $\delta$  14.01 ( $\text{CH}_3$ ), 22.61 ( $\text{CH}_2\text{CH}_3$ ), 24.31 ( $\text{CH}_2(\text{CH}_2)_2\text{Br}$ ), 25.28 ( $\text{CH}_2(\text{CH}_2)_2\text{CH}_3$ ), 31.84 ( $\text{CH}_2\text{CH}_2\text{CH}_3$ ), 32.77 ( $\text{CH}_2\text{CH}_2\text{Br}$ ), 33.71 ( $\text{CH}_2\text{Br}$ ), 36.43 ( $\text{CH}_2(\text{CH}_2)_3\text{CH}_3$ ), 37.49 ( $\text{CH}_2(\text{CH}_2)_3\text{Br}$ ), 71.70 ( $\text{CH}$ ); APCI-MS  $m/z$  219.1 ( $\text{M} - \text{H}_2\text{O} + \text{H}$ ,  $^{79}\text{Br}$  isotope), 221.1 ( $\text{M} - \text{H}_2\text{O} + \text{H}$ ,  $^{81}\text{Br}$  isotope).

**(5RS)-1-Bromododecan-5-ol (4c).** Following the general procedure, **3c** (14.40 g, 71.17 mmol), triphenylphosphane (20.55 g, 78.29 mmol) and tetrabromomethane (26.94 g, 78.29 mmol) gave **4c** (10.87 g, 58%) as colourless oil.  $\text{C}_{12}\text{H}_{25}\text{BrO}$  requires C, 54.34; H, 9.50; found: C, 53.94; H, 9.02;  $^1\text{H}$  NMR (400 MHz,  $\text{CDCl}_3$ ,  $27^\circ\text{C}$ )  $\delta$  0.82–0.92 (m, 3 H,  $\text{CH}_3$ ), 1.20–1.67 (m, 16 H,  $\text{CH}_2$ ), 1.80–1.97 (m, 2 H,  $\text{CH}_2\text{CH}_2\text{Br}$ ), 3.42 (t,  $J = 6.8$  Hz, 2 H,  $\text{CH}_2\text{Br}$ ), 3.55–3.65 (m, 1 H,  $\text{CH}$ );  $^{13}\text{C}$  NMR (100 MHz,  $\text{CDCl}_3$ ,  $27^\circ\text{C}$ )  $\delta$  14.01 ( $\text{CH}_3$ ), 22.62 ( $\text{CH}_2\text{CH}_3$ ), 24.31 ( $\text{CH}_2(\text{CH}_2)_2\text{Br}$ ), 25.61 ( $\text{CH}_2(\text{CH}_2)_4\text{CH}_3$ ), 29.25 ( $\text{CH}_2(\text{CH}_2)_2\text{CH}_3$ ), 29.61 ( $\text{CH}_2(\text{CH}_2)_3\text{CH}_3$ ), 31.79 ( $\text{CH}_2\text{CH}_2\text{CH}_3$ ), 32.77 ( $\text{CH}_2\text{CH}_2\text{Br}$ ), 33.71 ( $\text{CH}_2\text{Br}$ ), 36.41 ( $\text{CH}_2(\text{CH}_2)_5\text{CH}_3$ ), 37.51 ( $\text{CH}_2(\text{CH}_2)_3\text{Br}$ ), 71.73 ( $\text{CH}$ ); APCI-MS  $m/z$  247.2 ( $\text{M} - \text{H}_2\text{O} + \text{H}$ ,  $^{79}\text{Br}$  isotope), 249.2 ( $\text{M} - \text{H}_2\text{O} + \text{H}$ ,  $^{81}\text{Br}$  isotope).

## Organic & Biomolecular Chemistry

**General procedure for the synthesis of 1-bromoalkan-5-ols 4d-f via reduction.** For the reduction of the bromoketones **8**, lithium aluminium hydride (0.4 equiv.) was suspended in dry diethyl ether (100 mL) in a 500 mL-round-bottomed flask under argon atmosphere. The suspension was cooled to  $-10\text{ }^{\circ}\text{C}$  and stirred for 1 h. The corresponding bromoketone **8** (1 equiv.), dissolved in dry diethyl ether (150 mL), was added slowly. The mixture was stirred for 20 h at  $-10\text{ }^{\circ}\text{C}$ . Afterwards, the reaction mixture was hydrolysed with ice and acidified using sulphuric acid (30%, 40 mL). The layers were separated, and the aqueous phase was extracted three times with diethyl ether (200 mL). The combined ethereal phases were washed with brine (300 mL), dried over sodium sulphate and evaporated. The crude product was purified by column chromatography with the use of heptane/diethyl ether (92/8, v/v) as eluent yielding the bromoalkanols **4d-f** as a white solid or colourless oil.

**(5RS)-1-Bromotridecan-5-ol (4d).** Following the general procedure, **8a** (8.10 g, 29.22 mmol) and lithium aluminium hydride (0.47 g, 12.37 mmol) gave **4d** (4.57 g, 57%) as a colourless oil.  $^1\text{H}$  NMR (500 MHz,  $\text{CDCl}_3$ ,  $27\text{ }^{\circ}\text{C}$ )  $\delta$  0.88 (t,  $J = 6.9\text{ Hz}$ , 3 H,  $\text{CH}_3$ ), 1.21–1.71 (m, 18 H,  $\text{CH}_2$ ), 1.81–1.95 (m, 2 H,  $\text{CH}_2\text{CH}_2\text{Br}$ ), 3.41 (t,  $J = 6.8\text{ Hz}$ , 2 H,  $\text{CH}_2\text{Br}$ ), 3.55–3.64 (m, 1 H,  $\text{CH}$ );  $^{13}\text{C}$  NMR (125 MHz,  $\text{CDCl}_3$ ,  $27\text{ }^{\circ}\text{C}$ )  $\delta$  14.07 ( $\text{CH}_3$ ), 22.64 ( $\text{CH}_2\text{CH}_3$ ), 24.31 ( $\text{CH}_2(\text{CH}_2)_2\text{Br}$ ), 25.61 ( $\text{CH}_2(\text{CH}_2)_5\text{CH}_3$ ), 29.24, 29.55 and 29.65 ( $\text{CH}_2$ ), 31.85 ( $\text{CH}_2\text{CH}_2\text{CH}_3$ ), 32.77 ( $\text{CH}_2\text{CH}_2\text{Br}$ ), 33.70 ( $\text{CH}_2\text{Br}$ ), 36.43 ( $\text{CH}_2(\text{CH}_2)_6\text{CH}_3$ ), 37.53 ( $\text{CH}_2(\text{CH}_2)_3\text{Br}$ ), 71.69 ( $\text{CH}$ ); APCI-MS  $m/z$  261.1 ( $\text{M} - \text{H}_2\text{O} + \text{H}$ ,  $^{79}\text{Br}$  isotope), 263.1 ( $\text{M} - \text{H}_2\text{O} + \text{H}$ ,  $^{81}\text{Br}$  isotope).

**(5RS)-1-Bromoheptadecan-5-ol (4e).** Following the general procedure, **8b** (5.69 g, 17.07 mmol) and lithium aluminium hydride (0.26 g, 6.83 mmol) gave **4e** (4.59 g, 81%) as white solid. M.p.  $45\text{--}46\text{ }^{\circ}\text{C}$ ;  $\text{C}_{17}\text{H}_{35}\text{BrO}$  requires C, 60.88; H, 10.52; found: C, 60.95; H, 10.42;  $^1\text{H}$  NMR (400 MHz,  $\text{CDCl}_3$ ,  $27\text{ }^{\circ}\text{C}$ )  $\delta$  0.84–0.92 (m, 3 H,  $\text{CH}_3$ ), 1.23–1.67 (m, 26 H,  $\text{CH}_2$ ), 1.82–1.95 (m, 2 H,  $\text{CH}_2\text{CH}_2\text{Br}$ ), 3.42 (t,  $J = 6.8\text{ Hz}$ , 2 H,  $\text{CH}_2\text{Br}$ ), 3.56–3.65 (m, 1 H,  $\text{CH}$ );  $^{13}\text{C}$  NMR (100 MHz,  $\text{CDCl}_3$ ,  $27\text{ }^{\circ}\text{C}$ )  $\delta$  14.09 ( $\text{CH}_3$ ), 22.67 ( $\text{CH}_2\text{CH}_3$ ), 24.31 ( $\text{CH}_2(\text{CH}_2)_2\text{Br}$ ), 25.61 ( $\text{CH}_2(\text{CH}_2)_9\text{CH}_3$ ), 29.34, 29.58, 29.59, 29.62, 29.63 and 29.65 ( $\text{CH}_2$ ), 31.90 ( $\text{CH}_2\text{CH}_2\text{CH}_3$ ), 32.77 ( $\text{CH}_2\text{CH}_2\text{Br}$ ), 33.71 ( $\text{CH}_2\text{Br}$ ), 36.43 ( $\text{CH}_2(\text{CH}_2)_{10}\text{CH}_3$ ), 37.54 ( $\text{CH}_2(\text{CH}_2)_3\text{Br}$ ), 71.70 ( $\text{CH}$ ); APCI-MS  $m/z$  255.7 ( $\text{M} - \text{HBr} + \text{H}$ ).

**(5RS)-1-Bromoicosan-5-ol (4f).** Following the general procedure, **8c** (9.9 g, 26.40 mmol) and lithium aluminium hydride (0.43 g, 11.32 mmol) gave **4f** (6.94 g, 70%) as white solid. M.p.  $57\text{--}58\text{ }^{\circ}\text{C}$ ;  $\text{C}_{20}\text{H}_{41}\text{BrO}$  requires C, 63.64; H, 10.95; found: C, 63.49; H, 11.03;  $^1\text{H}$  NMR (400 MHz,  $\text{CDCl}_3$ ,  $27\text{ }^{\circ}\text{C}$ )  $\delta$  0.88 (t,  $J = 6.7\text{ Hz}$ , 3 H,  $\text{CH}_3$ ), 1.21–1.68 (m, 32 H,  $\text{CH}_2$ ), 1.82–1.95 (m, 2 H,  $\text{CH}_2\text{CH}_2\text{Br}$ ), 3.42 (t,  $J = 6.8\text{ Hz}$ , 2 H,  $\text{CH}_2\text{Br}$ ), 3.57–3.64 (m, 1 H,  $\text{CH}$ );  $^{13}\text{C}$  NMR (100 MHz,  $\text{CDCl}_3$ ,  $27\text{ }^{\circ}\text{C}$ )  $\delta$  14.09 ( $\text{CH}_3$ ), 22.67 ( $\text{CH}_2\text{CH}_3$ ), 24.31 ( $\text{CH}_2(\text{CH}_2)_2\text{Br}$ ), 25.61 ( $\text{CH}_2(\text{CH}_2)_{12}\text{CH}_3$ ), 29.34, 29.58, 29.60, 29.64, 29.65 and 29.67 ( $\text{CH}_2$ ), 31.90 ( $\text{CH}_2\text{CH}_2\text{CH}_3$ ), 32.78 ( $\text{CH}_2\text{CH}_2\text{Br}$ ), 33.70 ( $\text{CH}_2\text{Br}$ ), 36.44 ( $\text{CH}_2(\text{CH}_2)_{13}\text{CH}_3$ ), 37.54 ( $\text{CH}_2(\text{CH}_2)_3\text{Br}$ ), 71.70 ( $\text{CH}$ ); APCI-MS  $m/z$  359.3 ( $\text{M} - \text{H}_2\text{O} + \text{H}$ ,  $^{79}\text{Br}$  isotope), 361.3 ( $\text{M} - \text{H}_2\text{O} + \text{H}$ ,  $^{81}\text{Br}$  isotope), 295.3 ( $\text{M} - \text{HBr} + \text{H}$ ).



## Organic & Biomolecular Chemistry

**General procedure for the synthesis of THP-protected 1-bromoalkan-5-ols 5.** The bromoalkanols **4a-f** (1 equiv.) were dissolved in dry di-chloromethane (150 mL) at room temperature. 3,4-Dihydro-2*H*-pyran (DHP; 1.8 equiv.) and pyridinium *p*-toluenesulfonate (PPTS; 10 mol%) were added and the mixture was stirred for 20 h. Afterwards, the organic solution was washed with water (150 mL), dried over sodium sulphate and concentrated to dryness under reduced pressure. The crude oil was purified by column chromatography using heptane/triethylamine/diethyl ether (98.5/0.5/1, v/v/v) as eluent yielding the THP-protected bromoalkanols **5a-f**.

**2-[(1*RS*)-5-Bromo-1-butylpentyl]oxy}tetrahydro-2*H*-pyran (5a).** Following the general procedure, **4a** (8.16 g, 36.57 mmol) and 3,4-dihydro-2*H*-pyran (5.55 g, 65.98 mmol) gave **5a** (9.22 g, 82%) as a colourless oil. C<sub>14</sub>H<sub>27</sub>BrO<sub>2</sub> requires C, 54.72; H, 8.86; found: C, 54.25; H, 8.66; <sup>1</sup>H NMR (400 MHz, CDCl<sub>3</sub>, 27 °C) δ 0.76–0.90 (m, 3 H, CH<sub>3</sub>), 1.14–1.72 (m, 16 H, CH<sub>2</sub>), 1.72–1.90 (m, 2 H, CH<sub>2</sub>CH<sub>2</sub>Br), 3.32–3.49 (m, 3 H, CH<sub>2</sub>Br and OCHOCHH), 3.51–3.97 (m, 2 H, CHOthp and OCHOCHH), 4.55–4.63 (m, 1 H, OCHO); <sup>13</sup>C NMR (100 MHz, CDCl<sub>3</sub>, 27 °C) δ 14.03 (CH<sub>3</sub>), 19.91 and 20.05 (OCHO(CH<sub>2</sub>)<sub>2</sub>CH<sub>2</sub>), 22.81 and 22.88 (CH<sub>2</sub>CH<sub>3</sub>), 23.57, 24.17, 25.50 and 25.51 (CH<sub>2</sub>(CH<sub>2</sub>)<sub>2</sub>Br and OCHOCH<sub>2</sub>CH<sub>2</sub>), 27.24 and 27.73 (CH<sub>2</sub>CH<sub>2</sub>CH<sub>3</sub>), 31.17, 31.20, 32.47, 32.93, 32.94, 33.22, 33.58, 33.59, 33.68, 33.69, 34.03 and 34.63 (CH<sub>2</sub>), 62.61 and 62.83 (OCHOCH<sub>2</sub>), 76.33 and 76.36 (CHOthp), 97.57 and 97.70 (OCHO); ESI-MS *m/z* 329.77 (M + Na, <sup>79</sup>Br isotope), 331.46 (M + Na, <sup>81</sup>Br isotope).

**2-[(1*RS*)-1-(4-Brombutyl)hexyl]oxy}tetrahydro-2*H*-pyran (5b).** Following the general procedure, **4b** (9.77 g, 41.19 mmol) and 3,4-dihydro-2*H*-pyran (6.30 g, 74.89 mmol) gave **5b** (11.51 g, 87%) as a colourless oil. C<sub>15</sub>H<sub>29</sub>BrO<sub>2</sub> requires C, 56.07; H, 9.10; found: C, 55.57; H, 9.12; <sup>1</sup>H NMR (400 MHz, CDCl<sub>3</sub>, 27 °C) δ 0.89 (t, *J* = 6.9 Hz, 3 H, CH<sub>3</sub>), 1.20–1.95 (m, 20 H, CH<sub>2</sub>), 3.37–3.44 (m, 2 H, CH<sub>2</sub>Br), 3.45–3.52 (m, 1 H, CHOthp), 3.55–3.66 (m, 1 H, OCHOCHH), 3.85–3.96 (m, 1 H, OCHOCHH), 4.59–4.68 (m, 1 H, OCHO); <sup>13</sup>C NMR (100 MHz, CDCl<sub>3</sub>, 27 °C) δ 14.01 and 14.06 (CH<sub>3</sub>), 19.93 and 20.10 (OCHO(CH<sub>2</sub>)<sub>2</sub>CH<sub>2</sub>), 22.61 (CH<sub>2</sub>CH<sub>3</sub>), 23.62 (CH<sub>2</sub>(CH<sub>2</sub>)<sub>2</sub>Br), 24.23, 24.71, 25.26, 25.51 and 25.53 (CH<sub>2</sub>(CH<sub>2</sub>)<sub>2</sub>CH<sub>3</sub> and OCHOCH<sub>2</sub>CH<sub>2</sub>), 31.19 and 31.23 (CH<sub>2</sub>CH<sub>2</sub>CH<sub>3</sub>), 32.01, 32.05, 32.51, 32.96, 32.97, 33.51, 33.75 and 33.85 (CH<sub>2</sub>), 34.07 and 34.94 (CH<sub>2</sub>(CH<sub>2</sub>)<sub>3</sub>Br and CH<sub>2</sub>(CH<sub>2</sub>)<sub>3</sub>CH<sub>3</sub>), 62.69 and 62.94 (OCHOCH<sub>2</sub>), 76.43 and 76.49 (CHOthp), 97.64 and 97.77 (OCHO); ESI-MS *m/z* 343.38 (M + Na, <sup>79</sup>Br isotope), 345.34 (M + Na, <sup>81</sup>Br isotope).

**2-[(1*RS*)-1-(4-Brombutyl)octyl]oxy}tetrahydro-2*H*-pyran (5c).** Following the general procedure, **4c** (10.66 g, 40.19 mmol) and 3,4-dihydro-2*H*-pyran (6.10 g, 72.52 mmol) gave **5c** (12.88 g, 92%) as a colourless oil. C<sub>17</sub>H<sub>33</sub>BrO<sub>2</sub> requires C, 58.45; H, 9.52; found: C, 57.86; H, 9.74; <sup>1</sup>H NMR (400 MHz, CDCl<sub>3</sub>, 27 °C) δ 0.88 (t, *J* = 6.7 Hz, 3 H, CH<sub>3</sub>), 1.24–1.94 (m, 24 H, CH<sub>2</sub>), 3.38–3.44 (m, 2 H, CH<sub>2</sub>Br), 3.45–3.52 (m, 1 H, CHOthp), 3.55–3.66 (m, 1 H, OCHOCHH), 3.85–3.95 (m, 1 H, OCHOCHH), 4.59–4.67 (m, 1 H, OCHO); <sup>13</sup>C NMR (100 MHz, CDCl<sub>3</sub>, 27 °C) δ 14.07 (CH<sub>3</sub>), 19.93 and 20.09 (OCHO(CH<sub>2</sub>)<sub>2</sub>CH<sub>2</sub>), 22.63 (CH<sub>2</sub>CH<sub>3</sub>), 23.62 (CH<sub>2</sub>(CH<sub>2</sub>)<sub>2</sub>Br), 24.22, 25.05, 25.51 and 25.60 (CH<sub>2</sub>(CH<sub>2</sub>)<sub>4</sub>CH<sub>3</sub> and OCHOCH<sub>2</sub>CH<sub>2</sub>), 31.19 and 31.23 (CH<sub>2</sub>CH<sub>2</sub>CH<sub>3</sub>), 31.80, 31.85, 32.51, 32.96, 32.97, 33.56, 33.74 and 33.84 (CH<sub>2</sub>), 34.07 and 34.98

## Organic & Biomolecular Chemistry

(CH<sub>2</sub>(CH<sub>2</sub>)<sub>3</sub>Br and CH<sub>2</sub>(CH<sub>2</sub>)<sub>5</sub>CH<sub>3</sub>), 62.69 and 62.93 (OCHOCH<sub>2</sub>), 76.42 and 76.48 (CHOthp), 97.64 and 97.77 (OCHO); ESI-MS *m/z* 371.70 (M + Na, <sup>79</sup>Br isotope), 373.56 (M + Na, <sup>81</sup>Br isotope).

**2-[(1*RS*)-1-(4-Brombutyl)nonyl]oxy}tetrahydro-2*H*-pyran (5d).** Following the general procedure, **4d** (4.04 g, 14.47 mmol) and 3,4-dihydro-2*H*-pyran (2.19 g, 26.04 mmol) gave **5d** (5.22 g, 99%) as a colourless oil. C<sub>18</sub>H<sub>35</sub>BrO<sub>2</sub> requires C, 59.50; H, 9.71; found: C, 59.29; H, 9.74; <sup>1</sup>H NMR (500 MHz, CDCl<sub>3</sub>, 27 °C) δ 0.88 (t, *J* = 6.9 Hz, 3 H, CH<sub>3</sub>), 1.20–1.94 (m, 26 H, CH<sub>2</sub>), 3.37–3.43 (m, 2 H, CH<sub>2</sub>Br), 3.45–3.52 (m, 1 H, CHOthp), 3.55–3.65 (m, 1 H, OCHOCHH), 3.85–3.97 (m, 1 H, OCHOCHH), 4.59–4.67 (m, 1 H, OCHO); <sup>13</sup>C NMR (125 MHz, CDCl<sub>3</sub>, 27 °C) δ 14.08 (CH<sub>3</sub>), 19.93 (OCHO(CH<sub>2</sub>)<sub>2</sub>CH<sub>2</sub>), 22.65 (CH<sub>2</sub>CH<sub>3</sub>), 23.62 (CH<sub>2</sub>(CH<sub>2</sub>)<sub>2</sub>Br), 25.53 and 25.59 (CH<sub>2</sub>(CH<sub>2</sub>)<sub>5</sub>CH<sub>3</sub> and OCHOCH<sub>2</sub>CH<sub>2</sub>), 29.29, 29.55, 29.80, 31.19 and 31.87 (CH<sub>2</sub>), 32.51 and 32.96 (CH<sub>2</sub>CH<sub>2</sub>Br and CH<sub>2</sub>Br), 33.73 and 34.98 (CH<sub>2</sub>(CH<sub>2</sub>)<sub>3</sub>Br and CH<sub>2</sub>(CH<sub>2</sub>)<sub>6</sub>CH<sub>3</sub>), 62.69 (OCHOCH<sub>2</sub>), 76.47 (CHOthp), 97.63 (OCHO); ESI-MS *m/z* 385.63 (M + Na, <sup>79</sup>Br isotope), 387.49 (M + Na, <sup>81</sup>Br isotope).

**2-[(1*RS*)-1-(4-Brombutyl)tridecyl]oxy}tetrahydro-2*H*-pyran (5e).** Following the general procedure, **4e** (4.16 g, 12.41 mmol) and 3,4-dihydro-2*H*-pyran (2.11 g, 25.08 mmol) gave **5e** (4.82 g, 93%) as a colourless oil. C<sub>22</sub>H<sub>43</sub>BrO<sub>2</sub> requires C, 62.99; H, 10.33; found: C, 62.36; H, 10.41; <sup>1</sup>H NMR (400 MHz, CDCl<sub>3</sub>, 27 °C) δ 0.85–0.91 (m, 3 H, CH<sub>3</sub>), 1.21–1.76 (m, 32 H, CH<sub>2</sub>), 1.77–1.96 (m, 2 H, CH<sub>2</sub>CH<sub>2</sub>Br), 3.36–3.44 (m, 2 H, CH<sub>2</sub>Br), 3.44–3.52 (m, 1 H, CHOthp), 3.55–3.66 (m, 1 H, OCHOCHH), 3.85–3.96 (m, 1 H, OCHOCHH), 4.59–4.67 (m, 1 H, OCHO); <sup>13</sup>C NMR (100 MHz, CDCl<sub>3</sub>, 27 °C) δ 14.08 (CH<sub>3</sub>), 19.93 and 20.10 (OCHO(CH<sub>2</sub>)<sub>2</sub>CH<sub>2</sub>), 22.66 (CH<sub>2</sub>CH<sub>3</sub>), 23.62 and 24.22 (CH<sub>2</sub>(CH<sub>2</sub>)<sub>2</sub>Br), 25.05, 25.52 and 25.59 (CH<sub>2</sub>(CH<sub>2</sub>)<sub>9</sub>CH<sub>3</sub> and OCHOCH<sub>2</sub>CH<sub>2</sub>), 29.33, 29.58, 29.60, 29.63, 29.65, 29.66, 29.80, 29.85, 31.19 and 31.23 (CH<sub>2</sub>), 31.90 (CH<sub>2</sub>CH<sub>2</sub>CH<sub>3</sub>), 32.96 and 32.97 (CH<sub>2</sub>CH<sub>2</sub>Br), 33.56 (CH<sub>2</sub>Br), 33.72, 33.82, 34.07 and 34.98 (CH<sub>2</sub>(CH<sub>2</sub>)<sub>3</sub>Br and CH<sub>2</sub>(CH<sub>2</sub>)<sub>10</sub>CH<sub>3</sub>), 62.68 and 62.93 (OCHOCH<sub>2</sub>), 76.43 and 76.47 (CHOthp), 97.62 and 97.77 (OCHO); ESI-MS *m/z* 441.80 (M + Na, <sup>79</sup>Br isotope), 443.62 (M + Na, <sup>81</sup>Br isotope).

**2-[(1*RS*)-1-(4-Brombutyl)hexadecyl]oxy}tetrahydro-2*H*-pyran (5f).** Following the general procedure, **4f** (6.94 g, 18.39 mmol) and 3,4-dihydro-2*H*-pyran (2.80 g, 33.29 mmol) gave **5f** (6.96 g, 82%) as a colourless oil. C<sub>25</sub>H<sub>49</sub>BrO<sub>2</sub> requires C, 65.06; H, 10.70; found: C, 64.71; H, 10.57; <sup>1</sup>H NMR (400 MHz, CDCl<sub>3</sub>, 27 °C) δ 0.84–0.92 (m, 3 H, CH<sub>3</sub>), 1.23–1.93 (m, 40 H, CH<sub>2</sub>), 3.36–3.44 (m, 2 H, CH<sub>2</sub>Br), 3.44–3.52 (m, 1 H, CHOthp), 3.55–3.66 (m, 1 H, OCHOCHH), 3.85–3.95 (m, 1 H, OCHOCHH), 4.59–4.67 (m, 1 H, OCHO); <sup>13</sup>C NMR (100 MHz, CDCl<sub>3</sub>, 27 °C) δ 14.08 (CH<sub>3</sub>), 19.93 and 20.10 (OCHO(CH<sub>2</sub>)<sub>2</sub>CH<sub>2</sub>), 22.67 (CH<sub>2</sub>CH<sub>3</sub>), 23.62 (CH<sub>2</sub>(CH<sub>2</sub>)<sub>2</sub>Br), 24.22, 25.05, 25.52 and 25.59 (CH<sub>2</sub>(CH<sub>2</sub>)<sub>12</sub>CH<sub>3</sub> and OCHOCH<sub>2</sub>CH<sub>2</sub>), 29.34, 29.59, 29.60, 29.64, 29.66, 29.68, 29.80, 31.19 and 31.23 (CH<sub>2</sub>), 31.90 (CH<sub>2</sub>CH<sub>2</sub>CH<sub>3</sub>), 32.51, 32.96 and 32.97 (CH<sub>2</sub>CH<sub>2</sub>Br and CH<sub>2</sub>Br), 34.07 and 34.98 (CH<sub>2</sub>(CH<sub>2</sub>)<sub>3</sub>Br and CH<sub>2</sub>(CH<sub>2</sub>)<sub>13</sub>CH<sub>3</sub>), 62.67 and 62.69 (OCHOCH<sub>2</sub>), 76.42 (CHOthp), 97.61 and 97.76 (OCHO); ESI-MS *m/z* 484.83 (M + Na, <sup>79</sup>Br isotope), 486.17 (M + Na, <sup>81</sup>Br isotope).

## Organic & Biomolecular Chemistry

**General procedure for the synthesis of alkyl-branched diols 10.** The bis-THP-ether **9a-f** and catalytic amounts of pyridinium *p*-toluenesulfonate were suspended in dry methanol (150 mL) and the mixture was heated under reflux for at least 3 h until a white precipitate appeared and no educt is detectable via TLC. The hot suspension was filtered off giving the diols **10a-f** as white solids.

**(5*RS*,36*RS*)-Tetracontane-5,36-diol (10a).** Following the general procedure, **9a** (1.50 g, 1.97 mmol) gave **10a** (1.14 g, 97%) as white solid. M.p. 109–110 °C; C<sub>40</sub>H<sub>82</sub>O<sub>2</sub> requires C, 80.73; H, 13.89; found: C, 80.05; H, 14.20; <sup>1</sup>H NMR (400 MHz, CDCl<sub>3</sub>, 27 °C) δ 0.91 (t, *J* = 6.9 Hz, 6 H, 2× CH<sub>3</sub>), 1.13–1.80 (m, 72 H, CH<sub>2</sub>), 3.40–3.76 (m, 2 H, 2× CHOH); <sup>13</sup>C NMR (125 MHz, CDCl<sub>3</sub>, 50 °C) δ 13.90 (CH<sub>3</sub>), 22.68 (CH<sub>2</sub>CH<sub>3</sub>), 25.58 (CH<sub>2</sub>CH<sub>2</sub>CHOH(CH<sub>2</sub>)<sub>3</sub>CH<sub>3</sub>), 27.78 (CH<sub>2</sub>CH<sub>2</sub>CH<sub>3</sub>), 29.53, 29.55, 29.57, 29.59, 29.61 and 29.64 (CH<sub>2</sub>), 37.17 (CH<sub>2</sub>(CH<sub>2</sub>)<sub>2</sub>CH<sub>3</sub>), 37.50 (CH<sub>2</sub>CHOH(CH<sub>2</sub>)<sub>3</sub>CH<sub>3</sub>), 71.96 (CHOH); APCI-MS *m/z* 559.9 (M – 2× H<sub>2</sub>O + H), 595.9 (M + H).

**(6*RS*,37*RS*)-Dotetracontane-6,37-diol (10b).** Following the general procedure, **9b** (2.71 g, 3.43 mmol) gave **10b** (2.08 g, 98%) as white solid. M.p. 109–111 °C; C<sub>42</sub>H<sub>86</sub>O<sub>2</sub> requires C, 80.95; H, 13.91; found: C, 80.60; H, 14.17; <sup>1</sup>H NMR (500 MHz, CDCl<sub>3</sub>, 50 °C) δ 0.90 (t, *J* = 6.9 Hz, 6 H, 2× CH<sub>3</sub>), 1.25–1.47 (m, 76 H, CH<sub>2</sub>), 3.48–3.64 (m, 2 H, 2× CHOH); <sup>13</sup>C NMR (125 MHz, CDCl<sub>3</sub>, 50 °C) δ 13.87 (CH<sub>3</sub>), 22.54 (CH<sub>2</sub>CH<sub>3</sub>), 25.23 (CH<sub>2</sub>CH<sub>2</sub>CHOH(CH<sub>2</sub>)<sub>4</sub>CH<sub>3</sub>), 25.58 (CH<sub>2</sub>(CH<sub>2</sub>)<sub>2</sub>CH<sub>3</sub>), 29.53, 29.55, 29.61 and 29.65 (CH<sub>2</sub>), 31.87 (CH<sub>2</sub>CH<sub>2</sub>CH<sub>3</sub>), 37.45 and 37.50 (CH<sub>2</sub>CHOHCH<sub>2</sub>), 71.99 (CHOH); APCI-MS *m/z* 588.2 (M – 2× H<sub>2</sub>O + H).

**(8*RS*,39*RS*)-Hexatetracontane-8,39-diol (10c).** Following the general procedure, **9c** (4.39 g, 5.18 mmol) gave **10c** (3.38 g, 97%) as white solid. M.p. 110–112 °C; C<sub>46</sub>H<sub>94</sub>O<sub>2</sub> requires C, 81.34; H, 13.95; found: C, 81.08; H, 14.18; <sup>1</sup>H NMR (500 MHz, CDCl<sub>3</sub>, 50 °C) δ 0.89 (t, *J* = 6.8 Hz, 6 H, 2× CH<sub>3</sub>), 1.12–1.64 (m, 84 H, CH<sub>2</sub>), 3.54–3.62 (m, 2 H, 2× CHOH); <sup>13</sup>C NMR (125 MHz, CDCl<sub>3</sub>, 50 °C) δ 13.91 (CH<sub>3</sub>), 22.55 (CH<sub>2</sub>CH<sub>3</sub>), 25.58 (CH<sub>2</sub>CH<sub>2</sub>CHOHCH<sub>2</sub>CH<sub>2</sub>), 29.20, 29.54, 29.55, 29.58, 29.59, 29.61 and 29.66 (CH<sub>2</sub>), 31.76 (CH<sub>2</sub>CH<sub>2</sub>CH<sub>3</sub>), 37.49 (CH<sub>2</sub>CHOHCH<sub>2</sub>), 71.99 (CHOH); APCI-MS *m/z* 644.1 (M – 2× H<sub>2</sub>O + H).

**(9*RS*,40*RS*)-Octatetracontane-9,40-diol (10d).** Following the general procedure, **9d** (0.17 g, 0.19 mmol) gave **10d** (0.11 g, 82%) as white solid. M.p. 112–113 °C; <sup>1</sup>H NMR (500 MHz, CDCl<sub>3</sub>, 50 °C) δ 0.89 (t, *J* = 6.7 Hz, 6 H, 2× CH<sub>3</sub>), 1.24–1.49 (m, 88 H, CH<sub>2</sub>), 3.45–3.72 (m, 2 H, 2× CHOH); <sup>13</sup>C NMR (125 MHz, CDCl<sub>3</sub>, 27 °C) δ 13.92 (CH<sub>3</sub>), 22.56 (CH<sub>2</sub>CH<sub>3</sub>), 25.58 (CH<sub>2</sub>CH<sub>2</sub>CHOHCH<sub>2</sub>CH<sub>2</sub>), 29.18, 29.51, 29.53, 29.55, 29.61 and 29.65 (CH<sub>2</sub>), 31.80 (CH<sub>2</sub>CH<sub>2</sub>CH<sub>3</sub>), 37.49 (CH<sub>2</sub>CHOHCH<sub>2</sub>), 71.98 (CHOH); APCI-MS *m/z* 672.2 (M – 2× H<sub>2</sub>O + H).

**(13*RS*,44*RS*)-Hexapentacontane-13,44-diol (10e).** Following the general procedure, **9e** (0.61 g, 0.62 mmol) gave **10e** (0.50 g, 99%) as white solid. M.p. 114–116 °C; C<sub>56</sub>H<sub>114</sub>O<sub>2</sub> requires C, 82.07; H, 14.02; found: C, 81.66; H, 13.80; <sup>1</sup>H NMR (500 MHz, CDCl<sub>3</sub>, 50 °C) δ 0.90 (t, *J* = 6.8 Hz, 6 H, 2× CH<sub>3</sub>), 1.18–1.45 (m, 104 H, CH<sub>2</sub>), 3.55–3.65 (m, 2 H, 2× CHOH); <sup>13</sup>C NMR (125 MHz, CDCl<sub>3</sub>, 50 °C) δ 13.94 (CH<sub>3</sub>), 22.56 (CH<sub>2</sub>CH<sub>3</sub>), 25.59 (CH<sub>2</sub>CH<sub>2</sub>CHOHCH<sub>2</sub>CH<sub>2</sub>), 29.26, 29.56, 29.62 and 29.66 (CH<sub>2</sub>), 31.85

## Organic & Biomolecular Chemistry

(CH<sub>2</sub>CH<sub>2</sub>CH<sub>3</sub>), 37.51 (CH<sub>2</sub>CHOHCH<sub>2</sub>), 71.99 (CHOH); APCI-MS *m/z* 784.5 (M – 2× H<sub>2</sub>O + H).

**(16*RS*,47*RS*)-Dohexacontane-16,47-diol (10f).** Following the general procedure, but using dry ethanol instead of methanol, **9f** (1.00 g, 0.94 mmol) gave **10f** (0.68 g, 80%) as white solid. M.p. 116–118 °C; C<sub>62</sub>H<sub>126</sub>O<sub>2</sub> requires C, 82.41; H, 14.05; found: C, 82.14; H, 14.37; <sup>1</sup>H NMR (500 MHz, CDCl<sub>3</sub>, 50 °C) δ 0.89 (t, *J* = 6.8 Hz, 6 H, 2× CH<sub>3</sub>), 1.09–1.71 (m, 116 H, CH<sub>2</sub>), 3.51–3.61 (m, 2 H, 2× CHOH); <sup>13</sup>C NMR (125 MHz, CDCl<sub>3</sub>, 50 °C) δ 13.93 (CH<sub>3</sub>), 22.58 (CH<sub>2</sub>CH<sub>3</sub>), 25.58 (CH<sub>2</sub>CH<sub>2</sub>CHOHCH<sub>2</sub>CH<sub>2</sub>), 29.25, 29.54, 29.55, 29.61, 29.65 and 29.79 (CH<sub>2</sub>), 31.84 (CH<sub>2</sub>CH<sub>2</sub>CH<sub>3</sub>), 37.50 (CH<sub>2</sub>CHOHCH<sub>2</sub>), 71.98 (CHOH); APCI-MS *m/z* 884.0 (M – H<sub>2</sub>O + H), 900.0 (M + H).

# Organic & Biomolecular Chemistry

## 5. Characterization of products: MS, $^1\text{H}$ NMR, $^{13}\text{C}$ NMR spectra

Compound **3a** – ESI-MS (positive mode)

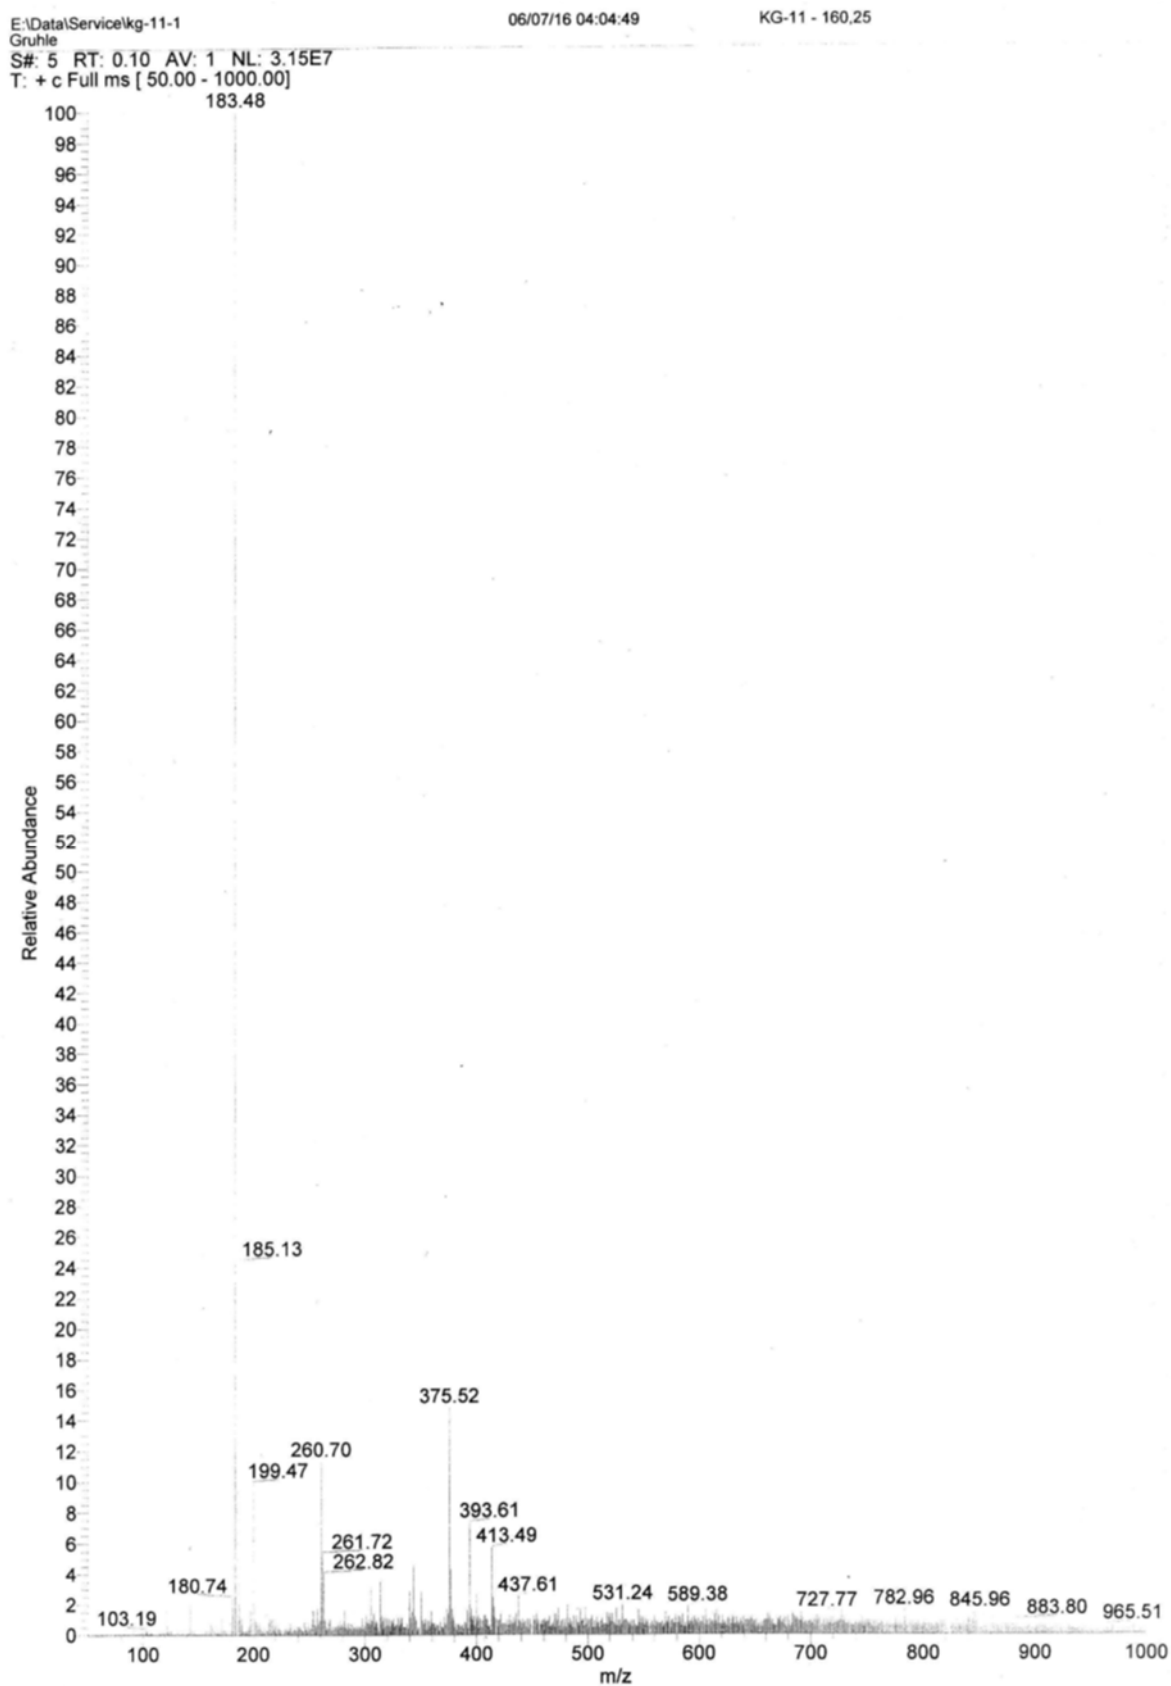

# Organic & Biomolecular Chemistry

## Compound 3a - $^1\text{H}$ NMR

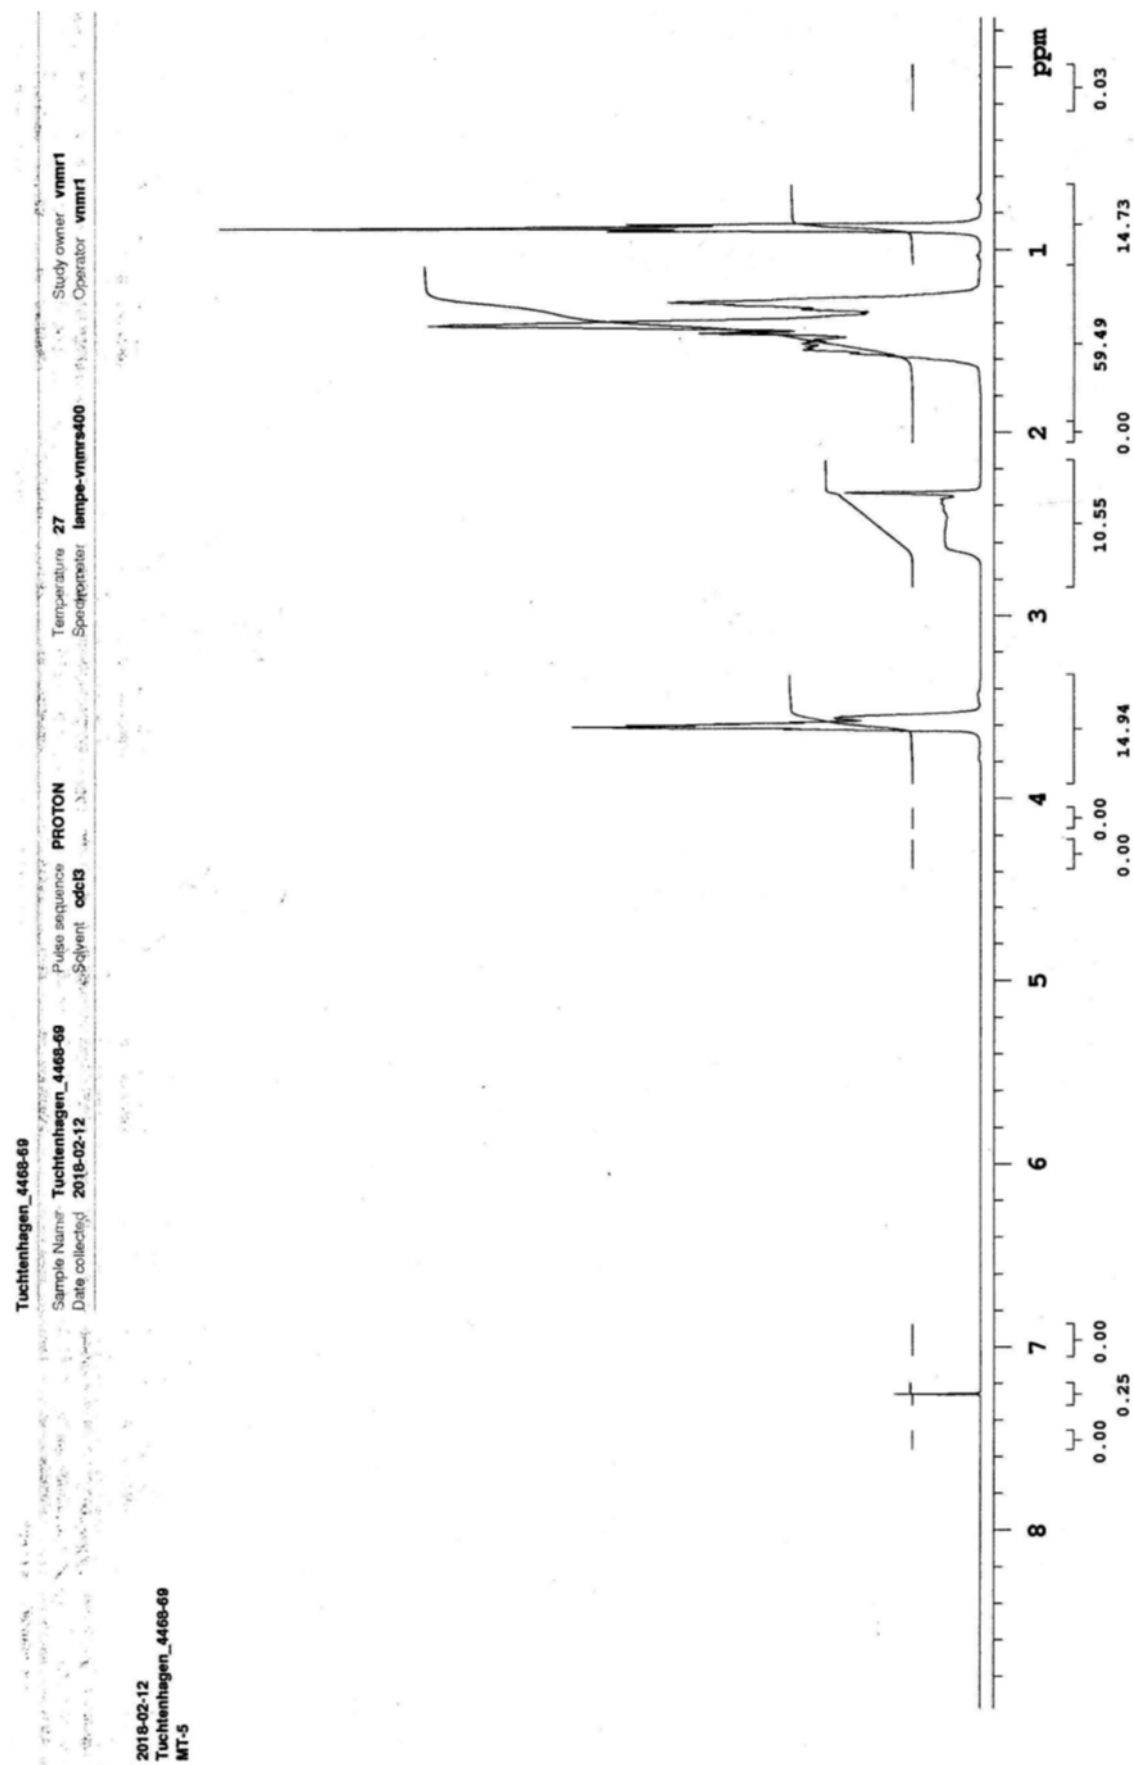

# Organic & Biomolecular Chemistry

Compound 3a –  $^{13}\text{C}$  NMR

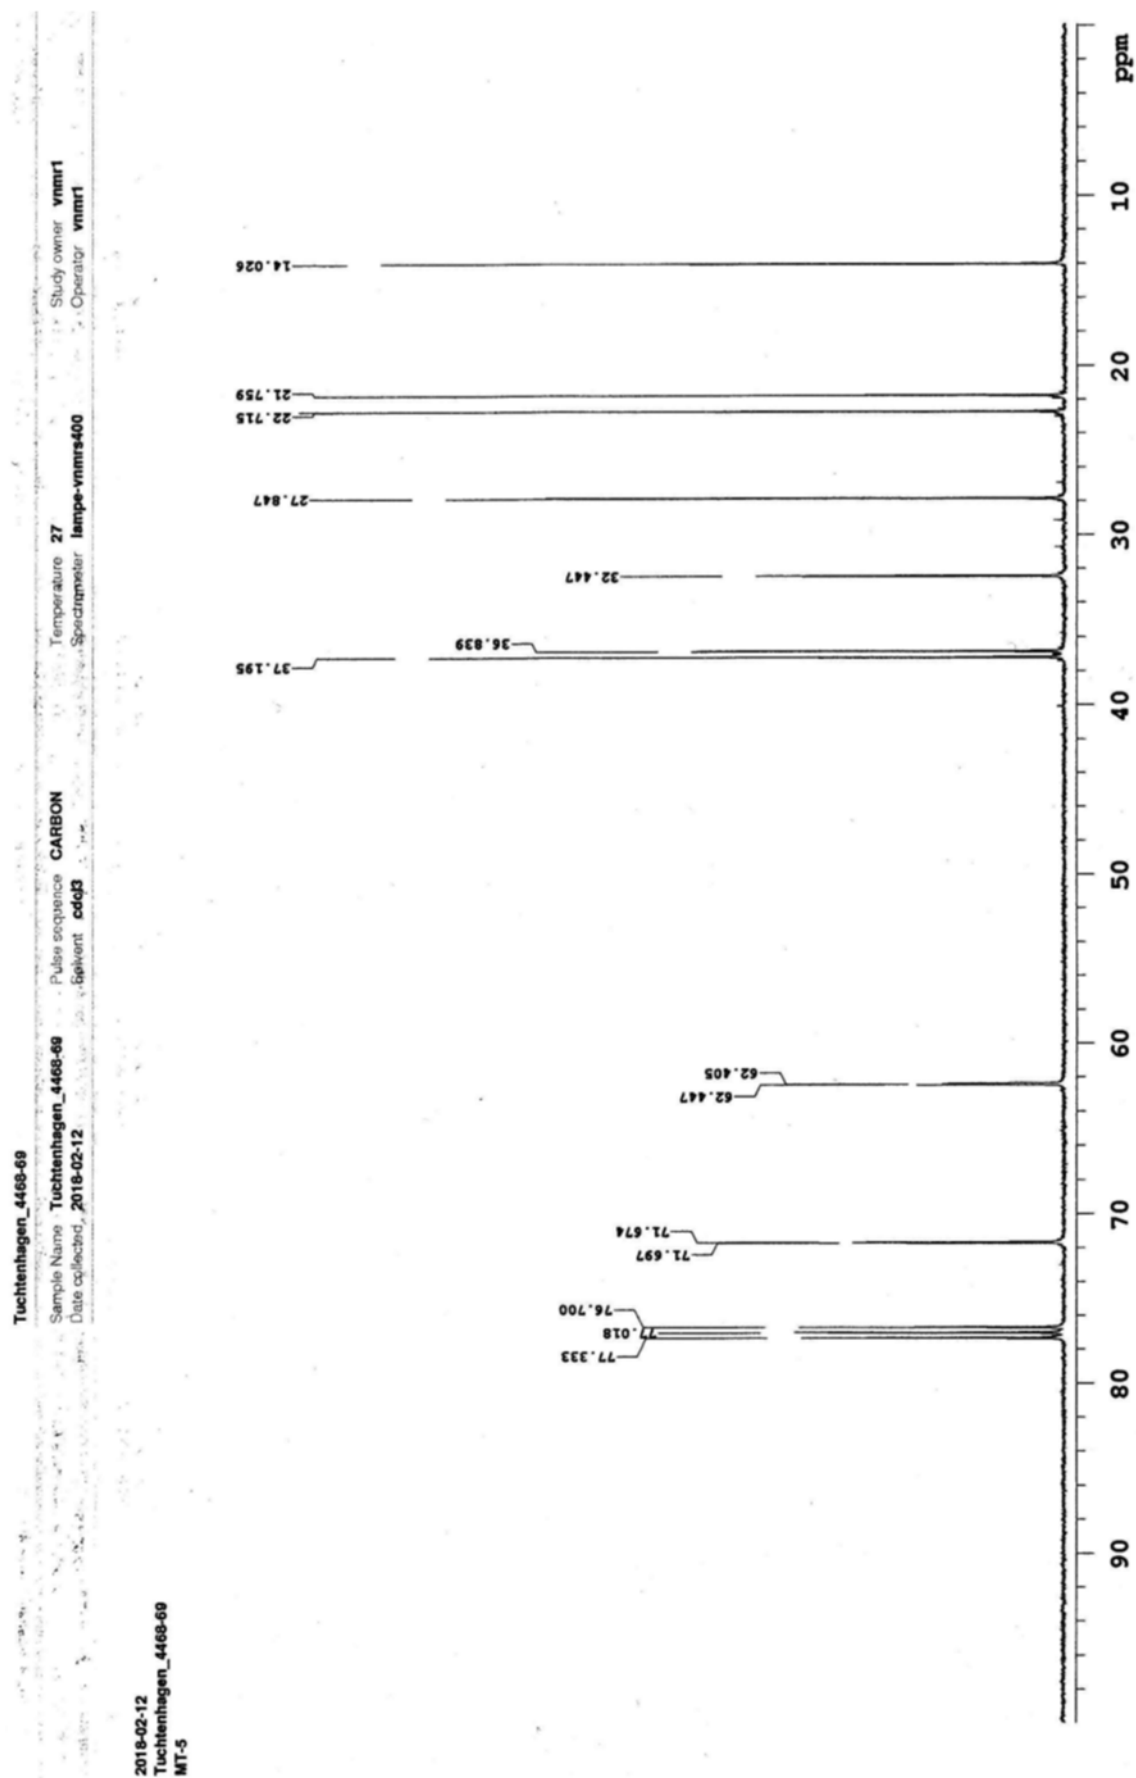

# Organic & Biomolecular Chemistry

Compound 3b – APCI-MS (positive mode)

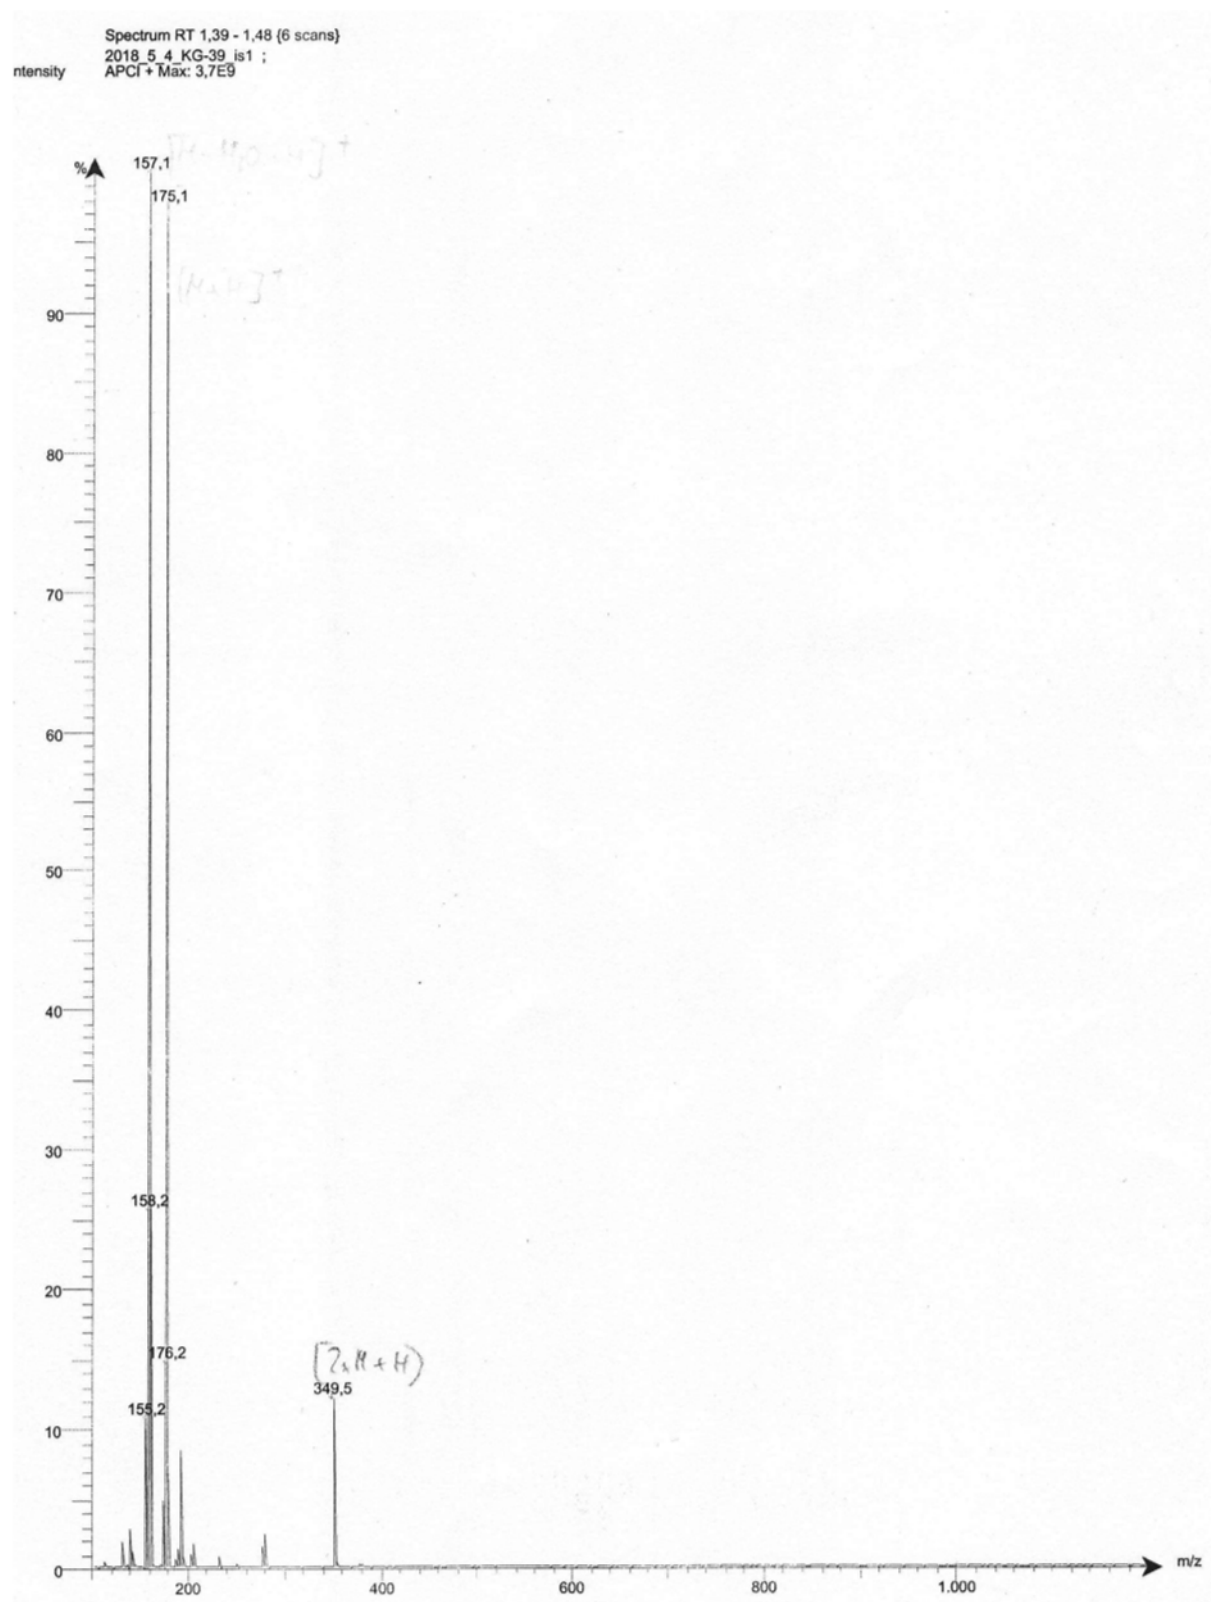



# Organic & Biomolecular Chemistry

Compound 3b -  $^1\text{H}$  NMR

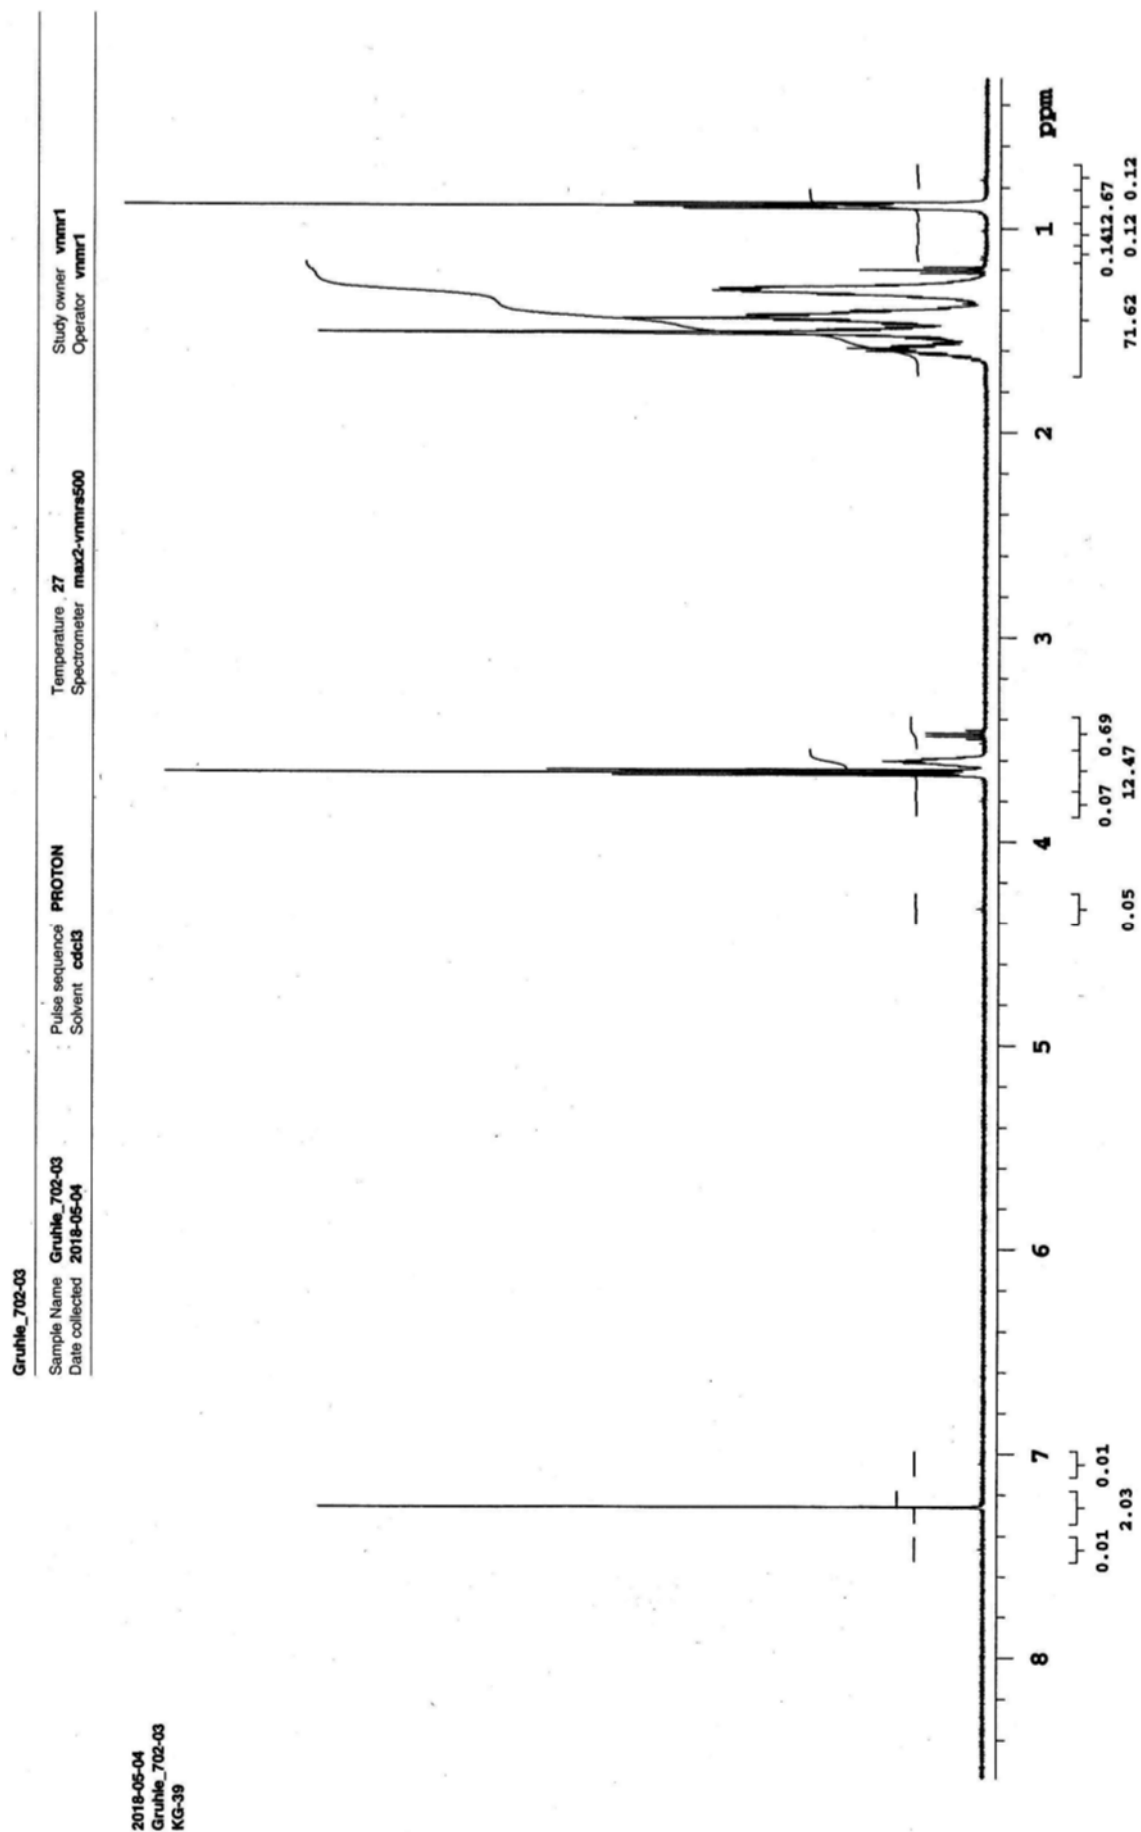

# Organic & Biomolecular Chemistry

Compound 3b -  $^{13}\text{C}$  NMR

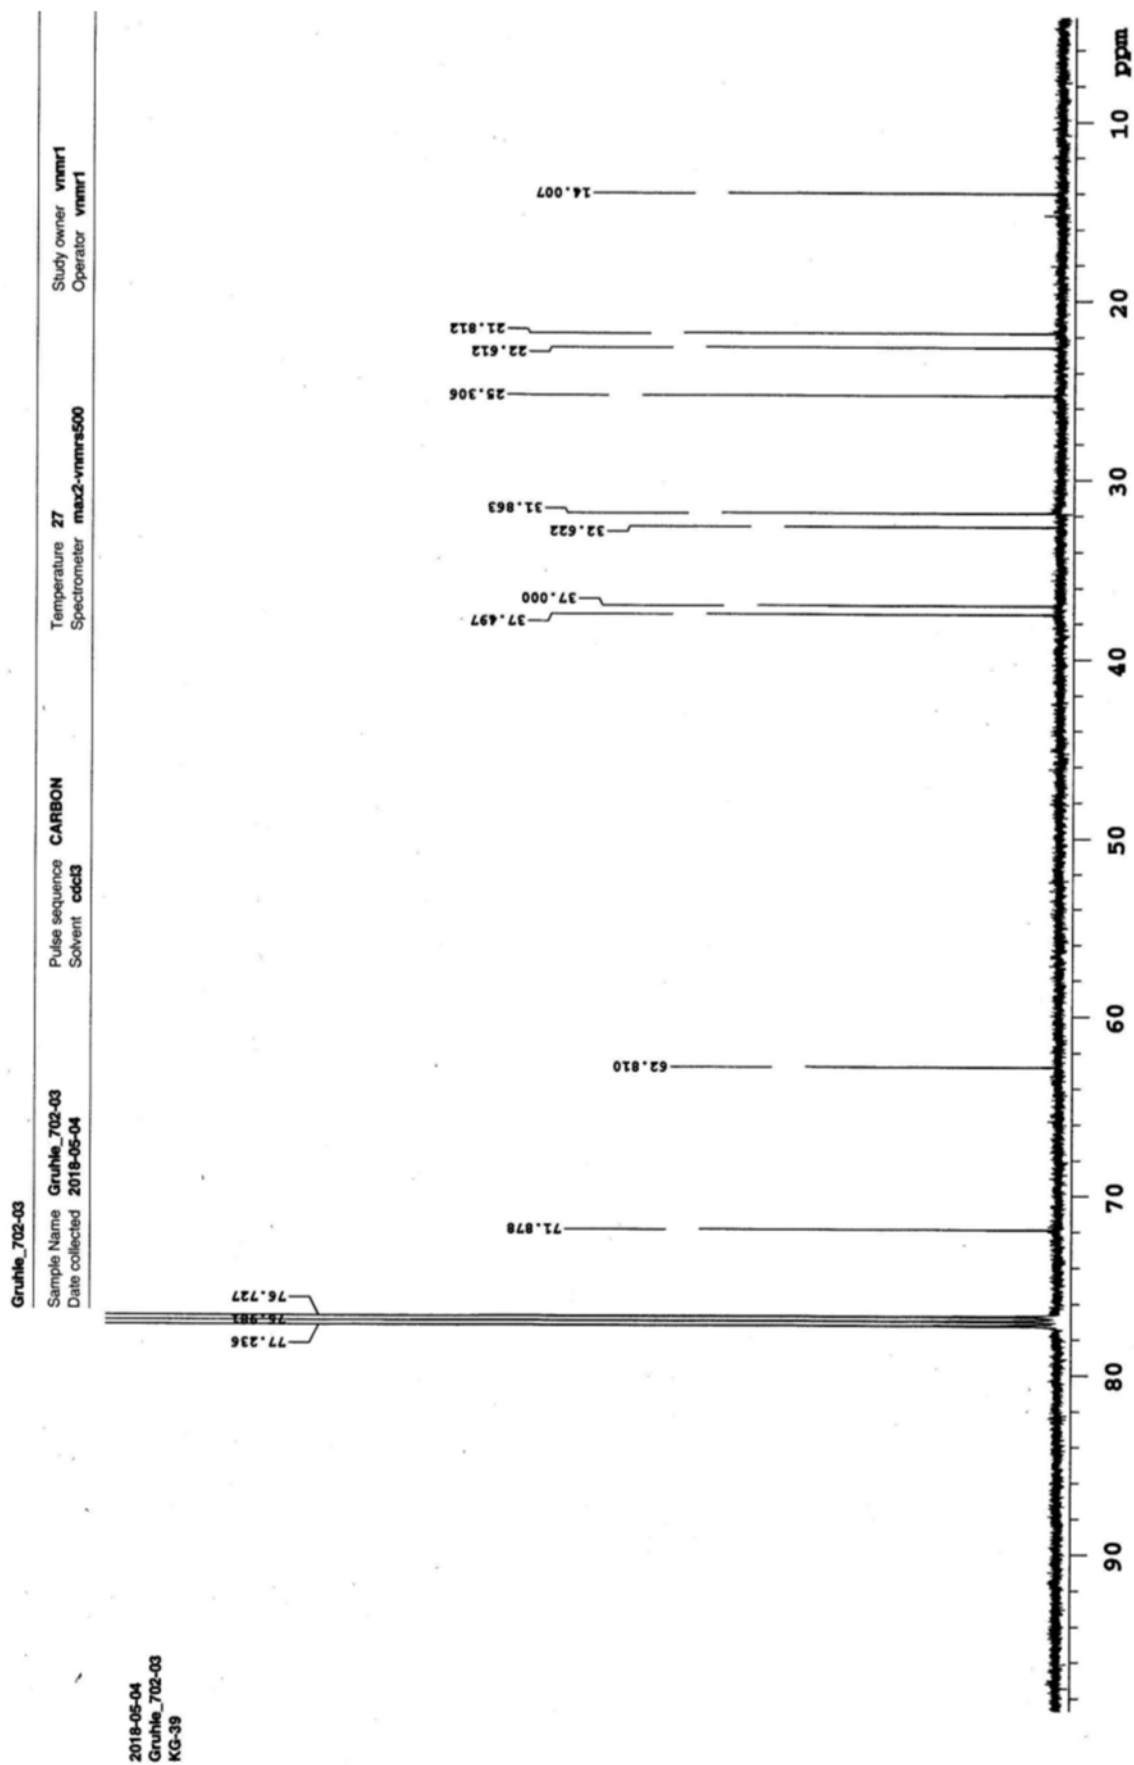

# Organic & Biomolecular Chemistry

Compound 3c – APCI-MS (positive mode)

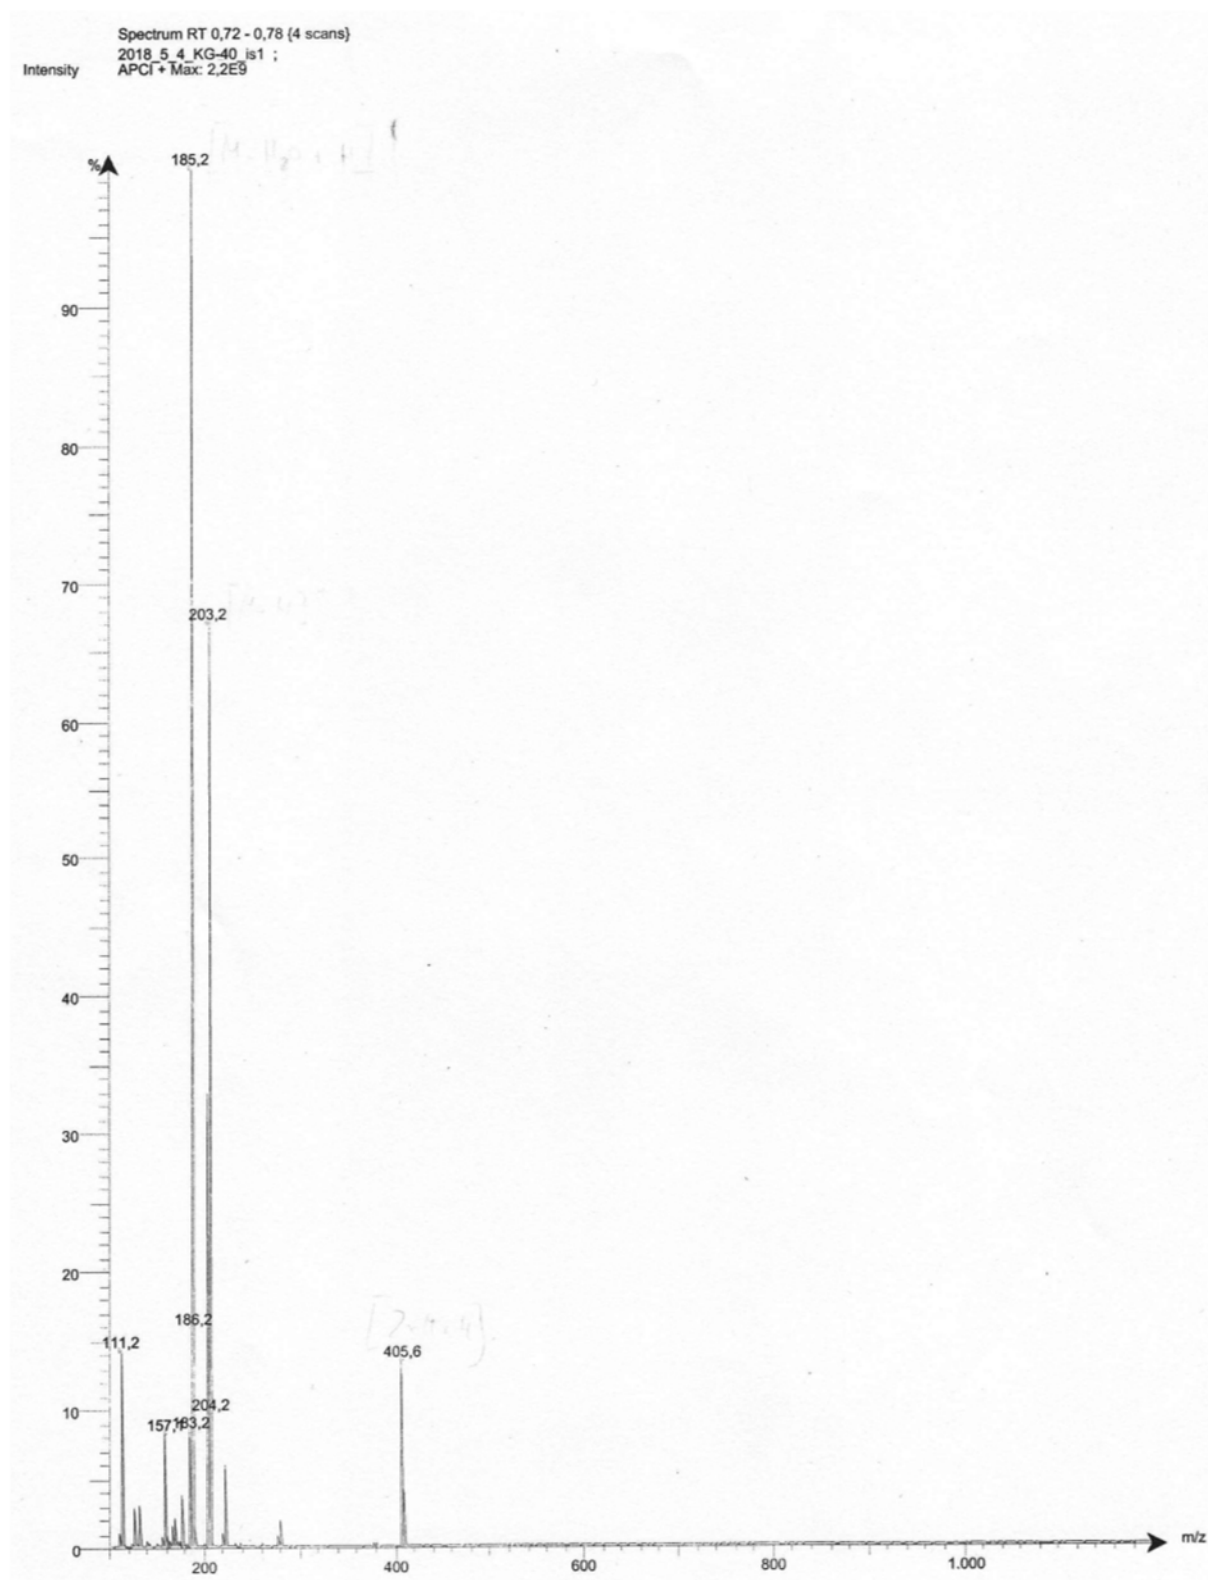

# Organic & Biomolecular Chemistry

Compound 3c -  $^1\text{H}$  NMR

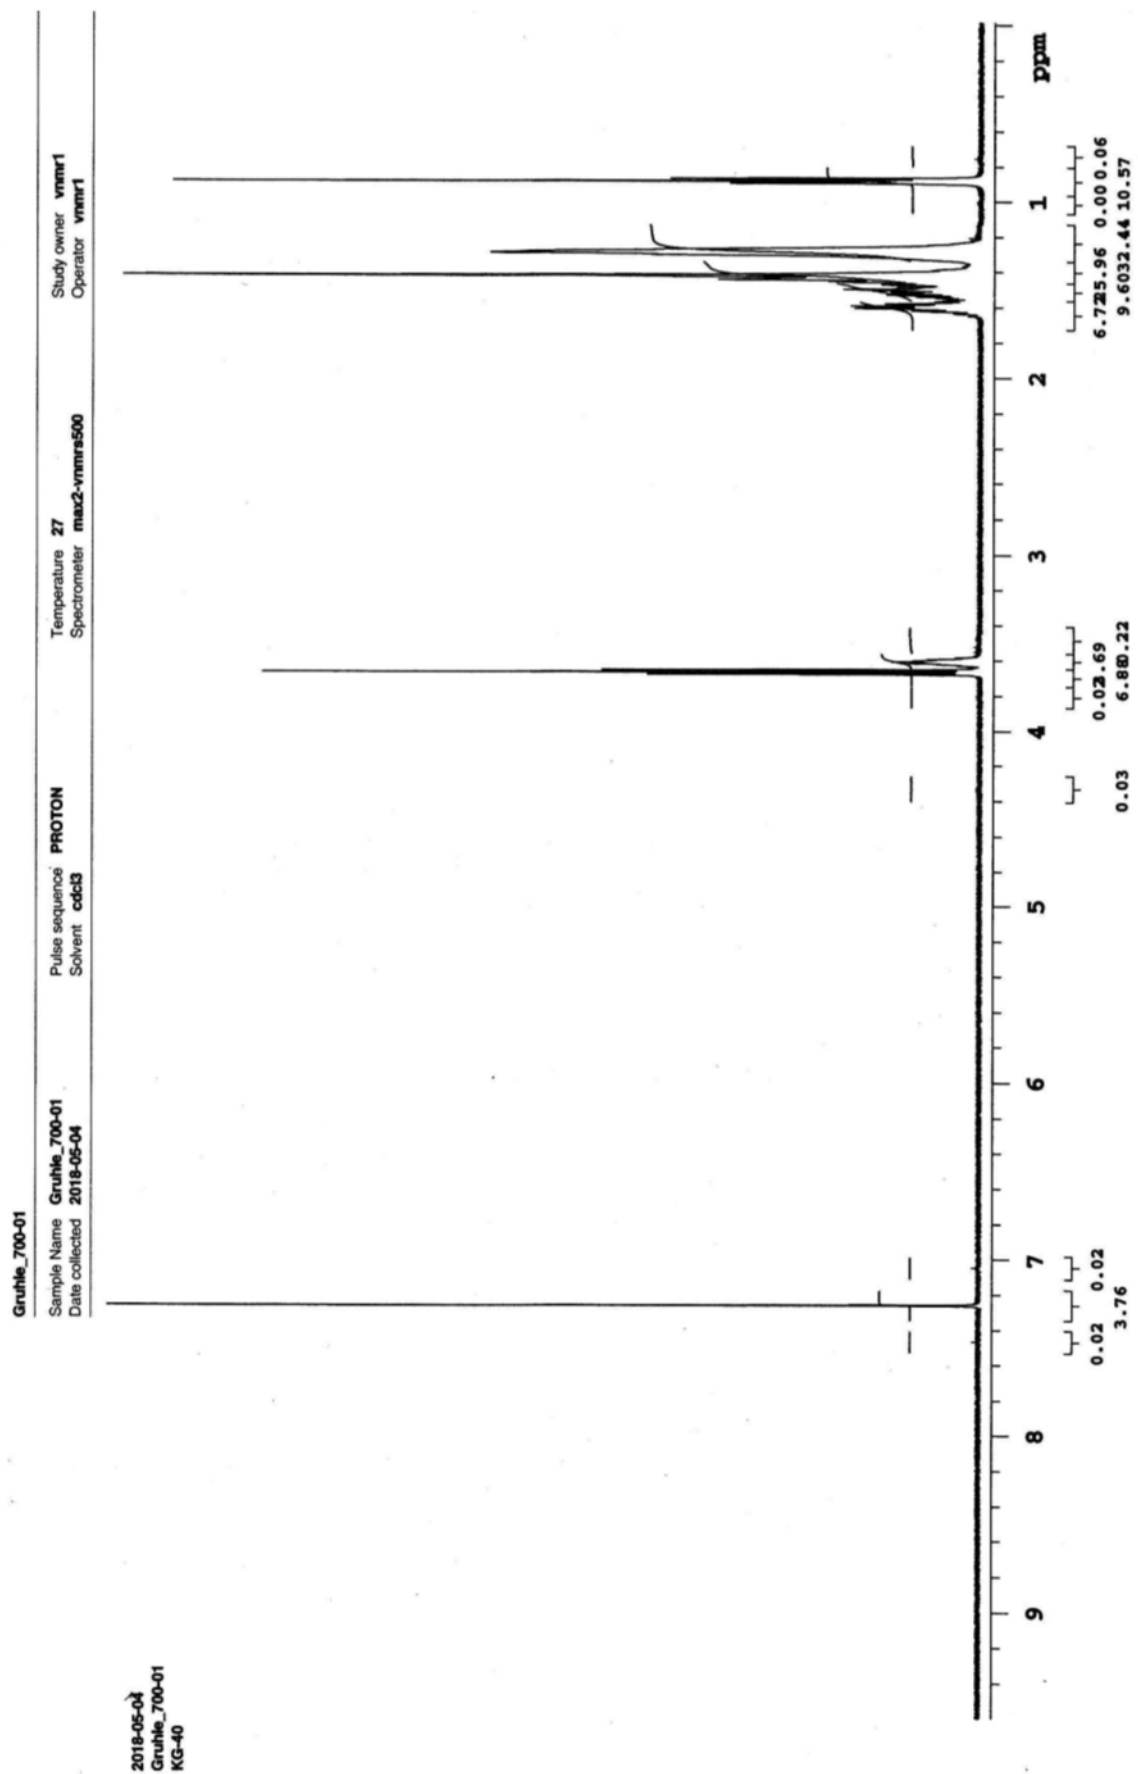

# Organic & Biomolecular Chemistry

Compound 3c –  $^{13}\text{C}$  NMR

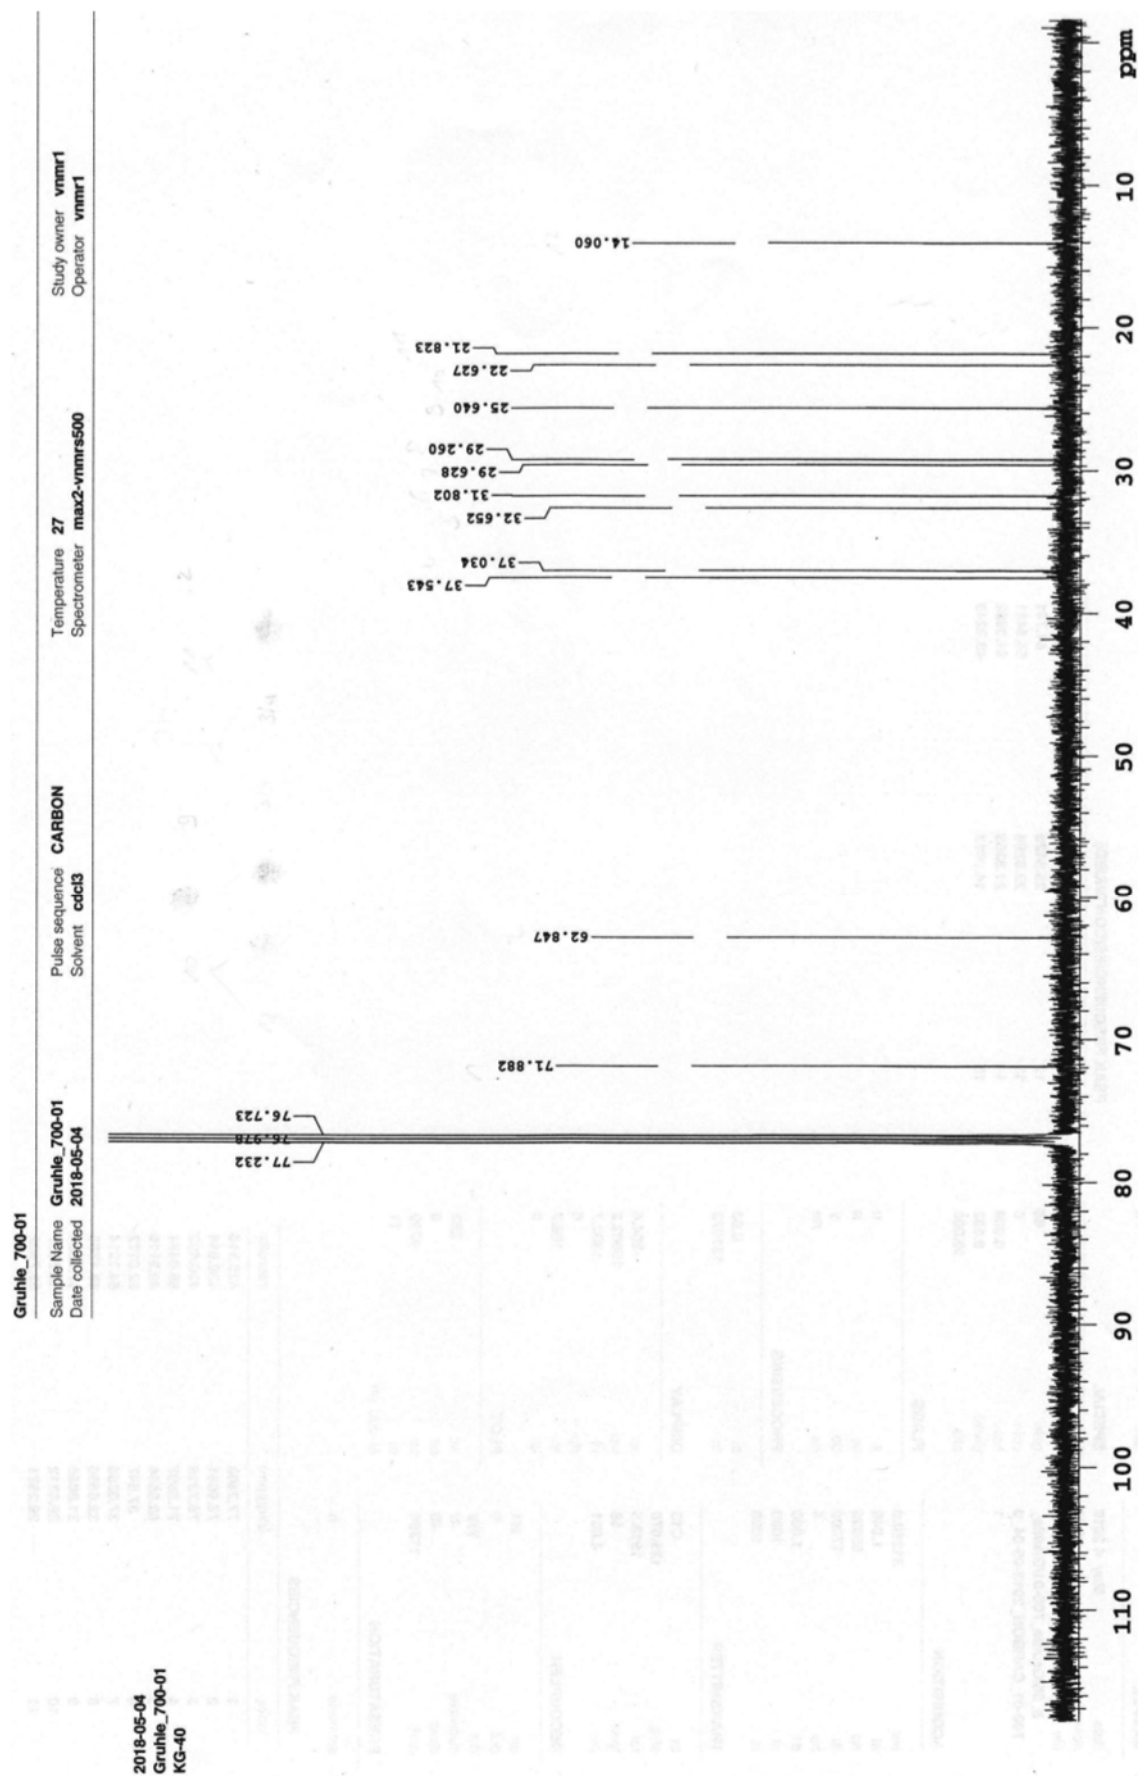

# Organic & Biomolecular Chemistry

Compound **4a** – APCI-MS (positive mode)

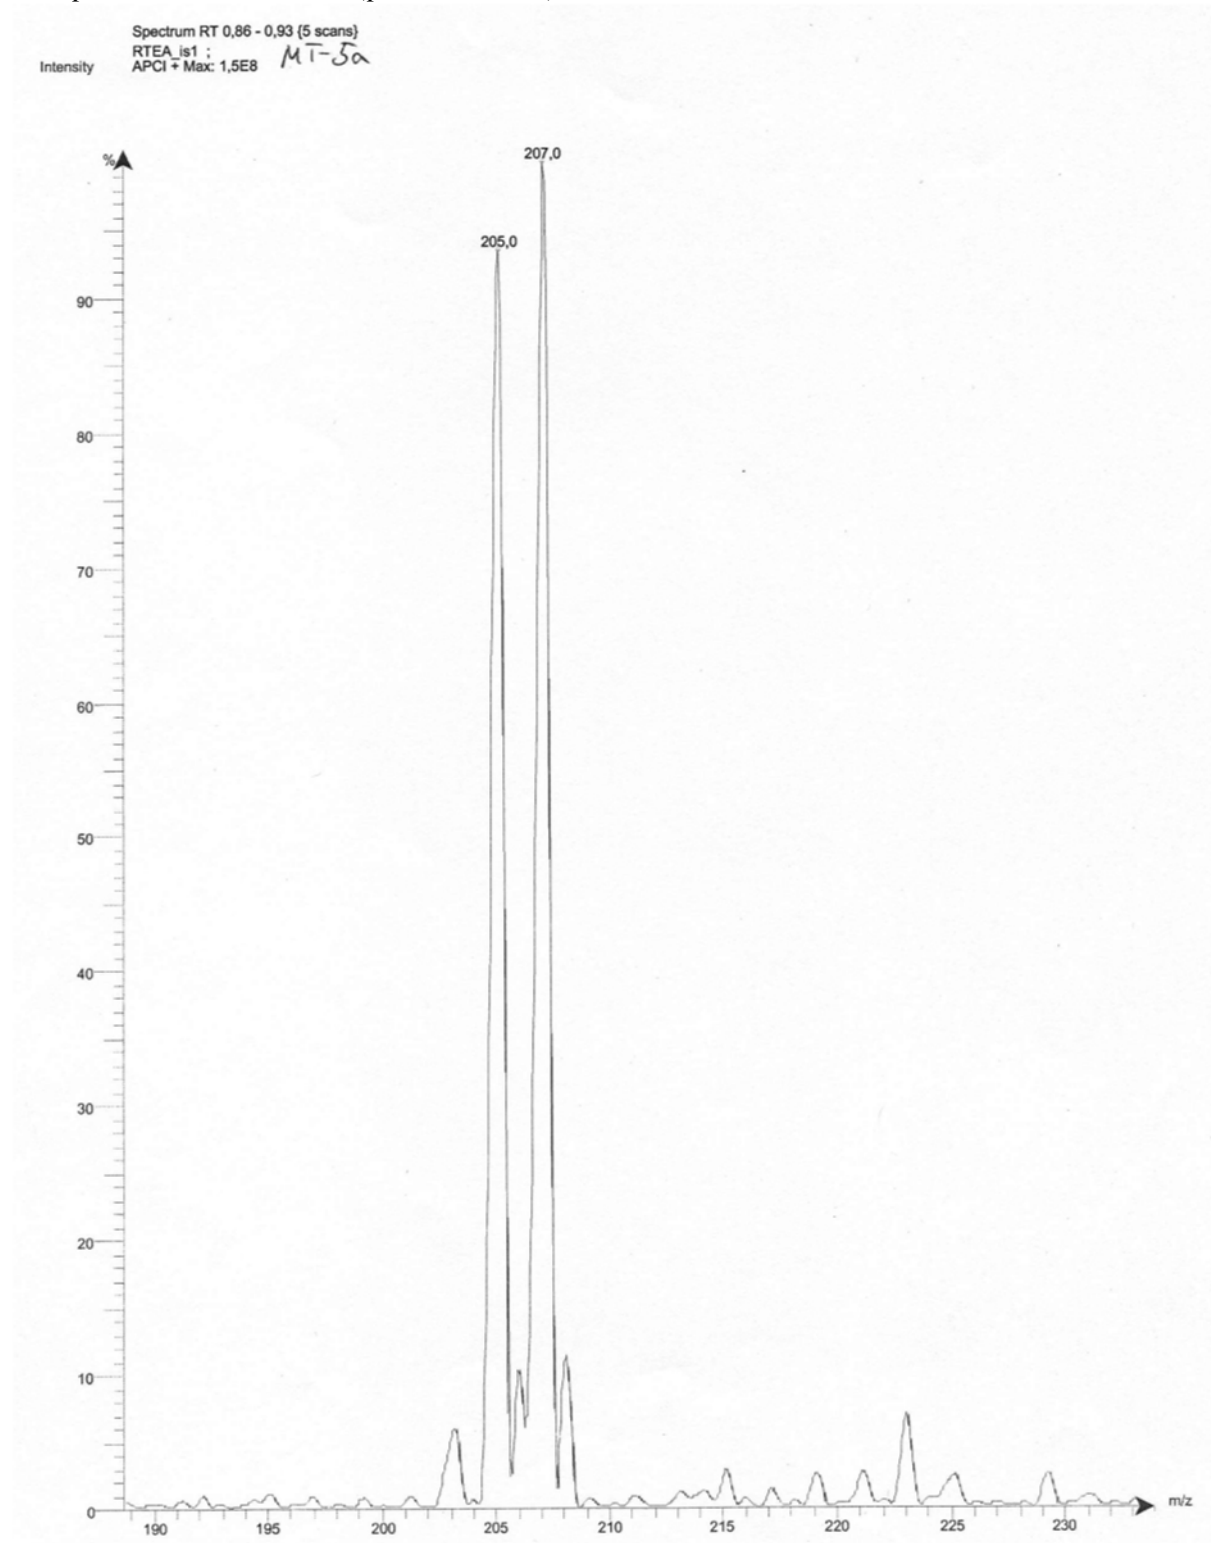

# Organic & Biomolecular Chemistry

## Compound 4a - $^1\text{H}$ NMR

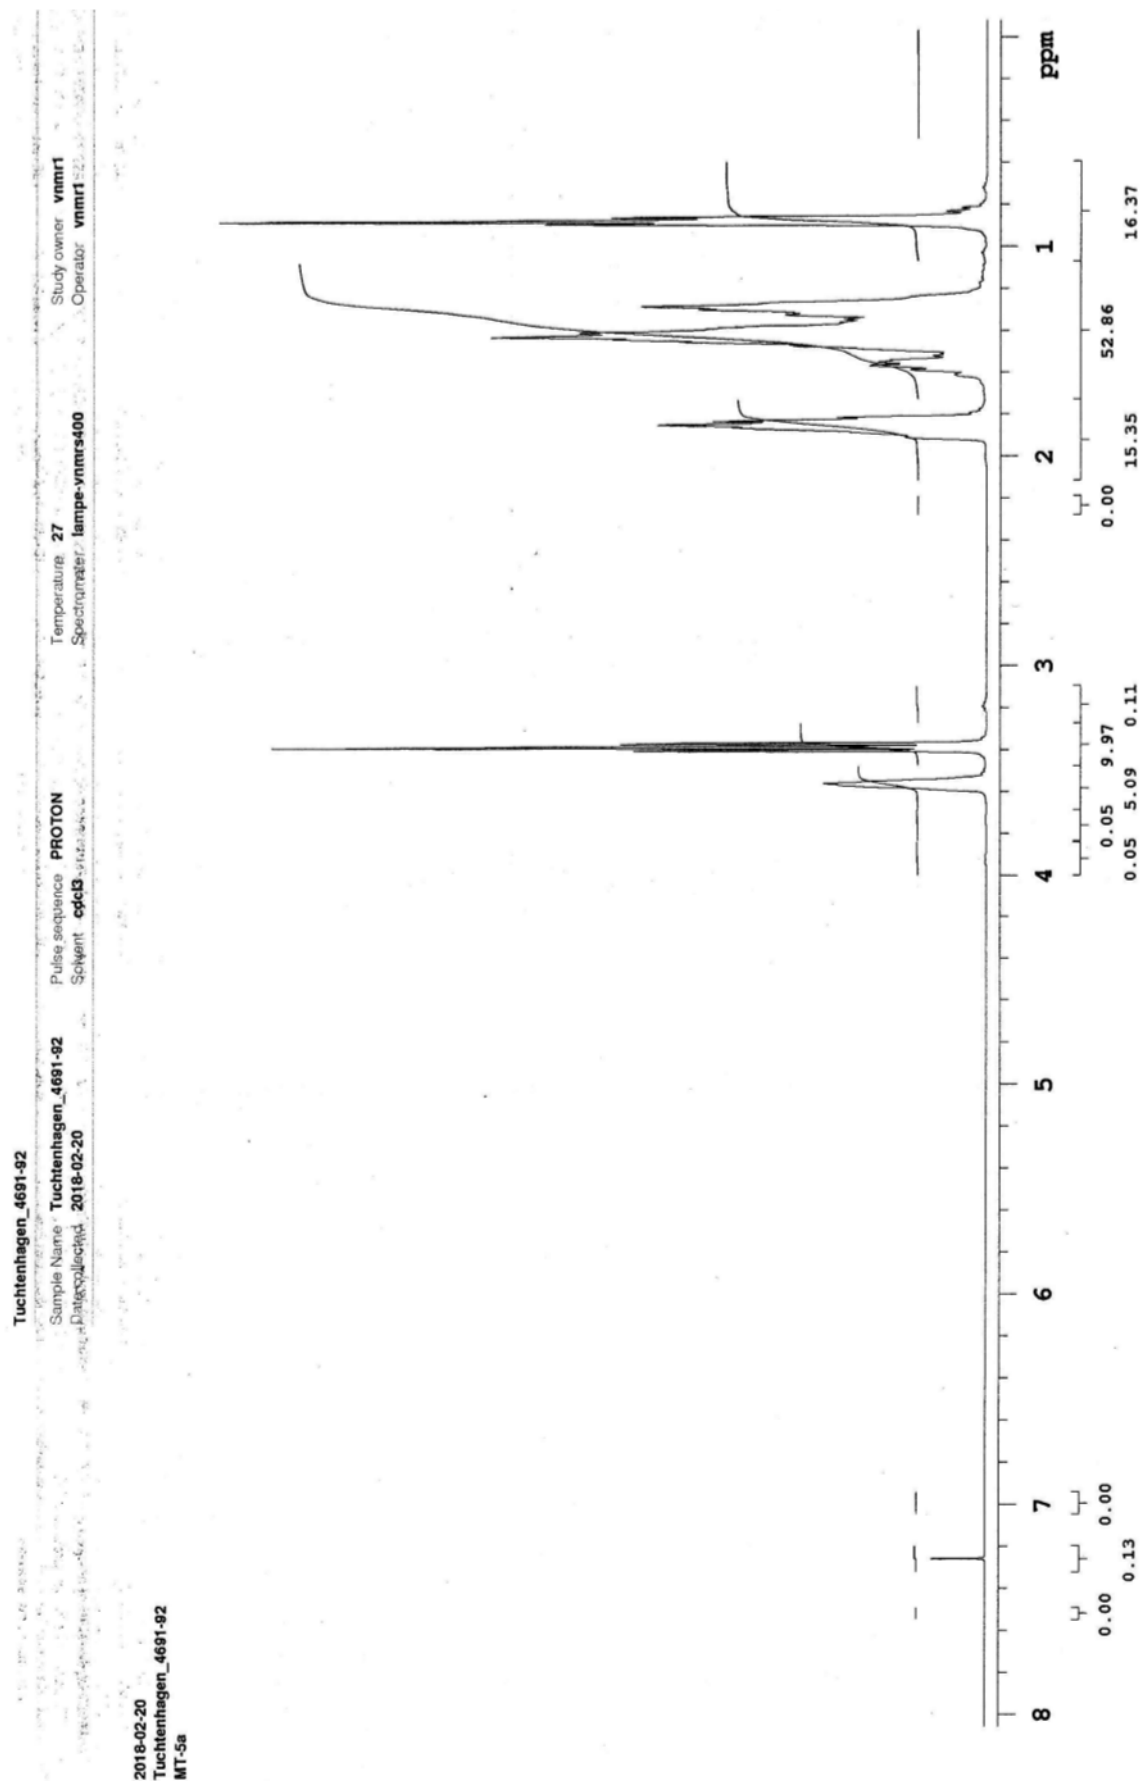

# Organic & Biomolecular Chemistry

Compound **4a** –  $^{13}\text{C}$  NMR

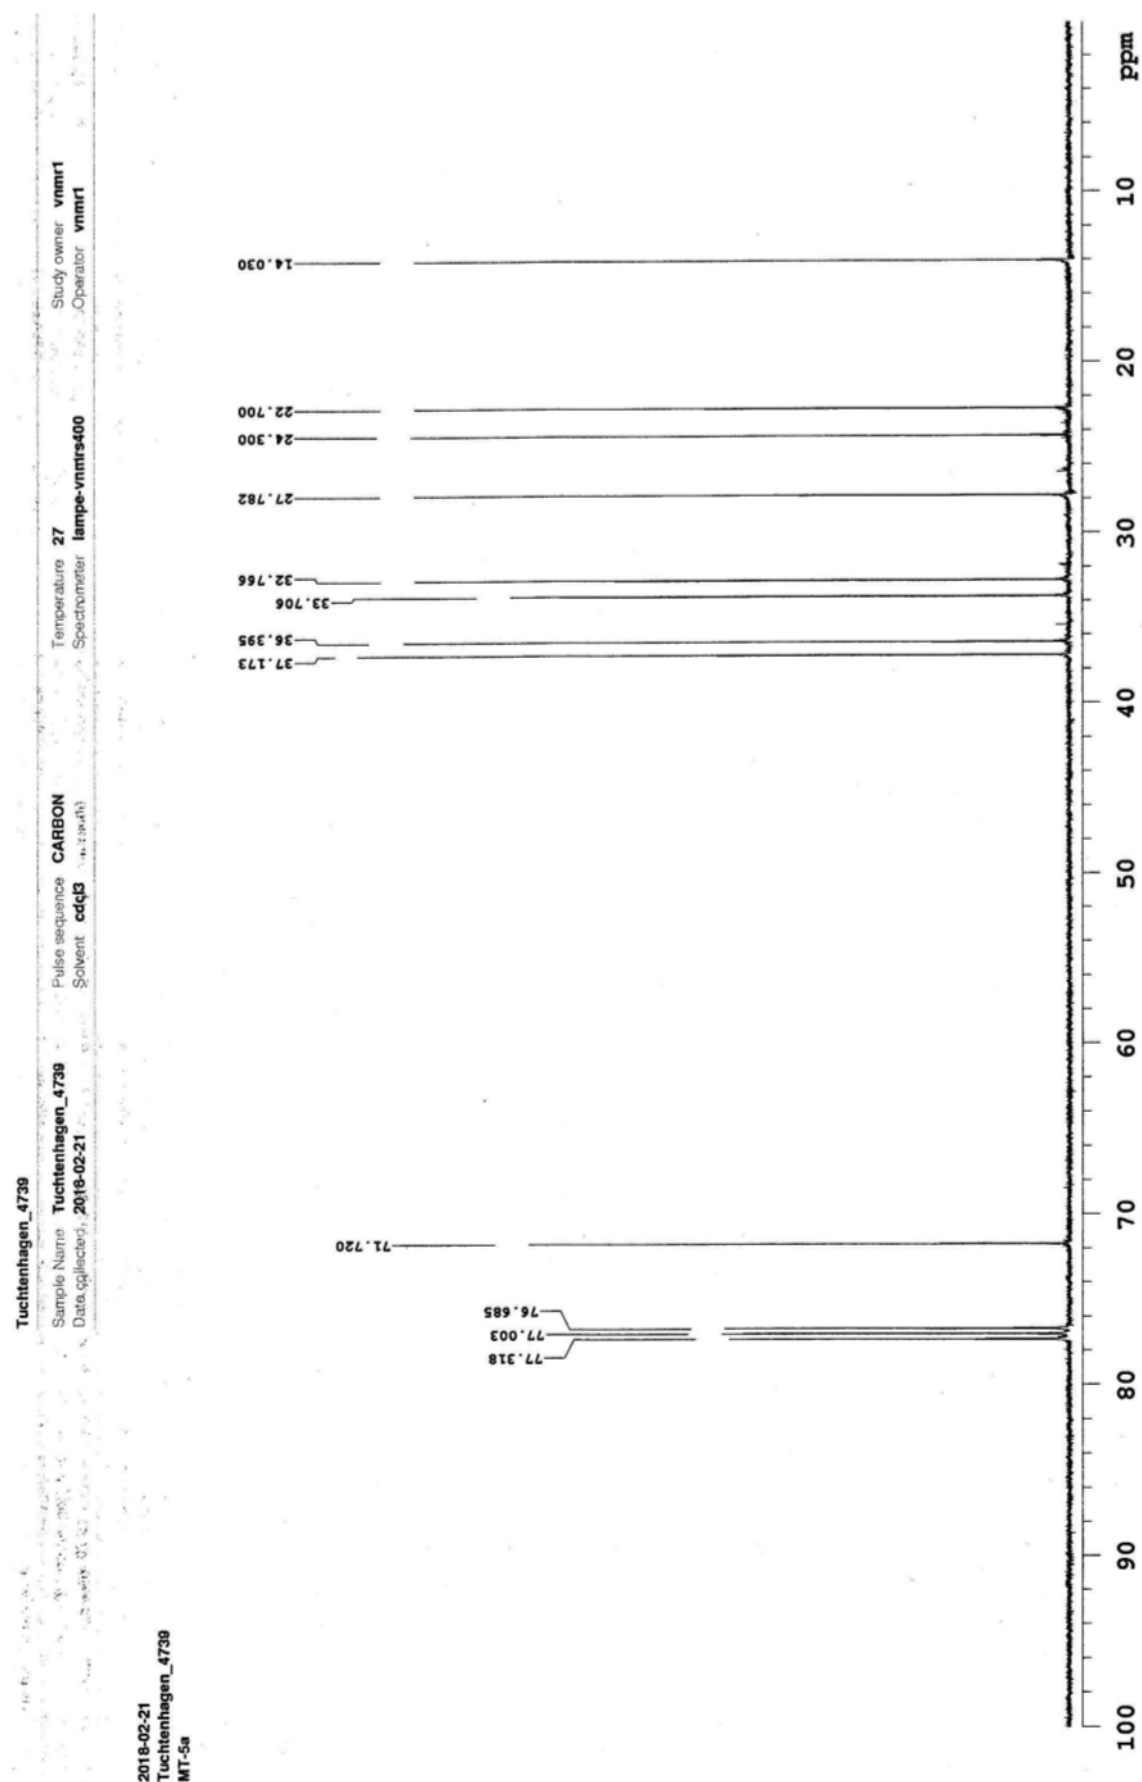



# Organic & Biomolecular Chemistry

Compound **4b** – APCI-MS (positive mode)

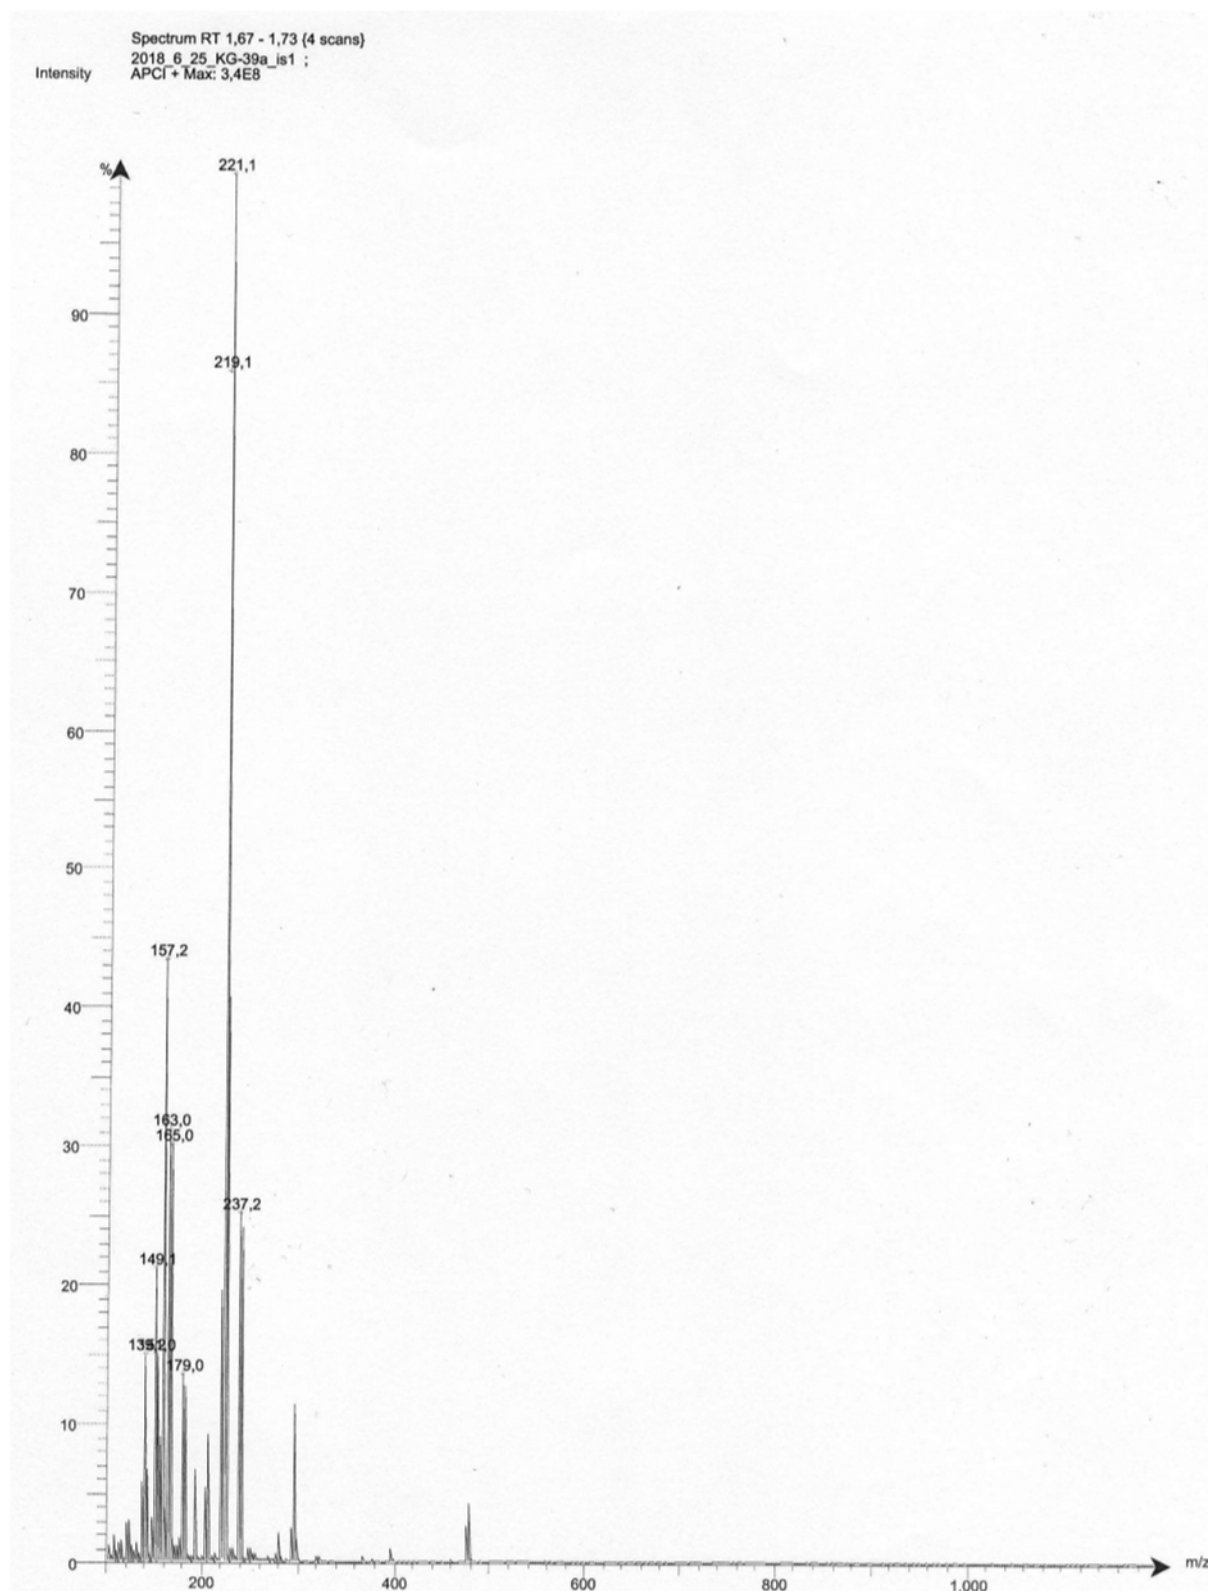

# Organic & Biomolecular Chemistry

Compound **4b** –  $^1\text{H}$  NMR

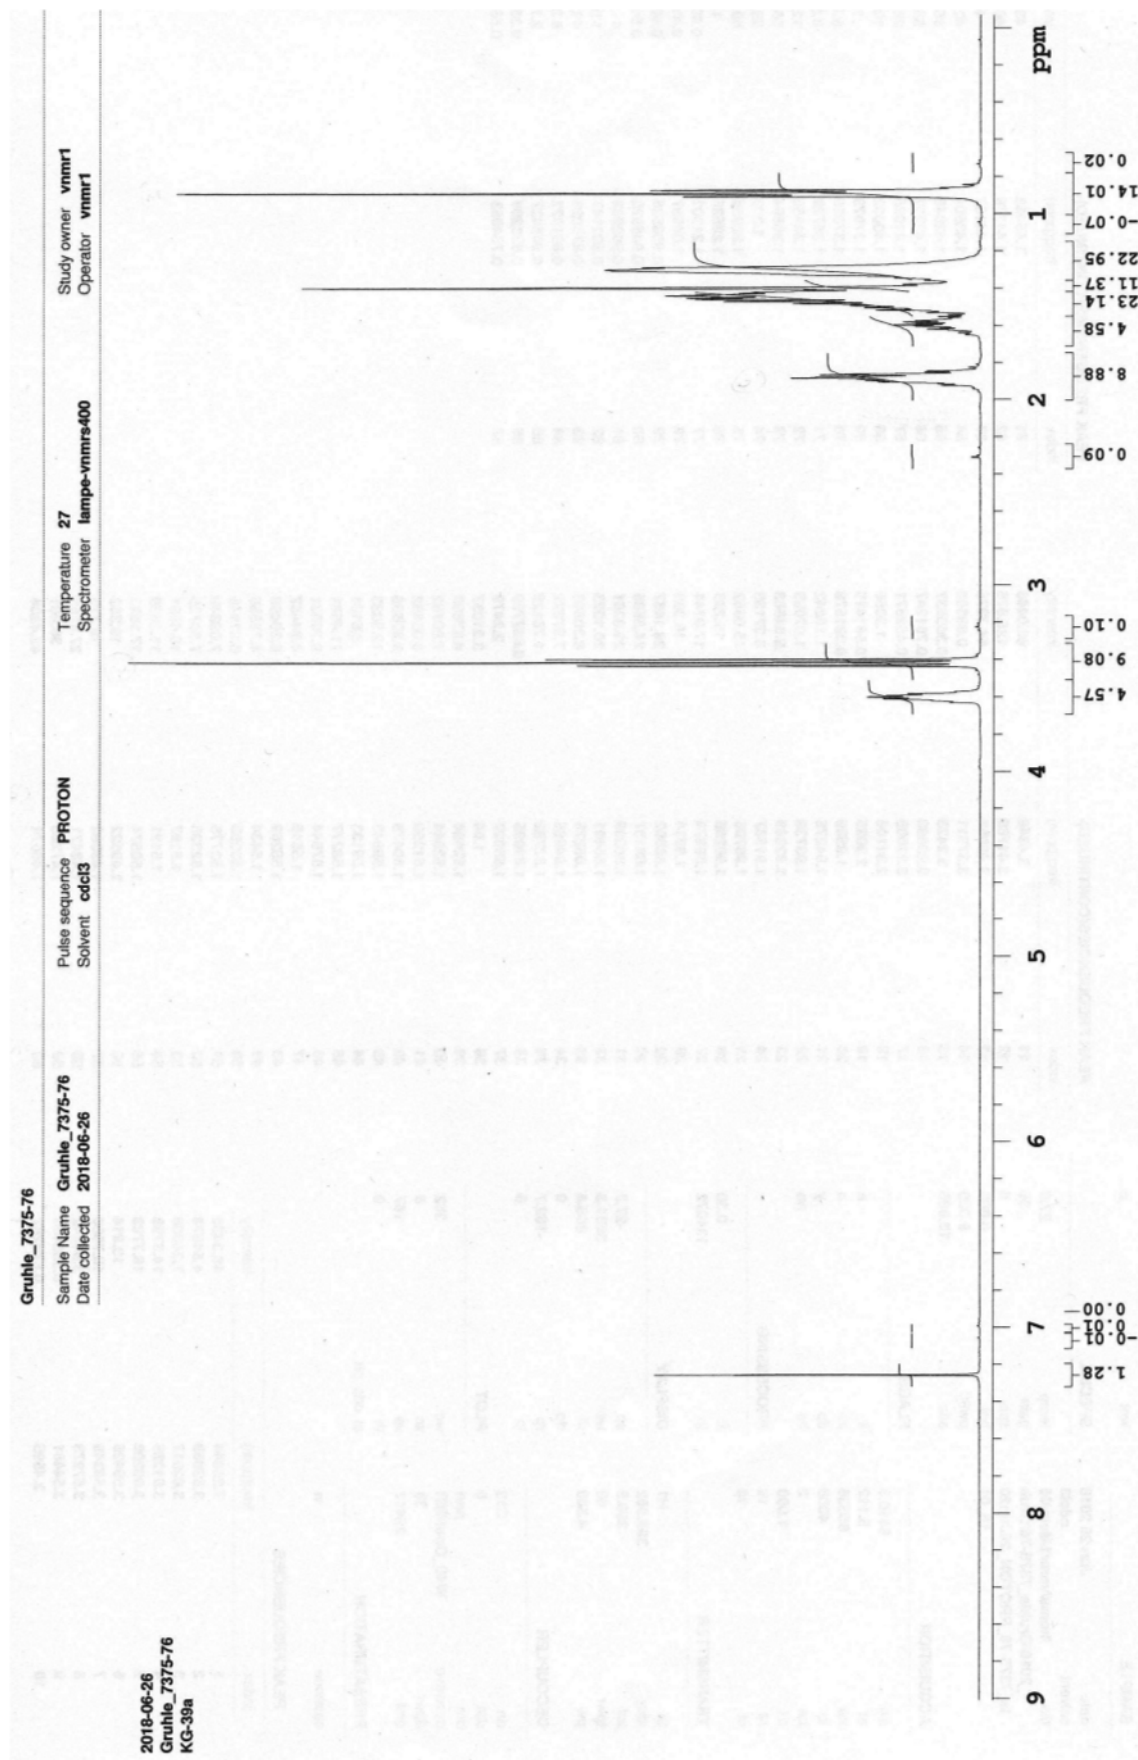

# Organic & Biomolecular Chemistry

## Compound 4b – $^{13}\text{C}$ NMR

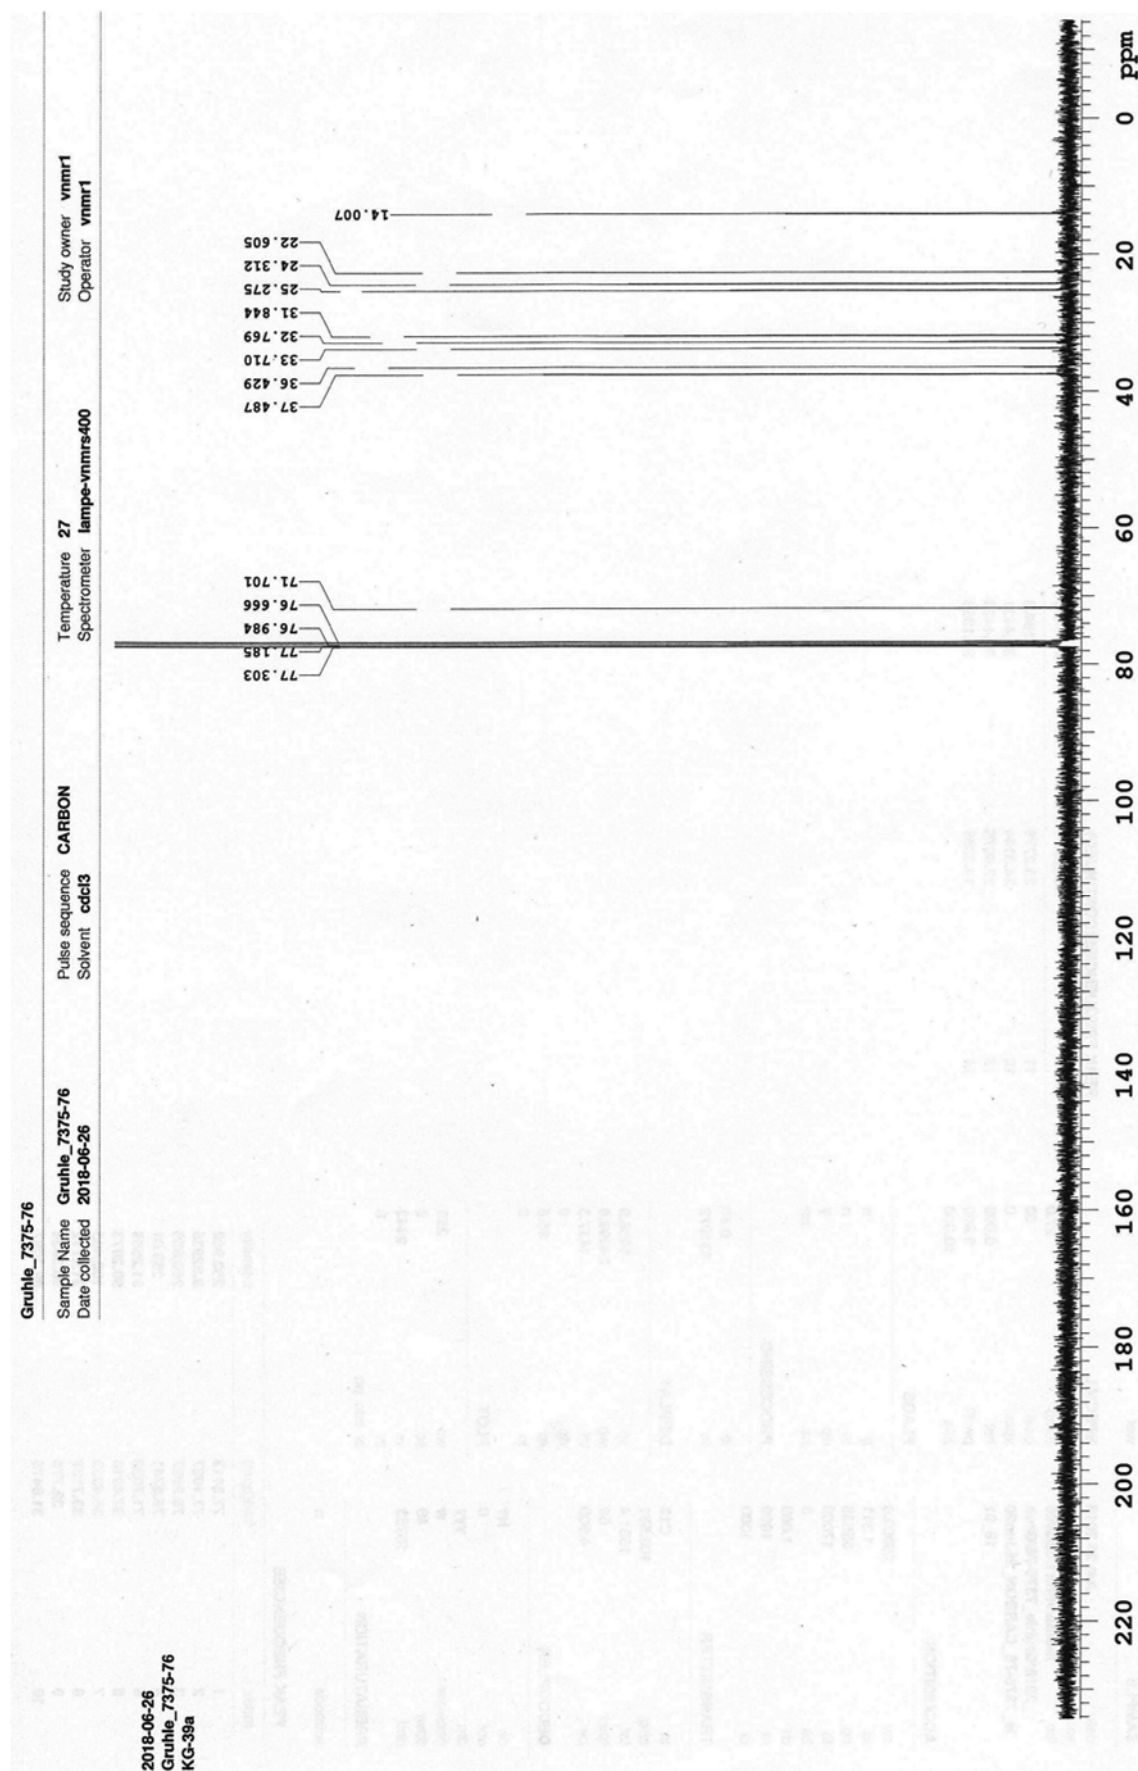

# Organic & Biomolecular Chemistry

Compound **4c** – APCI-MS (positive mode)

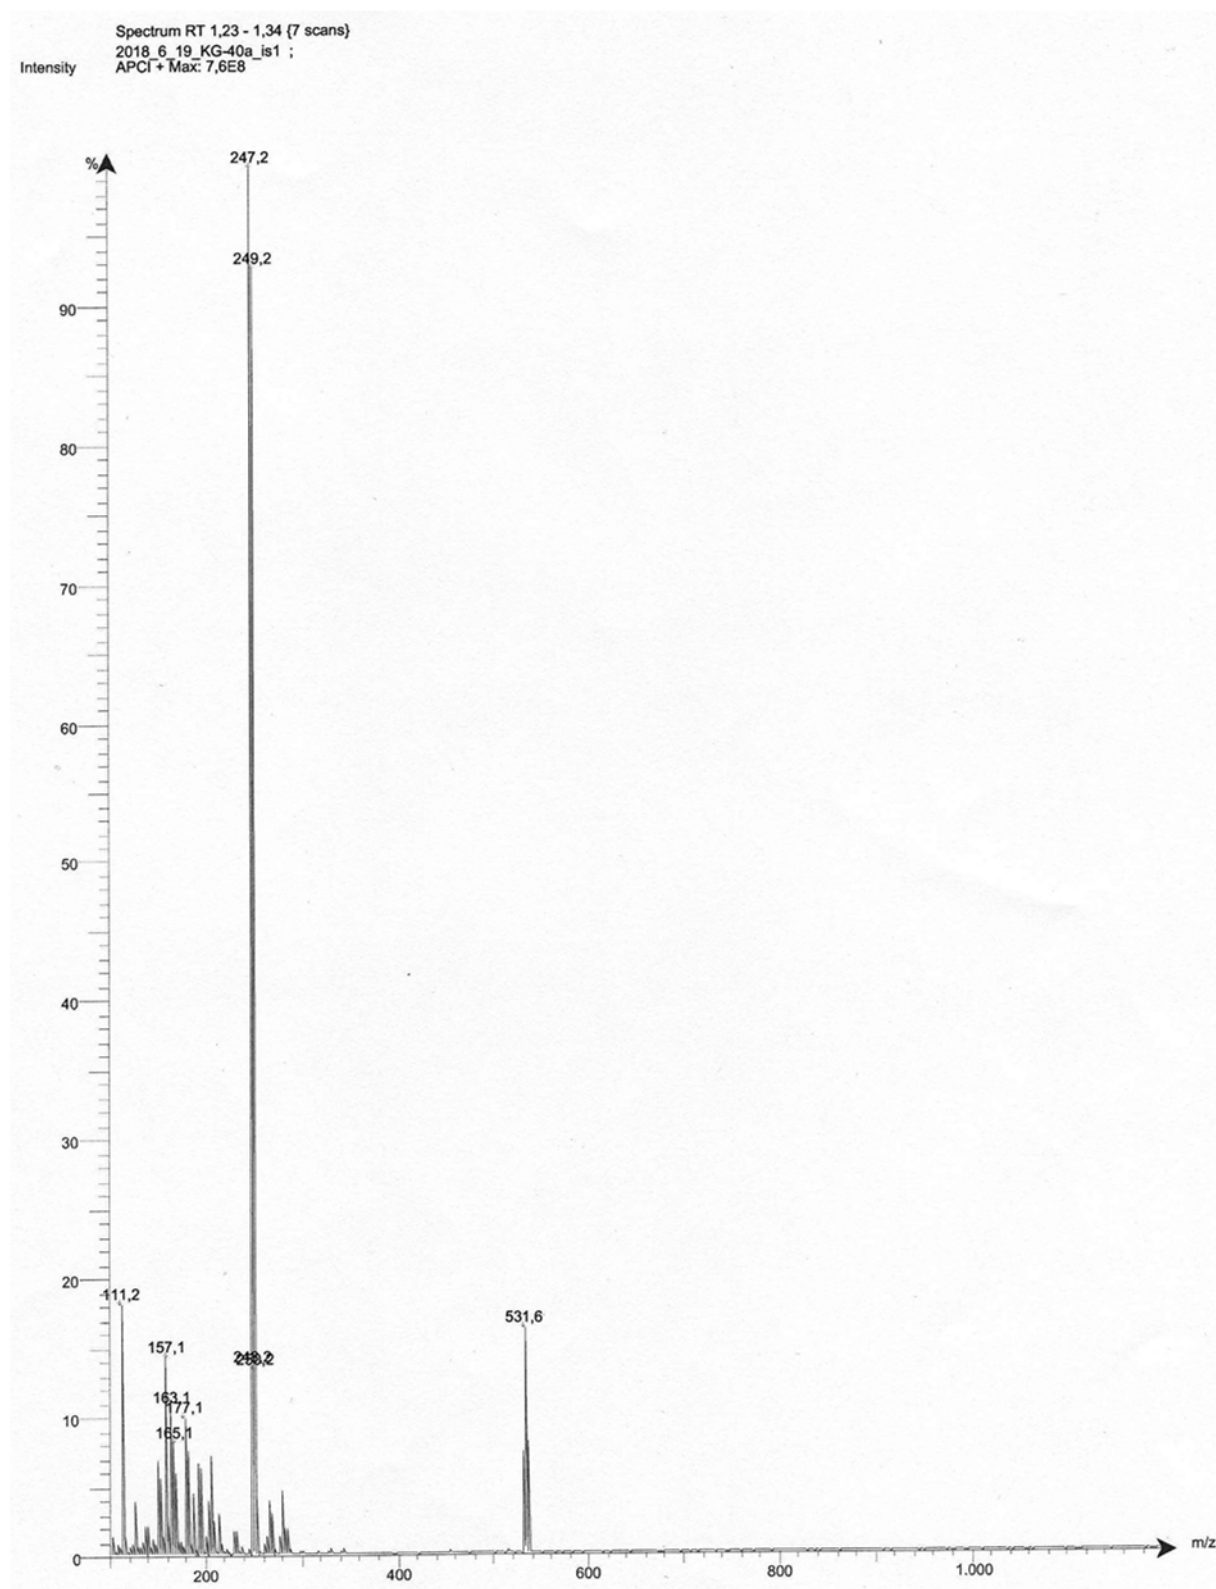

# Organic & Biomolecular Chemistry

## Compound 4c – $^1\text{H}$ NMR

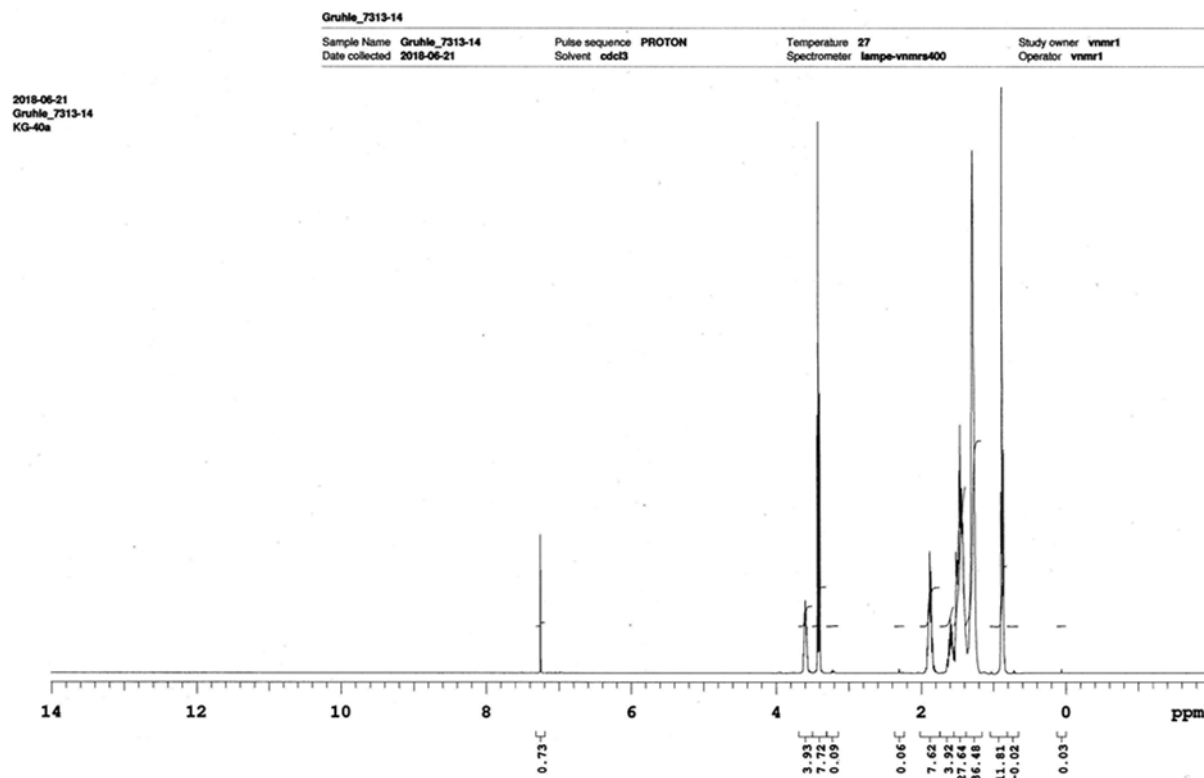

# Organic & Biomolecular Chemistry

Compound **4c** –  $^{13}\text{C}$  NMR

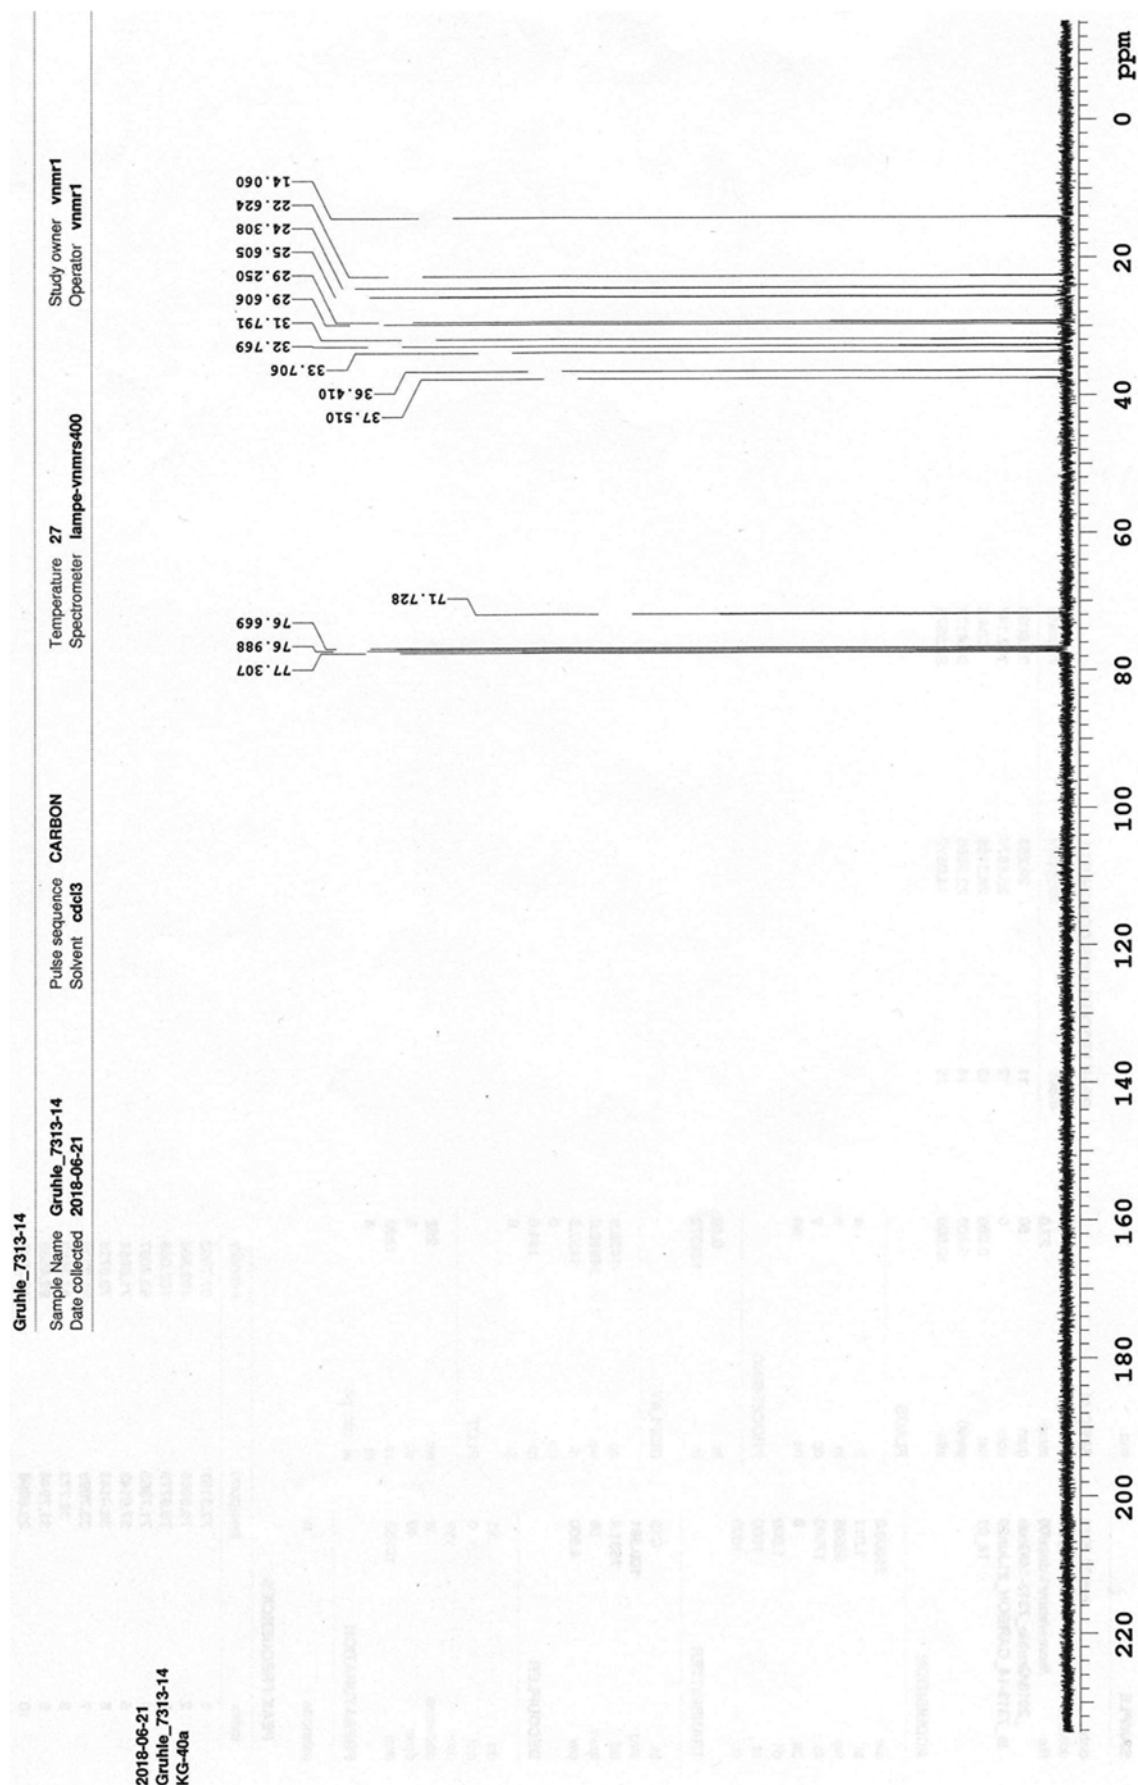

# Organic & Biomolecular Chemistry

Compound **4d** – APCI-MS (positive mode)

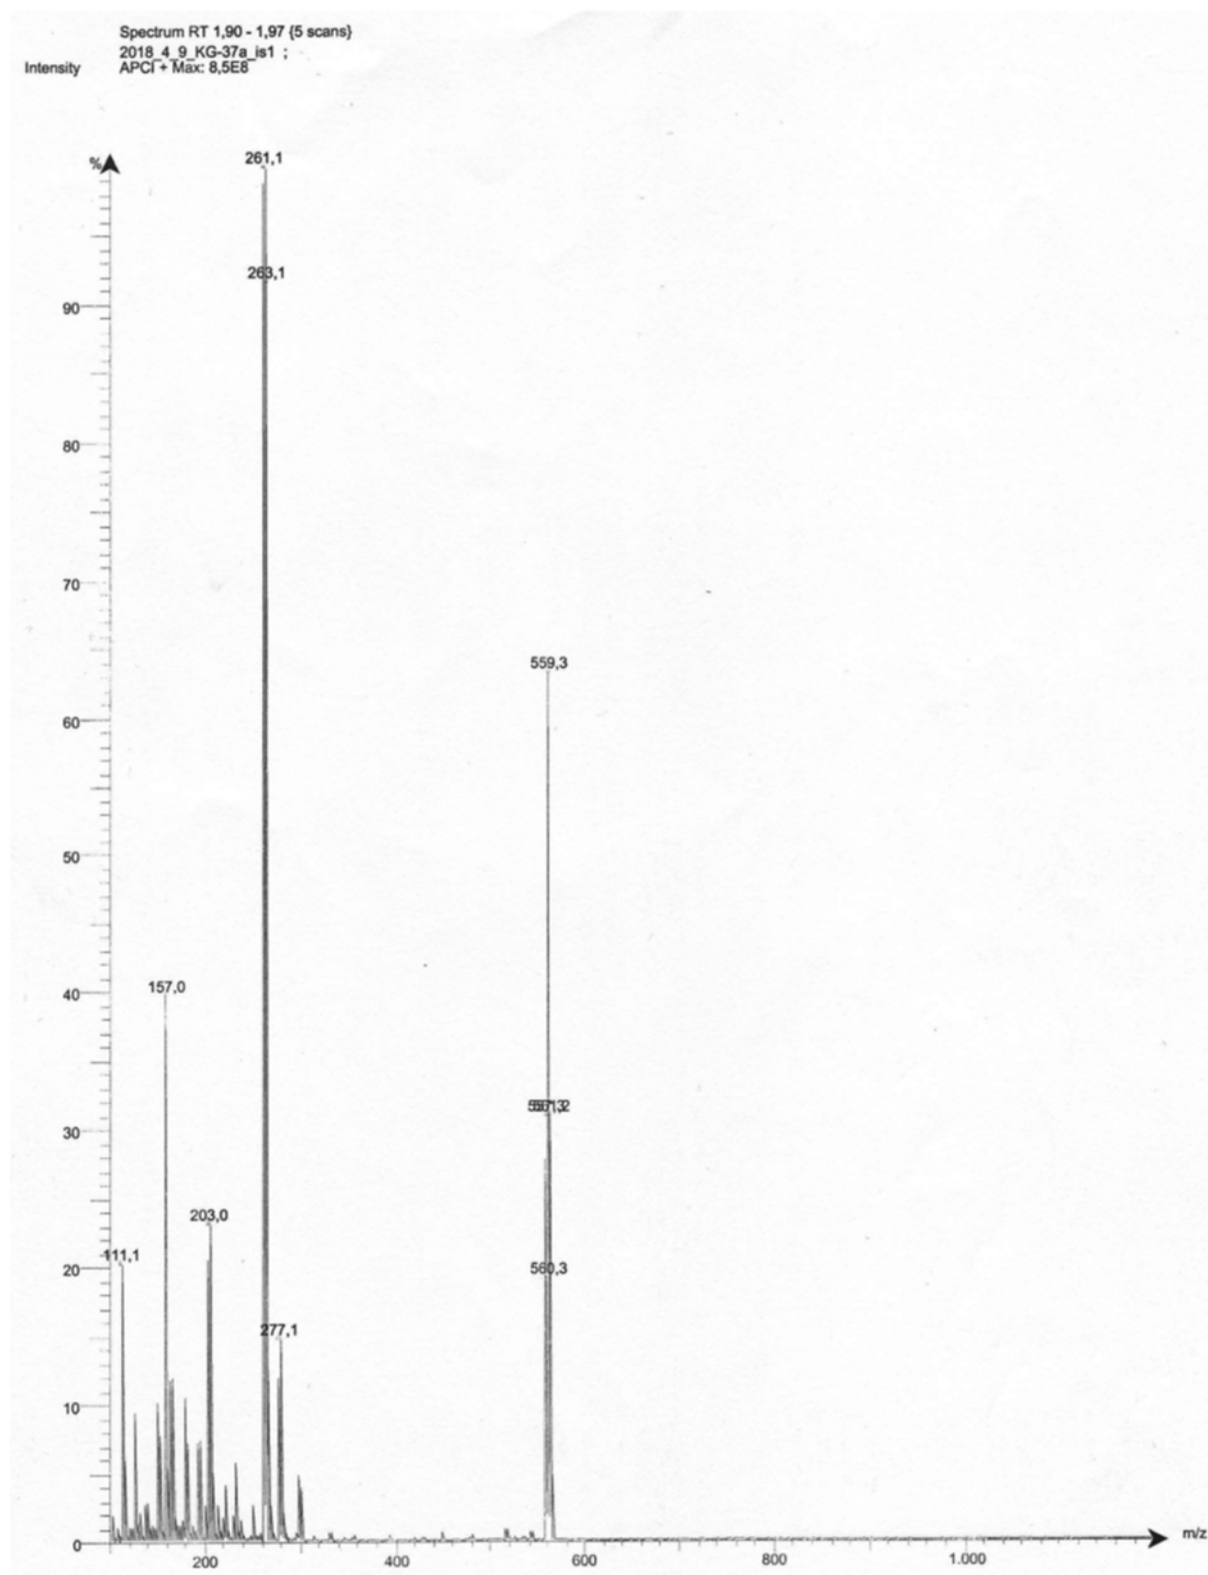

# Organic & Biomolecular Chemistry

Compound **4d** –  $^1\text{H}$  NMR

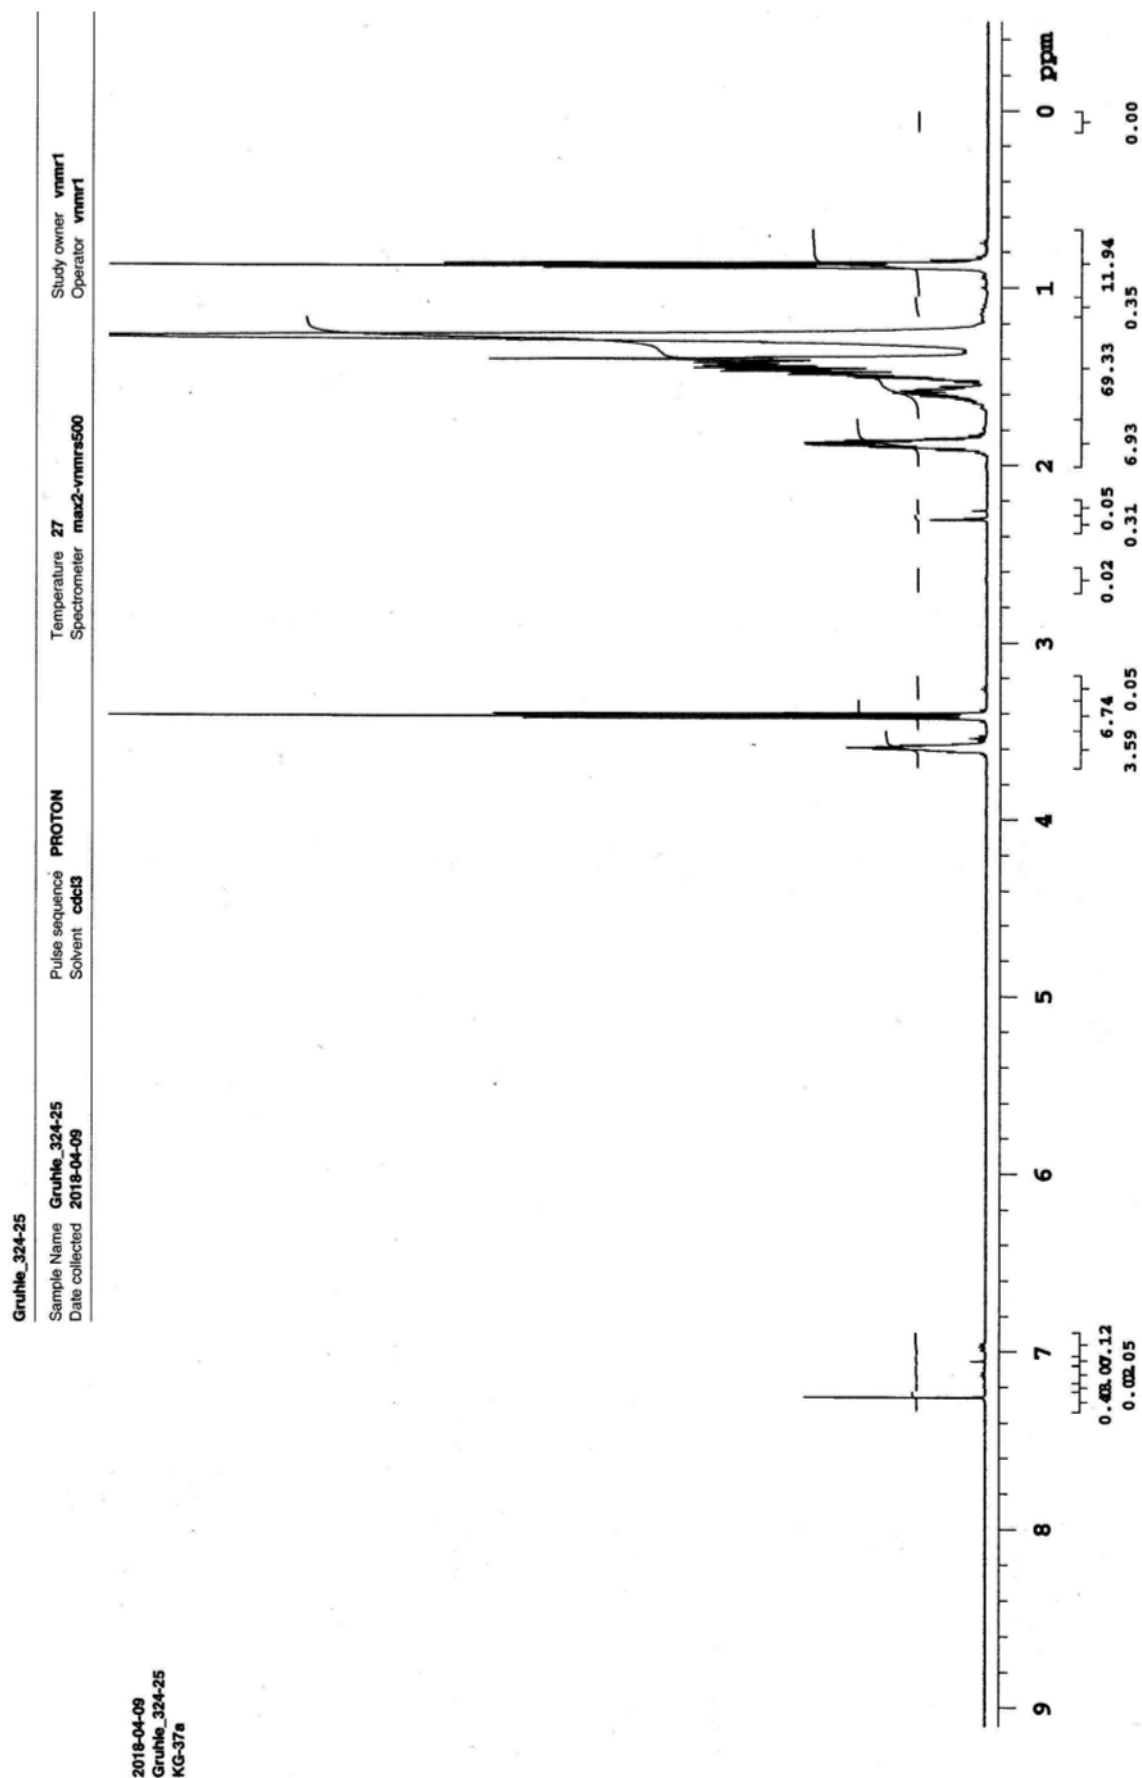



# Organic & Biomolecular Chemistry

Compound **4d** -  $^{13}\text{C}$  NMR

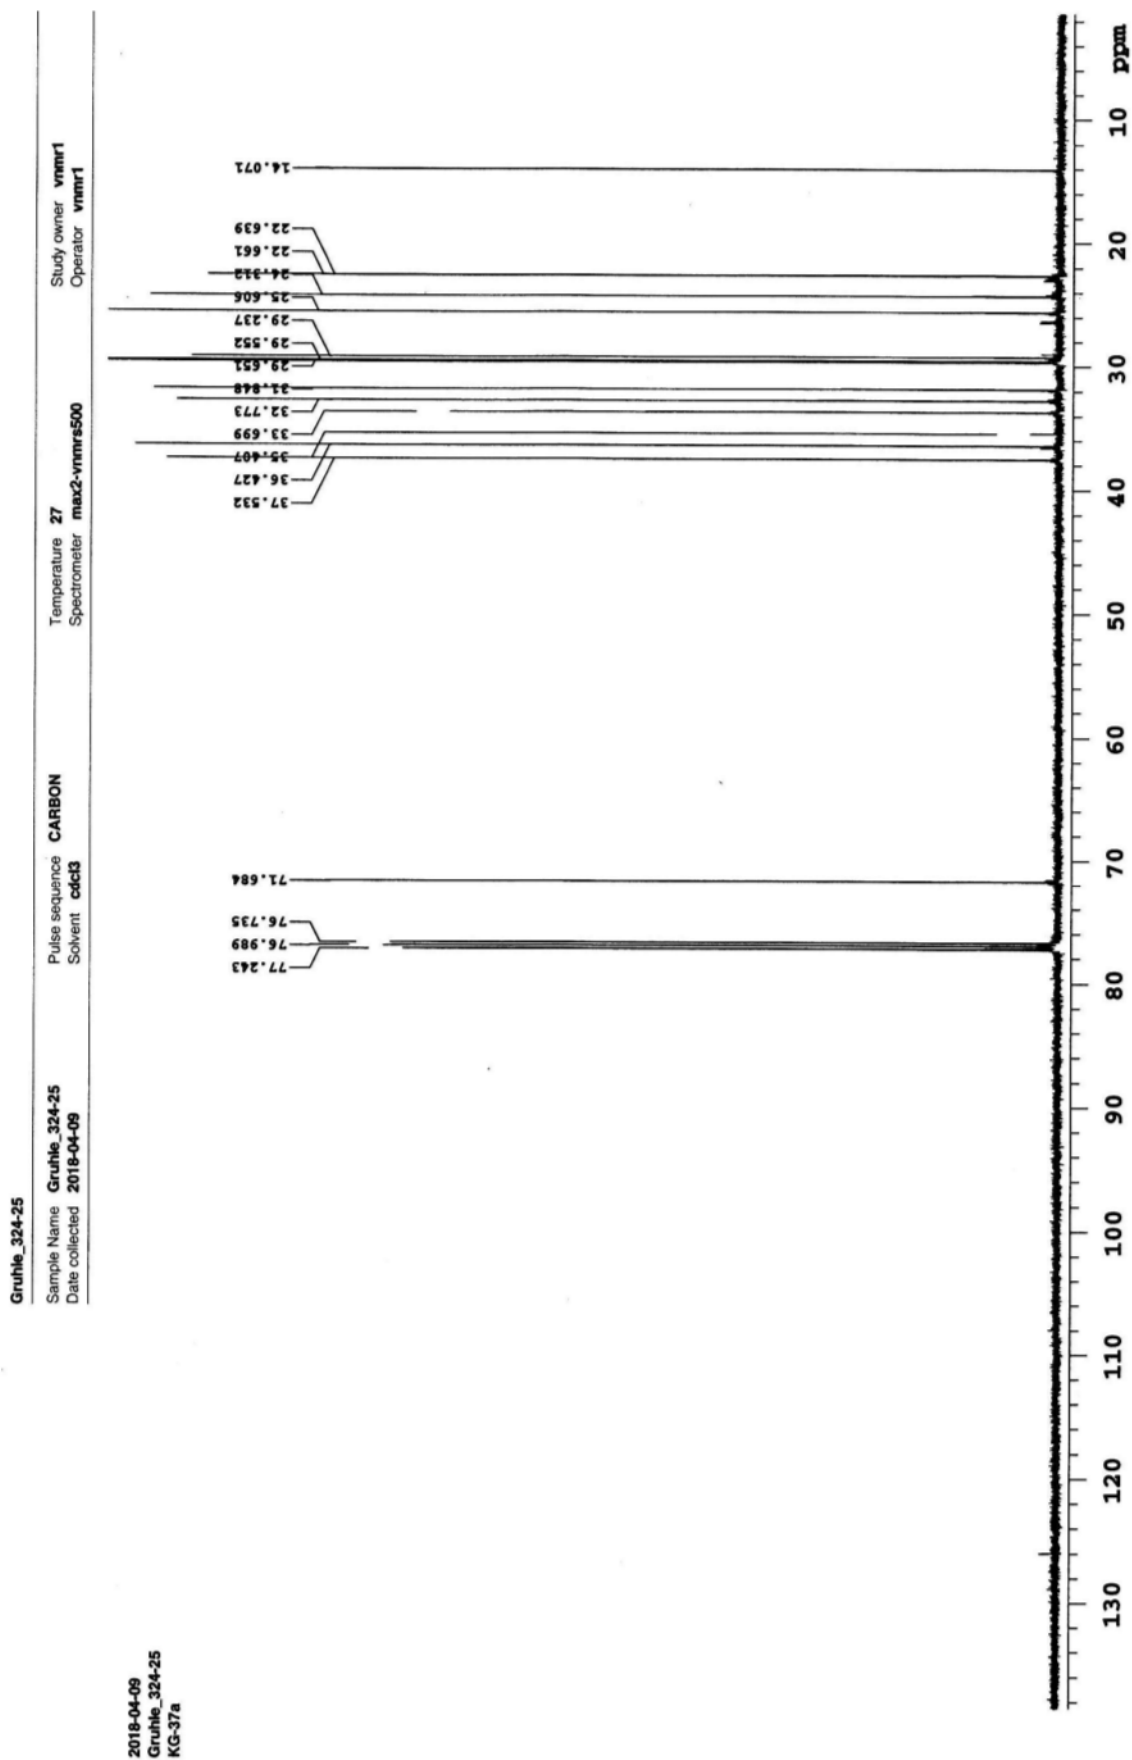

# Organic & Biomolecular Chemistry

Compound **4e** – APCI-MS (positive mode)

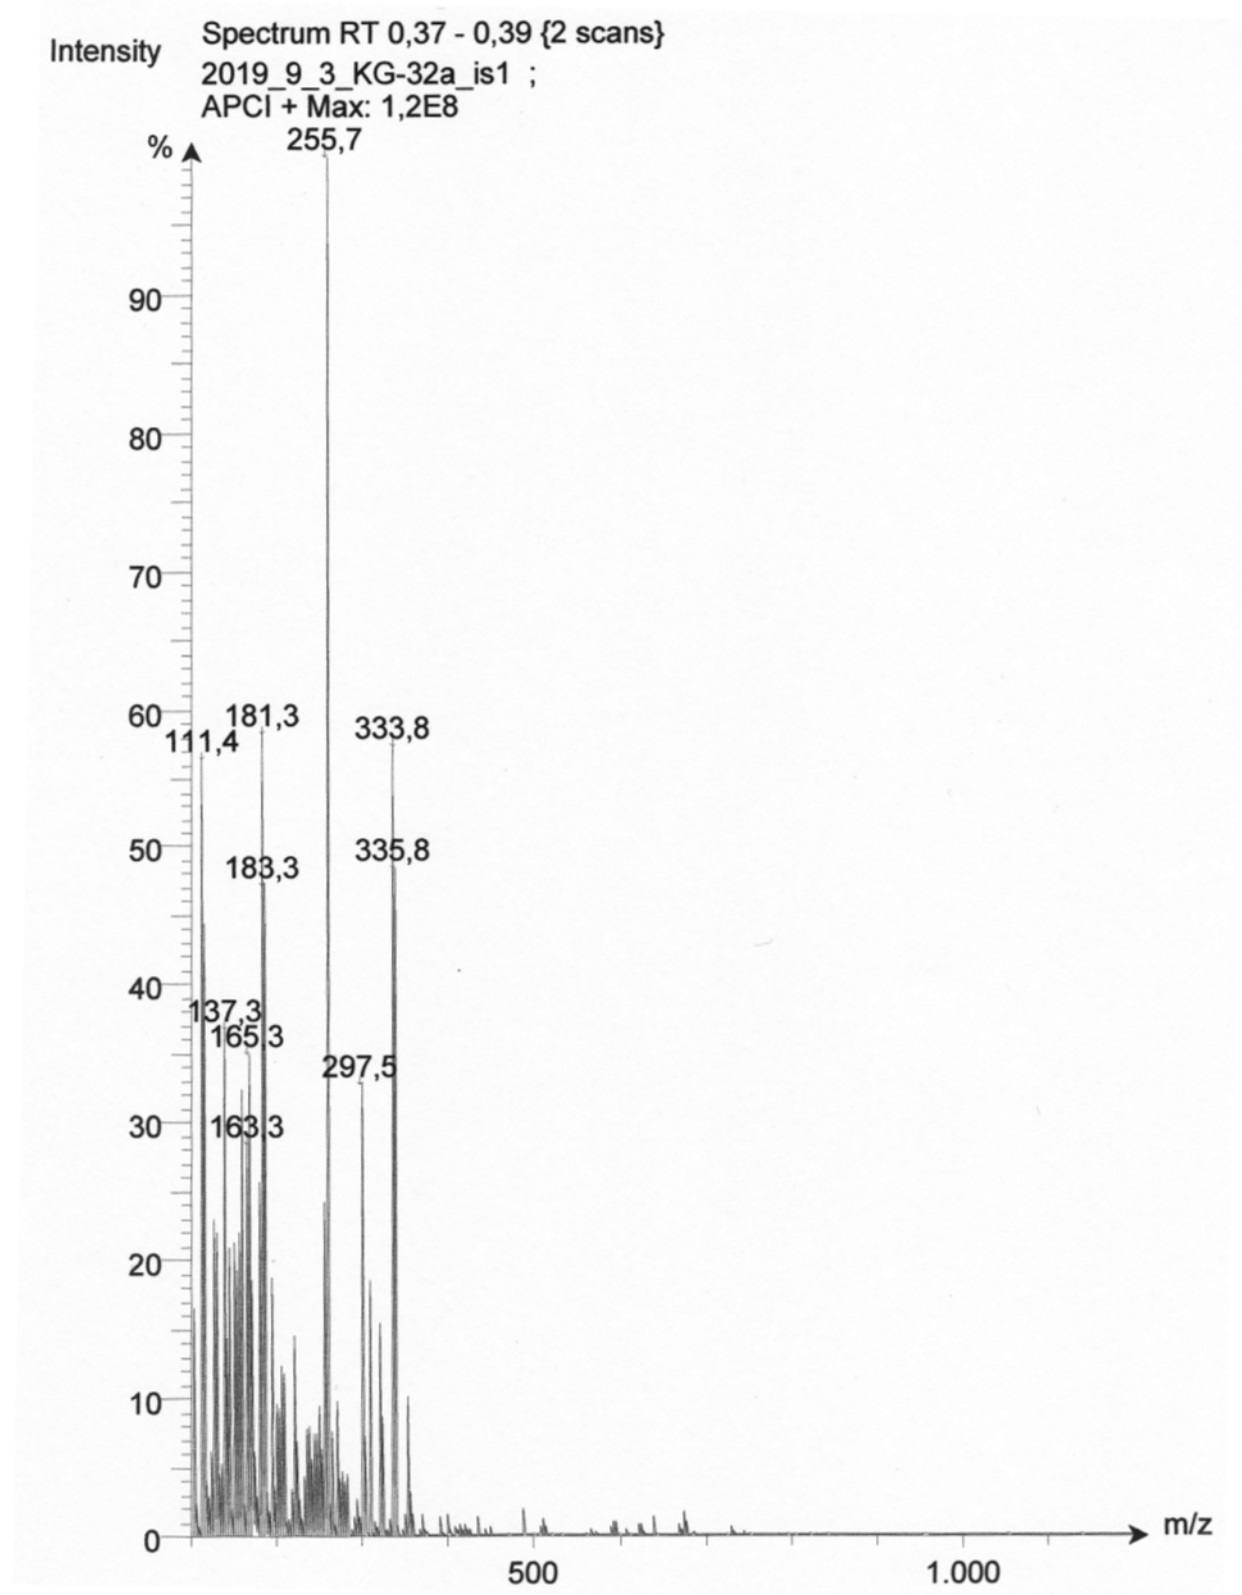

# Organic & Biomolecular Chemistry

Compound **4e** –  $^1\text{H}$  NMR

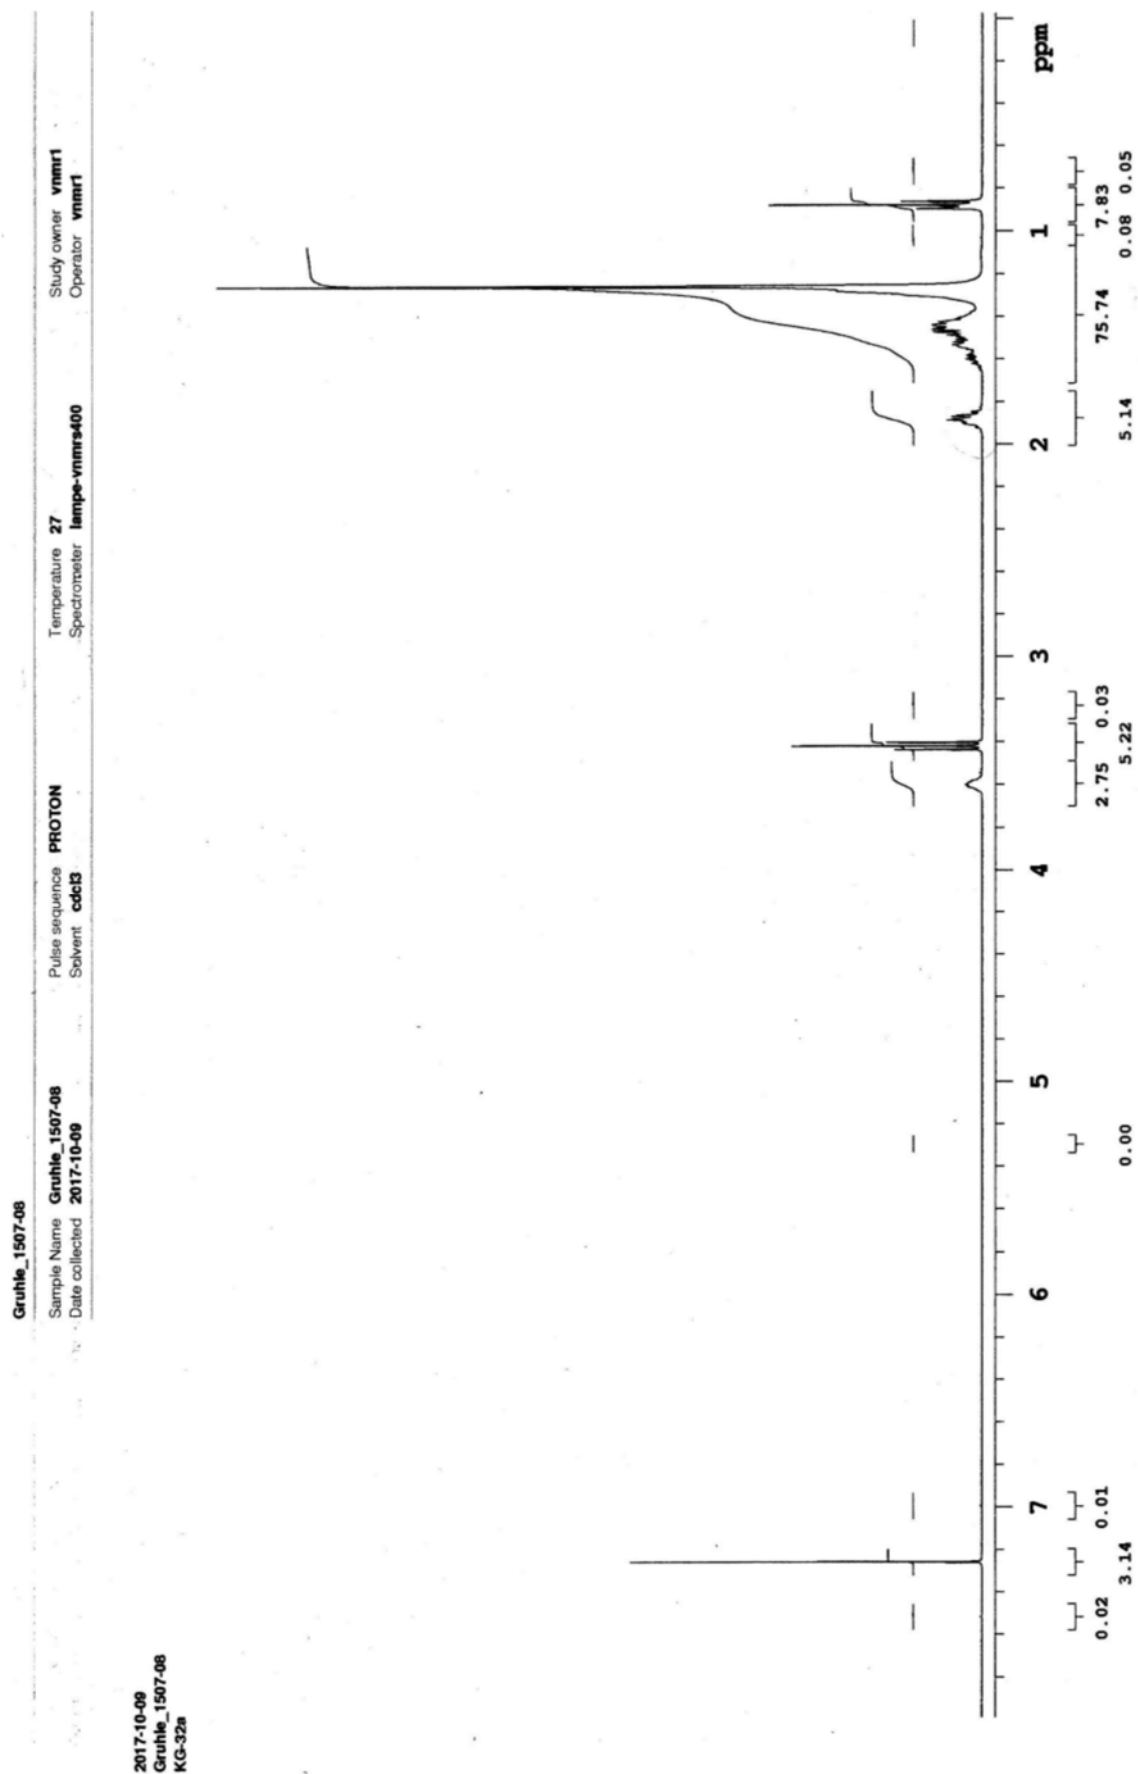

# Organic & Biomolecular Chemistry

## Compound 4e – $^{13}\text{C}$ NMR

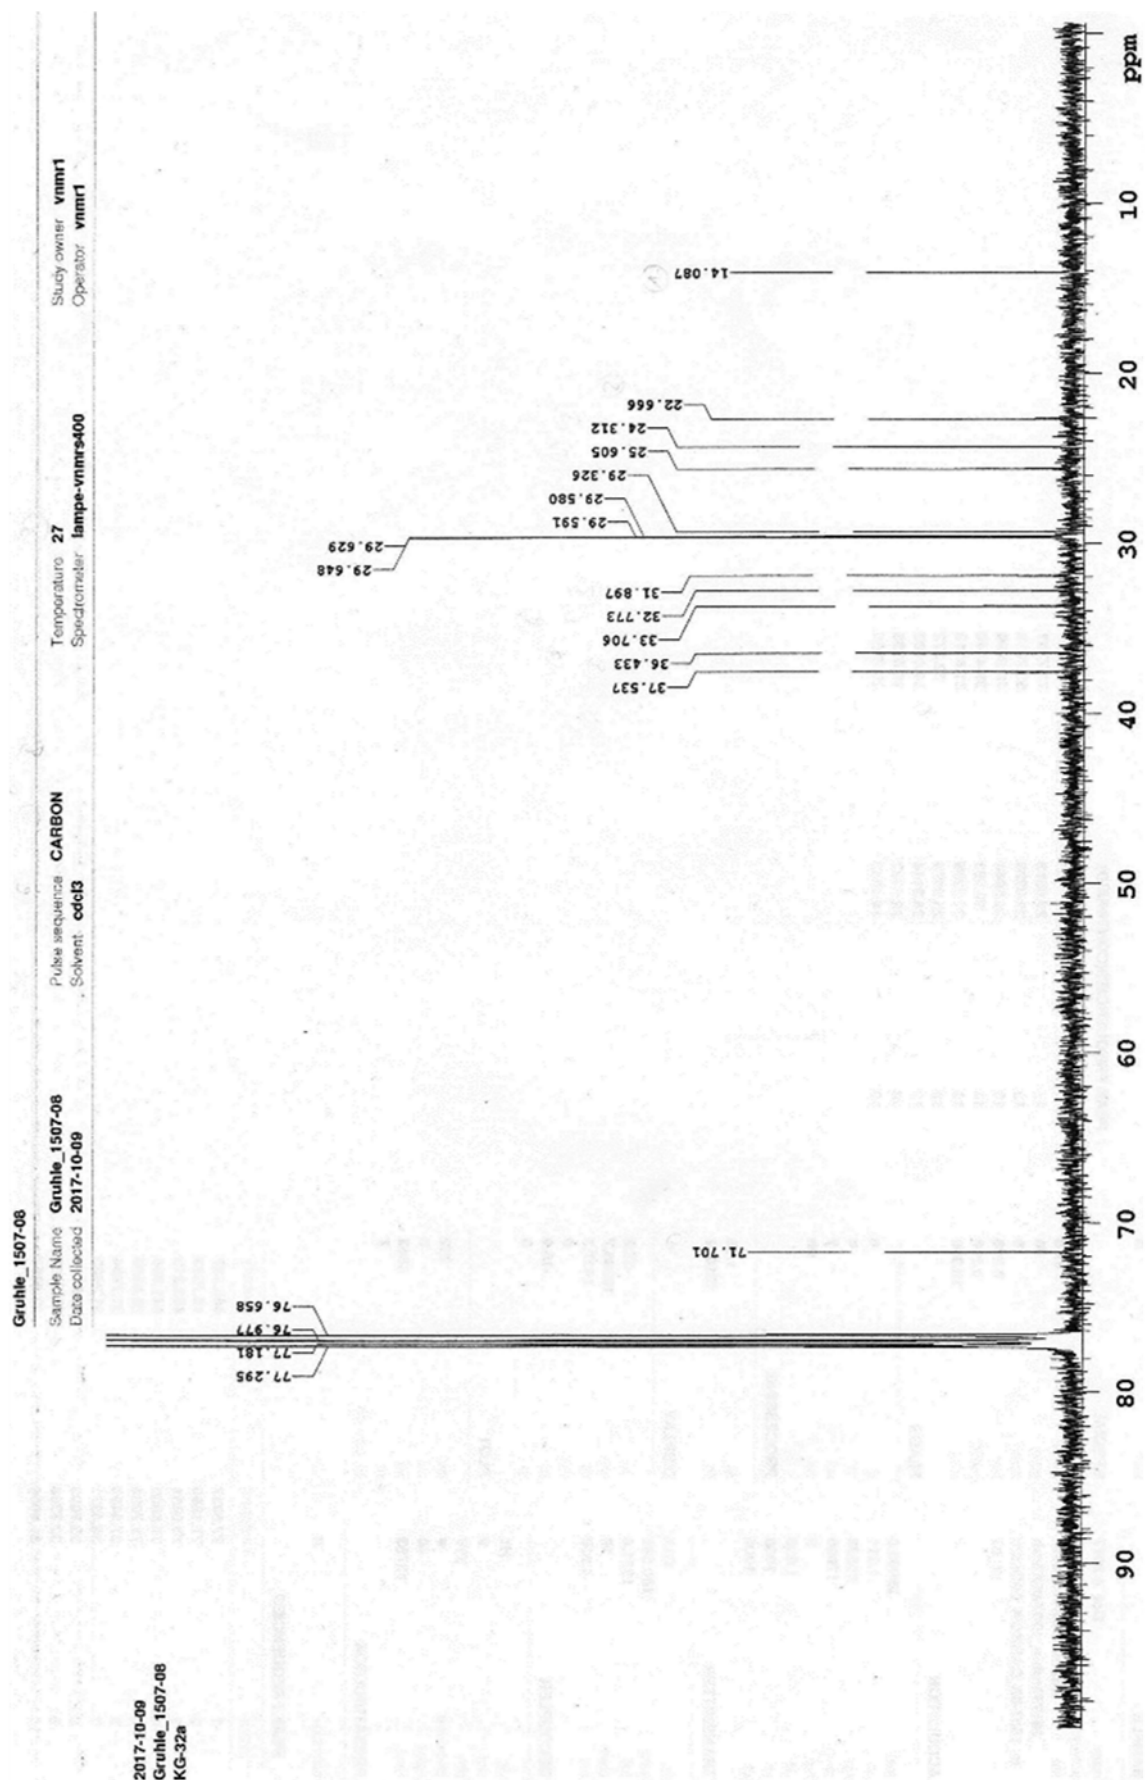

# Organic & Biomolecular Chemistry

Compound **4f** – APCI-MS (positive mode)

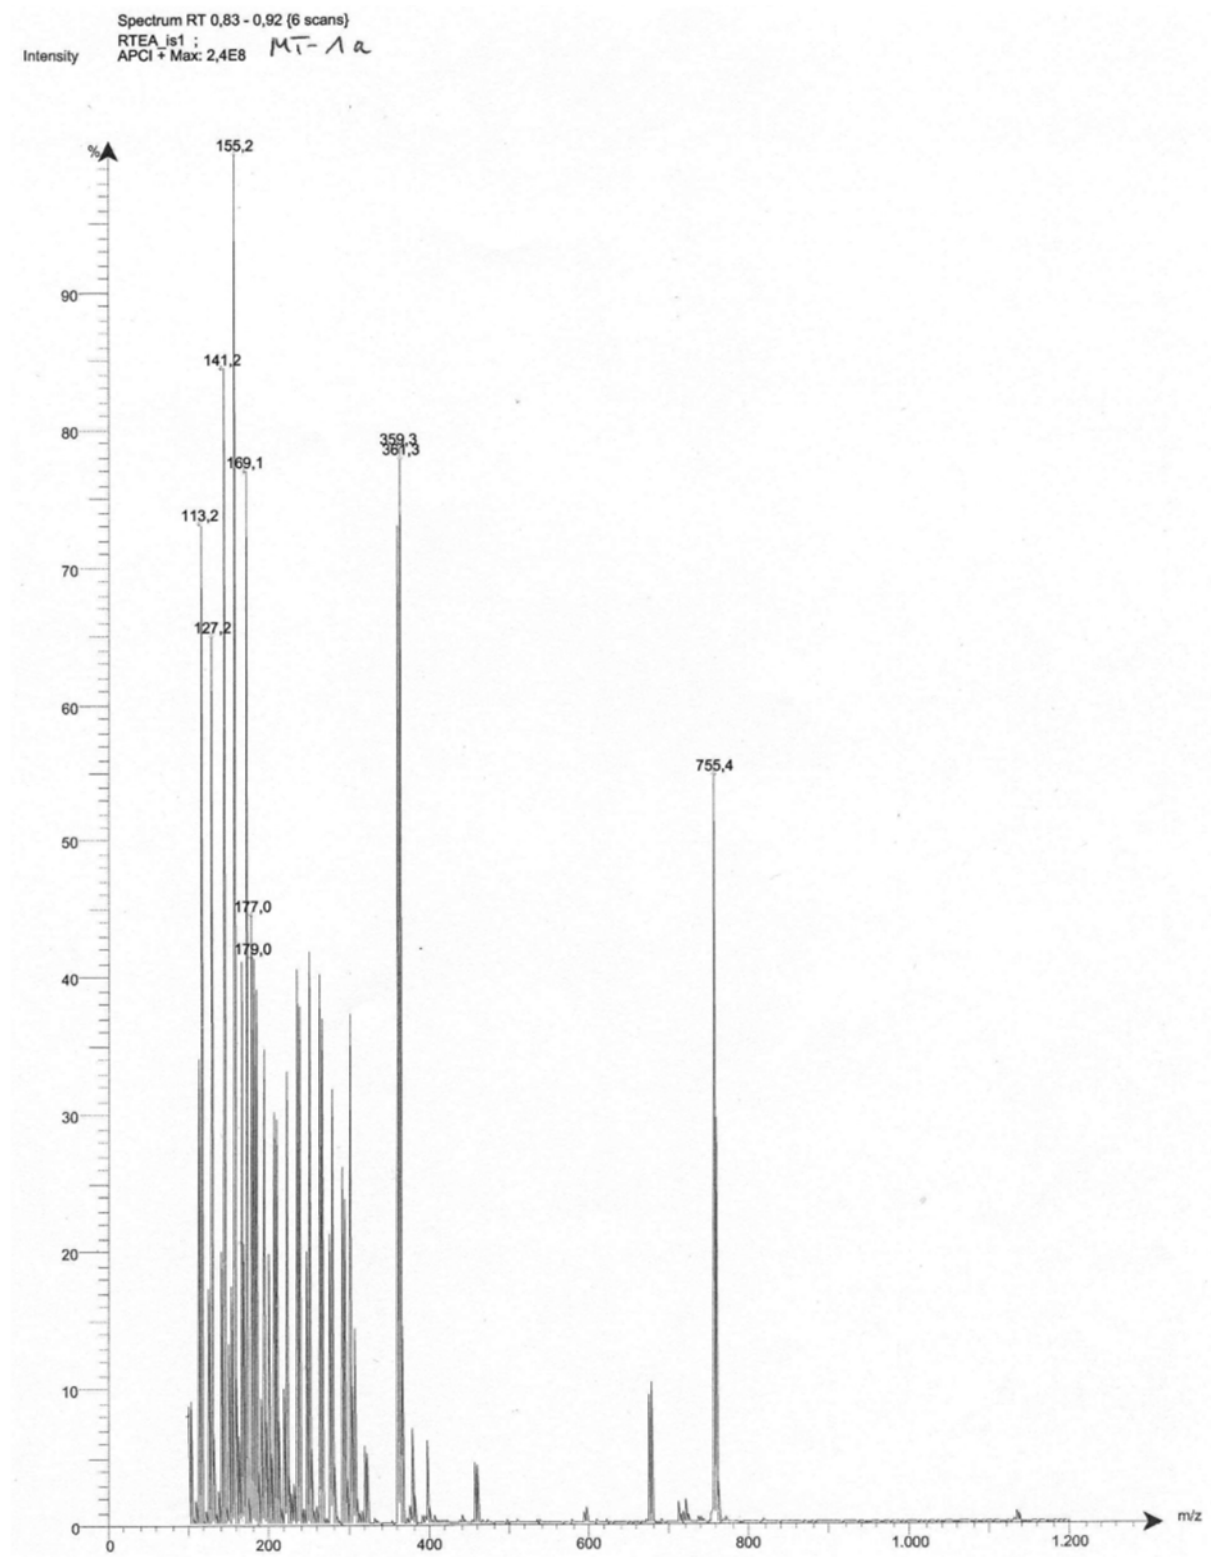

# Organic & Biomolecular Chemistry

## Compound 4f - $^1\text{H}$ NMR

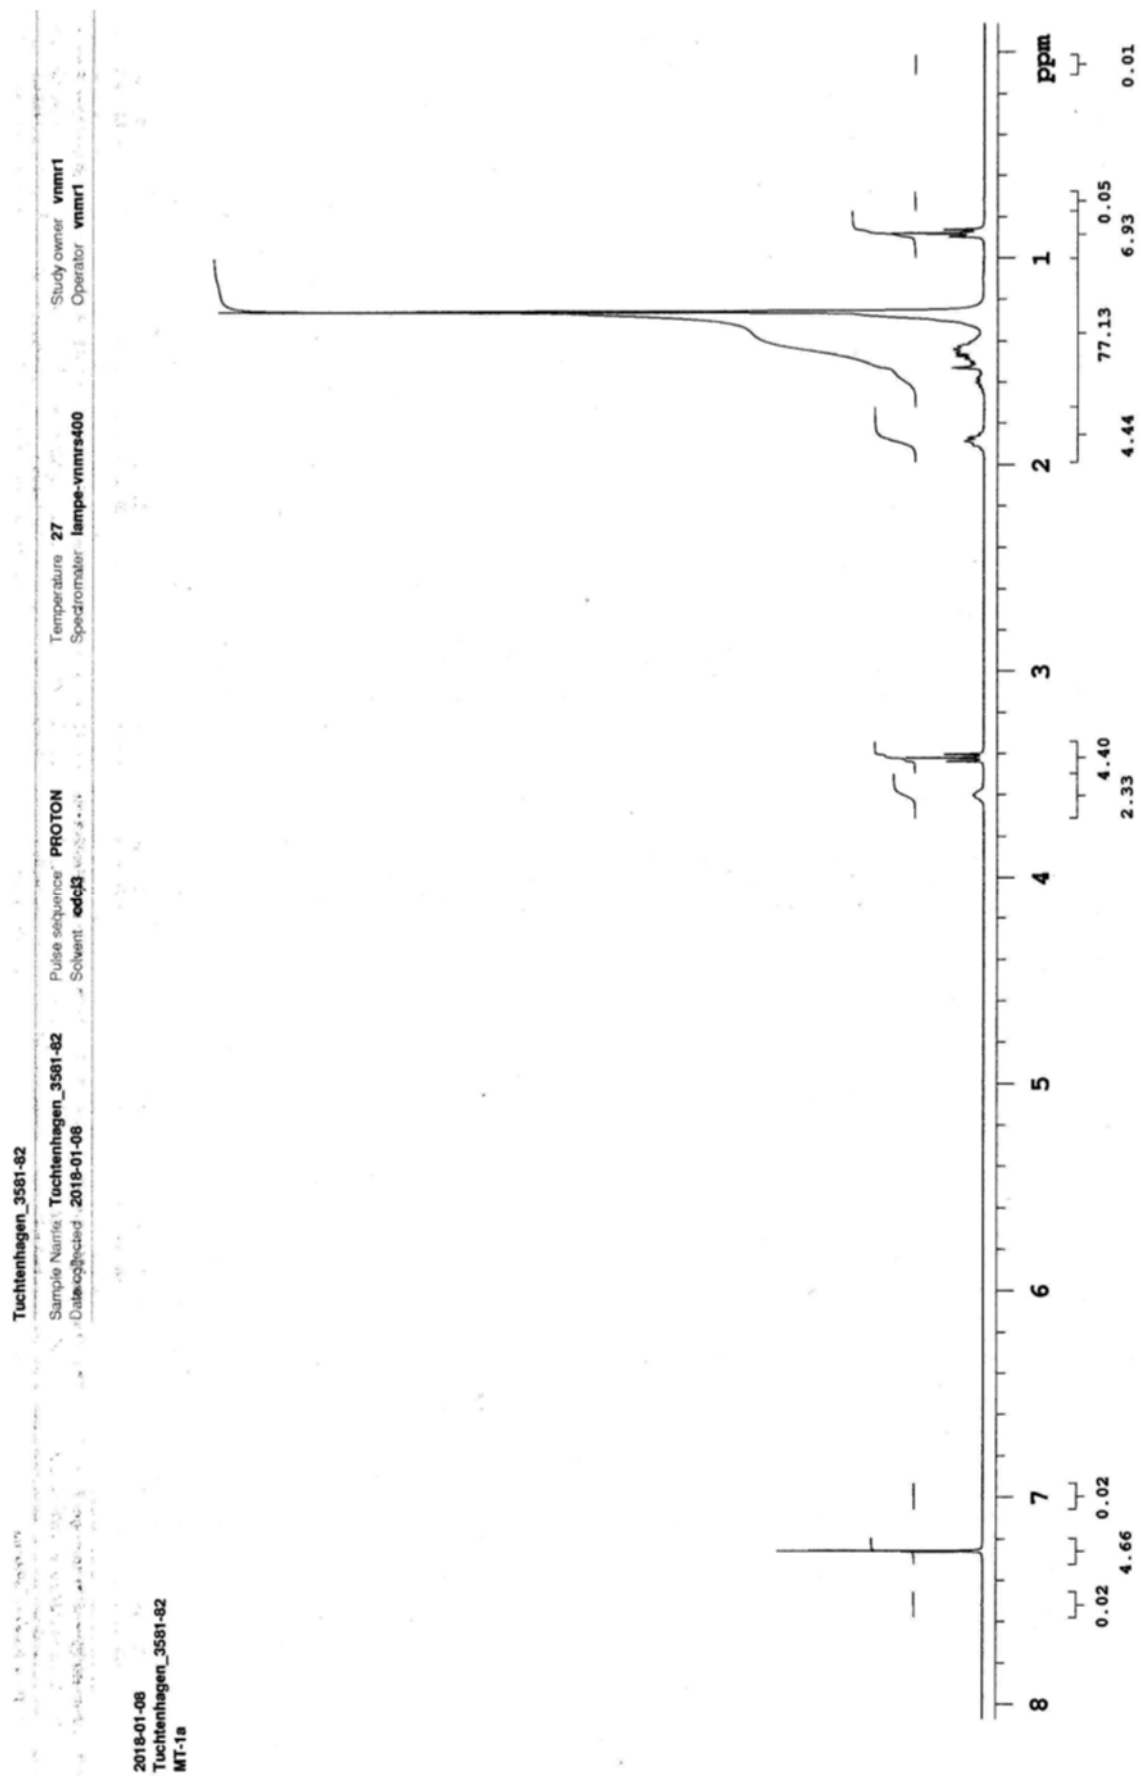

# Organic & Biomolecular Chemistry

## Compound 4f - $^{13}\text{C}$ NMR

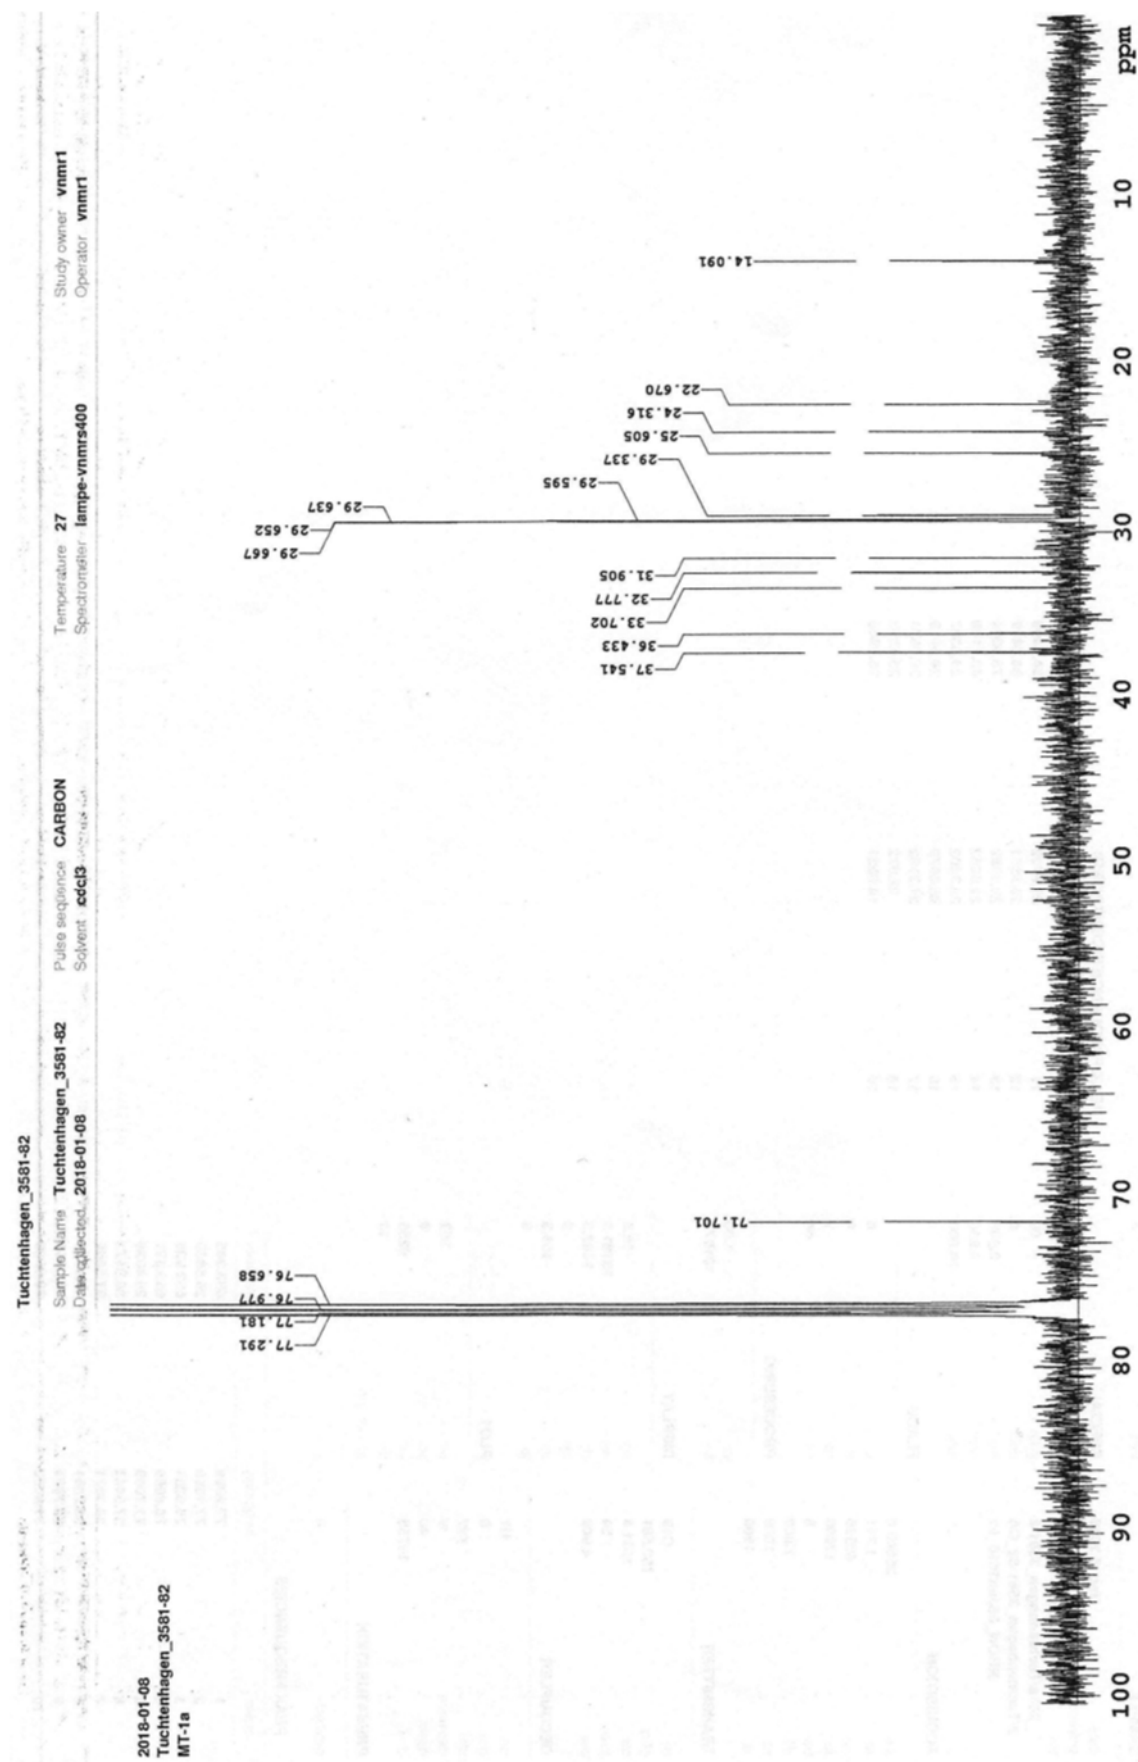

# Organic & Biomolecular Chemistry

## Compound 5a – <sup>1</sup>H NMR

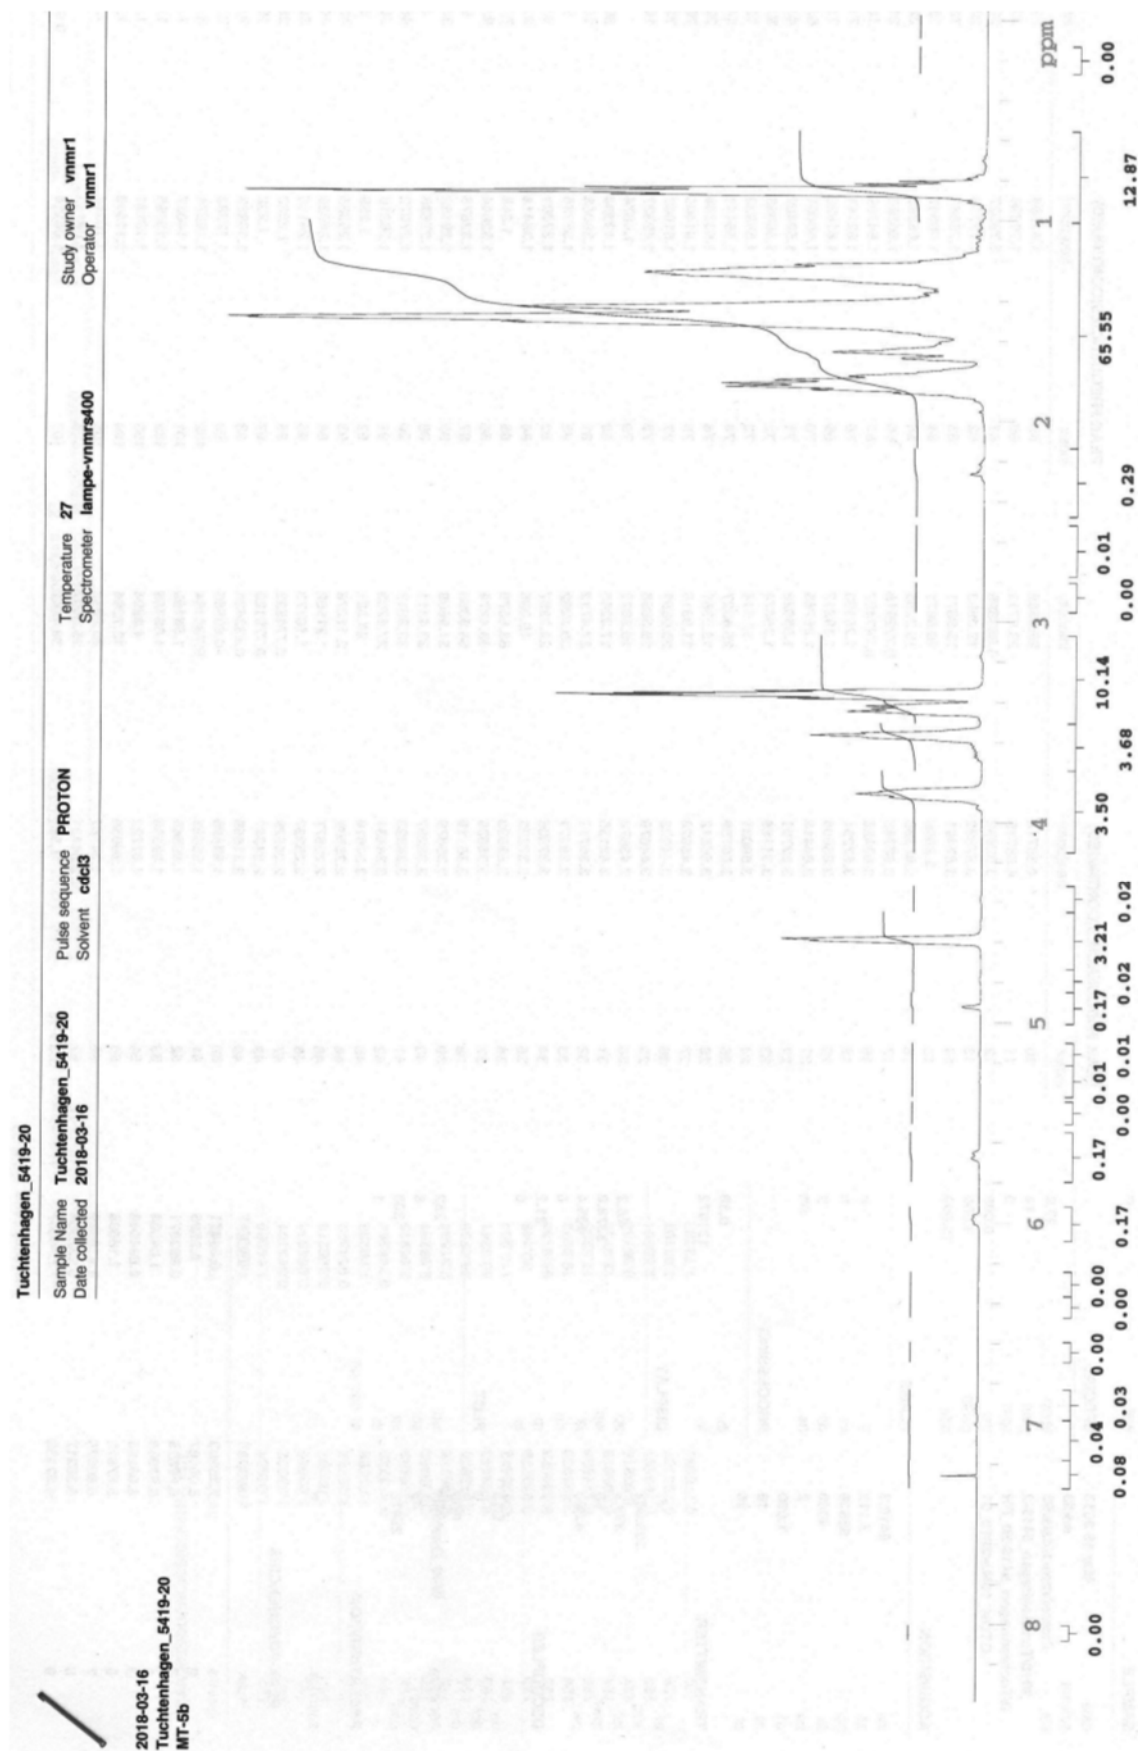



# Organic & Biomolecular Chemistry

## Compound 5a – $^{13}\text{C}$ NMR

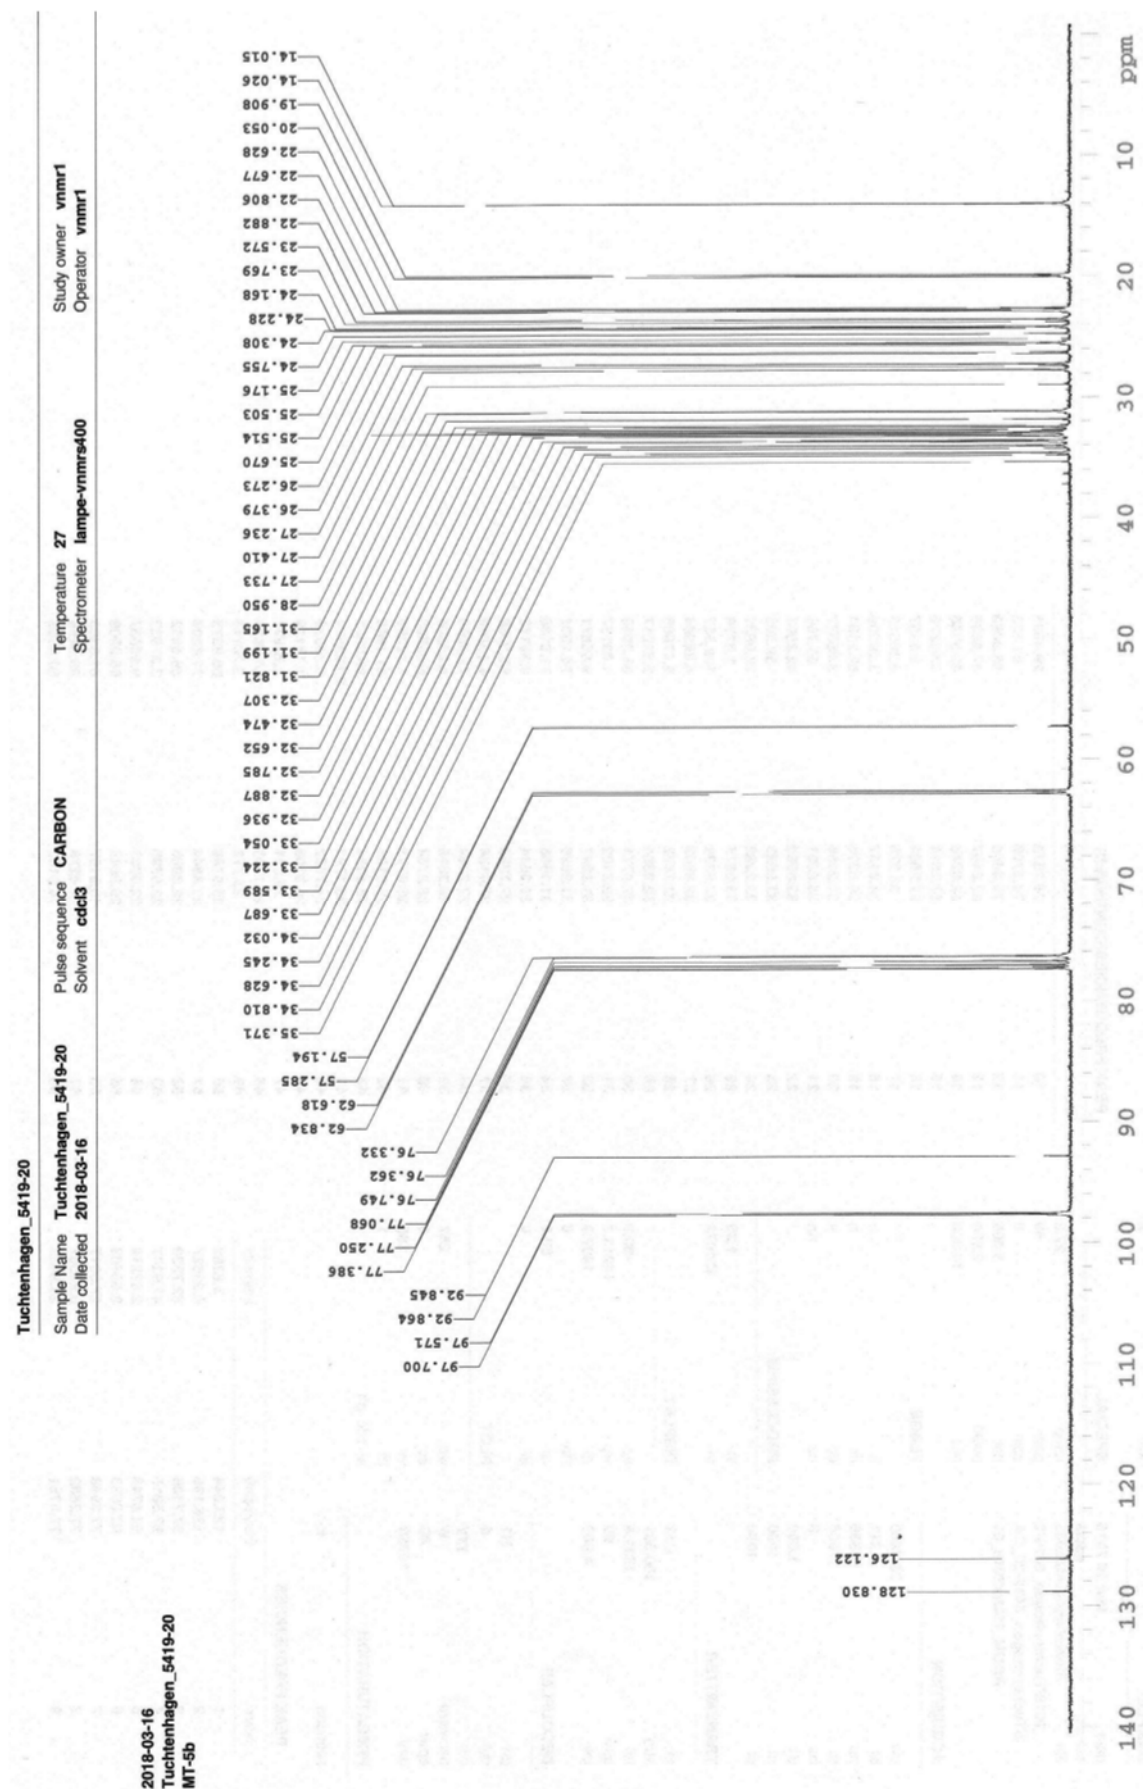

# Organic & Biomolecular Chemistry

## Compound 5b – ESI-MS (positive mode)

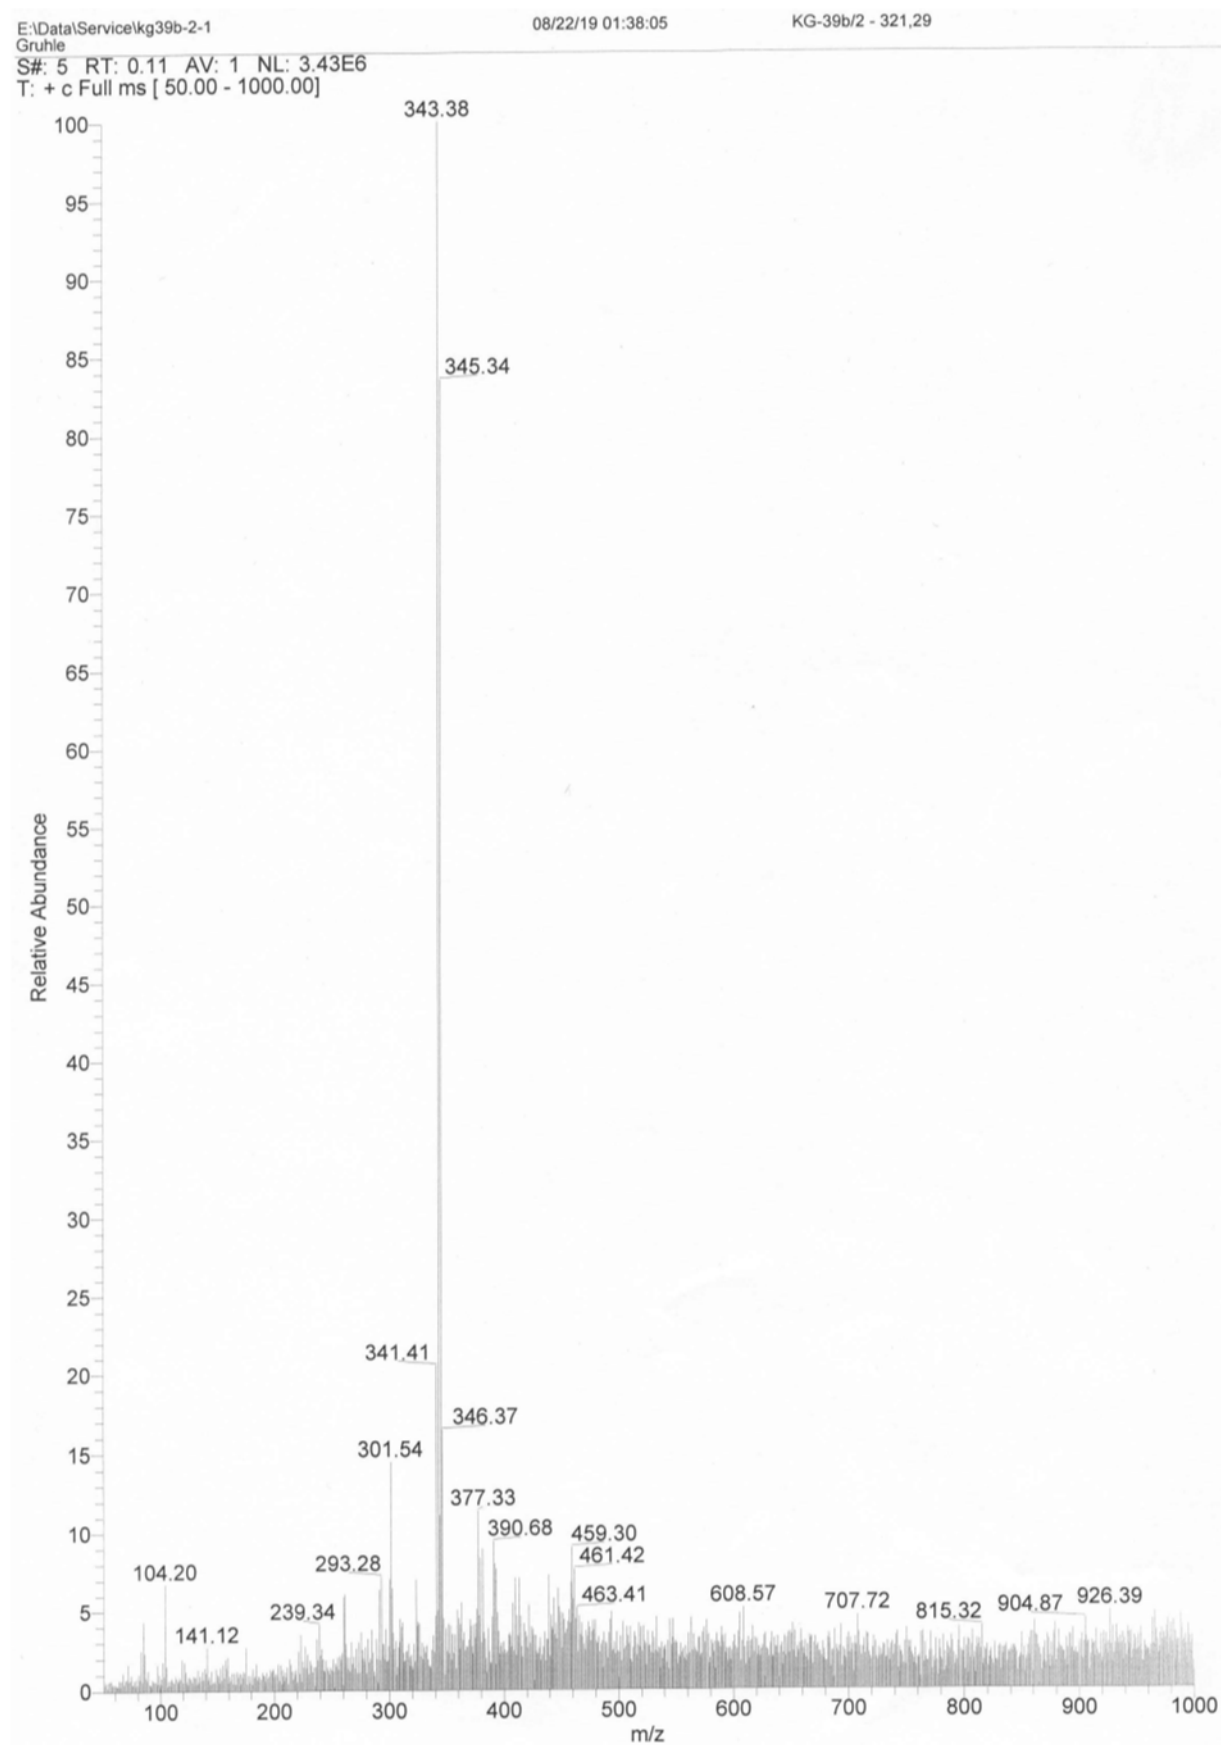

# Organic & Biomolecular Chemistry

Compound 5b -  $^1\text{H}$  NMR

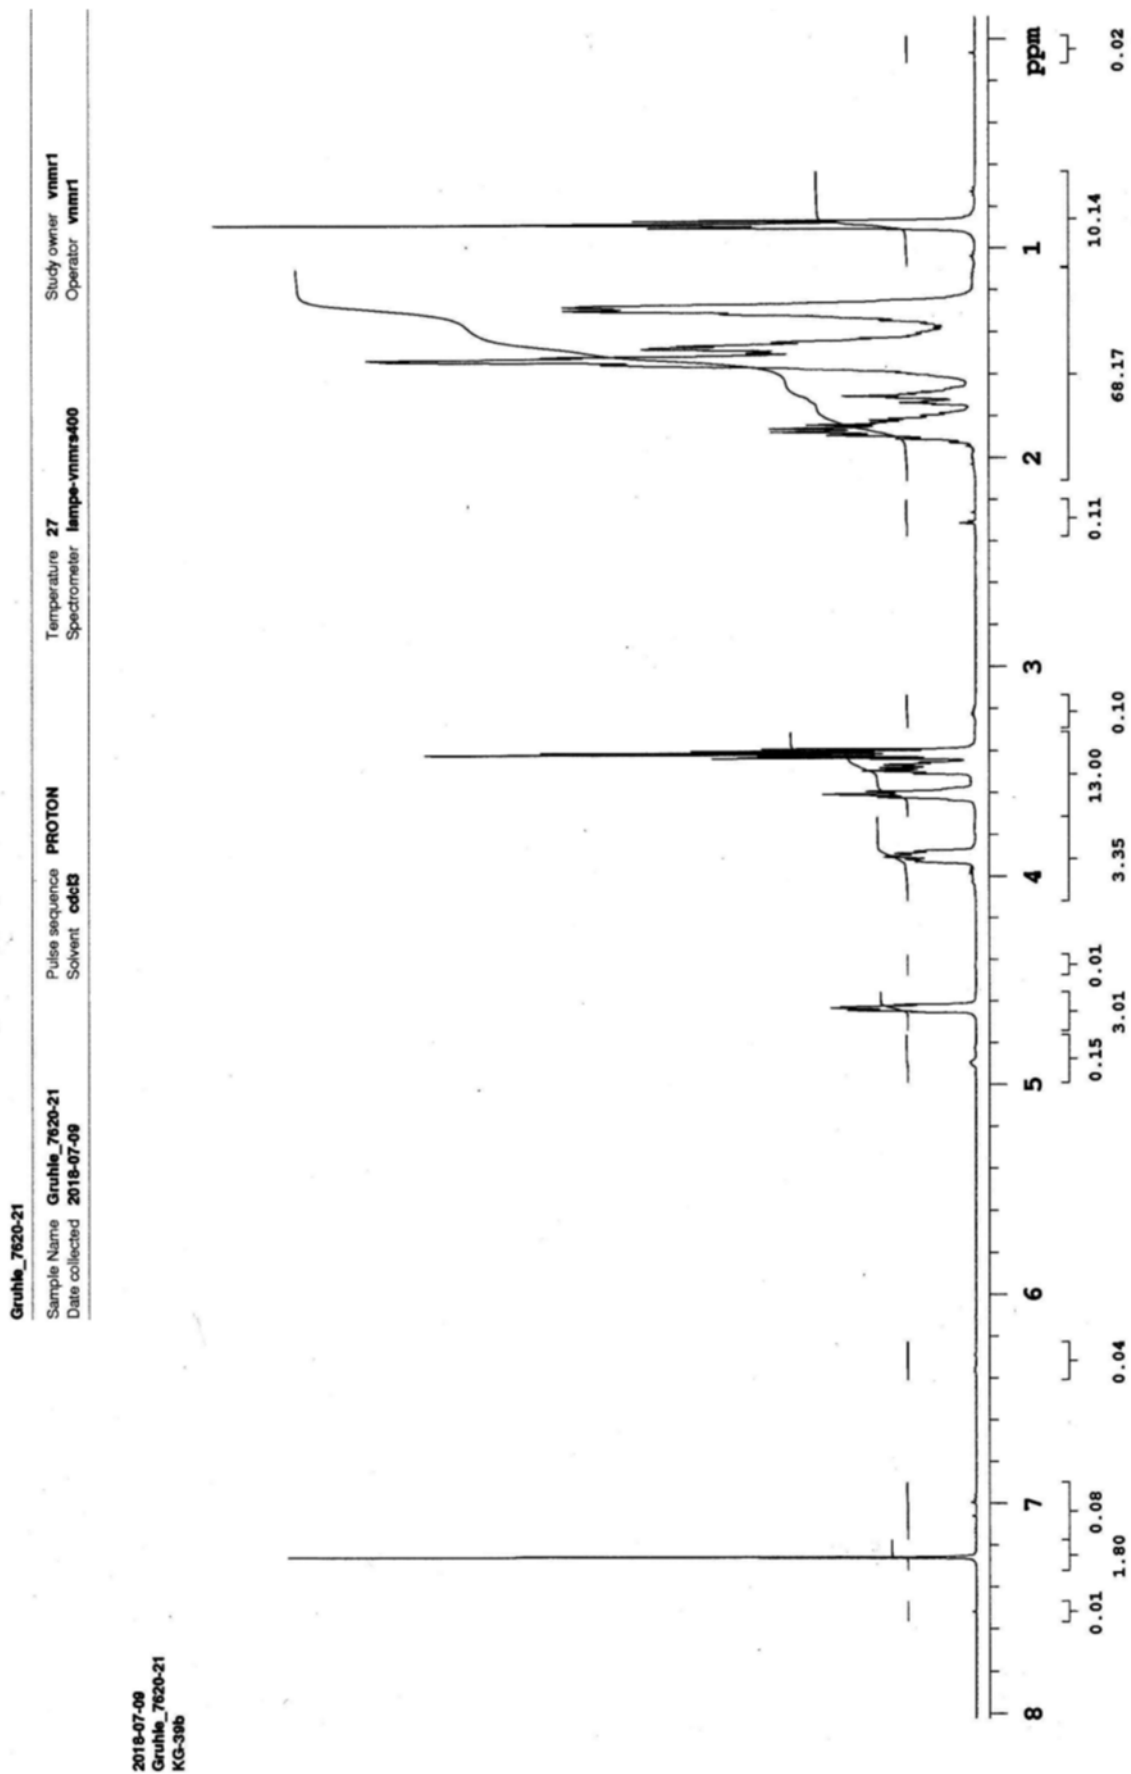

# Organic & Biomolecular Chemistry

## Compound 5b - $^{13}\text{C}$ NMR

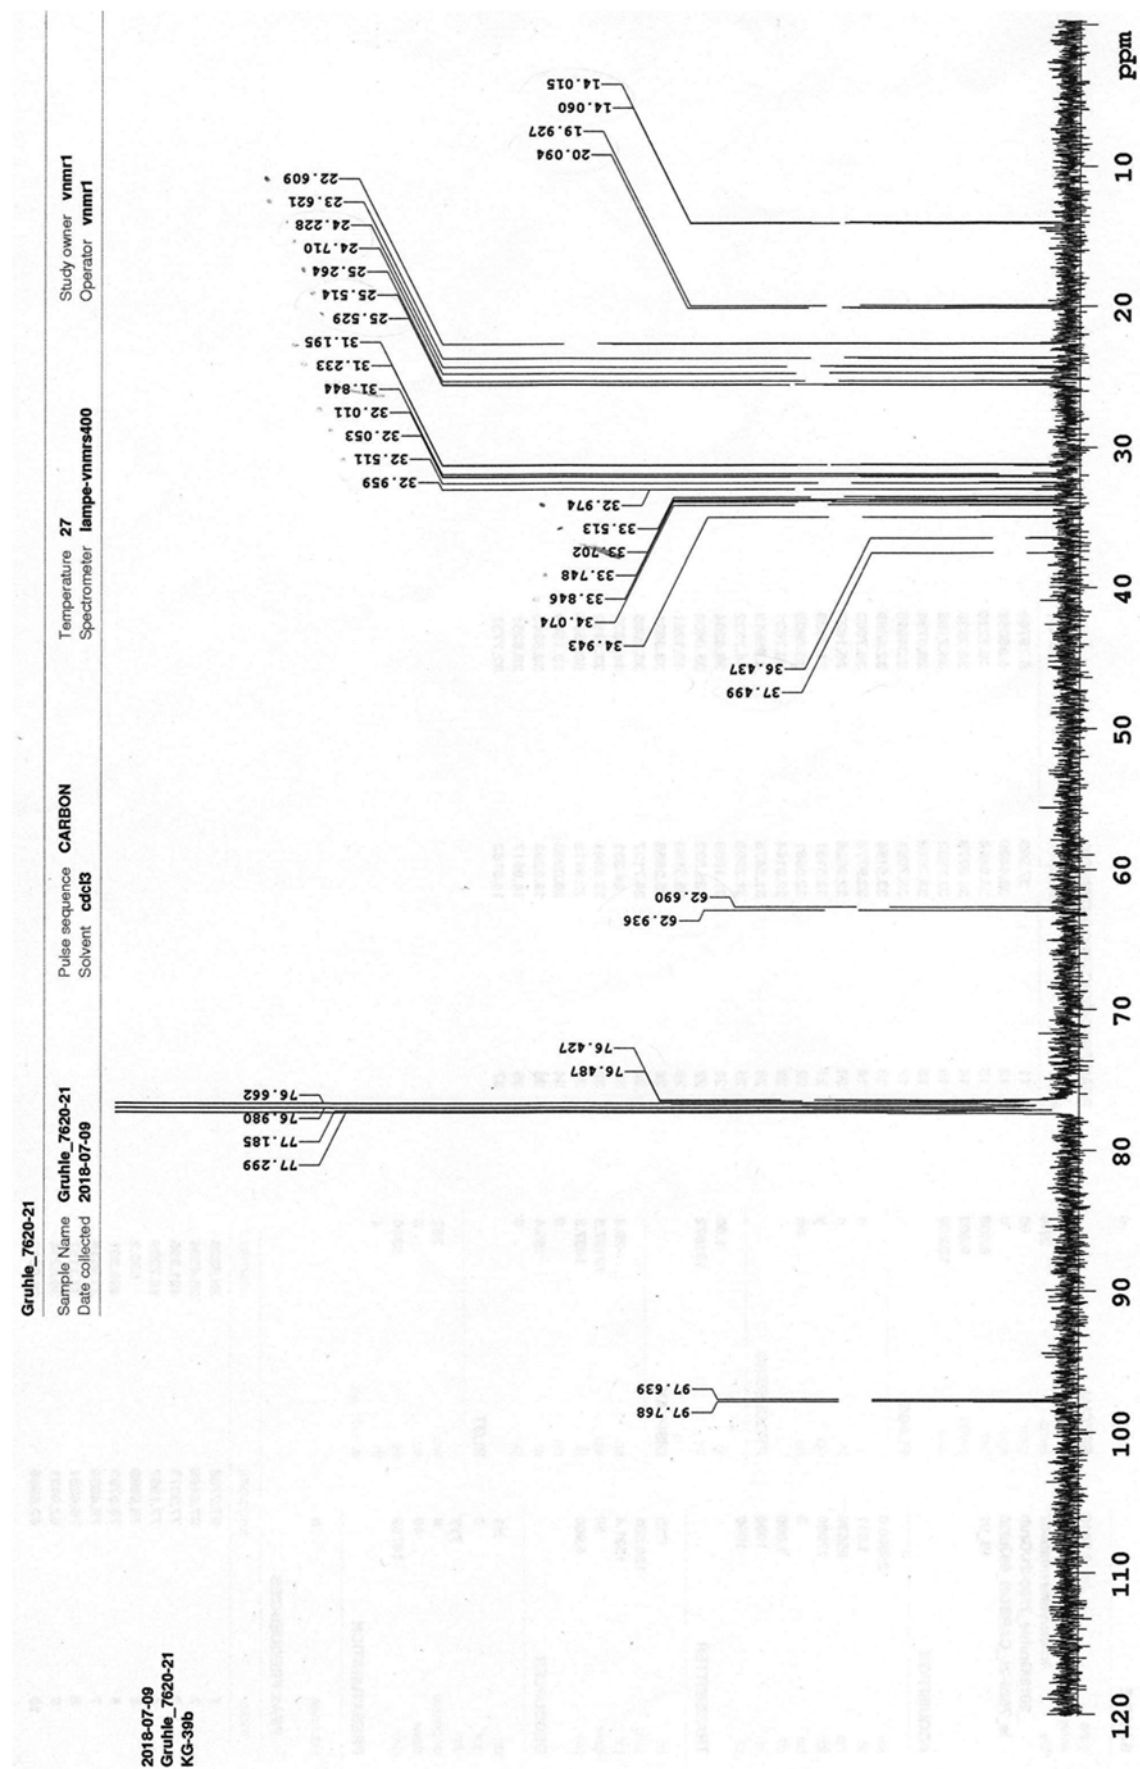

# Organic & Biomolecular Chemistry

## Compound 5c – ESI-MS (positive mode)

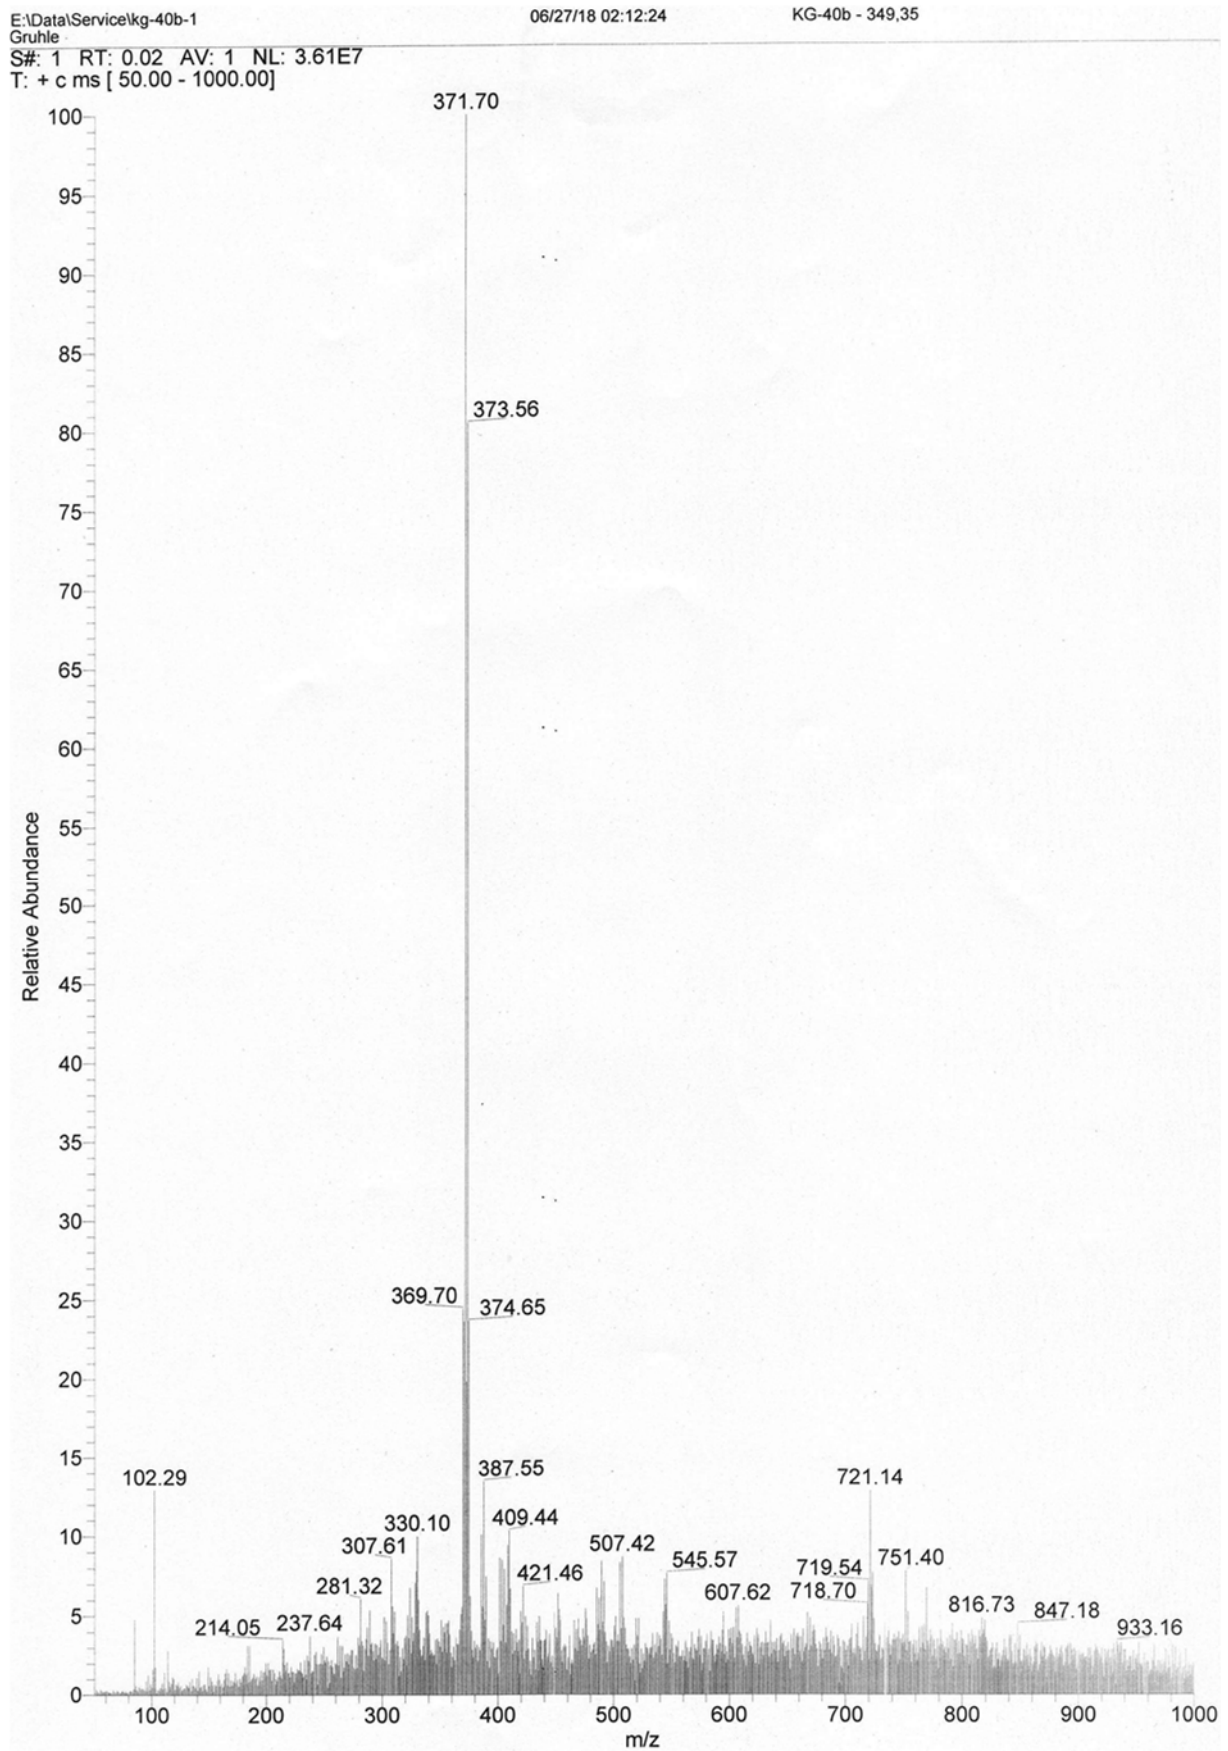

# Organic & Biomolecular Chemistry

## Compound 5c – $^1\text{H}$ NMR

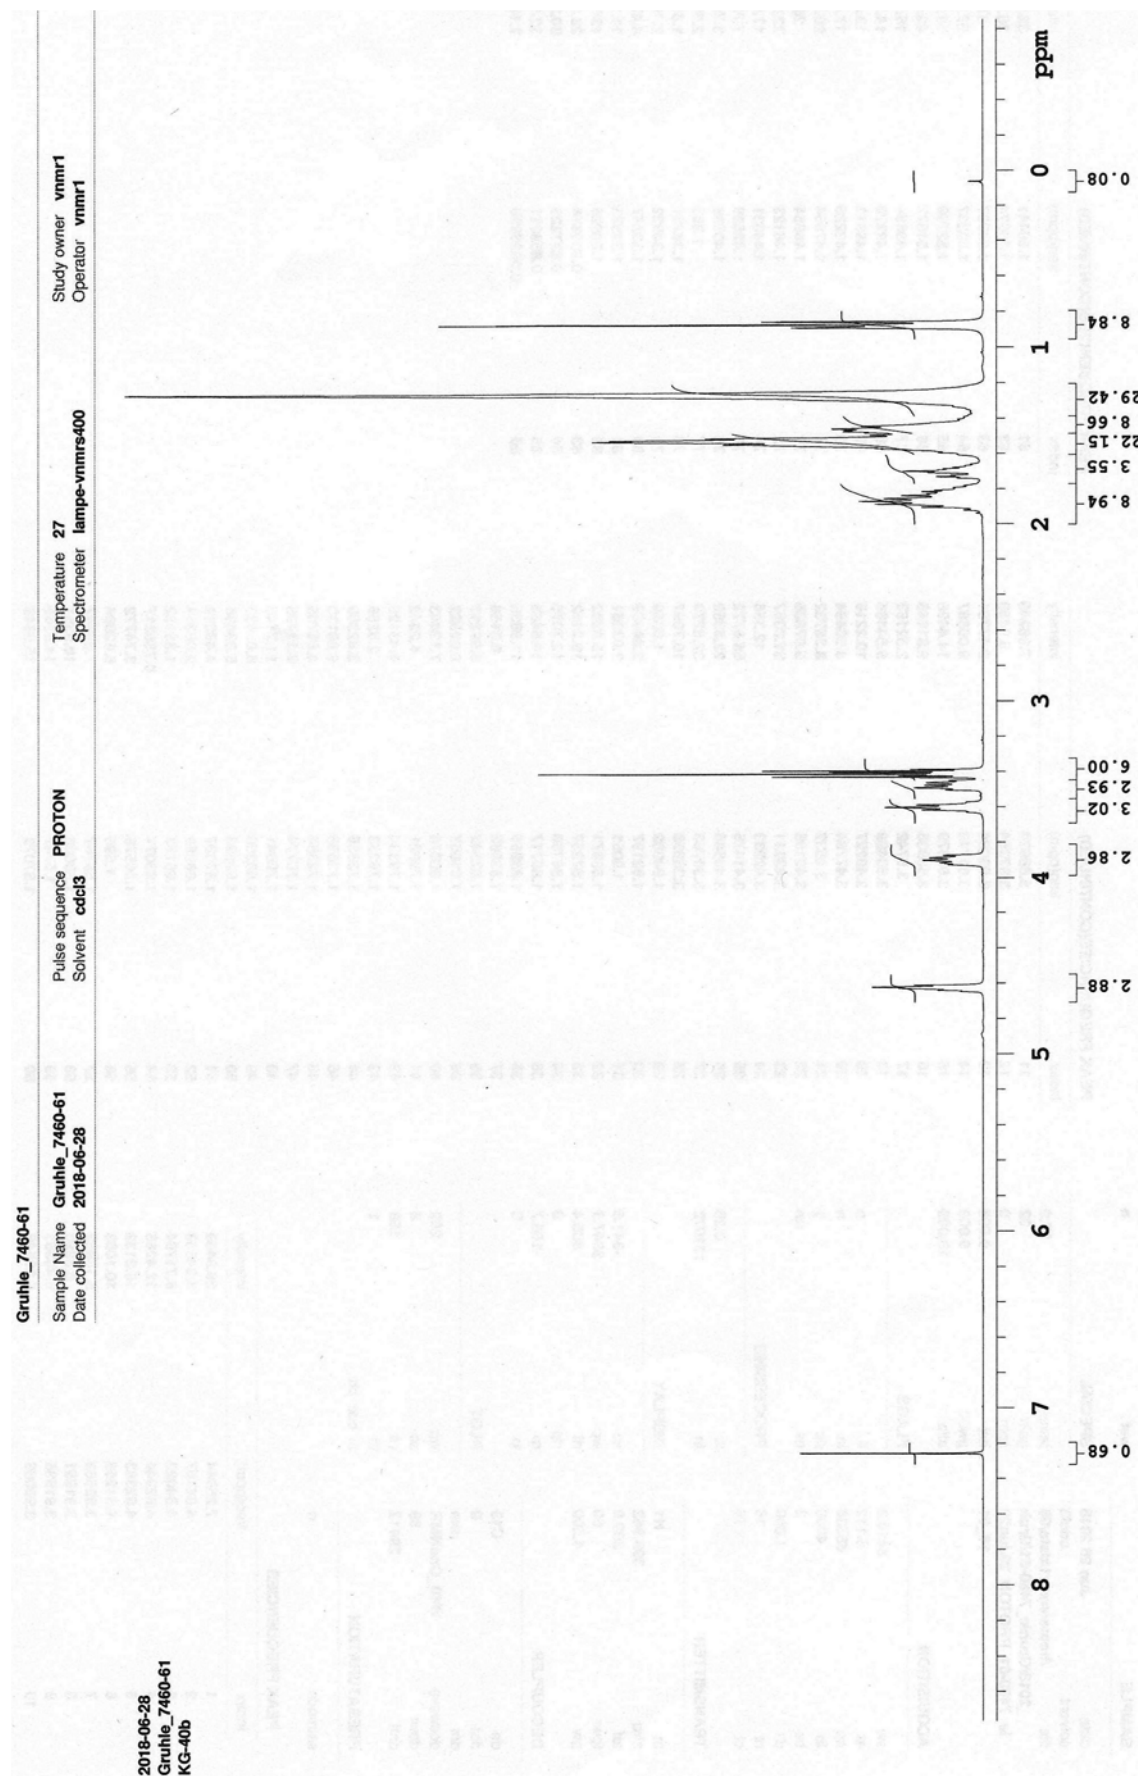

# Organic & Biomolecular Chemistry

## Compound 5c – $^{13}\text{C}$ NMR

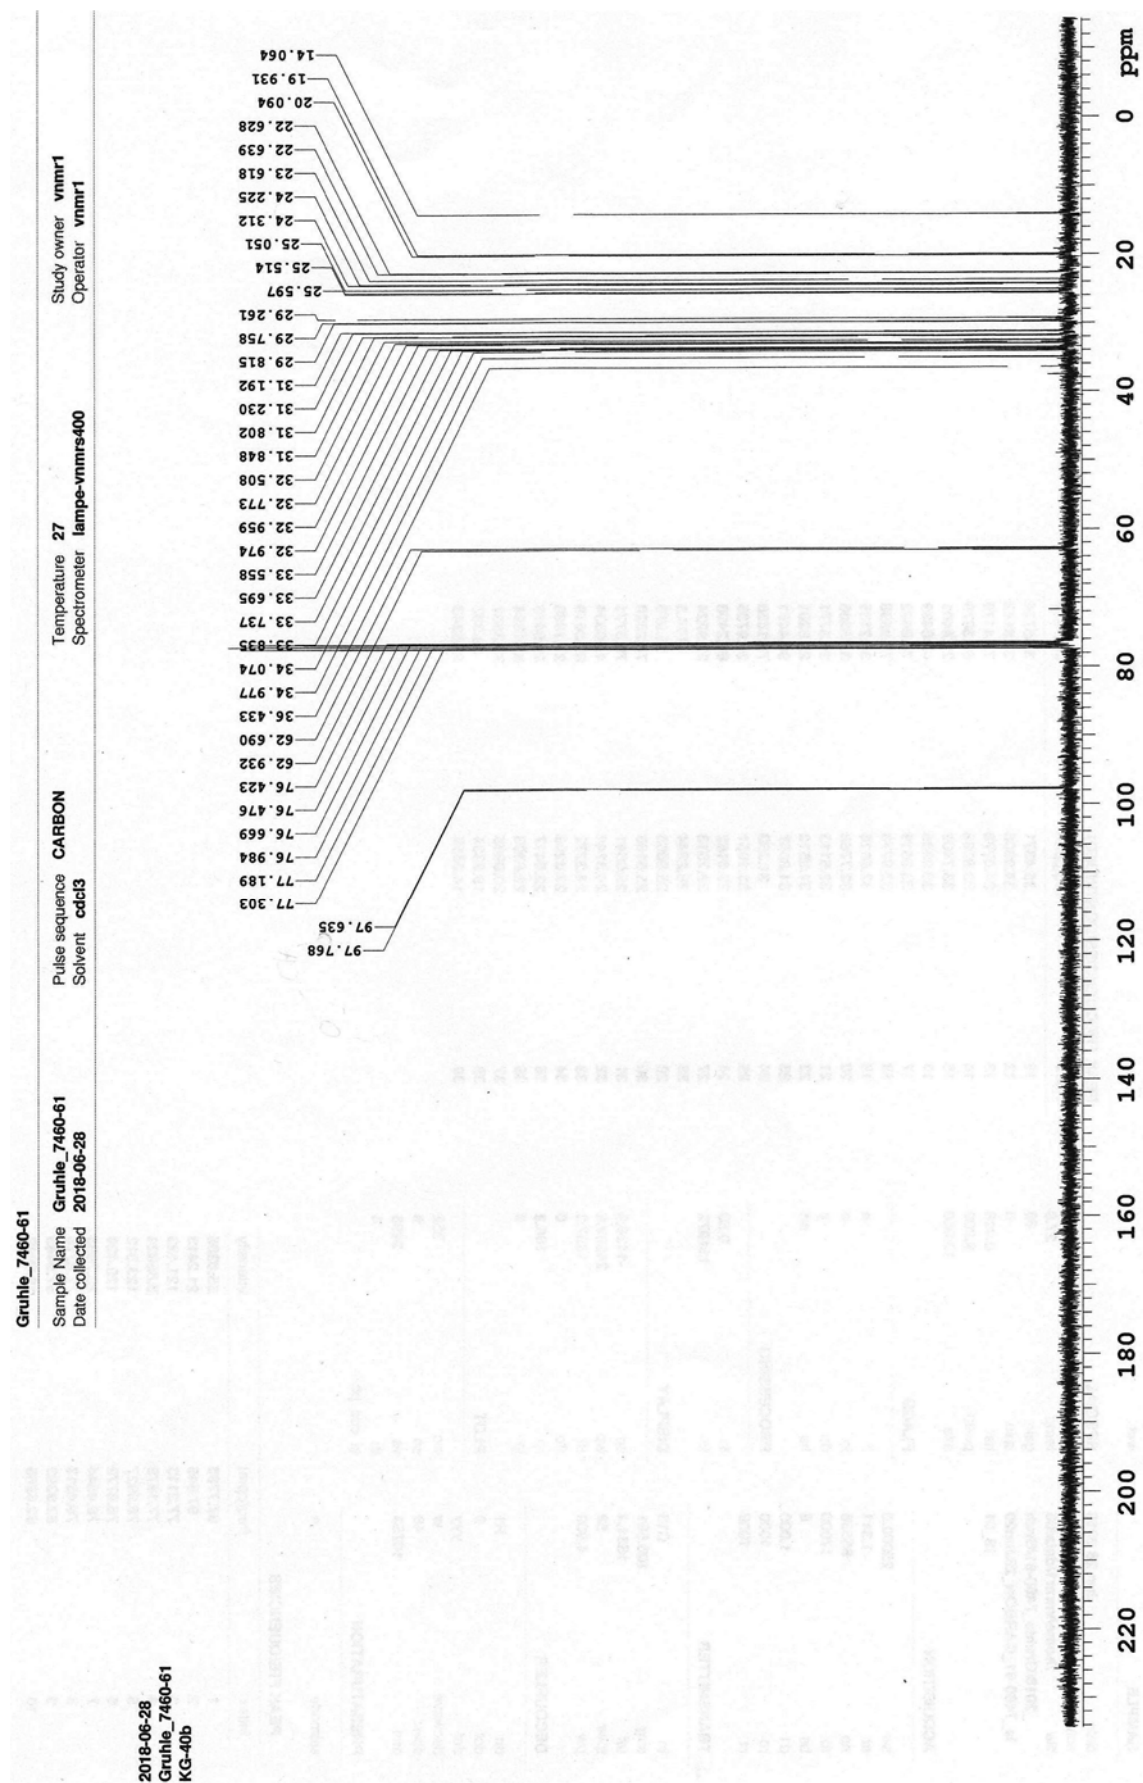

# Organic & Biomolecular Chemistry

Compound 5d – ESI-MS (positive mode)

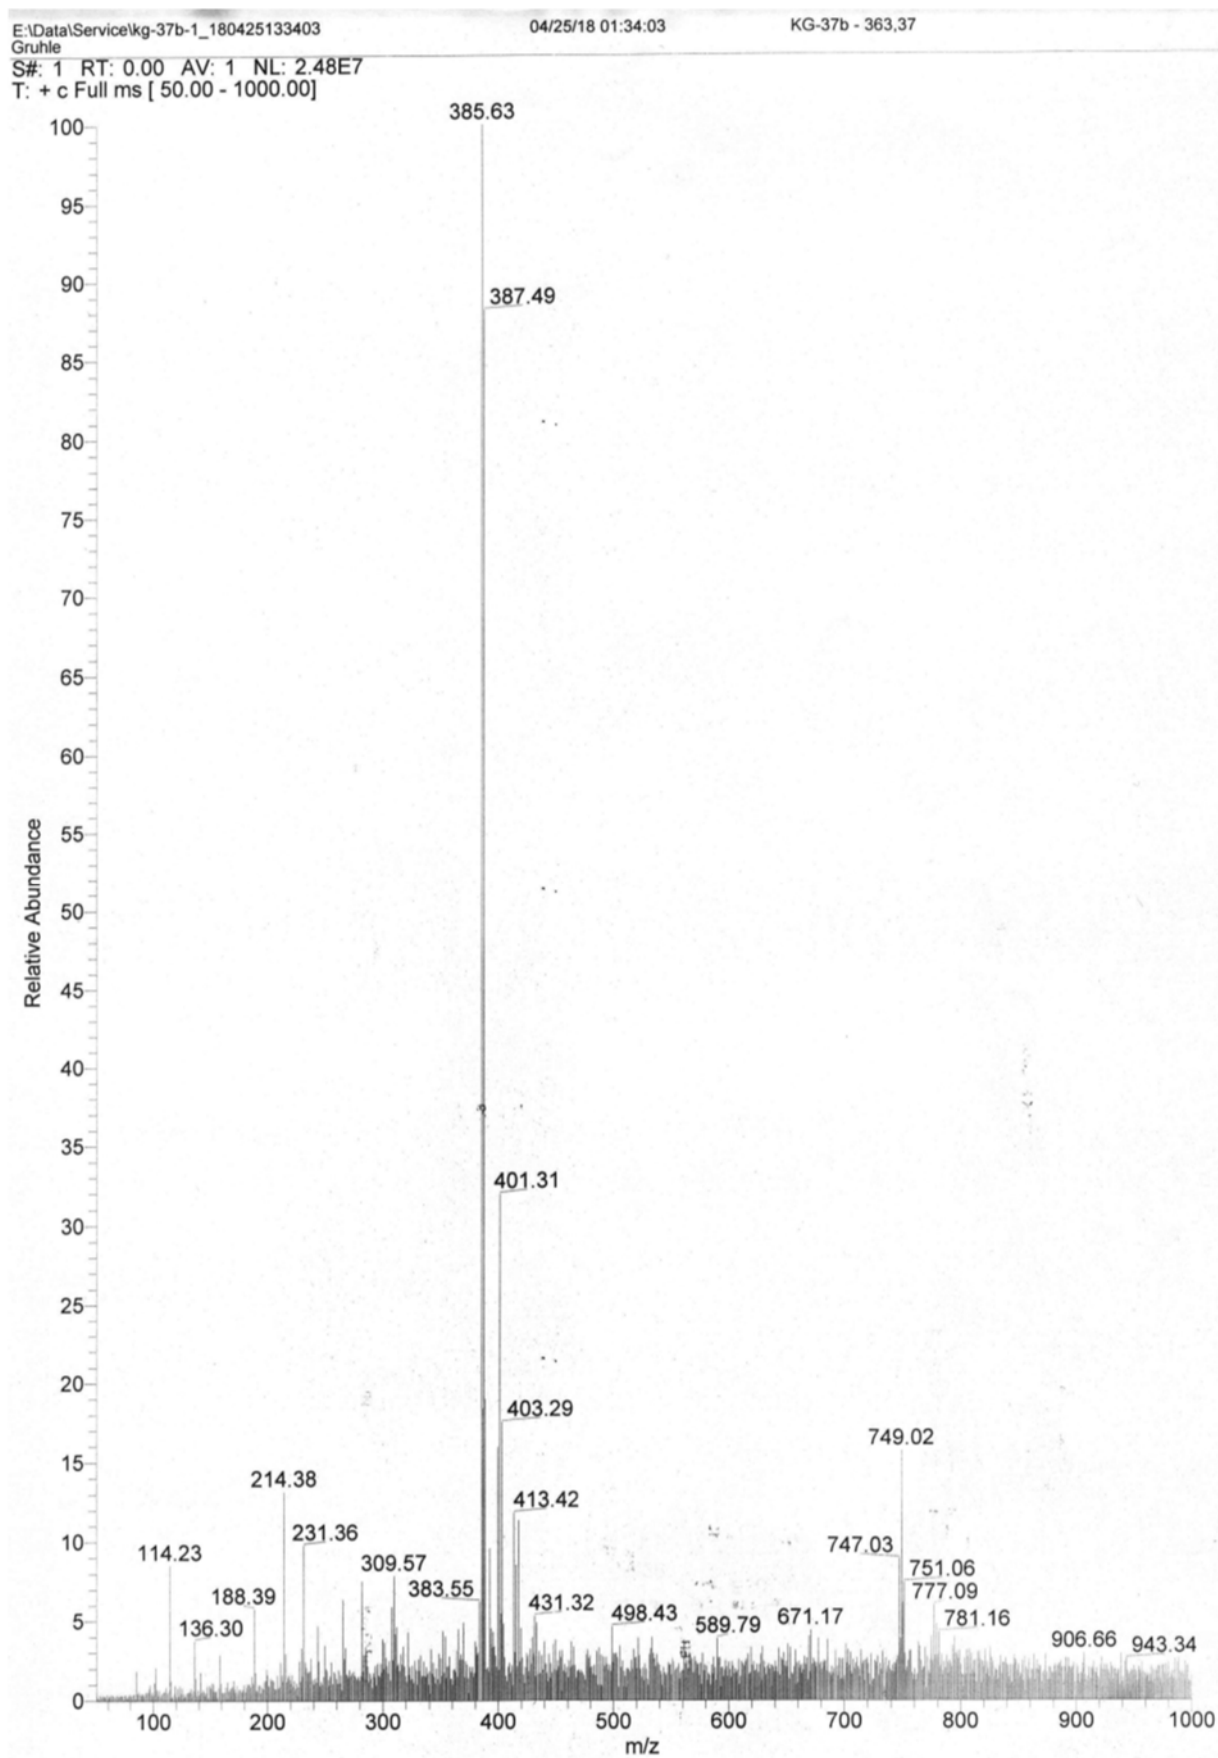



# Organic & Biomolecular Chemistry

## Compound 5d - $^1\text{H}$ NMR

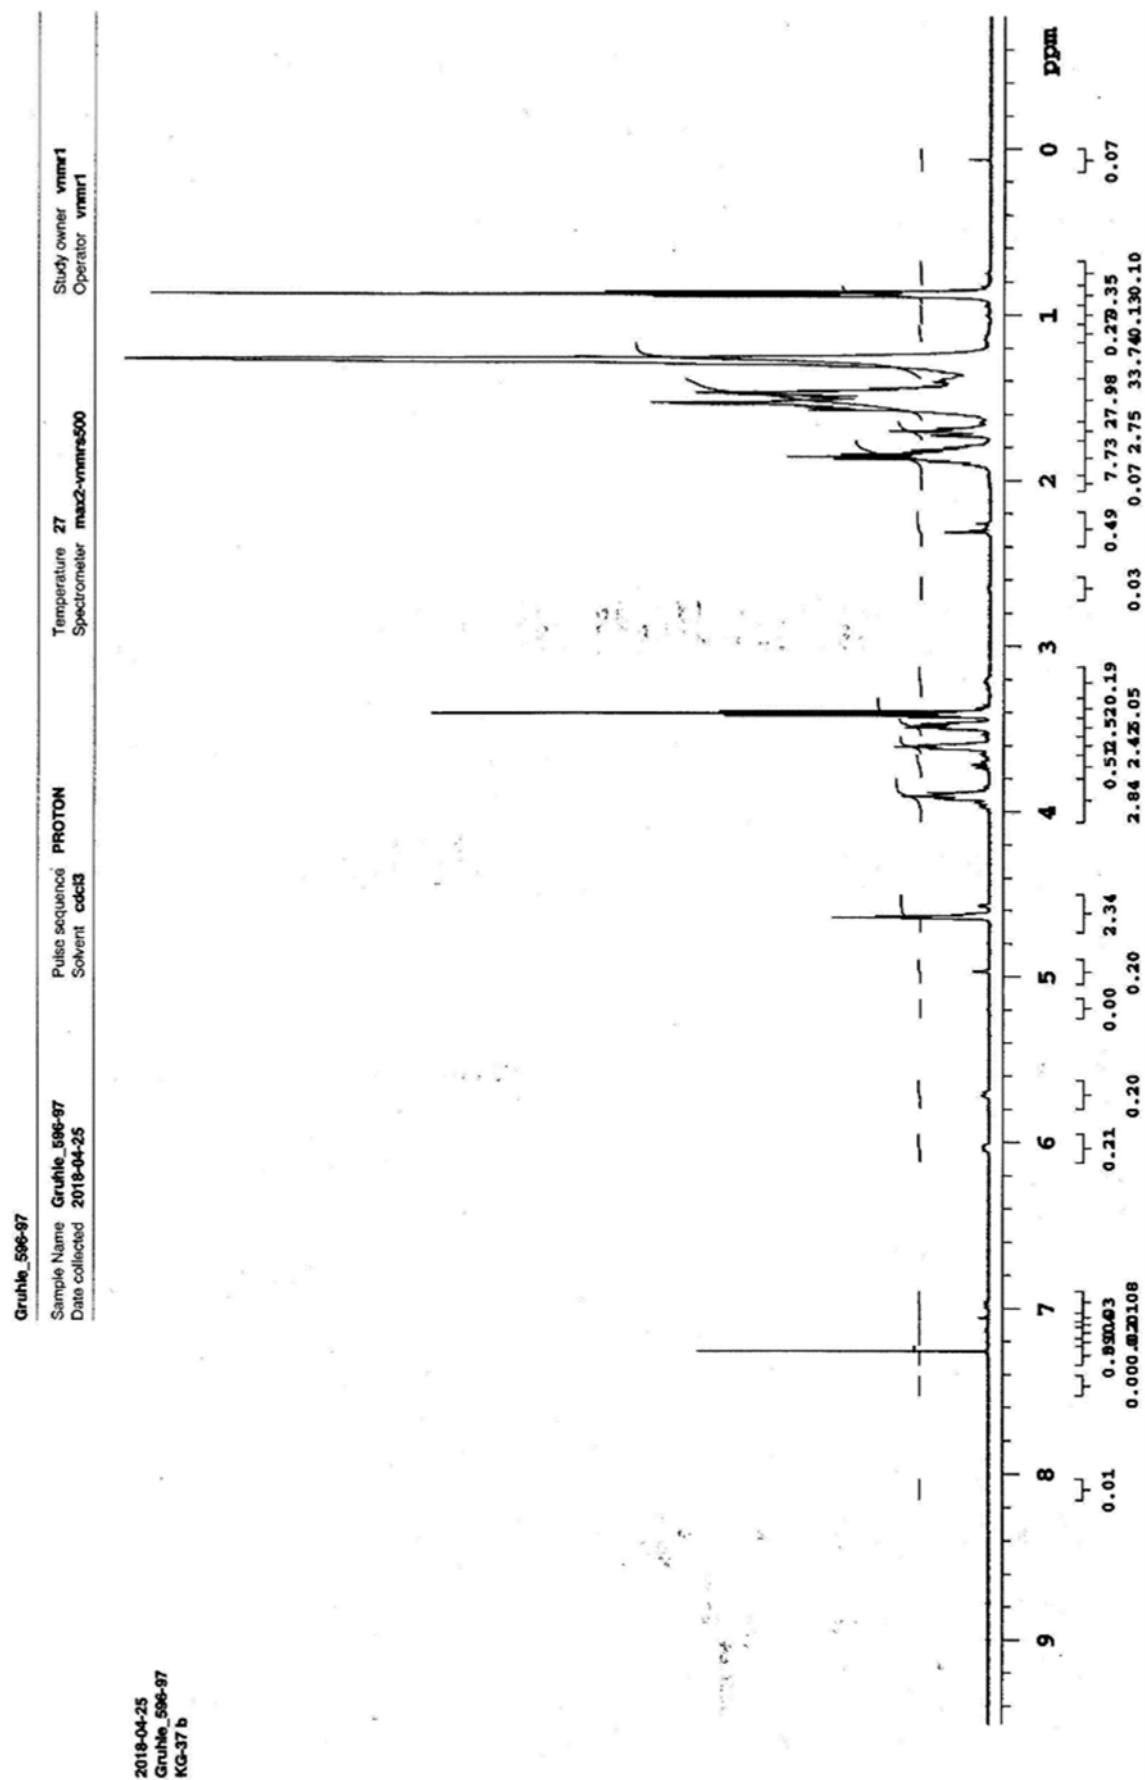

# Organic & Biomolecular Chemistry

## Compound 5d - $^{13}\text{C}$ NMR

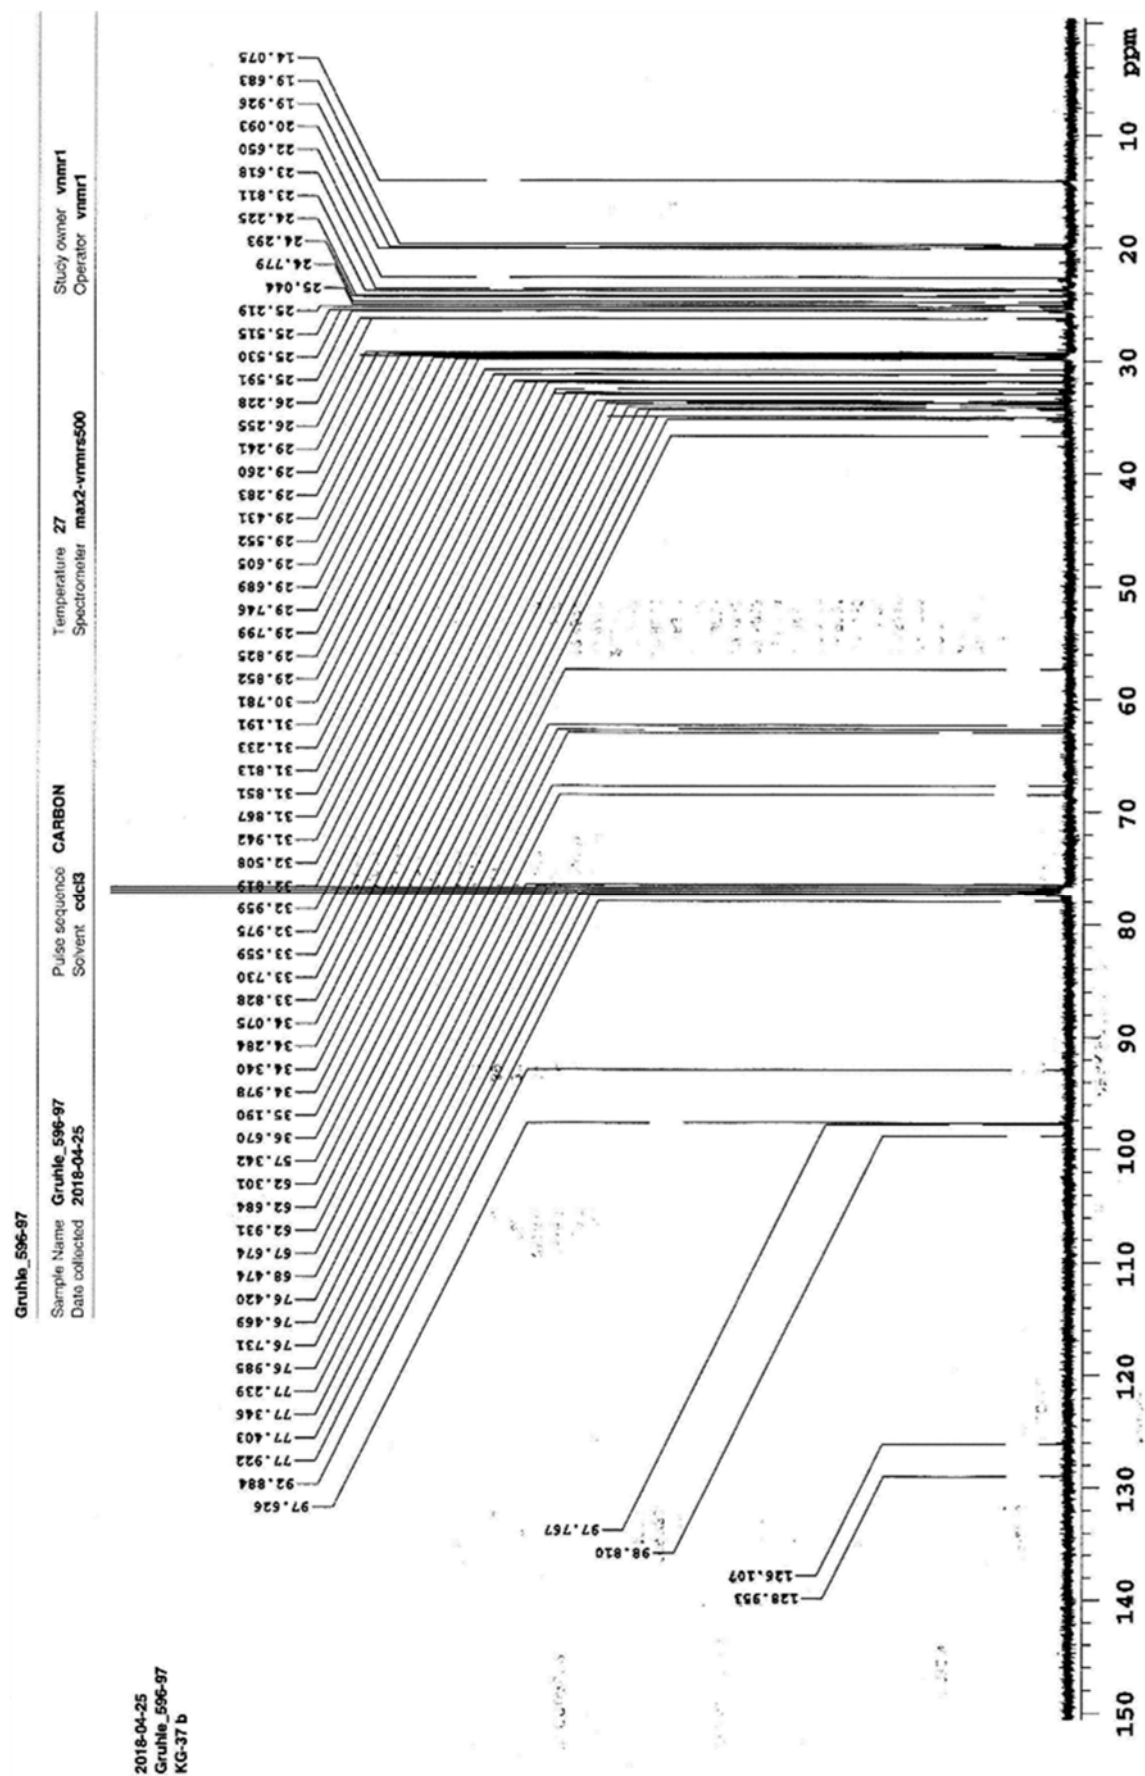

# Organic & Biomolecular Chemistry

Compound 5e – ESI-MS (positive mode)

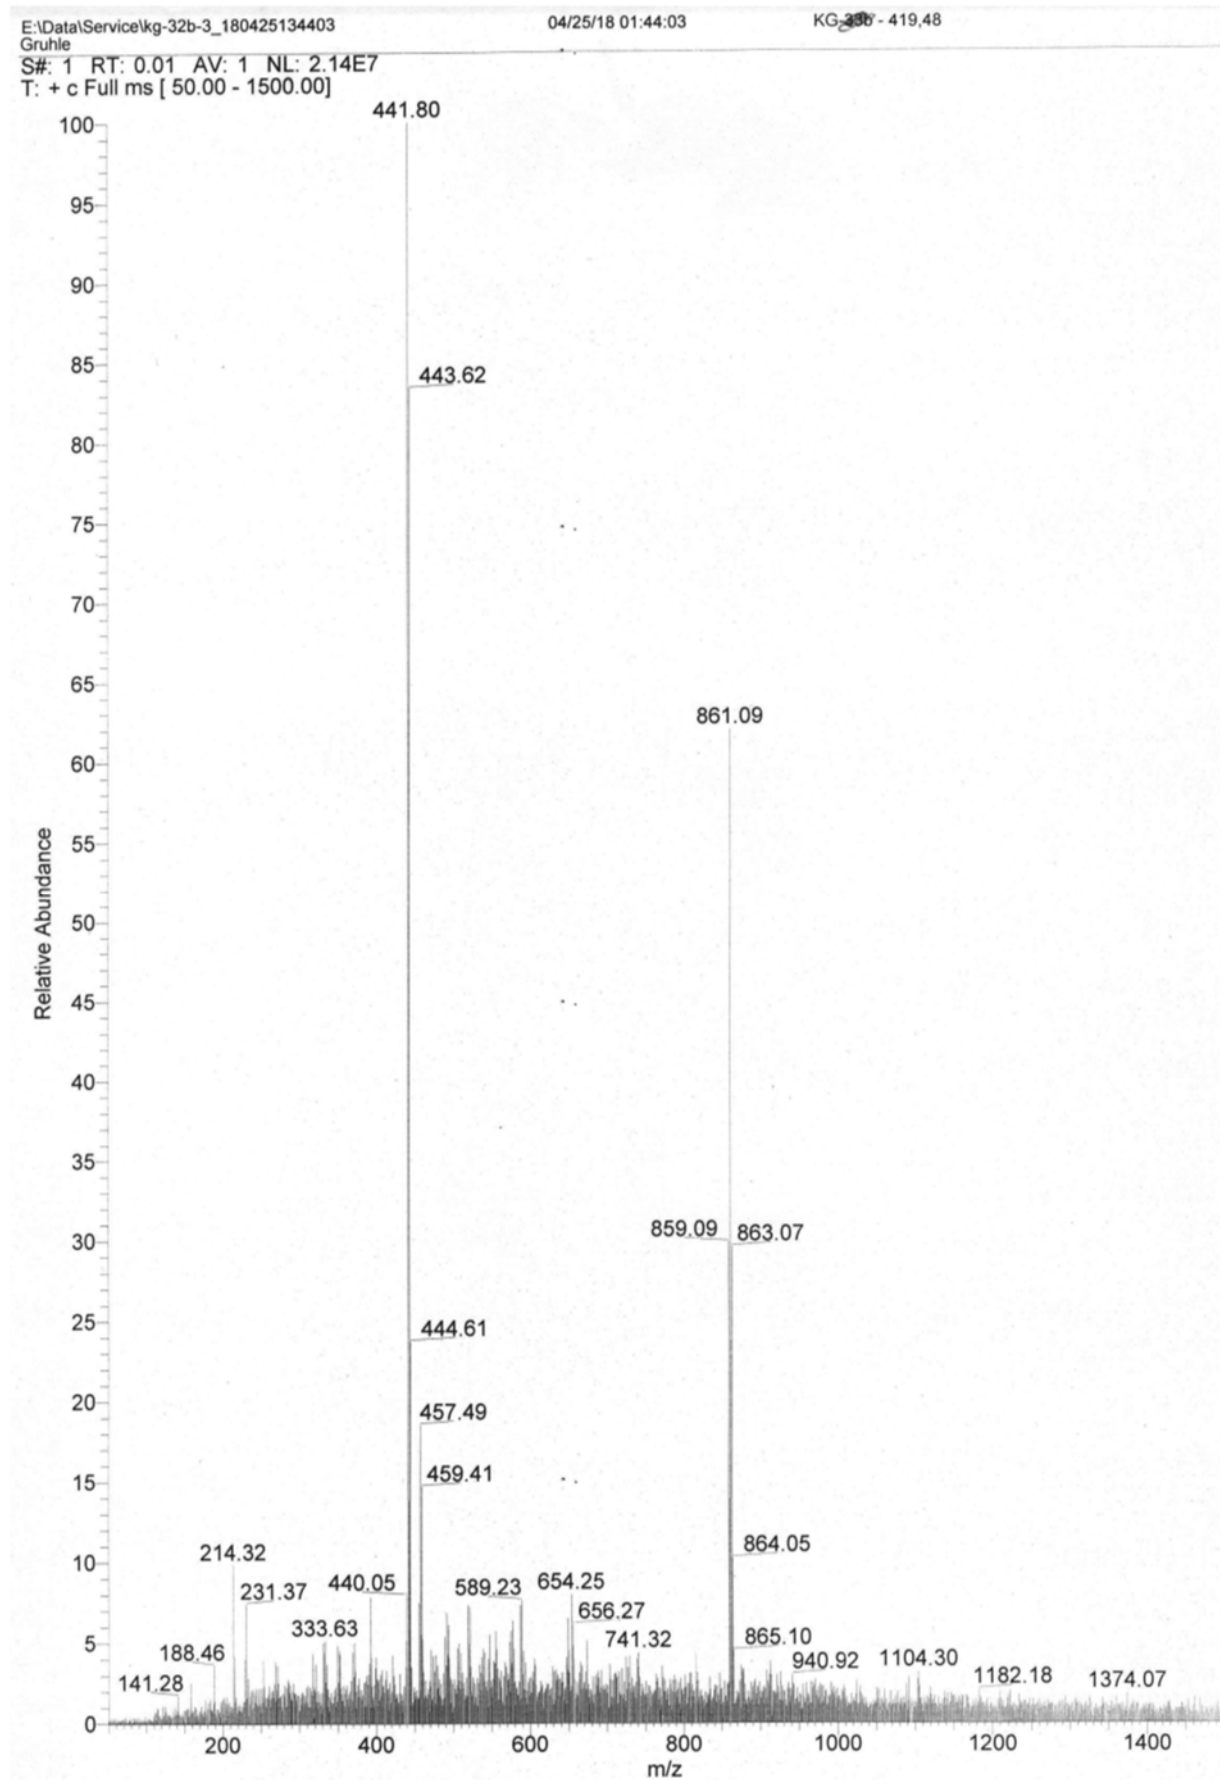

# Organic & Biomolecular Chemistry

## Compound 5e - $^1\text{H}$ NMR

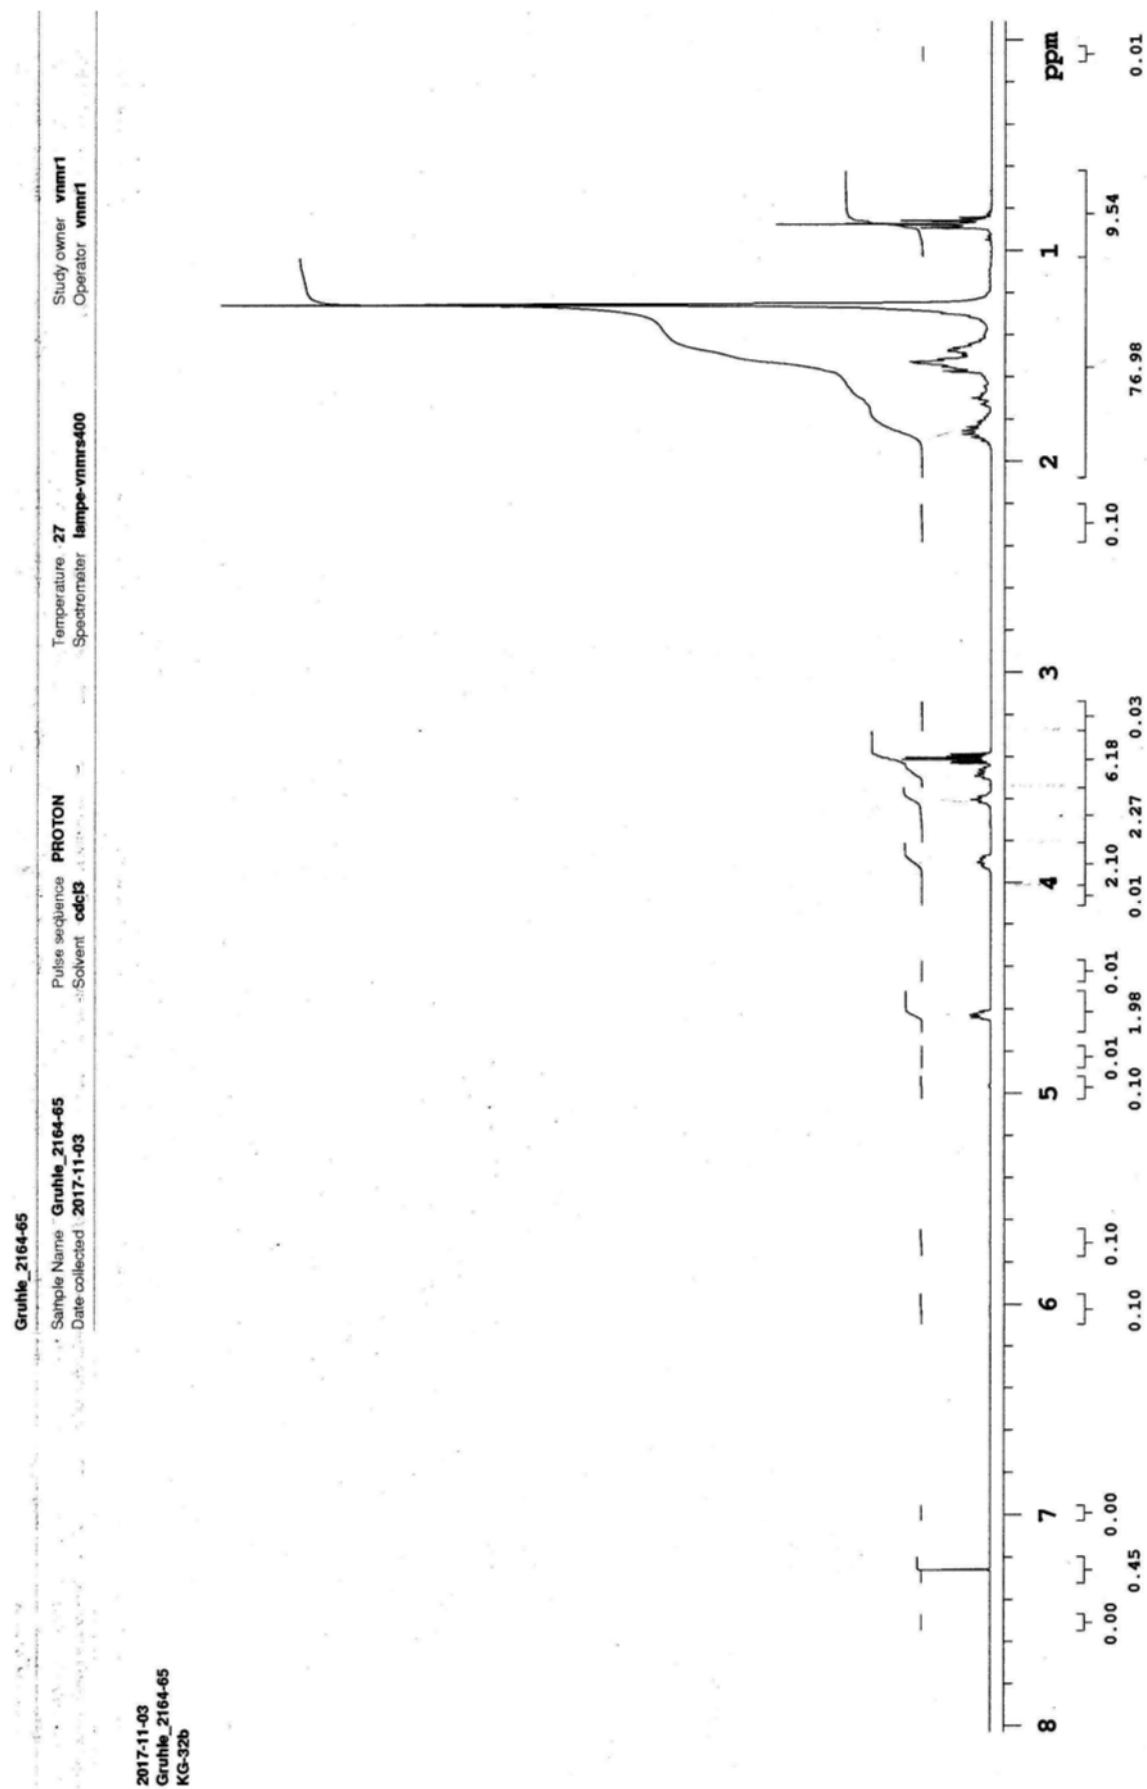

# Organic & Biomolecular Chemistry

Compound 5e –  $^{13}\text{C}$  NMR

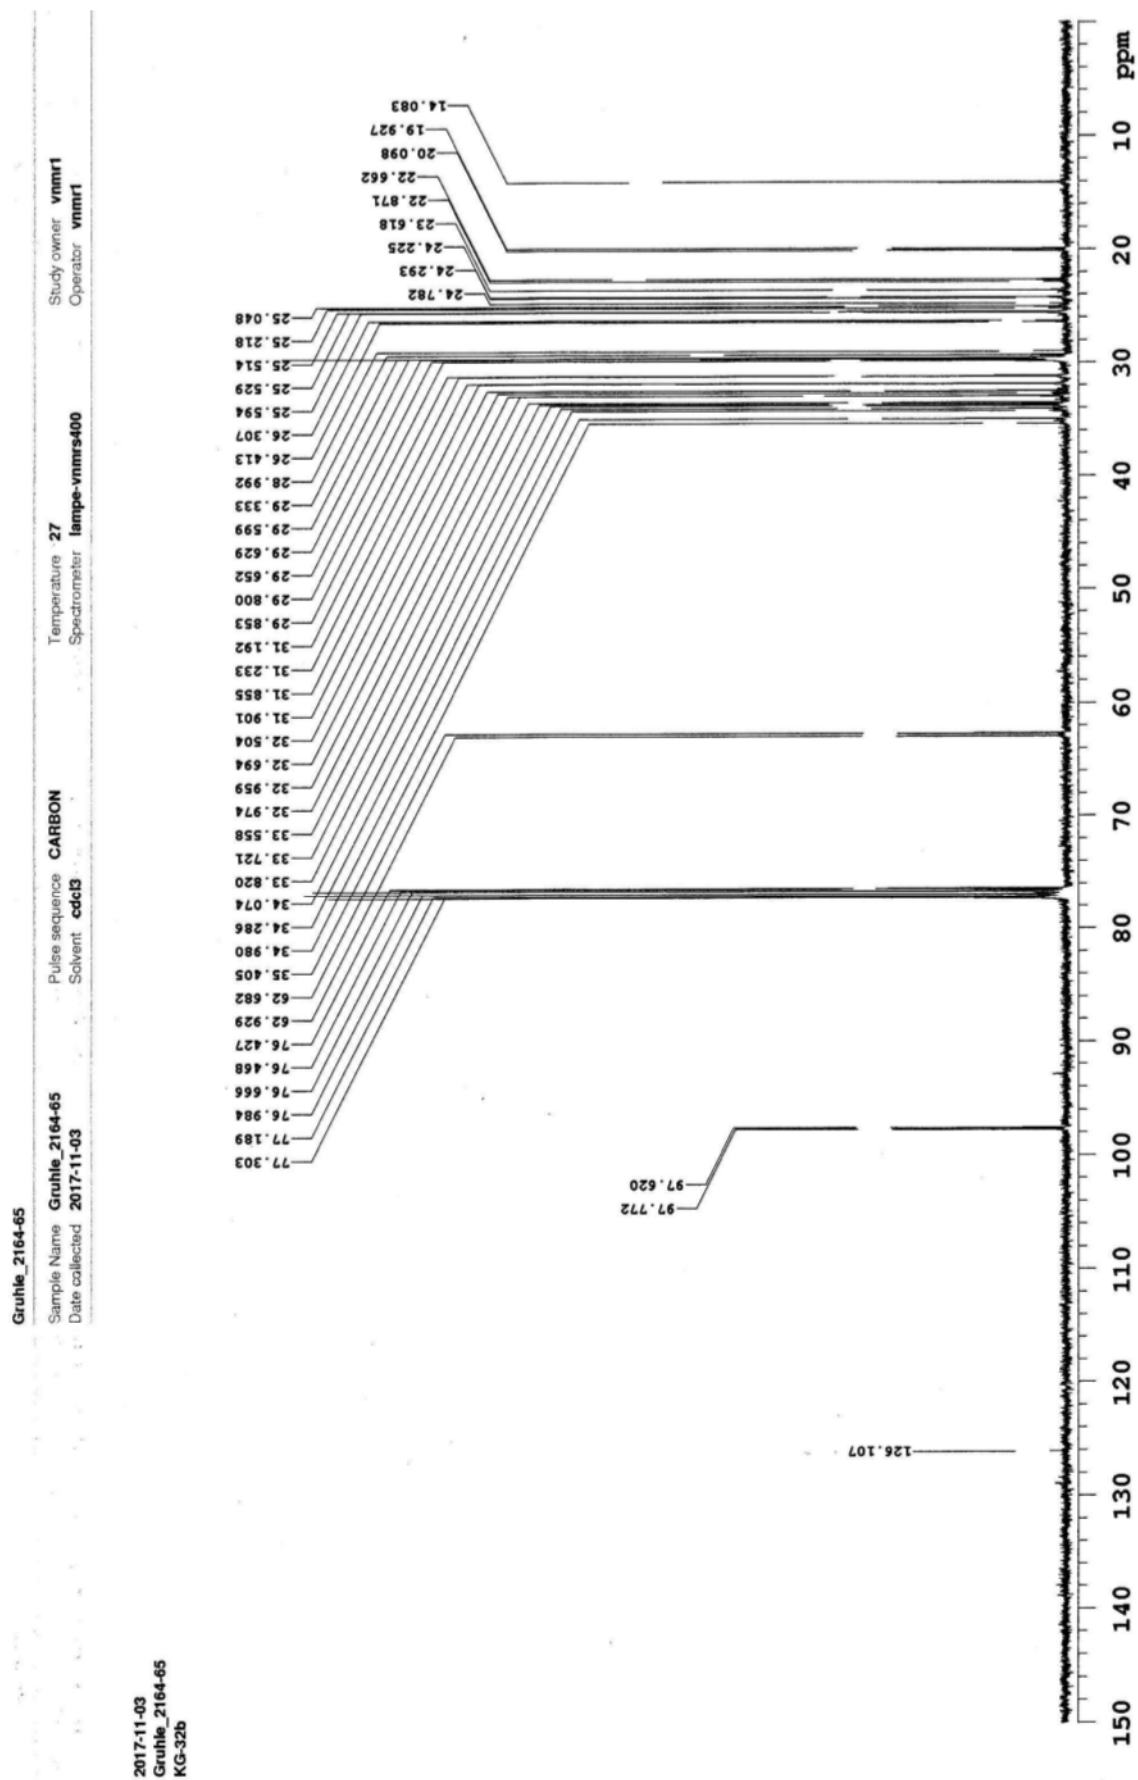

# Organic & Biomolecular Chemistry

Compound 5f – ESI-MS (positive mode)

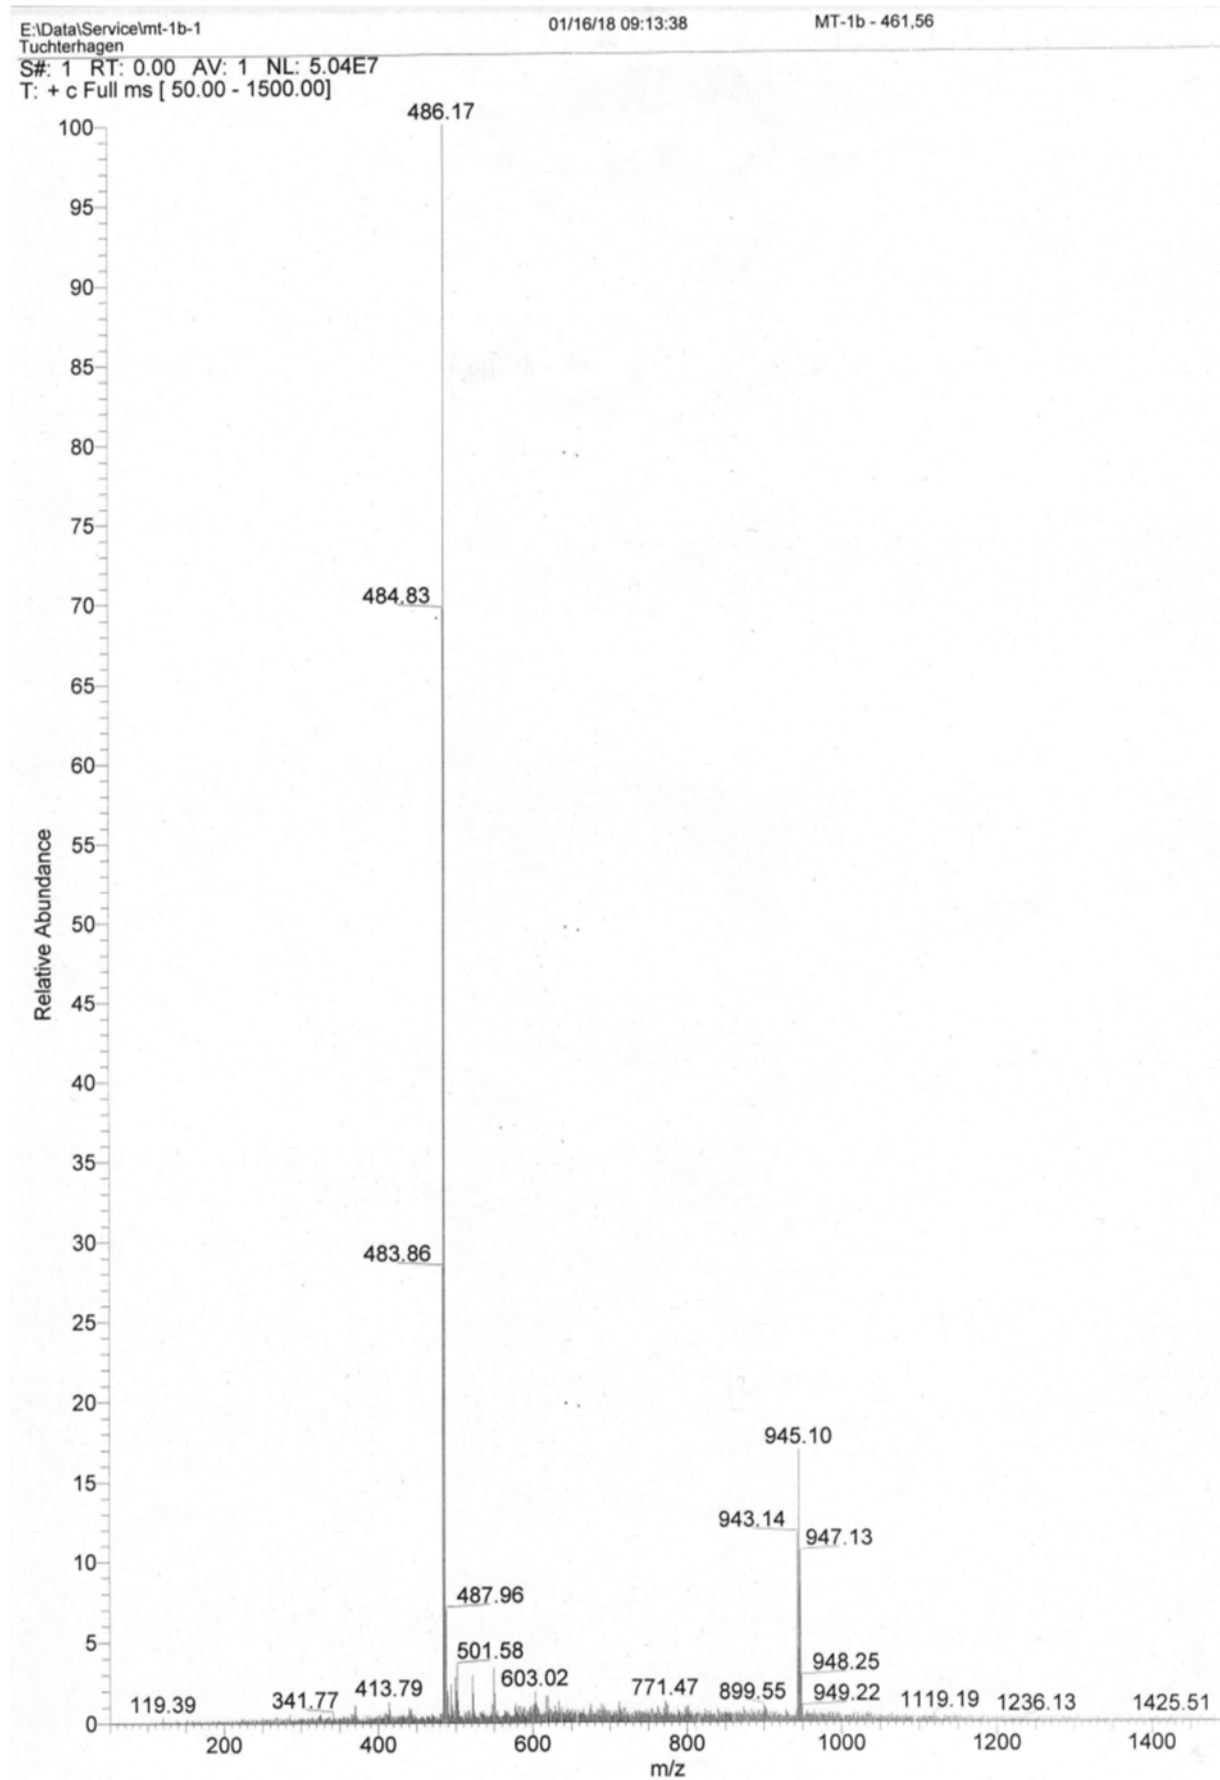

# Organic & Biomolecular Chemistry

## Compound 5f - $^1\text{H}$ NMR

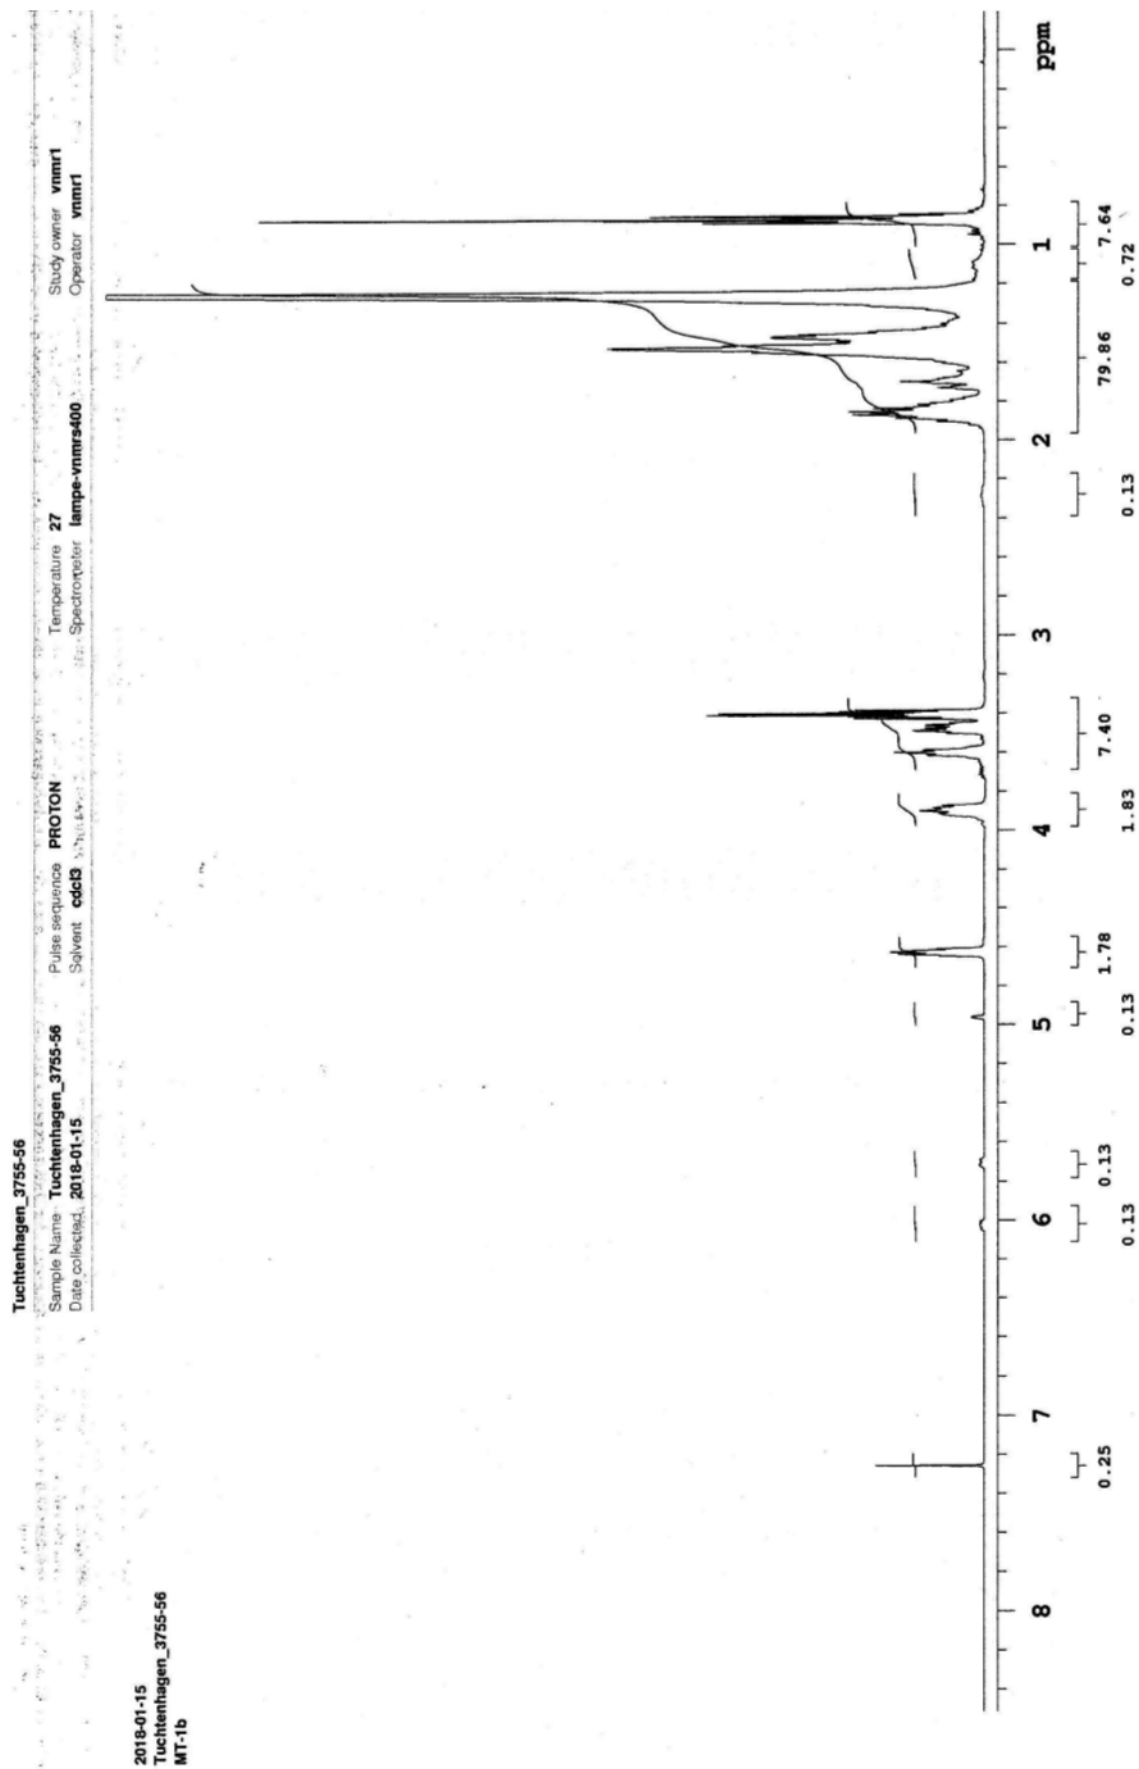

# Organic & Biomolecular Chemistry

## Compound 5f - $^{13}\text{C}$ NMR

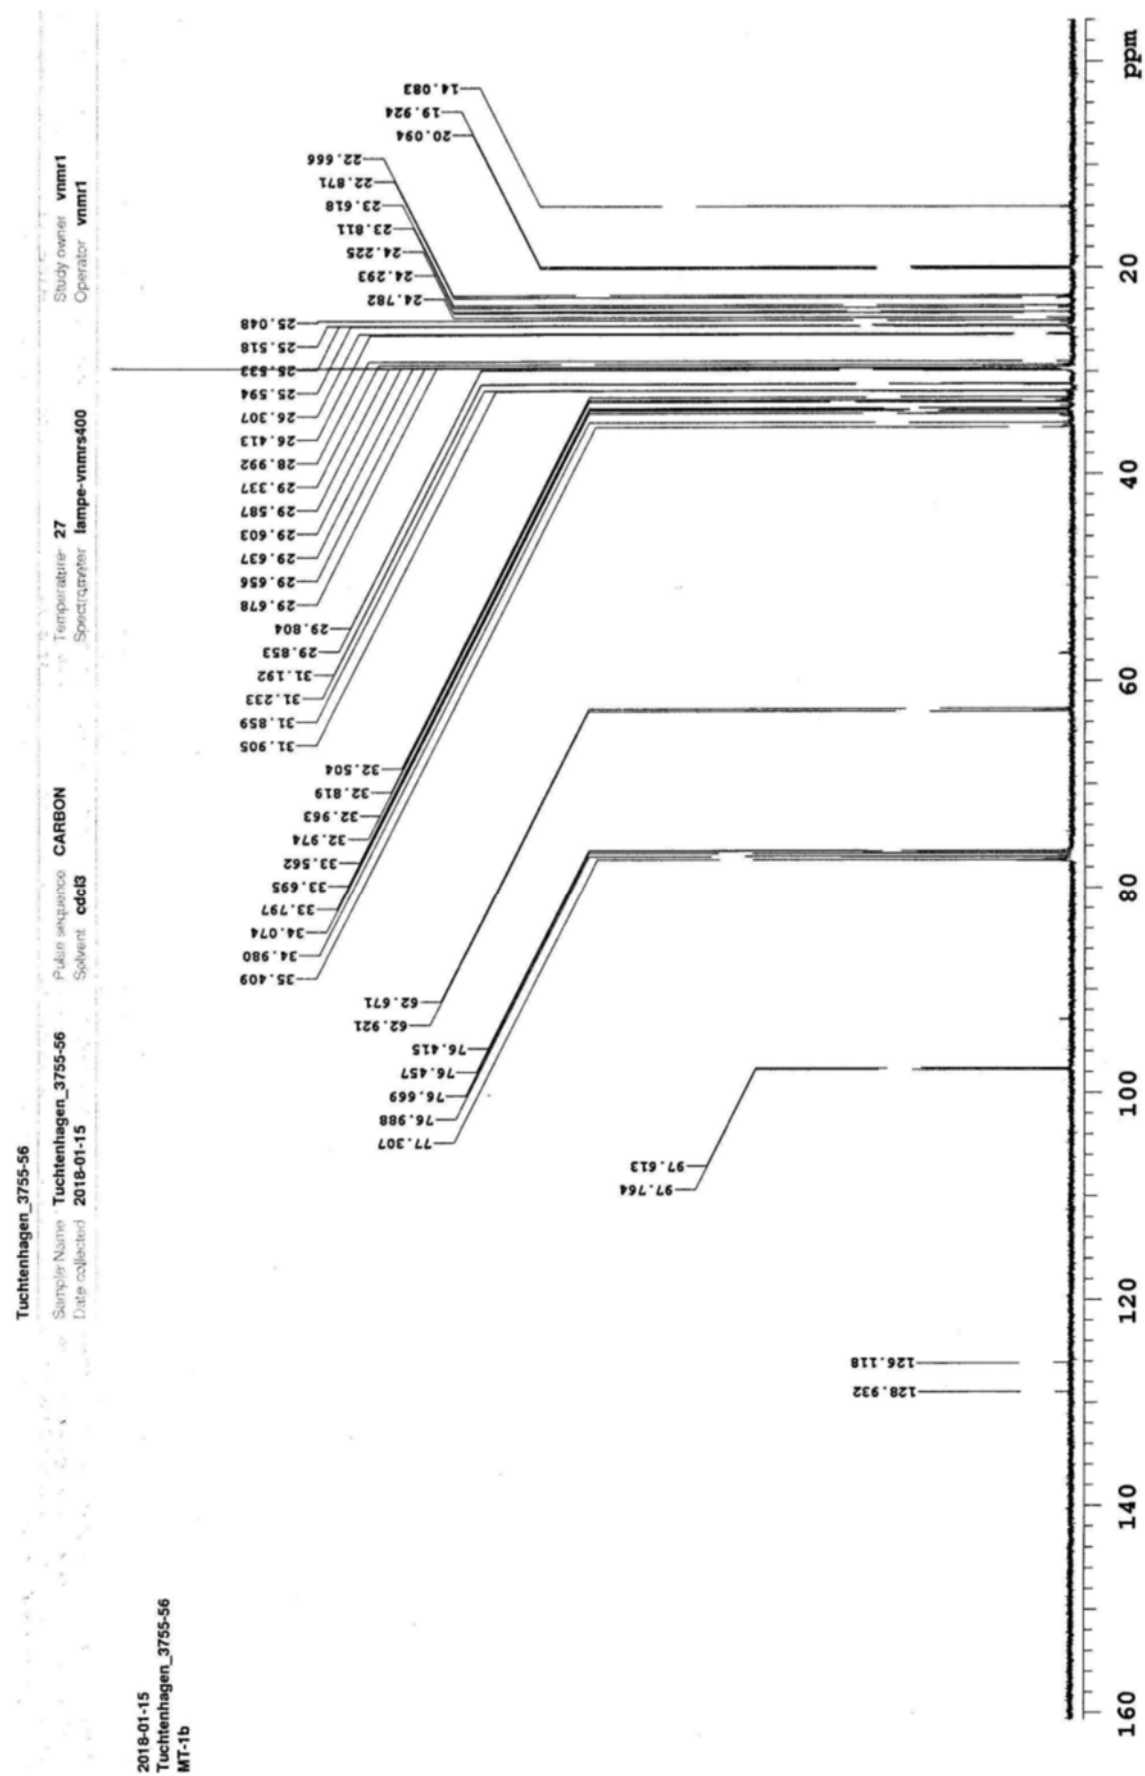



# Organic & Biomolecular Chemistry

Compound **8a** – APCI-MS (positive mode)

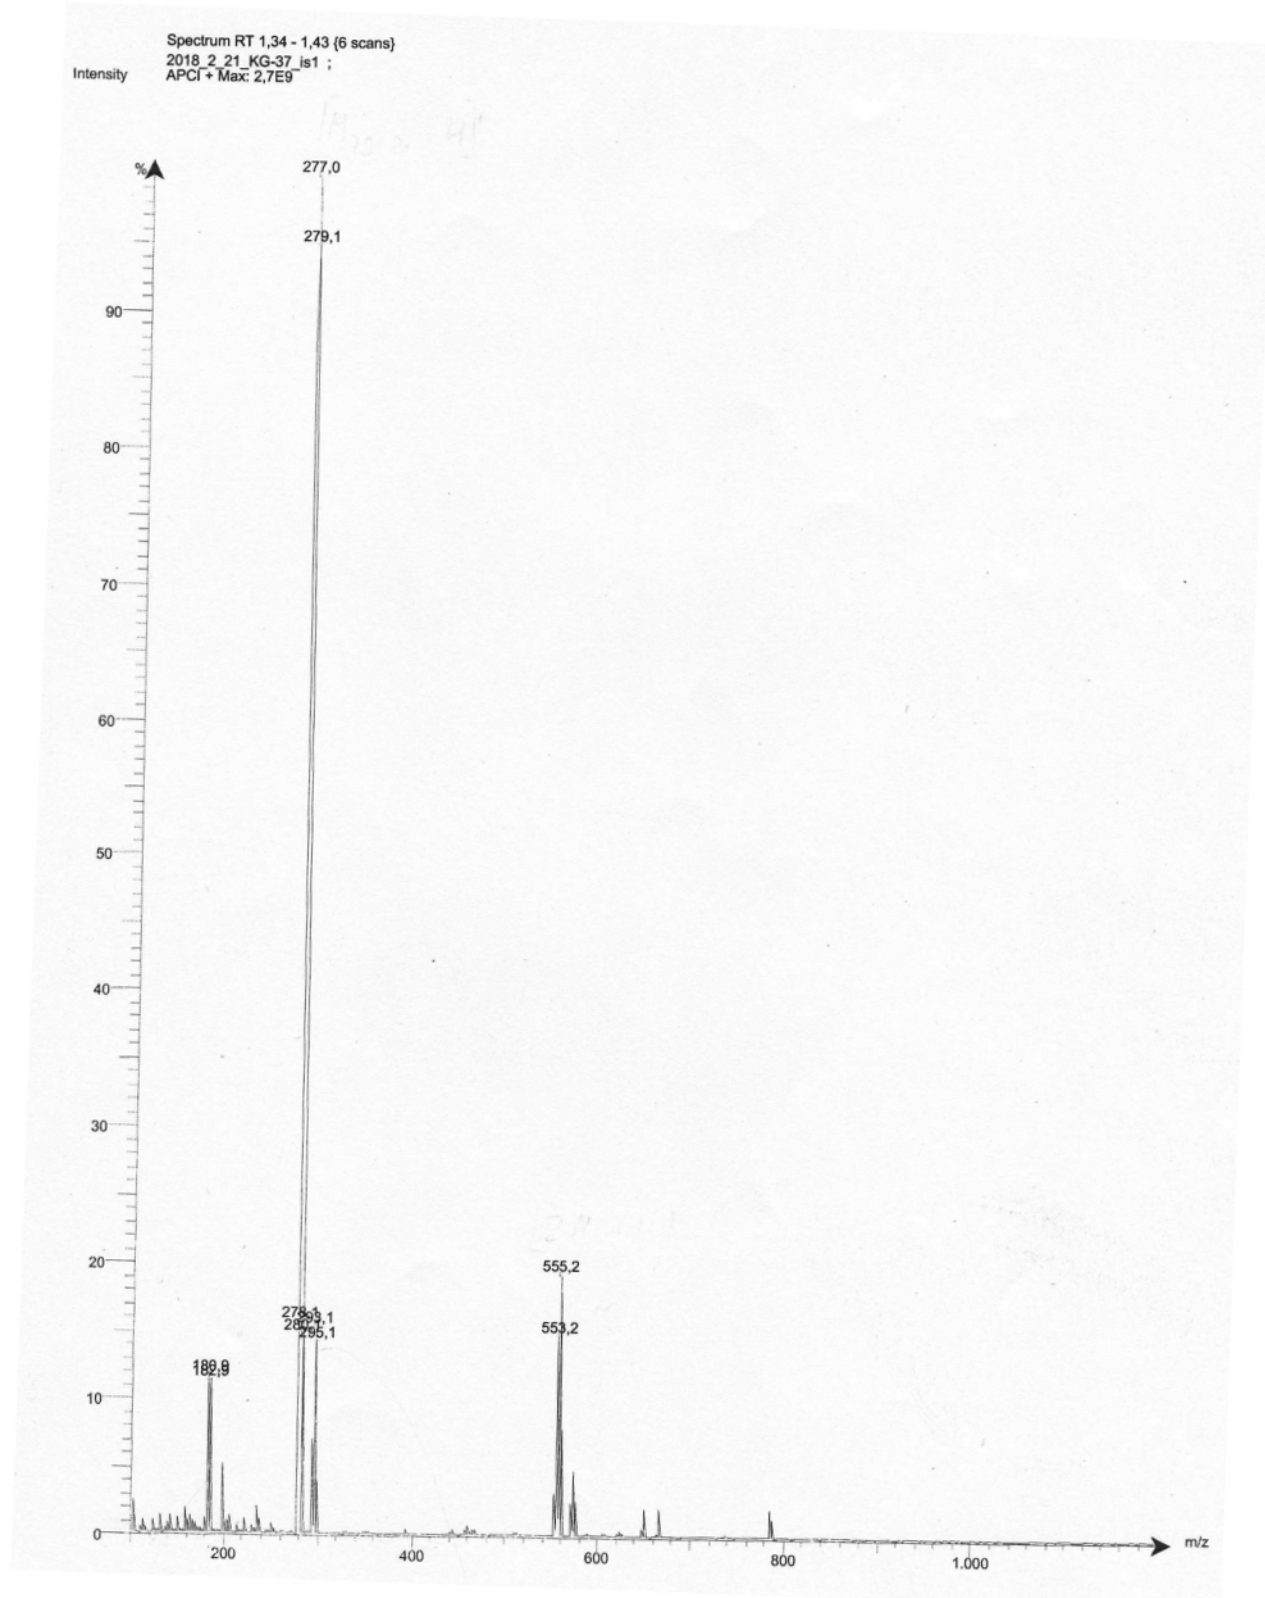

# Organic & Biomolecular Chemistry

## Compound 8a - $^1\text{H}$ NMR

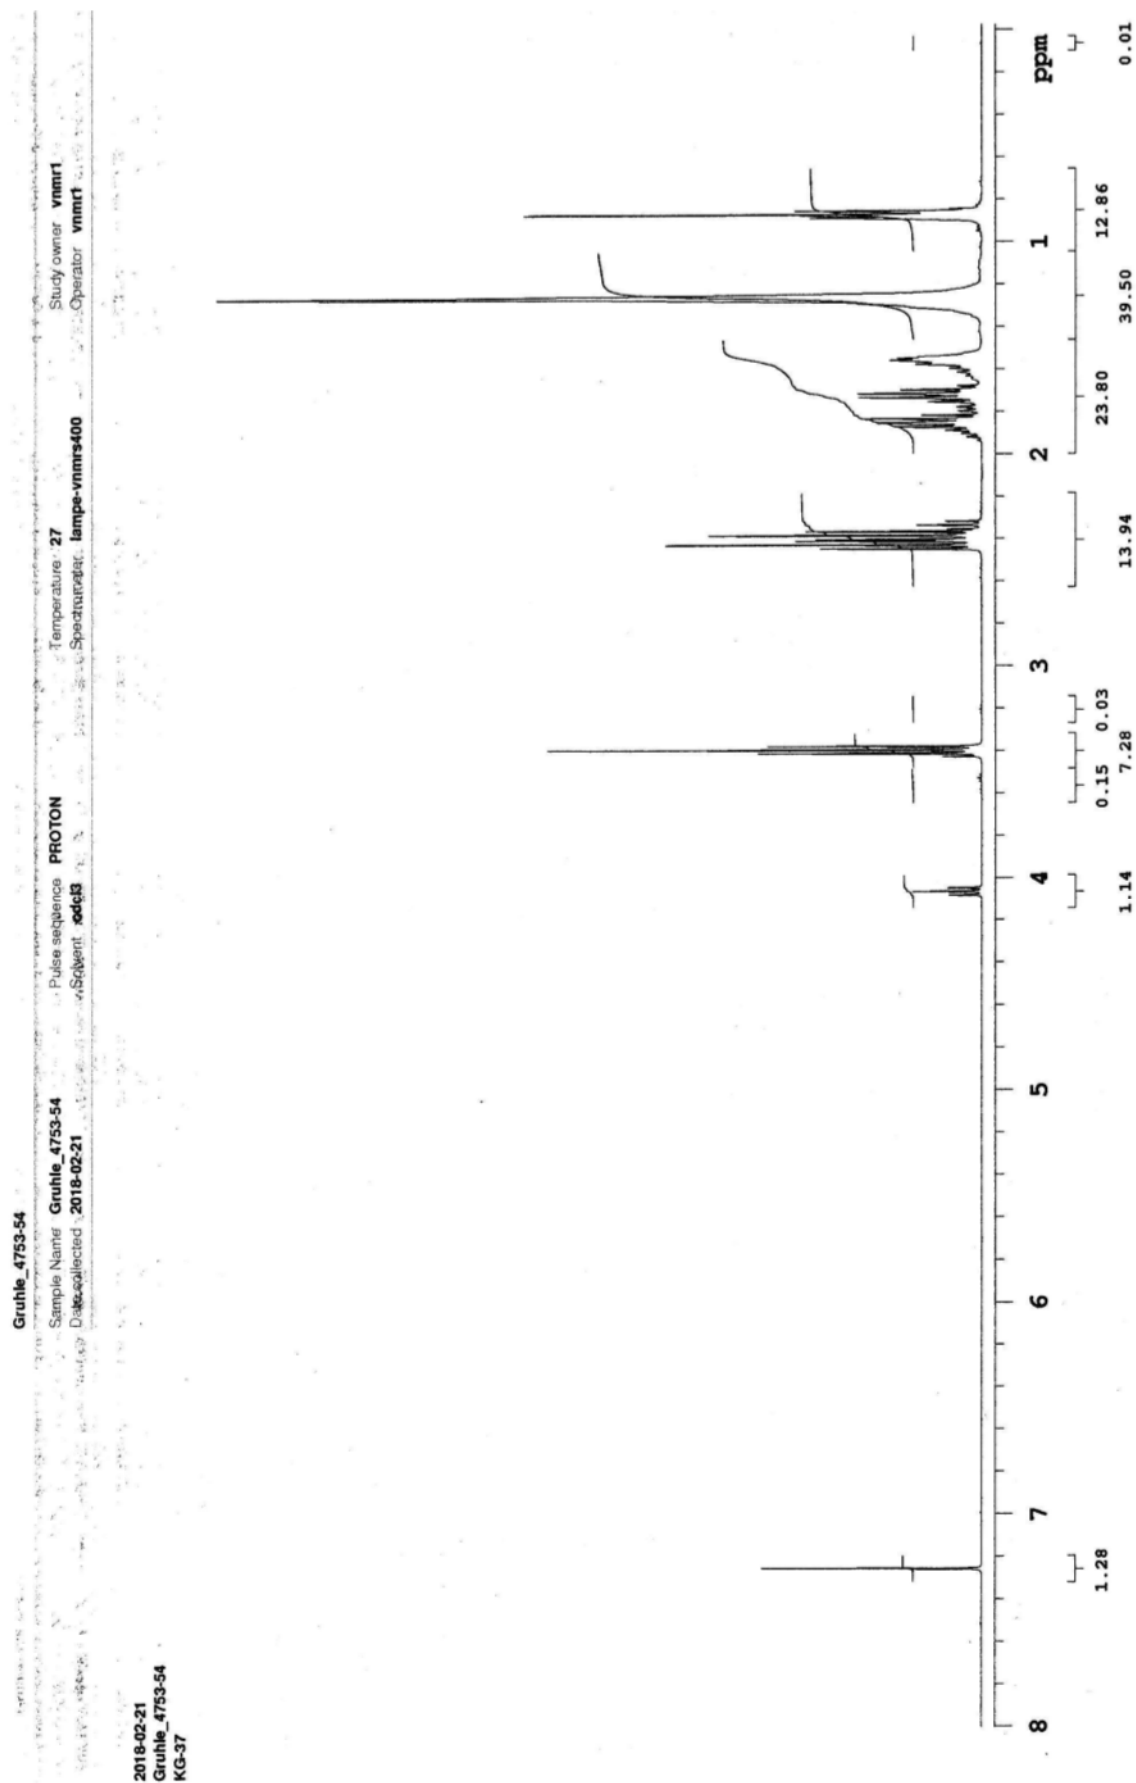

# Organic & Biomolecular Chemistry

## Compound 8a - $^{13}\text{C}$ NMR

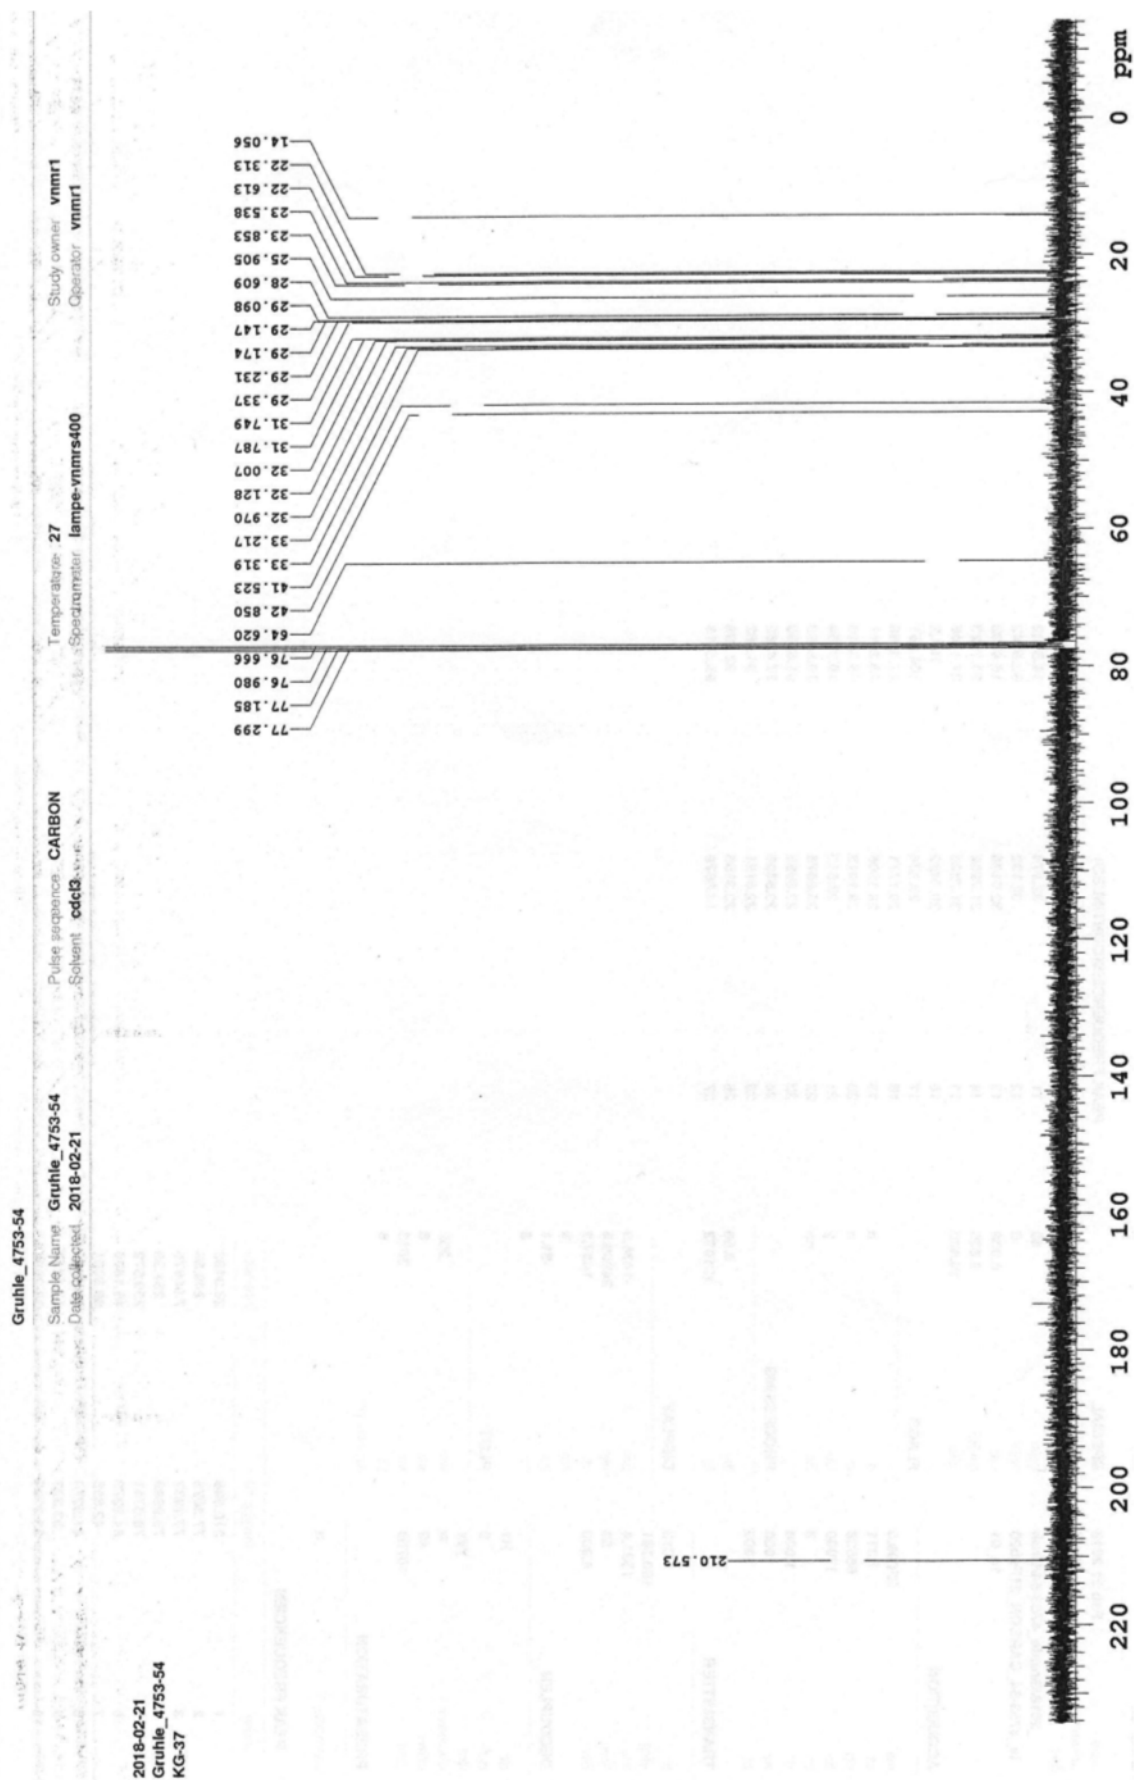

# Organic & Biomolecular Chemistry

Compound 8b – APCI-MS (positive mode)

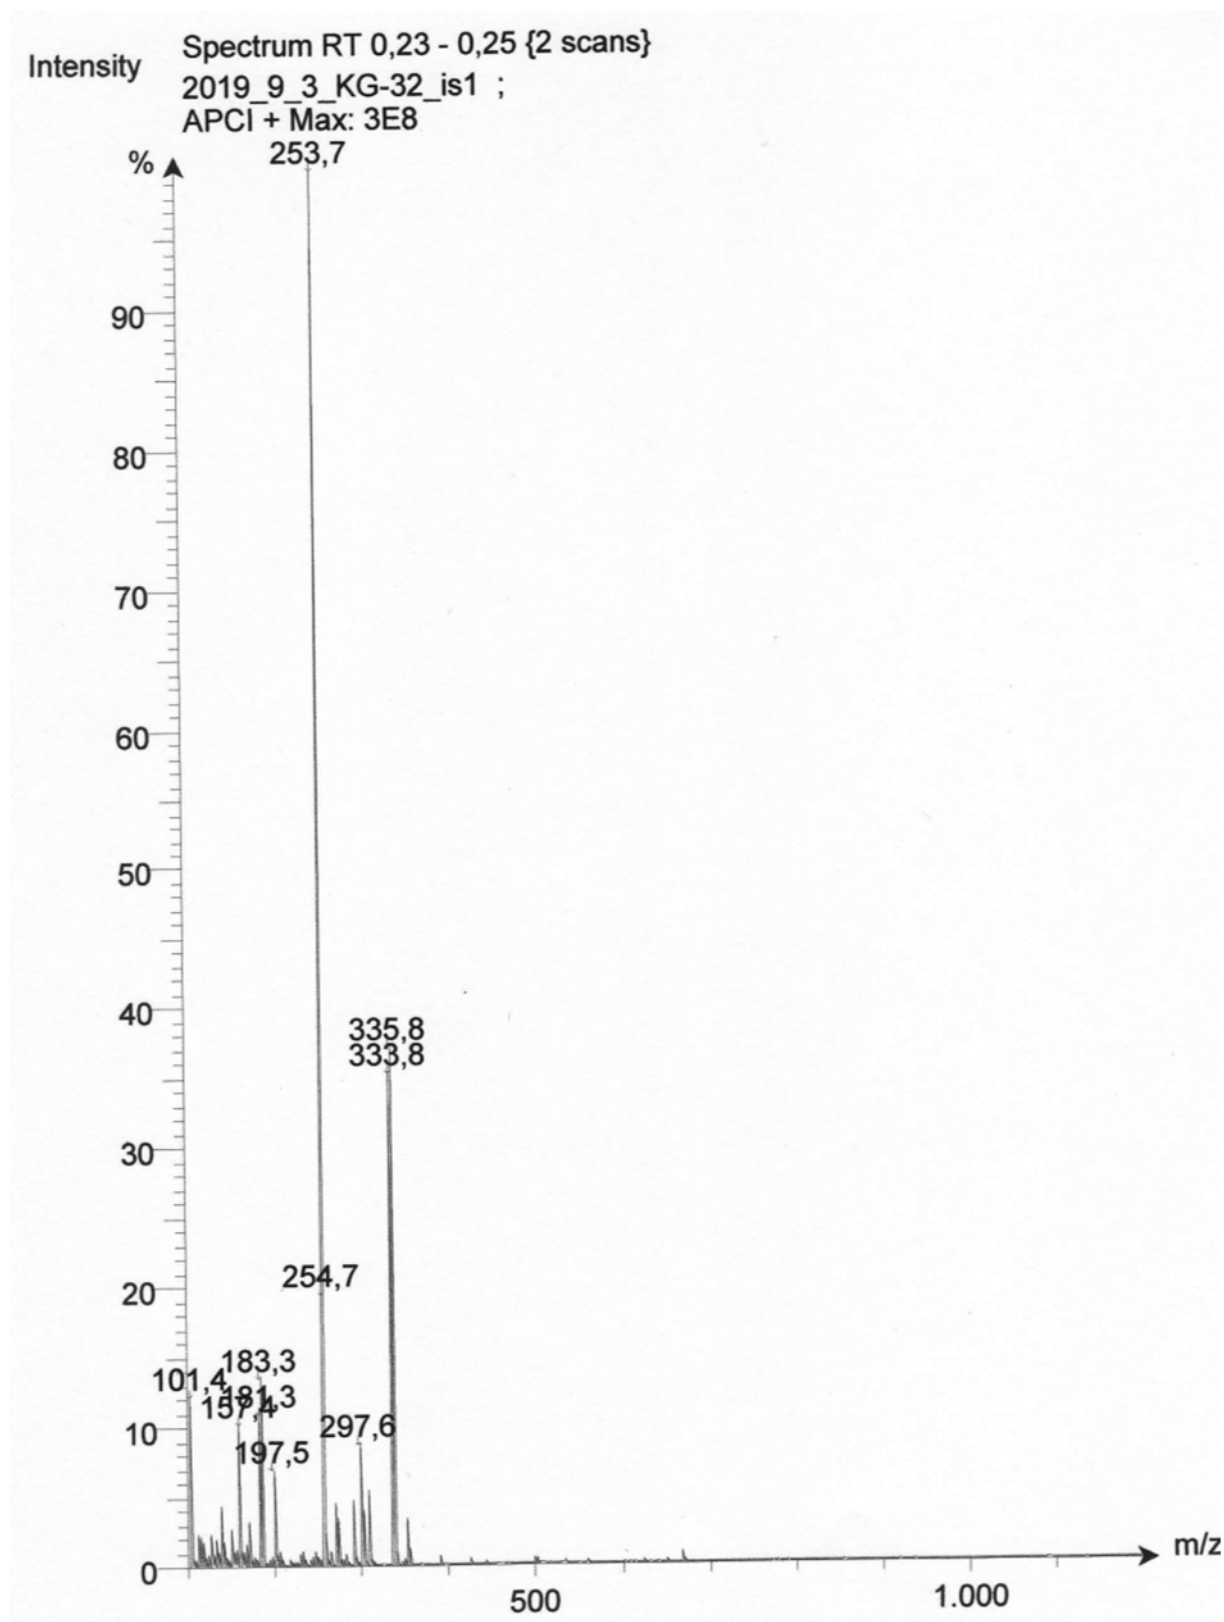

# Organic & Biomolecular Chemistry

Compound 8b -  $^1\text{H}$  NMR

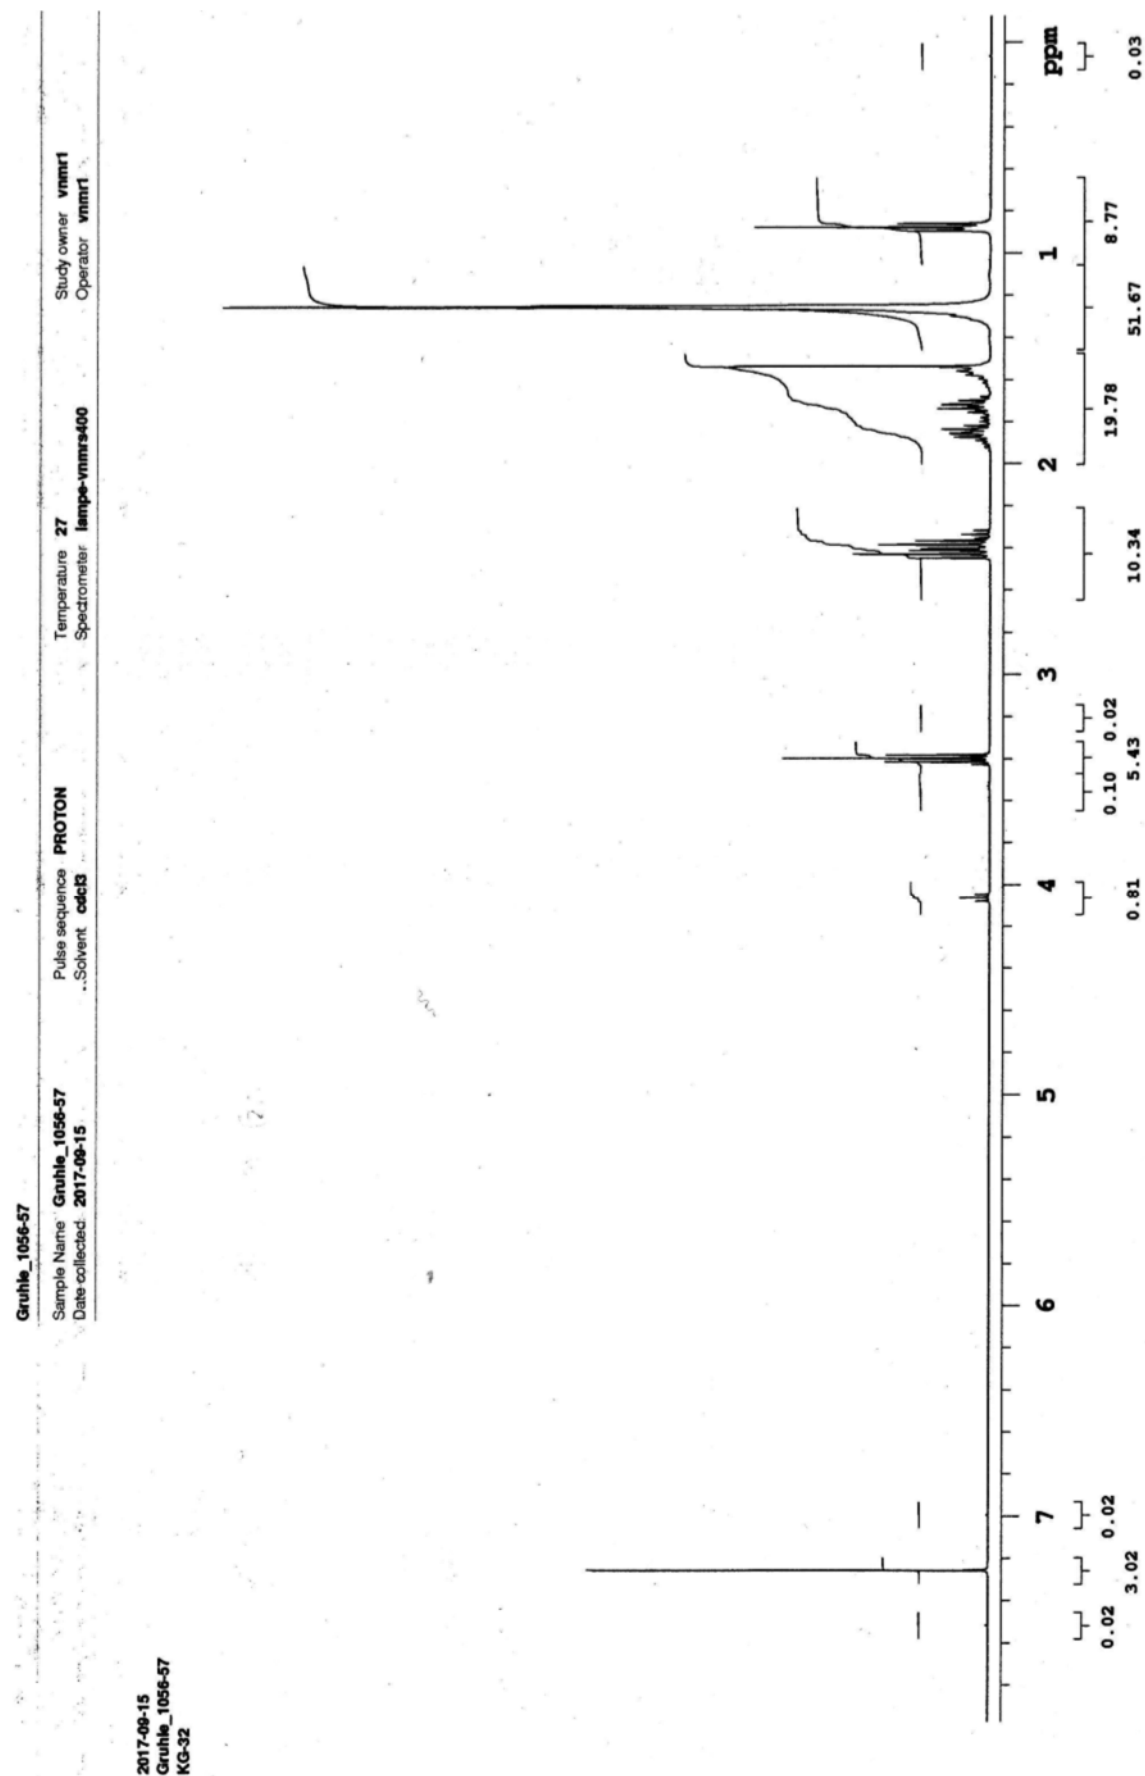

# Organic & Biomolecular Chemistry

## Compound 8b - $^{13}\text{C}$ NMR

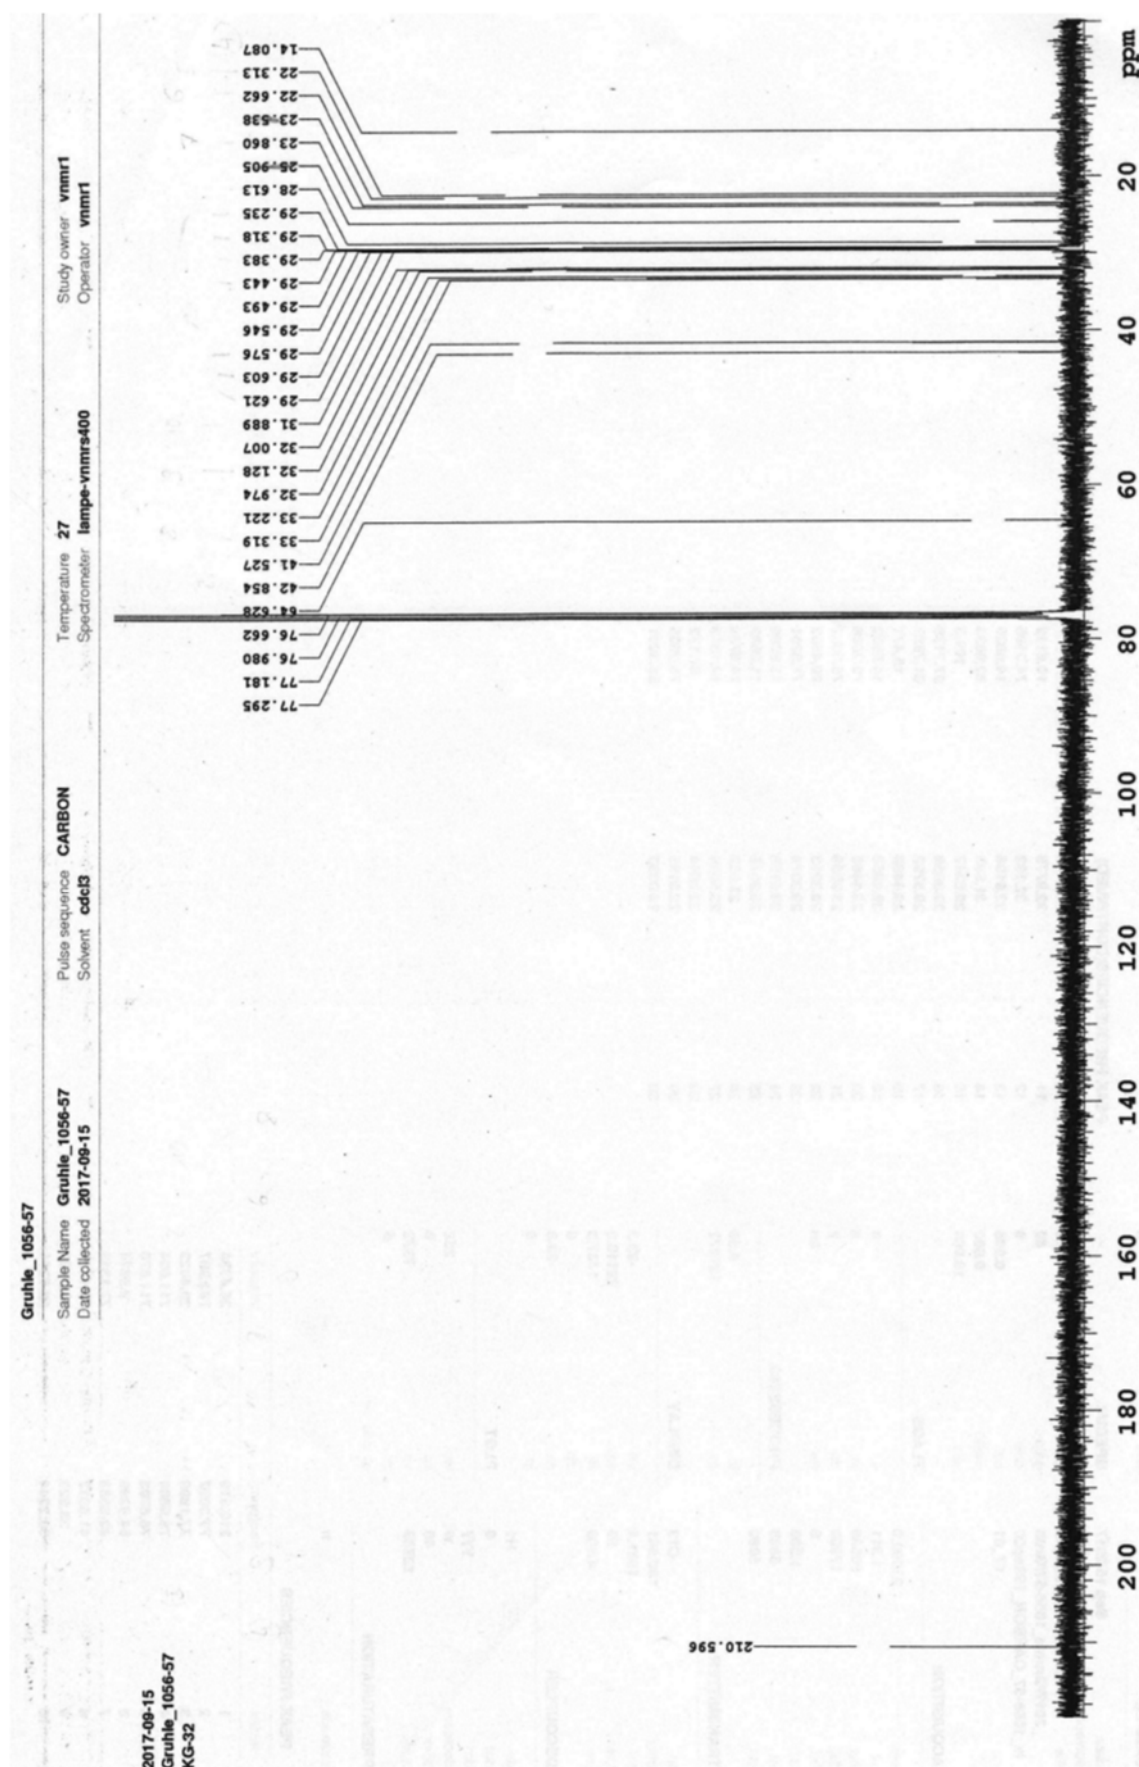

# Organic & Biomolecular Chemistry

Compound 8c – APCI-MS (positive mode)

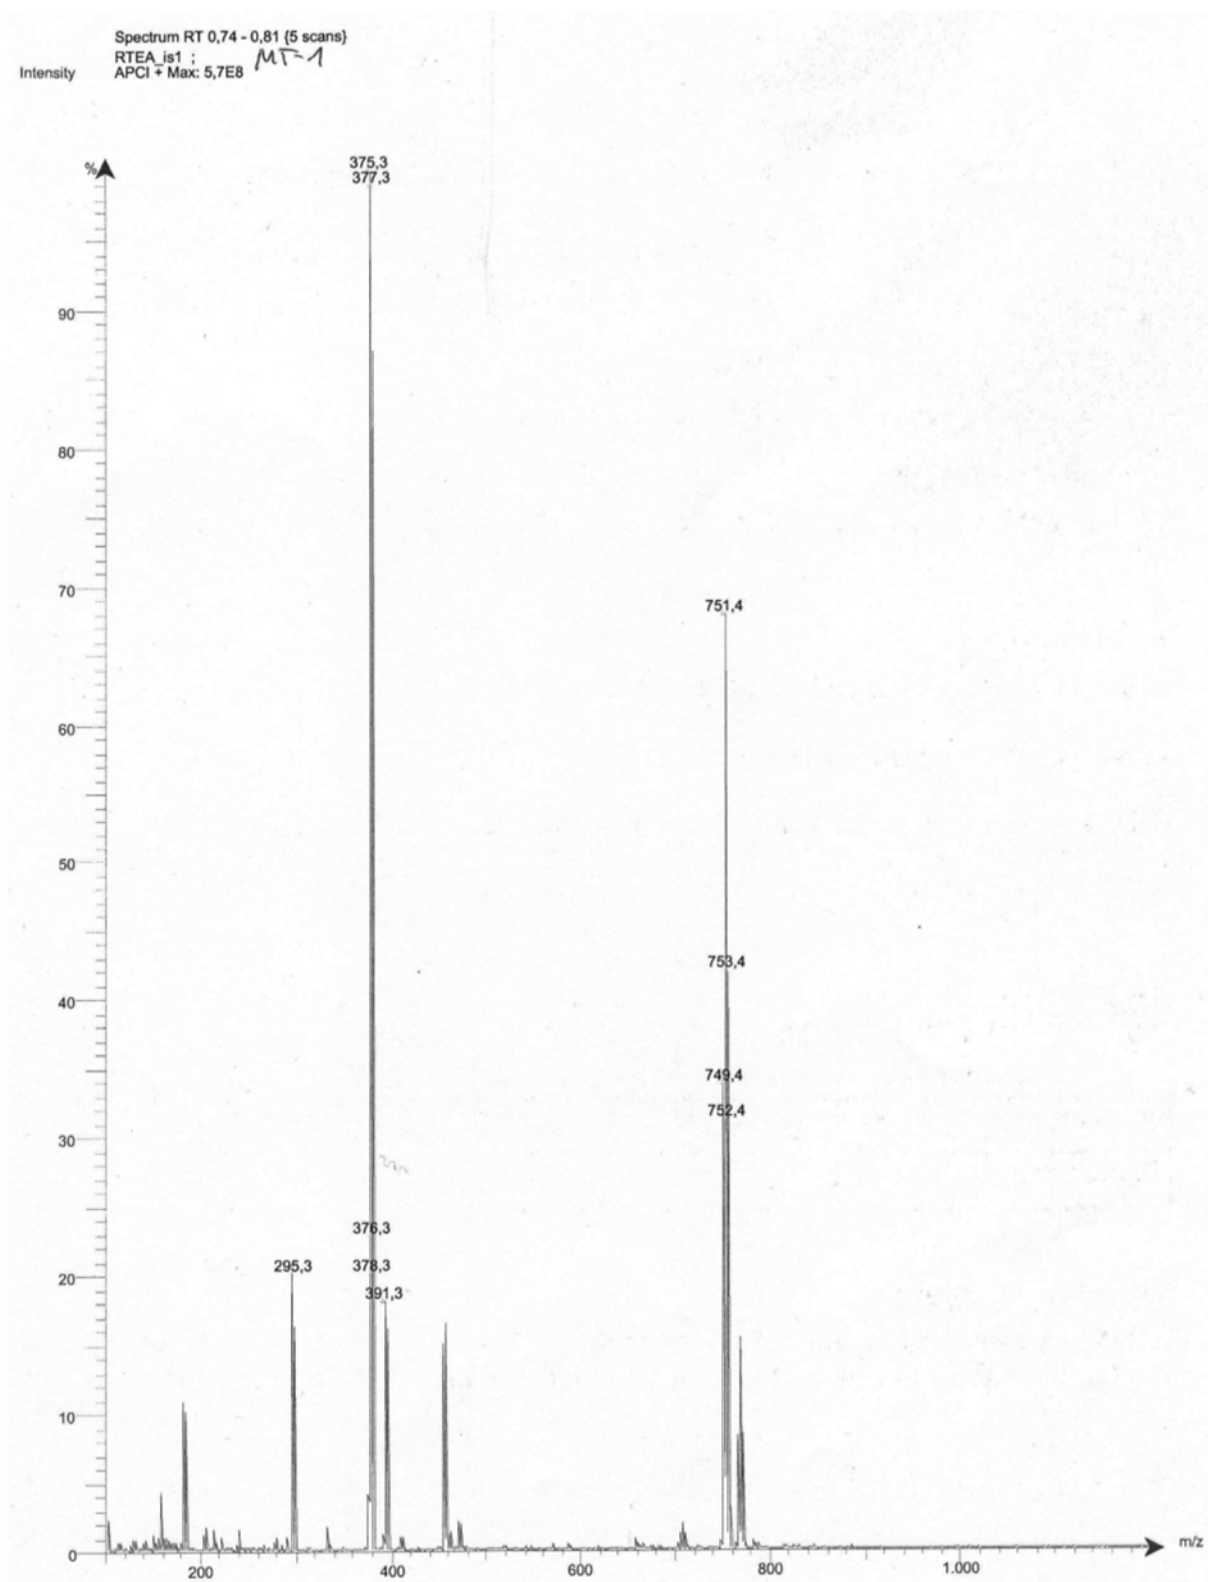

# Organic & Biomolecular Chemistry

Compound 8c -  $^1\text{H}$  NMR

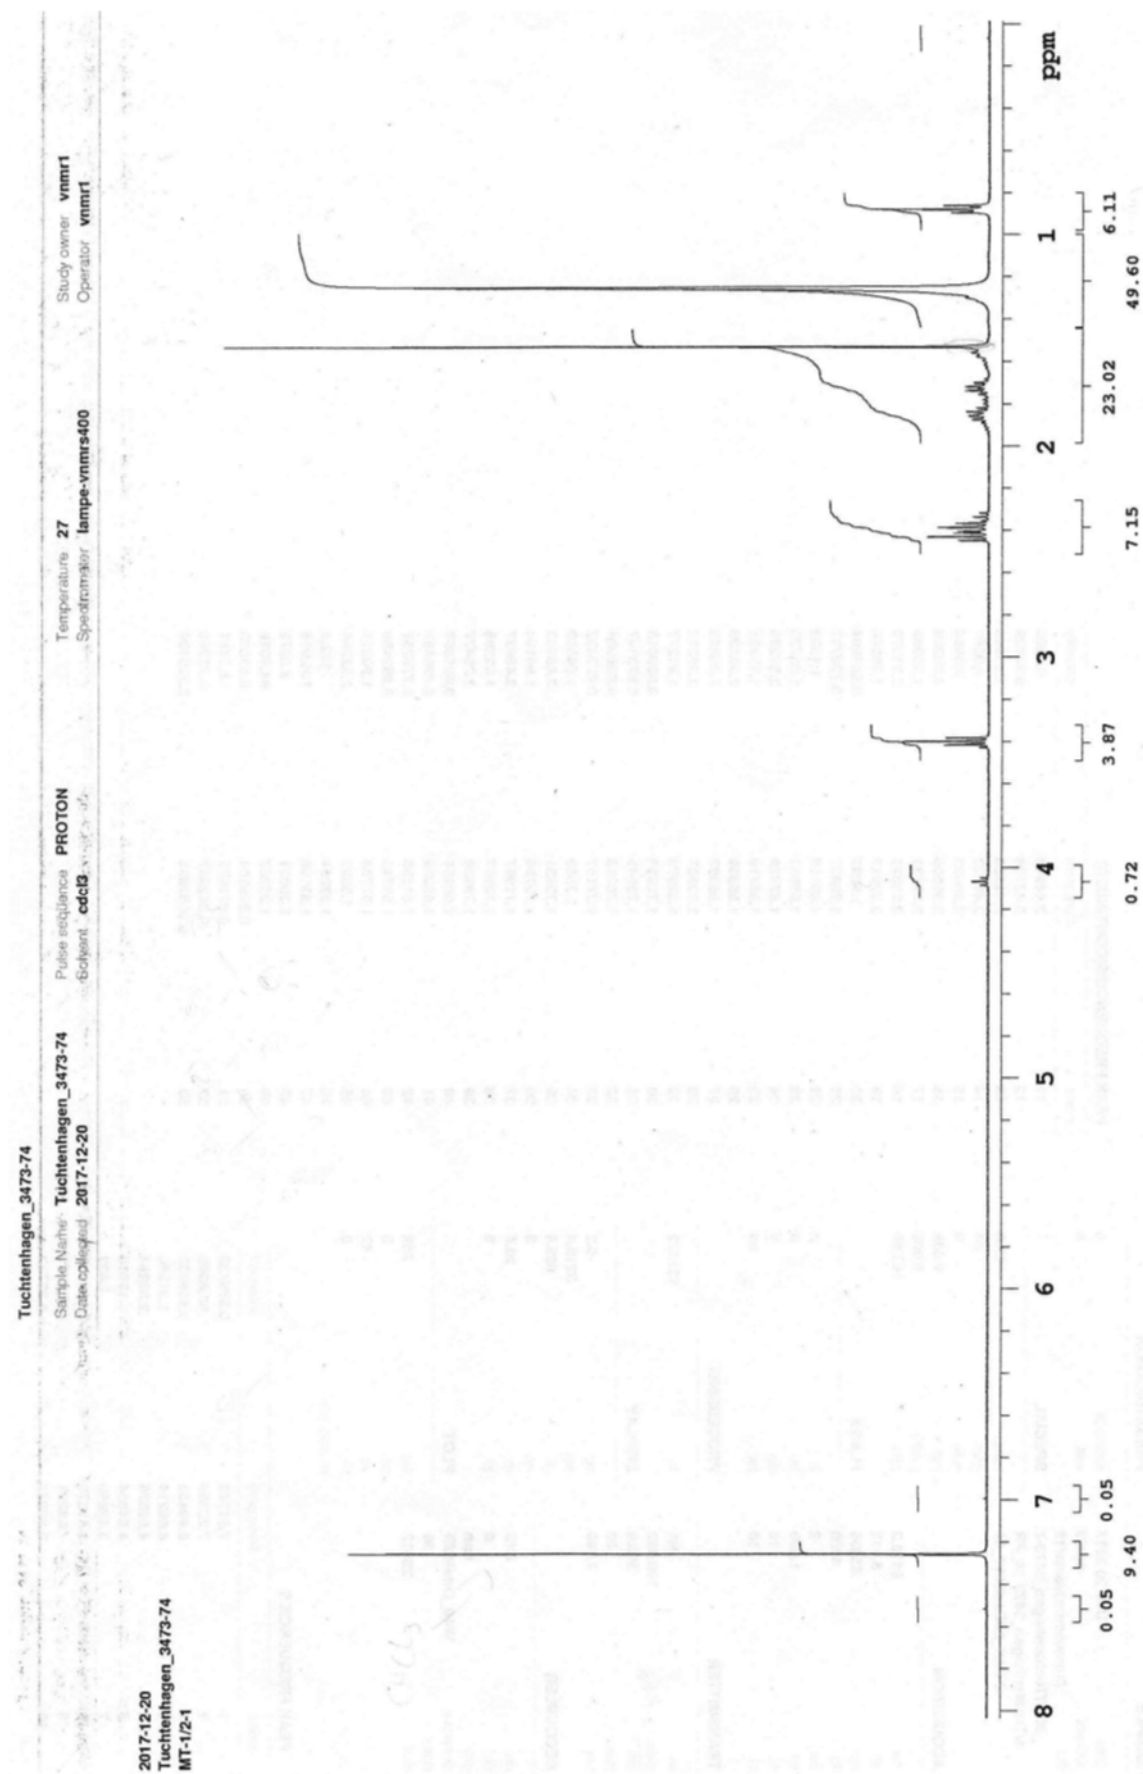



# Organic & Biomolecular Chemistry

Compound 8c –  $^{13}\text{C}$  NMR

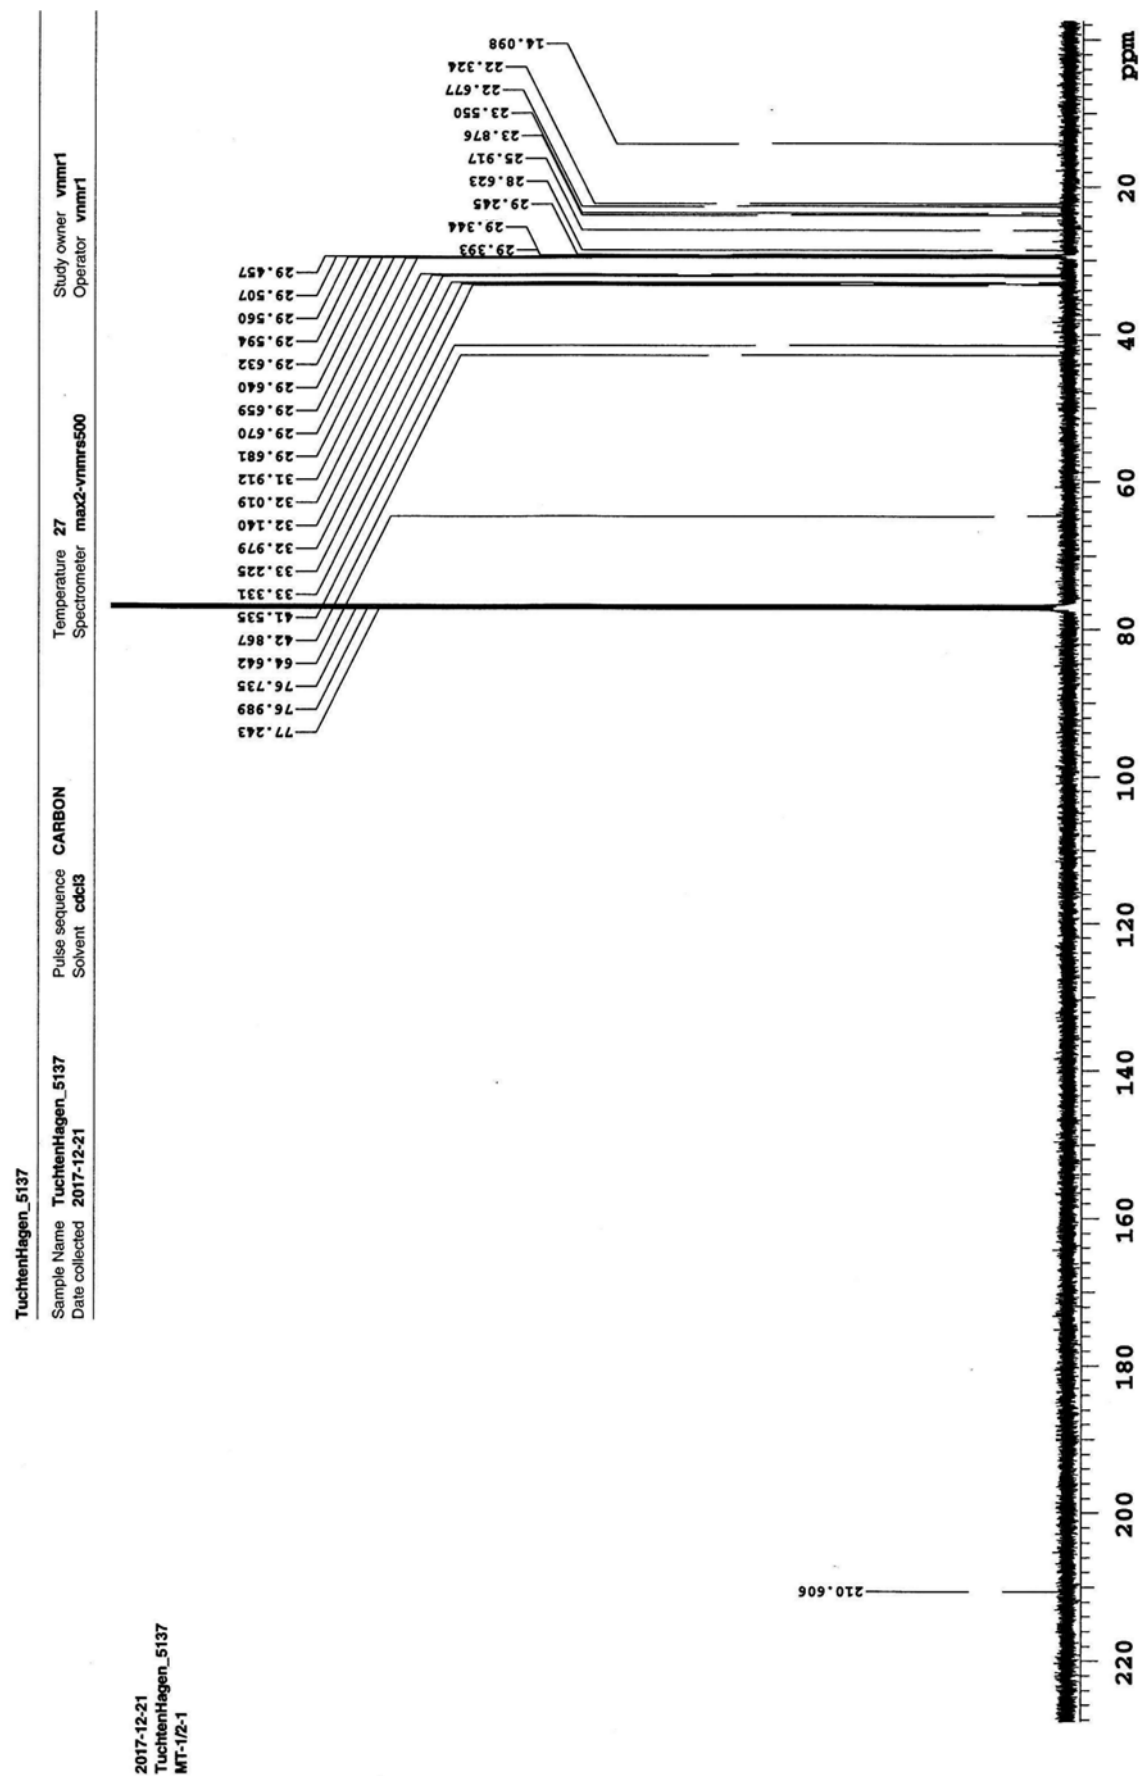

2017-12-21  
TuchentHagen\_5137  
MT-1/2-1

# Organic & Biomolecular Chemistry

Compound **9a** – ESI-MS (positive mode)

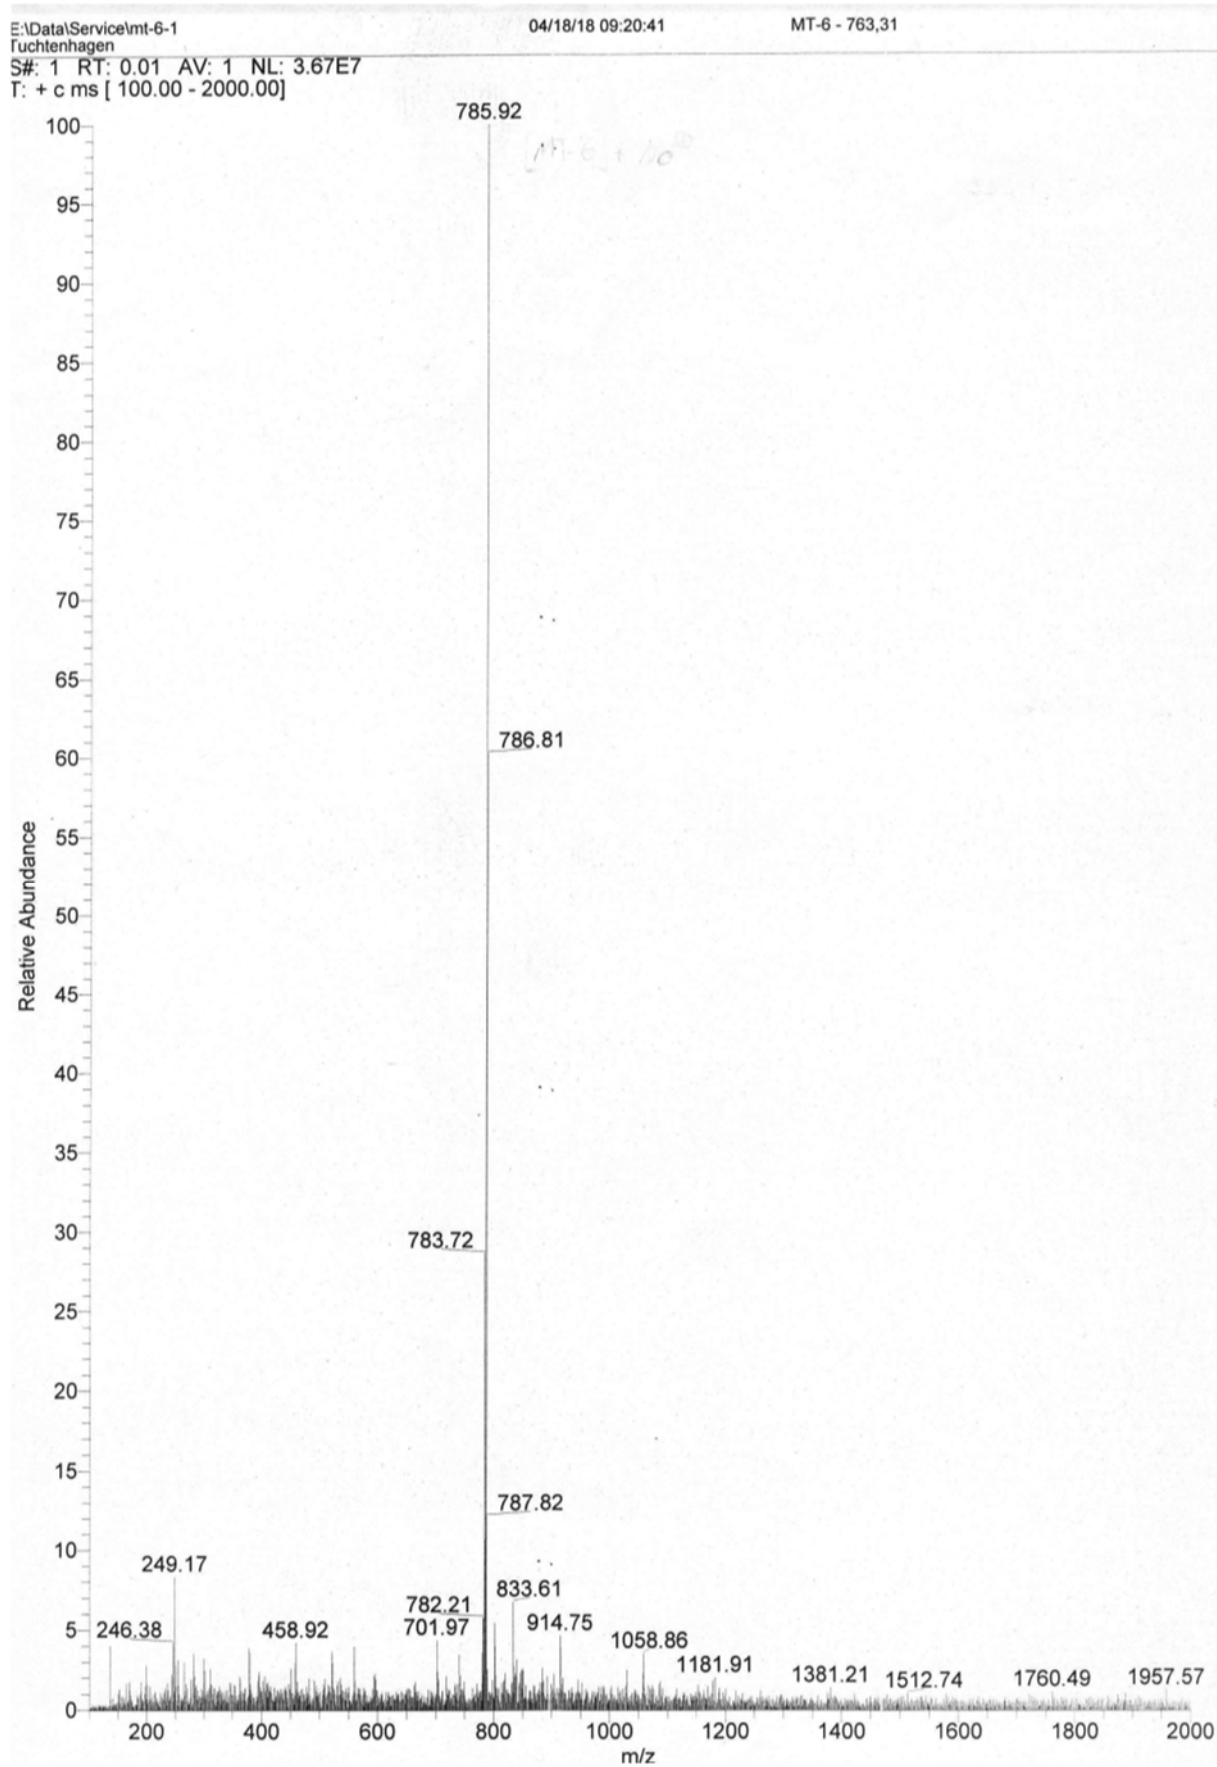

# Organic & Biomolecular Chemistry

Compound 9a -  $^1\text{H}$  NMR

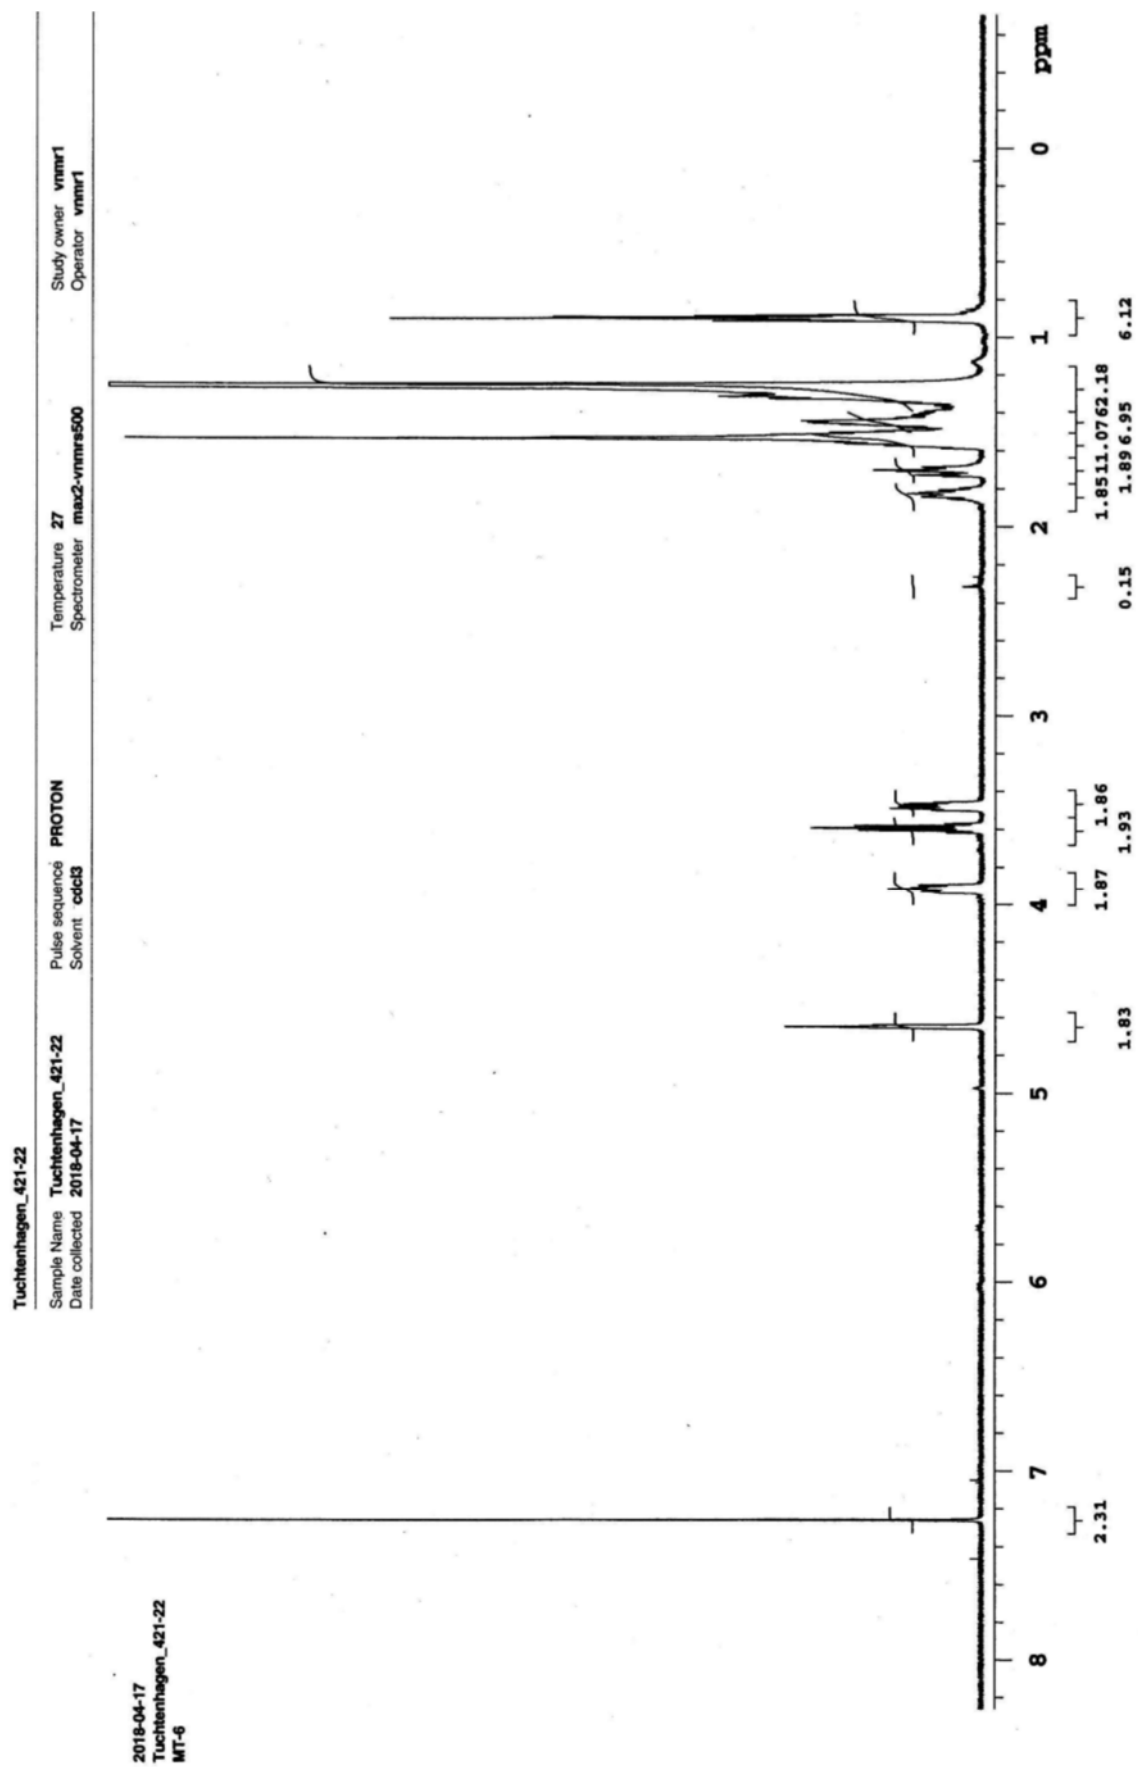

# Organic & Biomolecular Chemistry

Compound 9a –  $^{13}\text{C}$  NMR

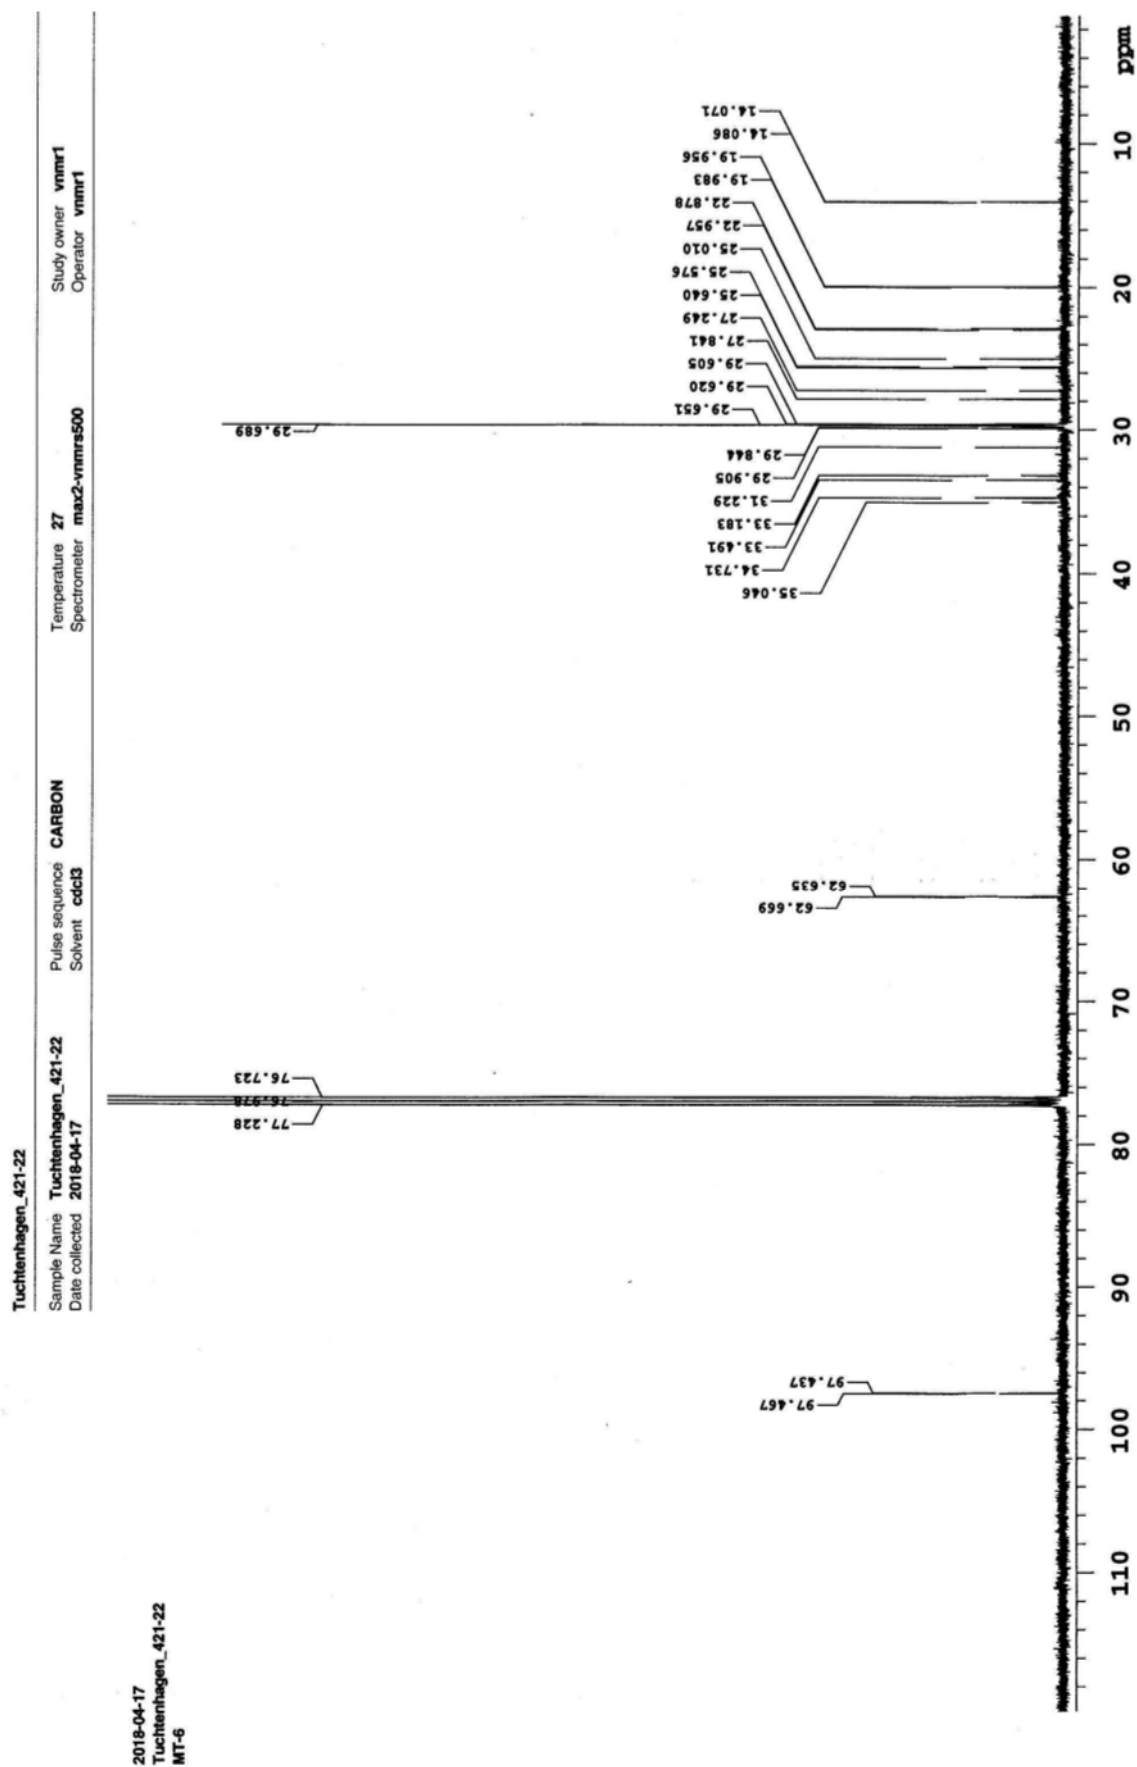

# Organic & Biomolecular Chemistry

Compound **9b** – ESI-MS (positive mode)

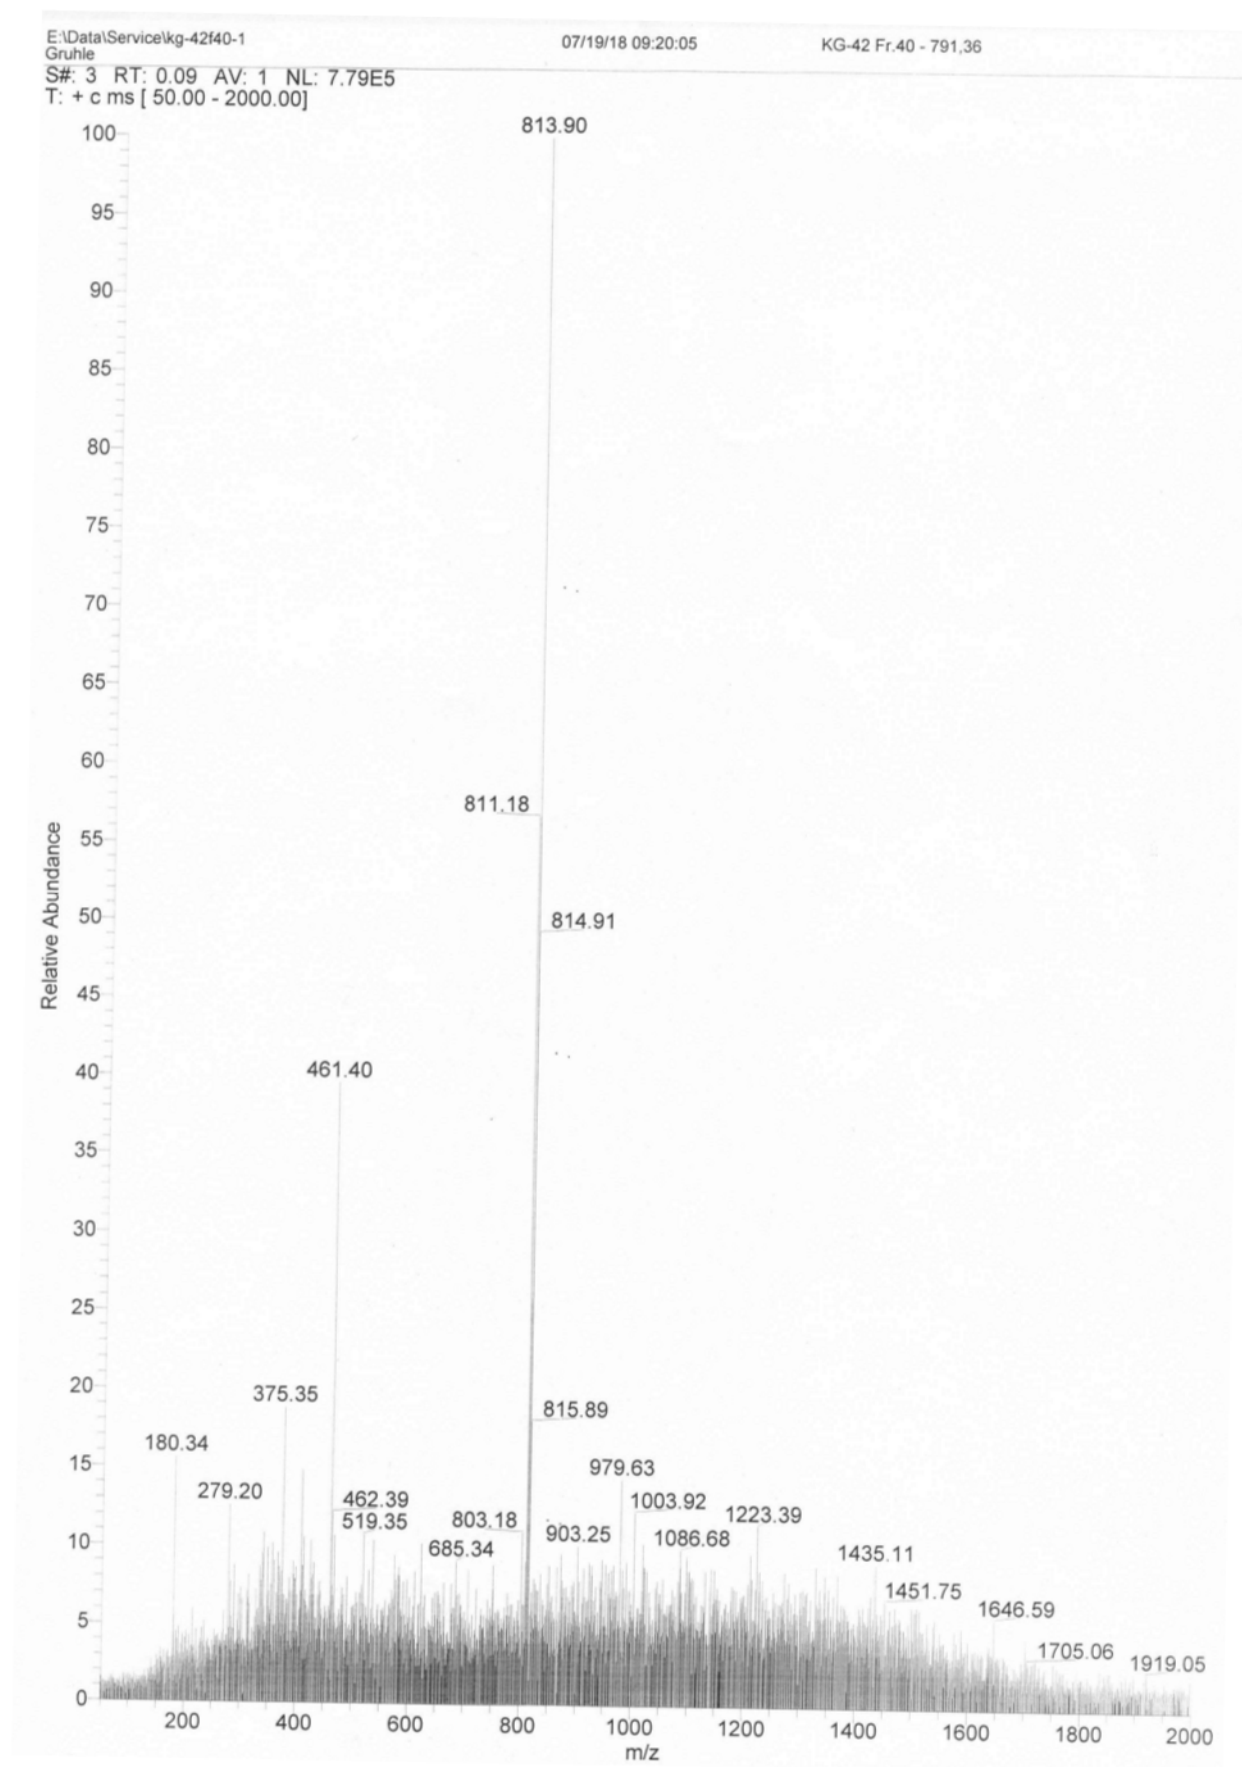

# Organic & Biomolecular Chemistry

Compound 9b -  $^1\text{H}$  NMR

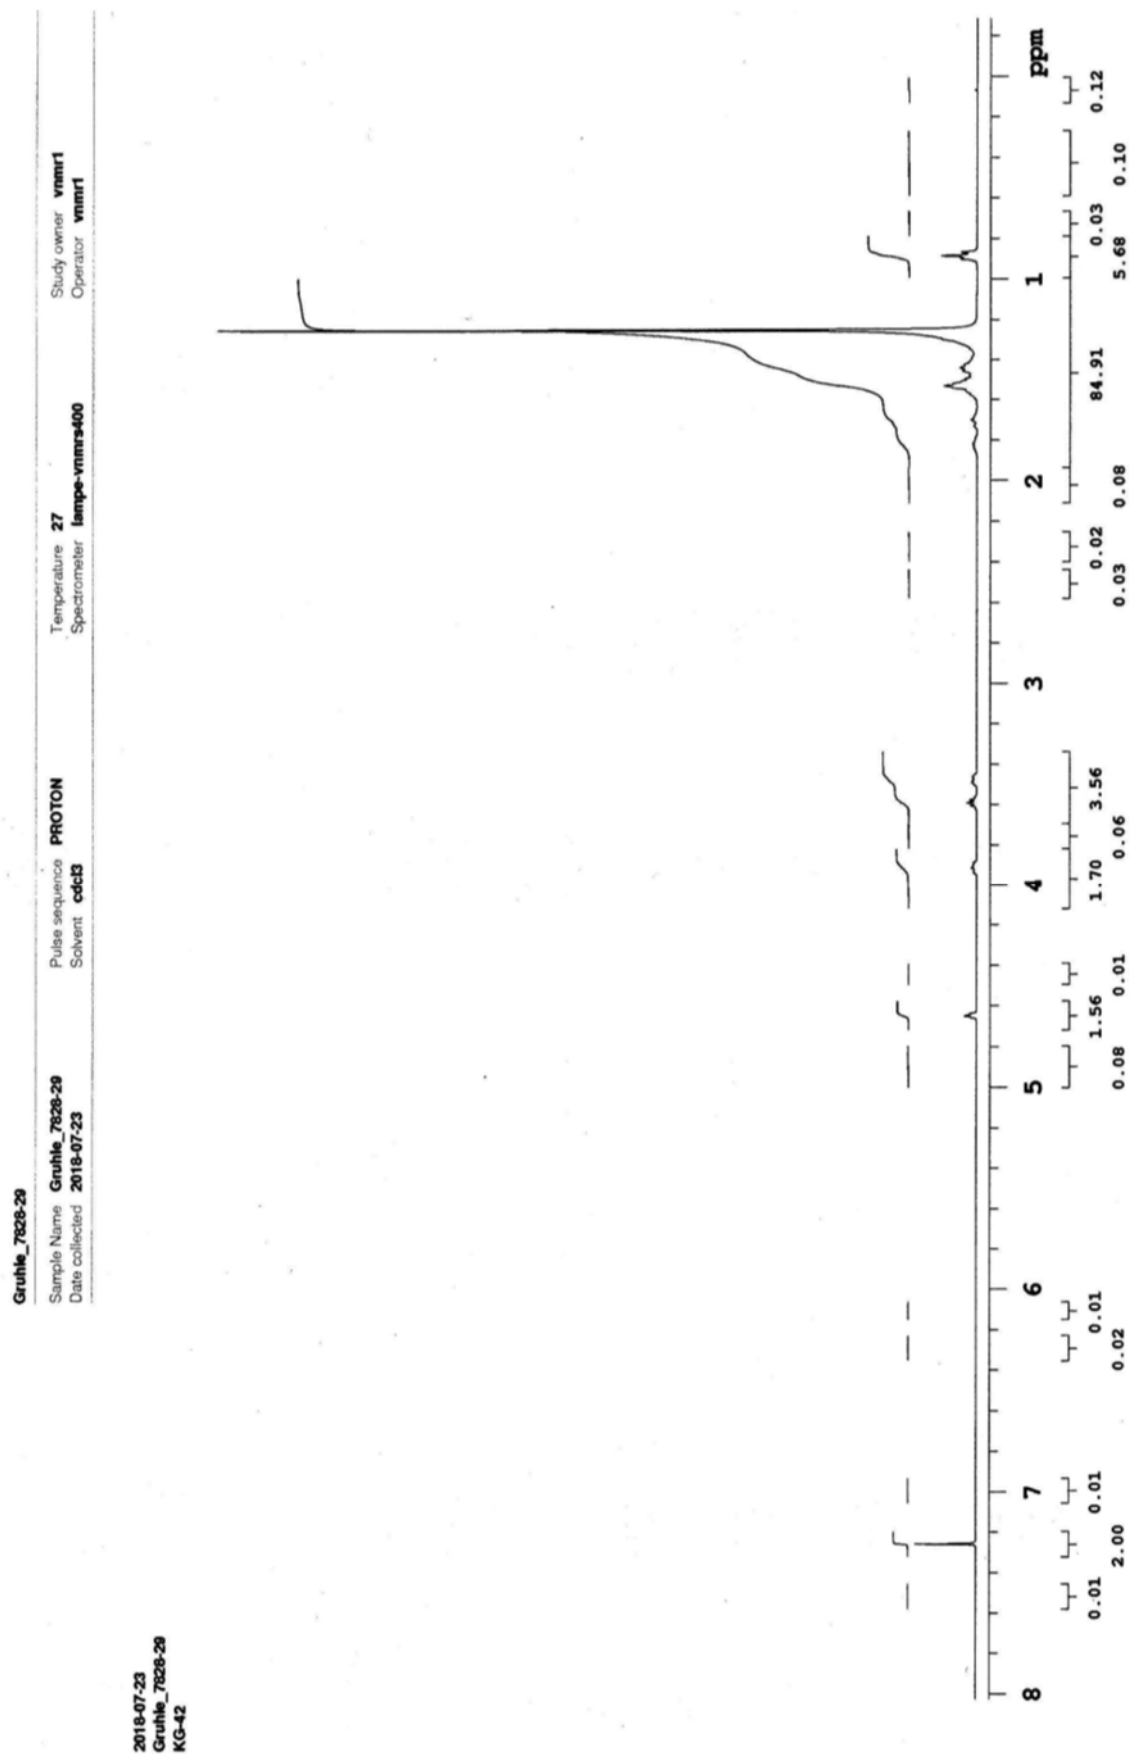

# Organic & Biomolecular Chemistry

## Compound 9b - $^{13}\text{C}$ NMR

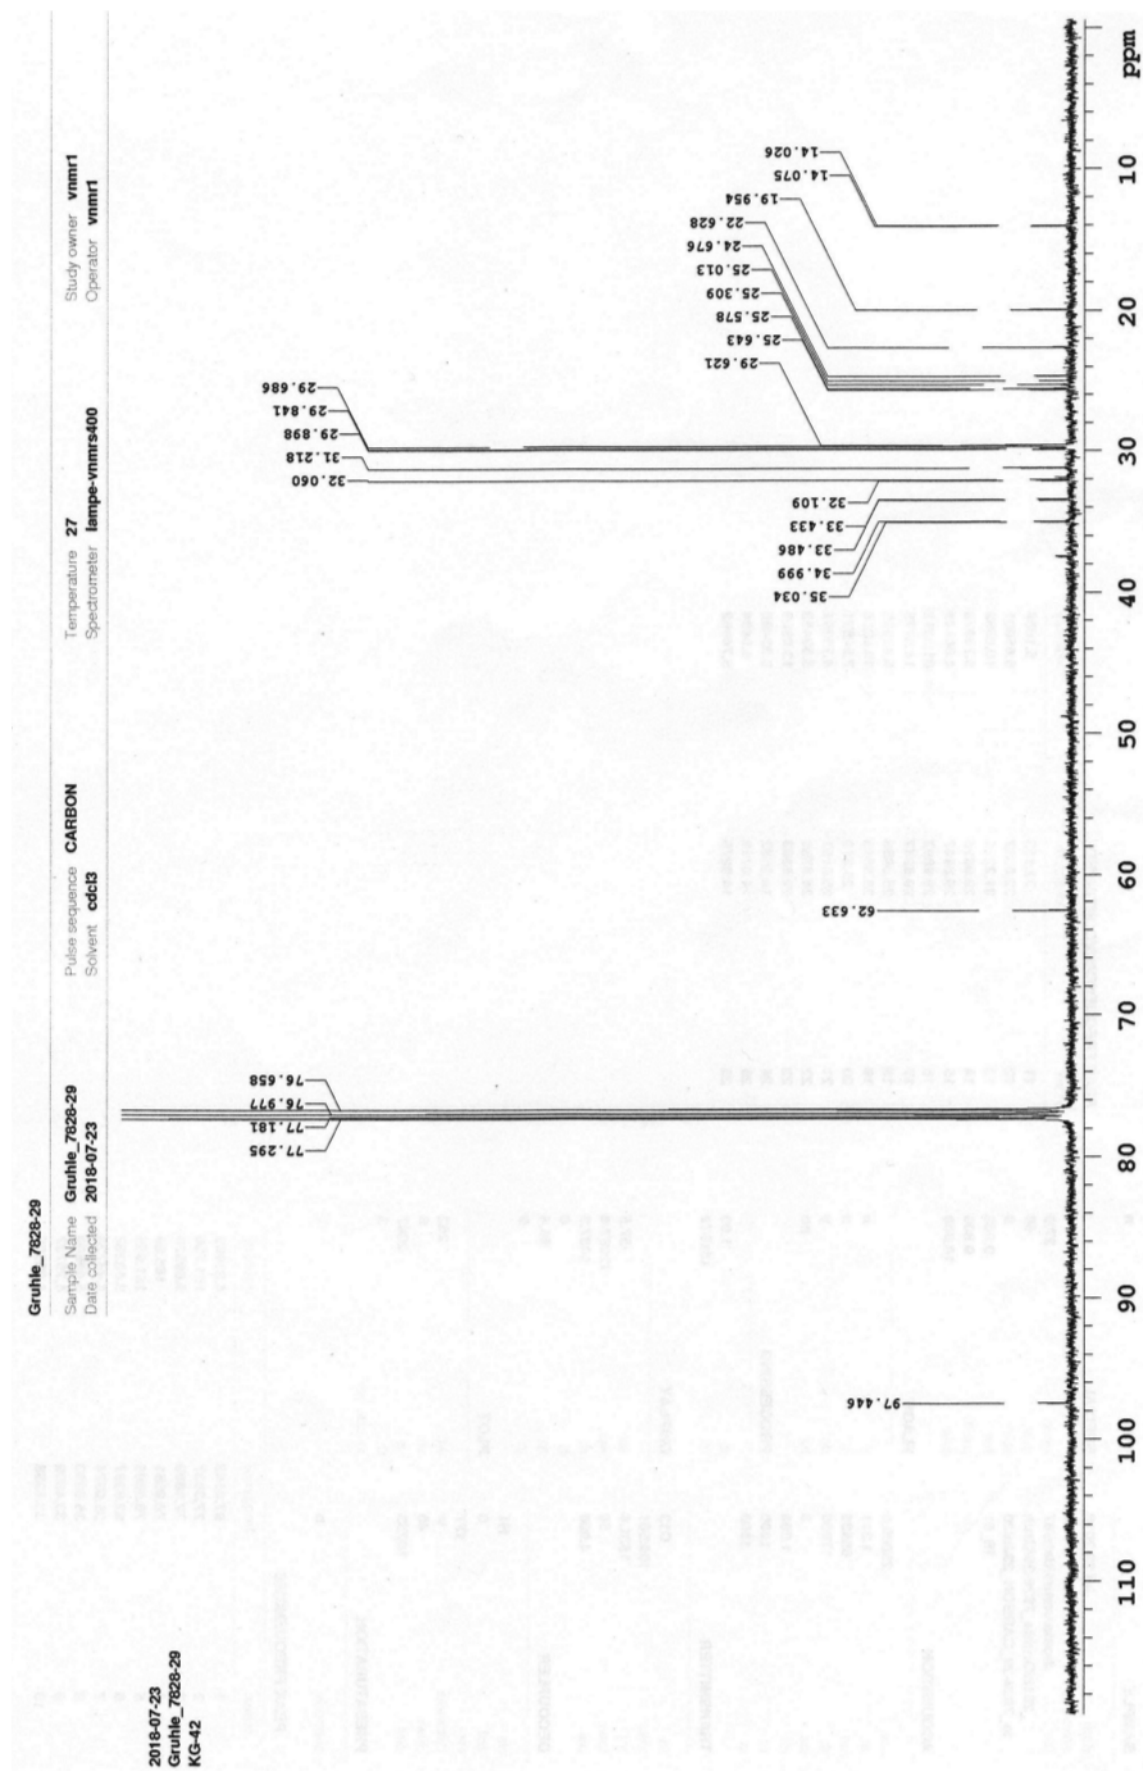

# Organic & Biomolecular Chemistry

## Compound 9c – ESI-MS (positive mode)

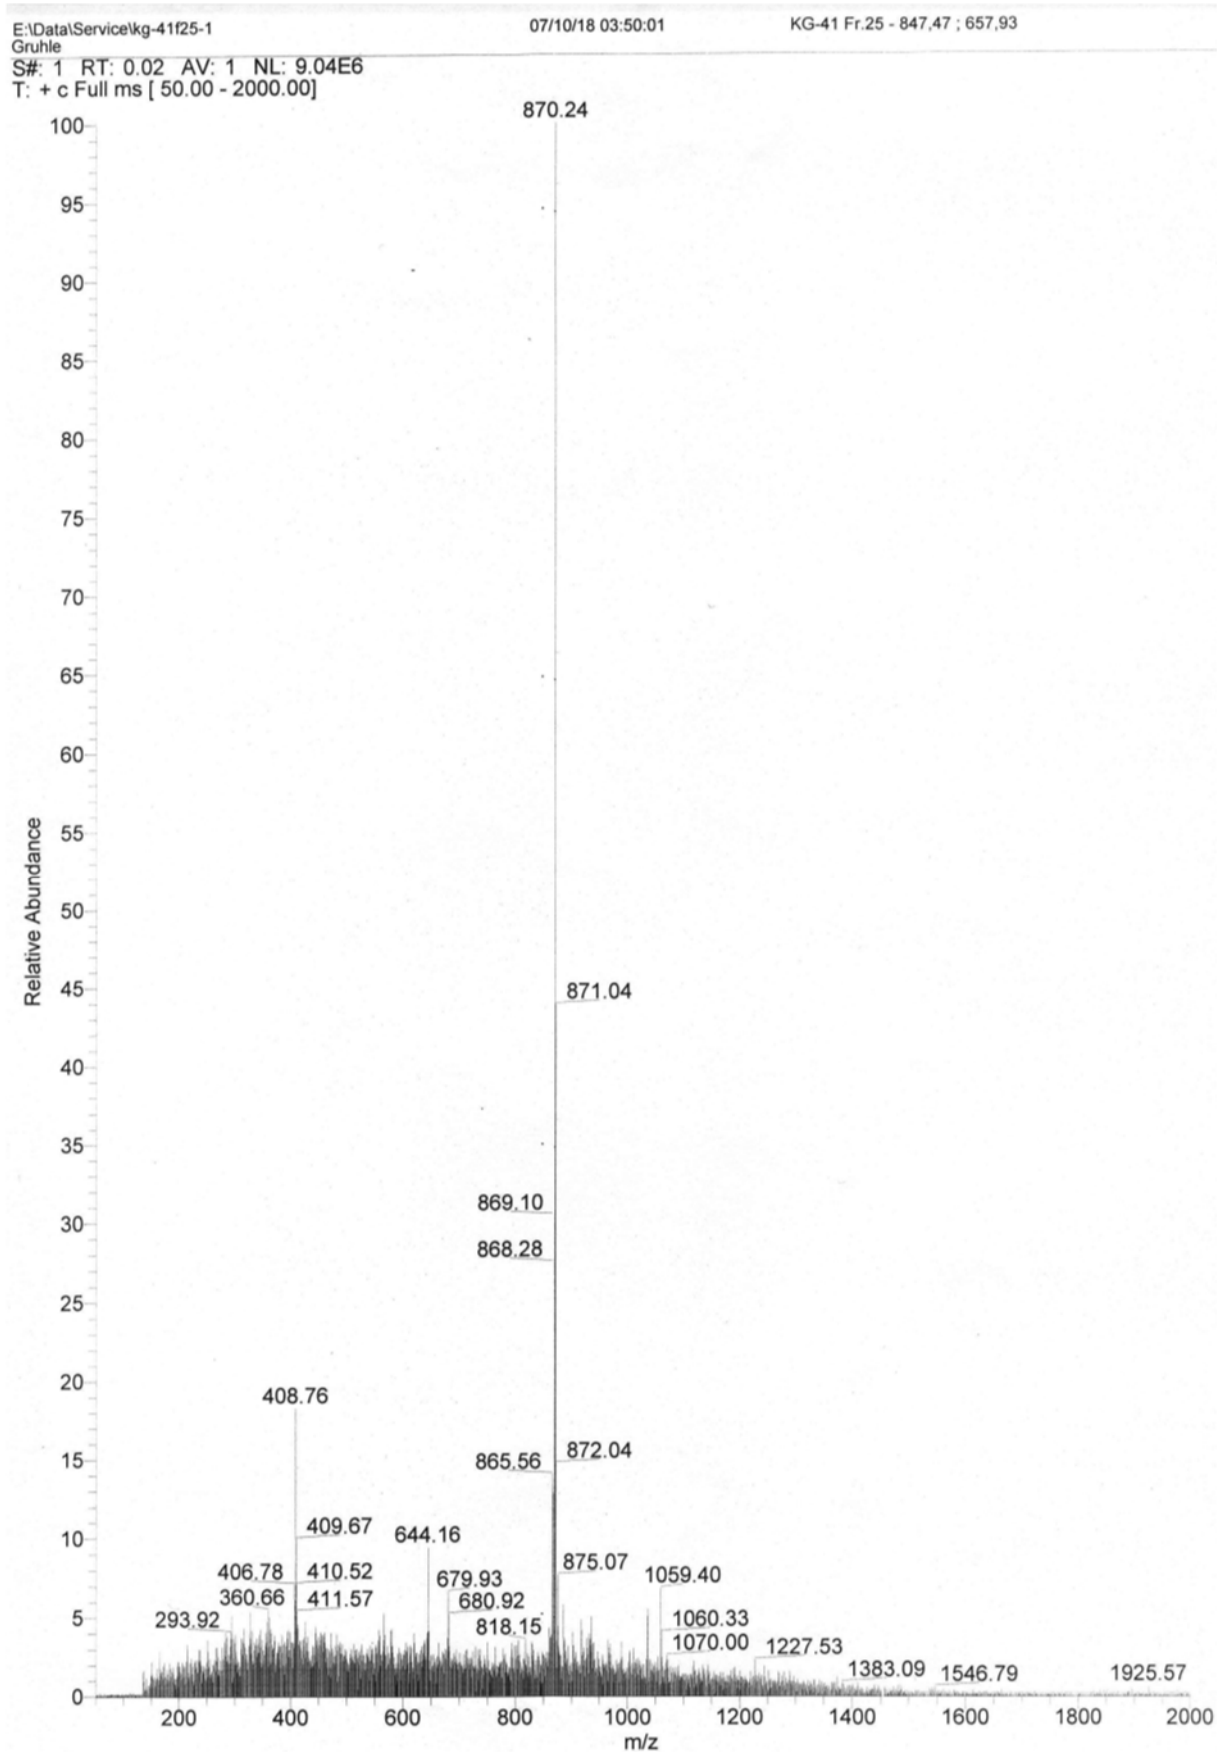



# Organic & Biomolecular Chemistry

Compound 9c -  $^1\text{H}$  NMR

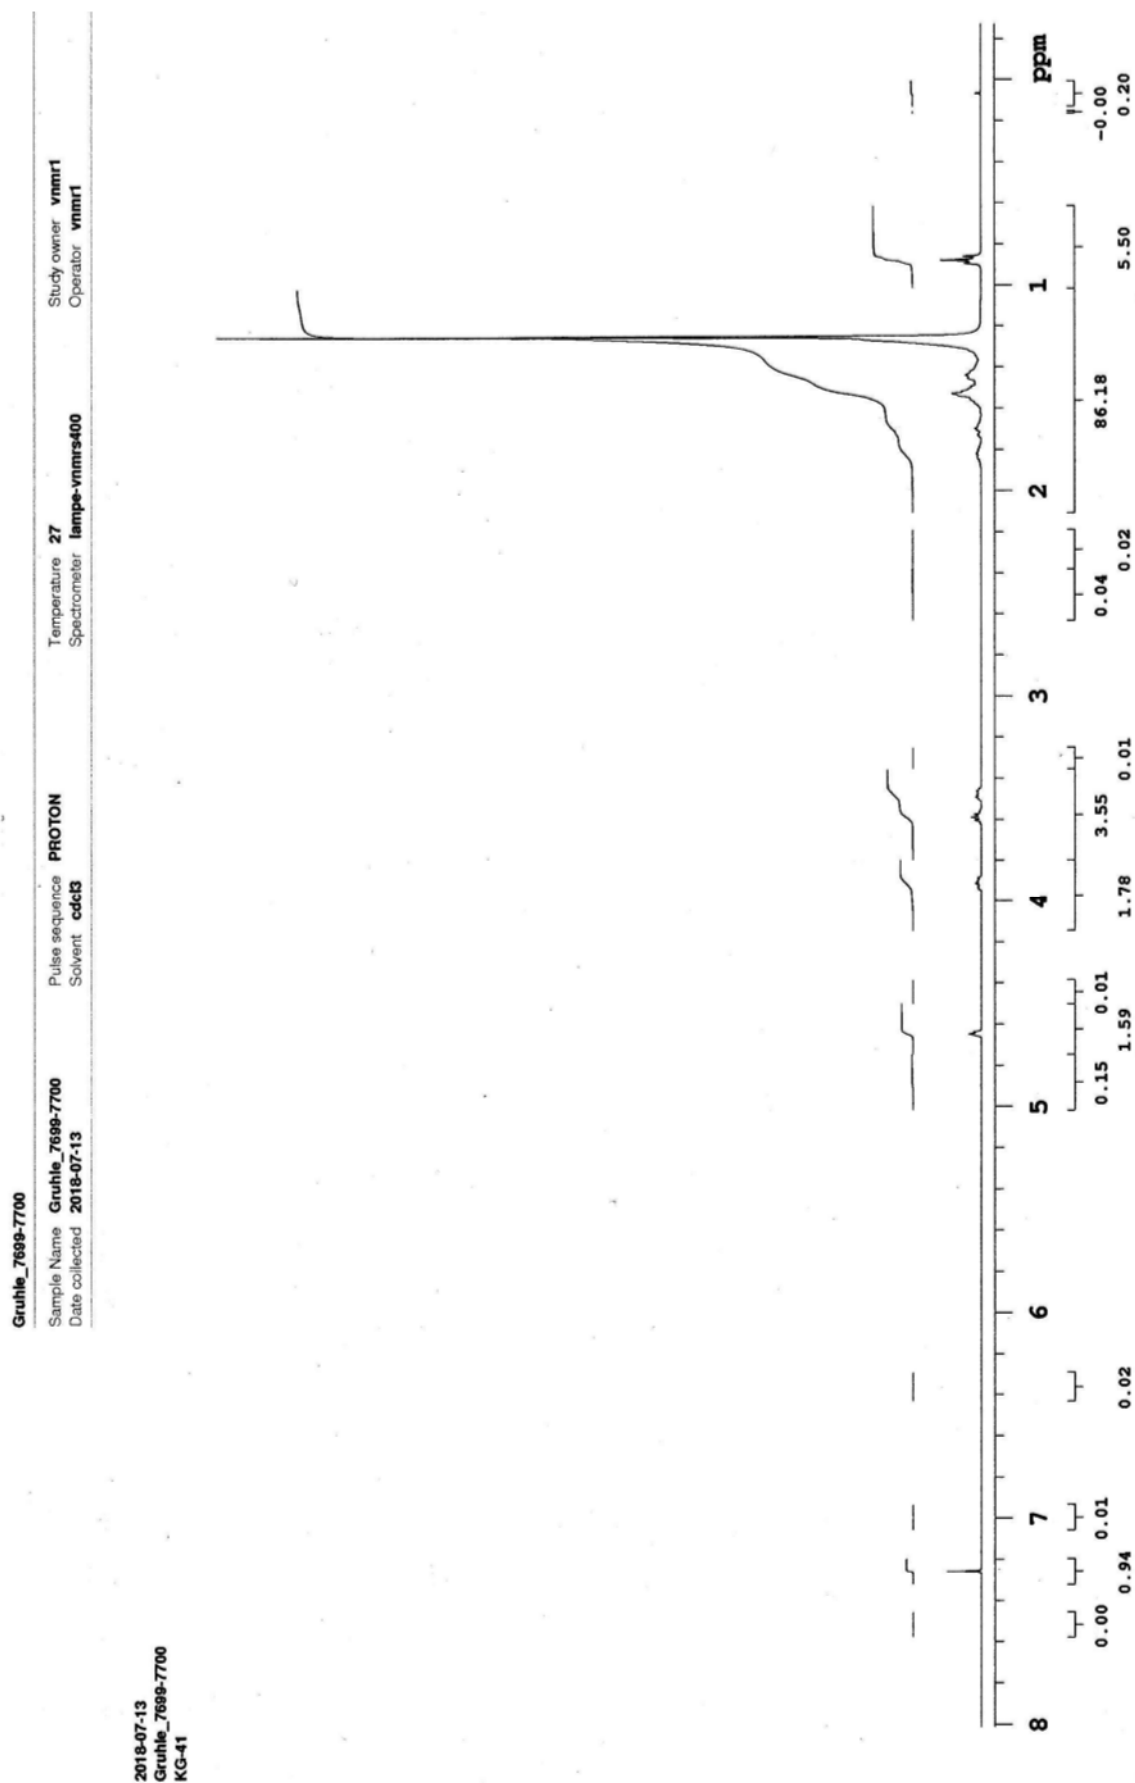

# Organic & Biomolecular Chemistry

Compound 9c –  $^{13}\text{C}$  NMR

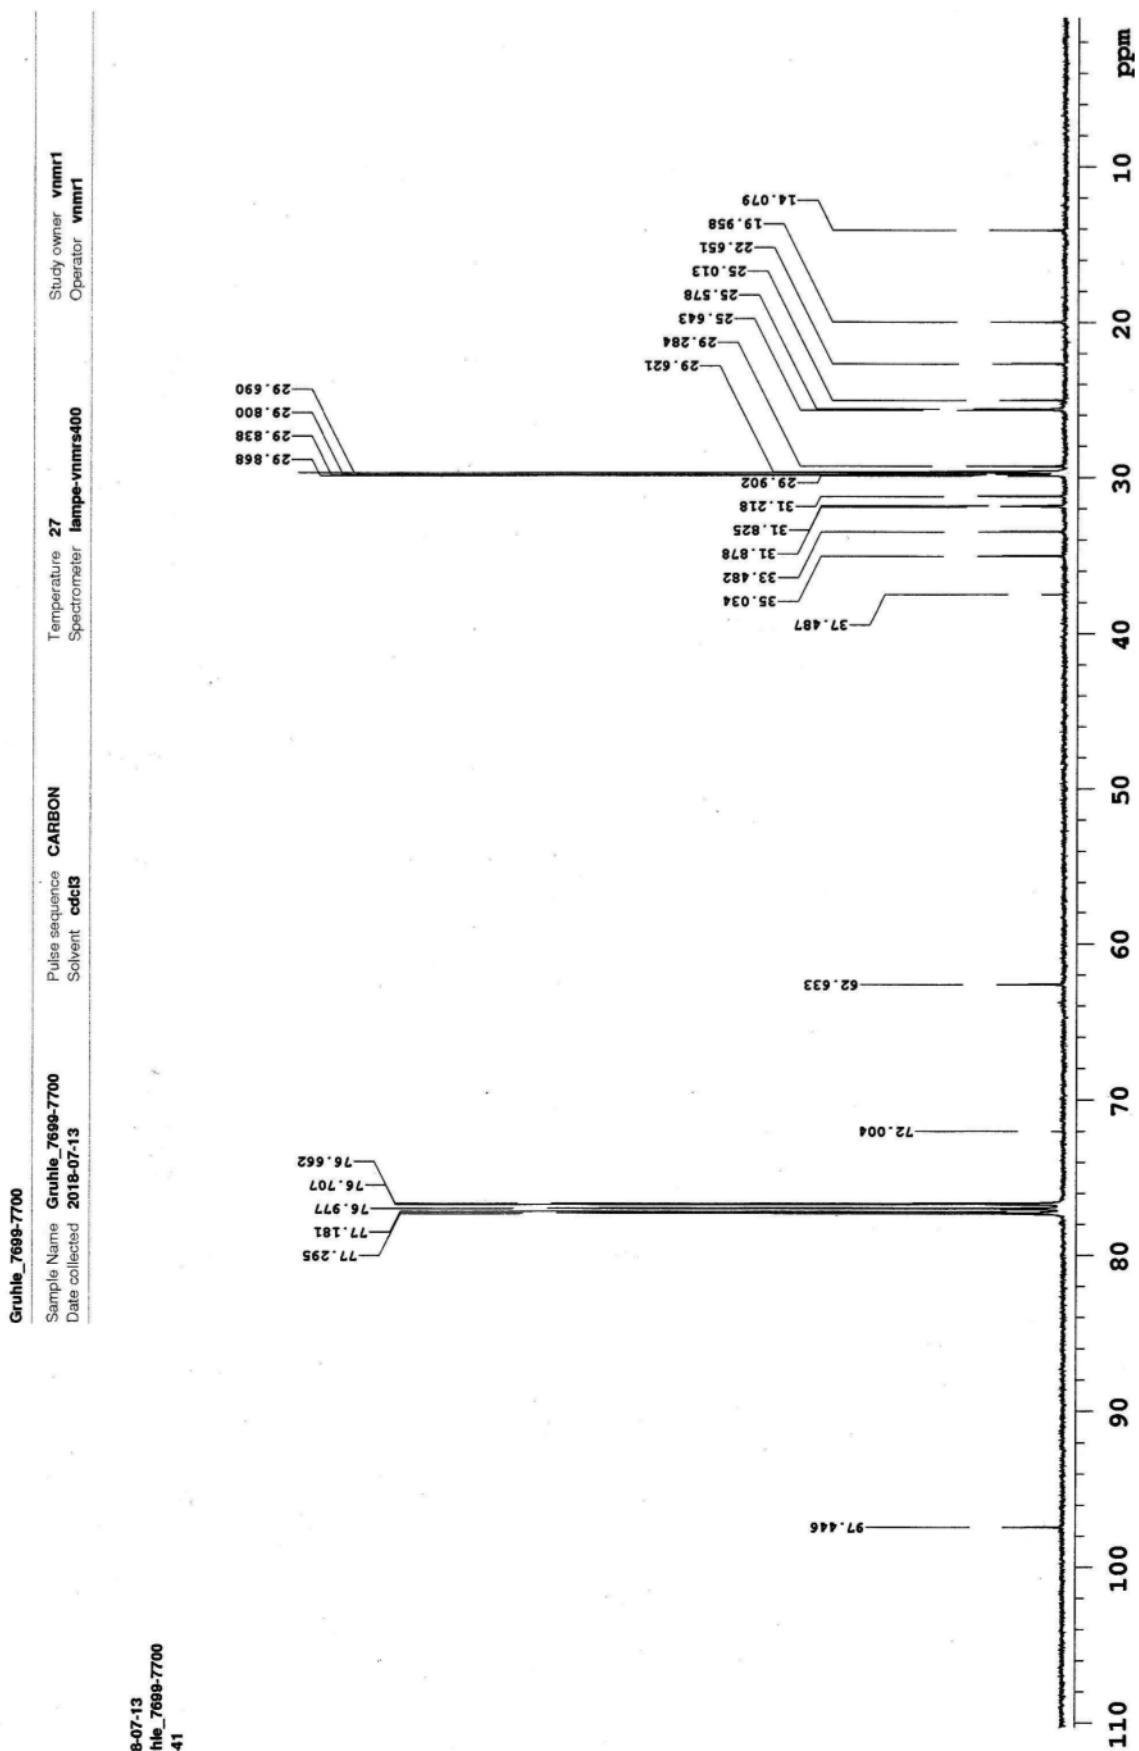

2018-07-13  
Grubbe\_7699-7700  
KG-41

# Organic & Biomolecular Chemistry

Compound **9d** – ESI-MS (positive mode)

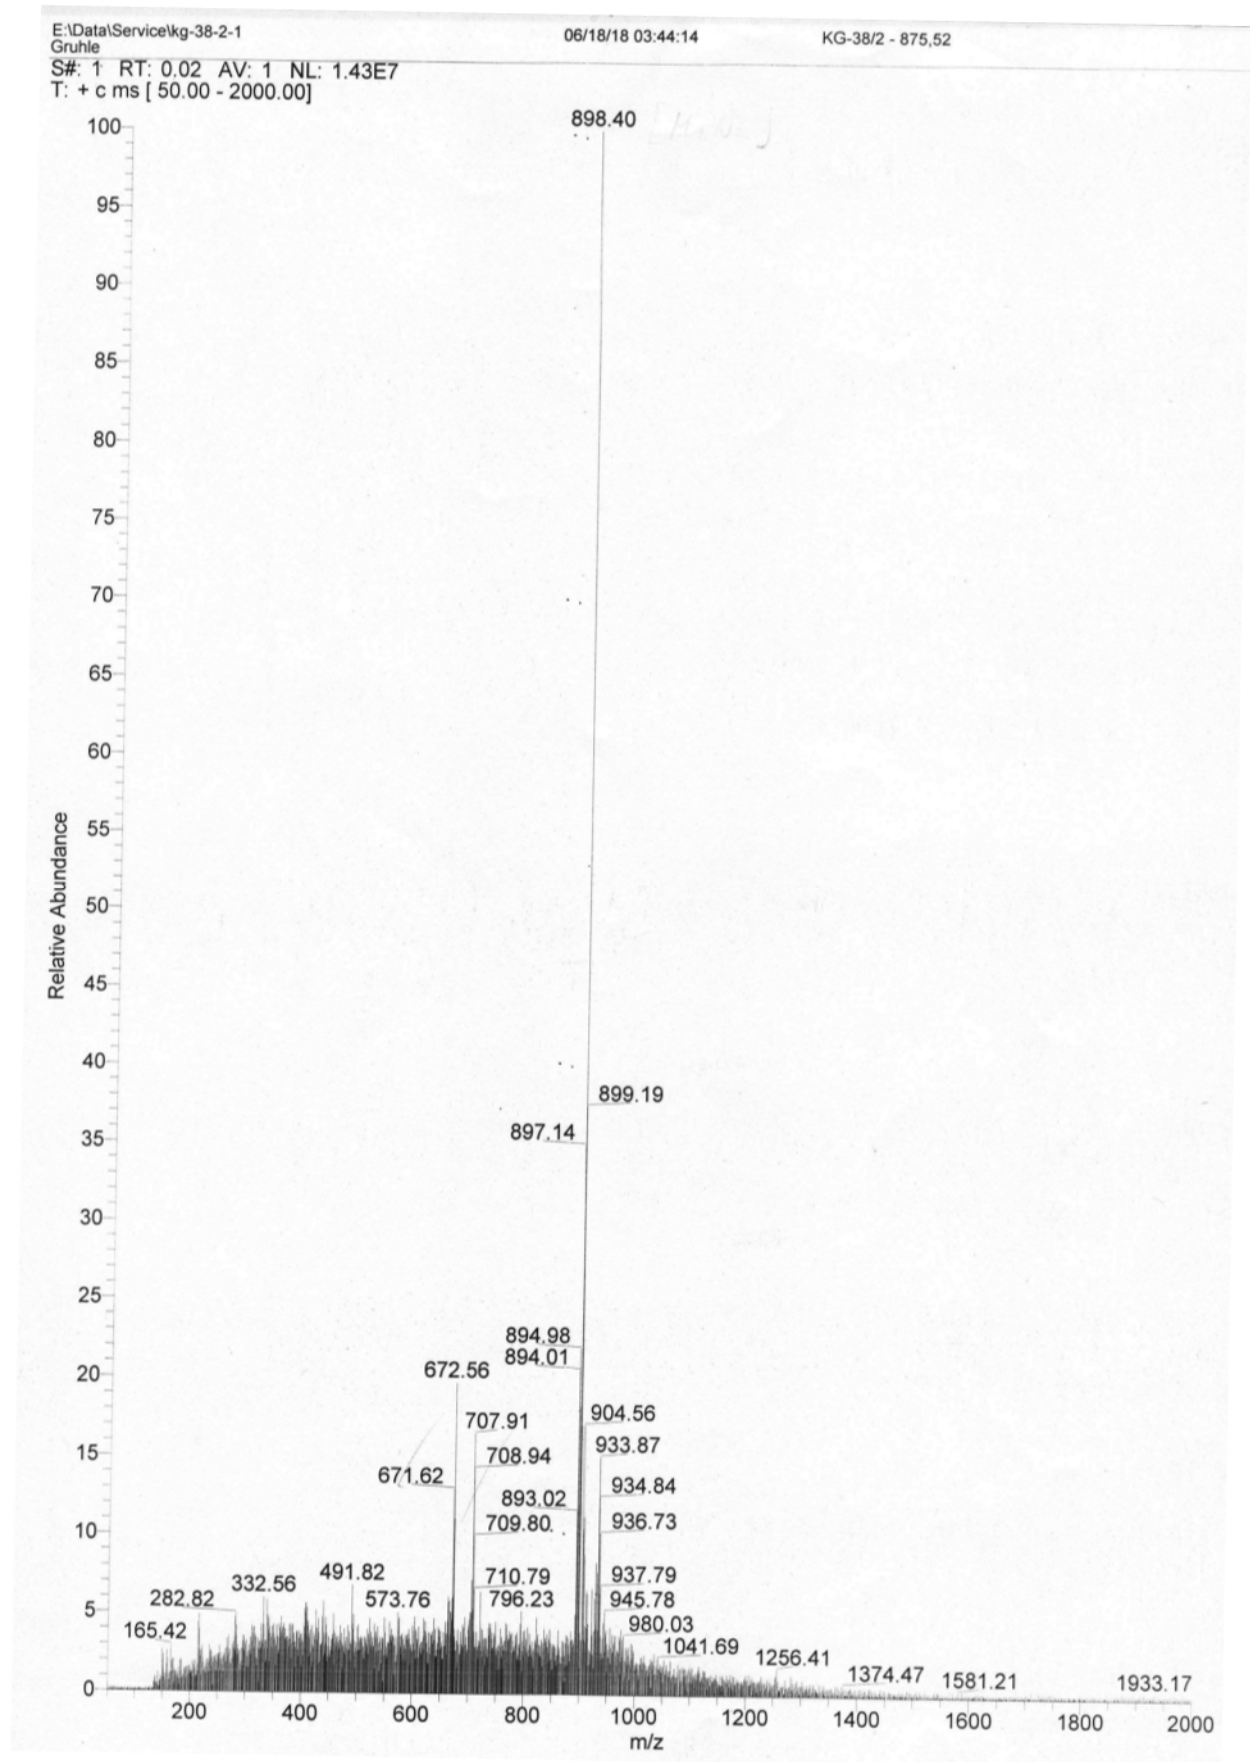

# Organic & Biomolecular Chemistry

Compound 9d -  $^1\text{H}$  NMR

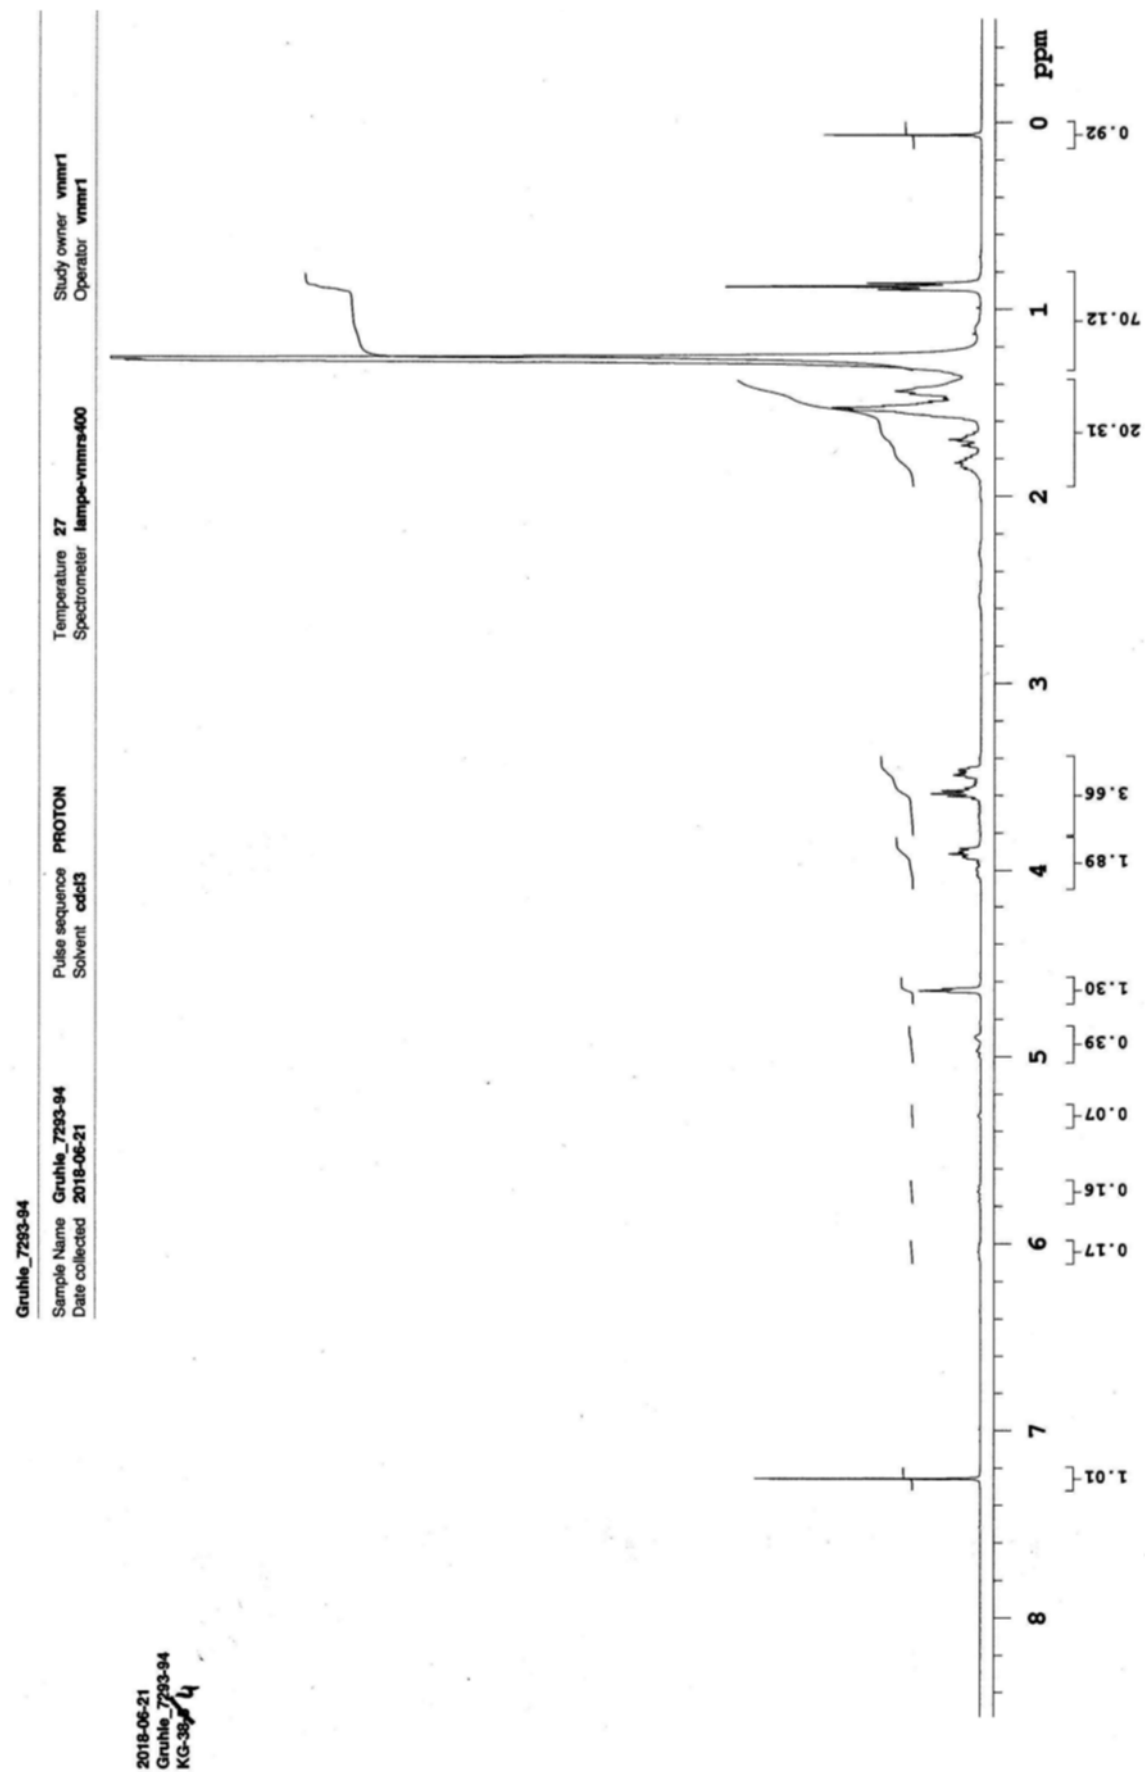

# Organic & Biomolecular Chemistry

## Compound 9d - $^{13}\text{C}$ NMR

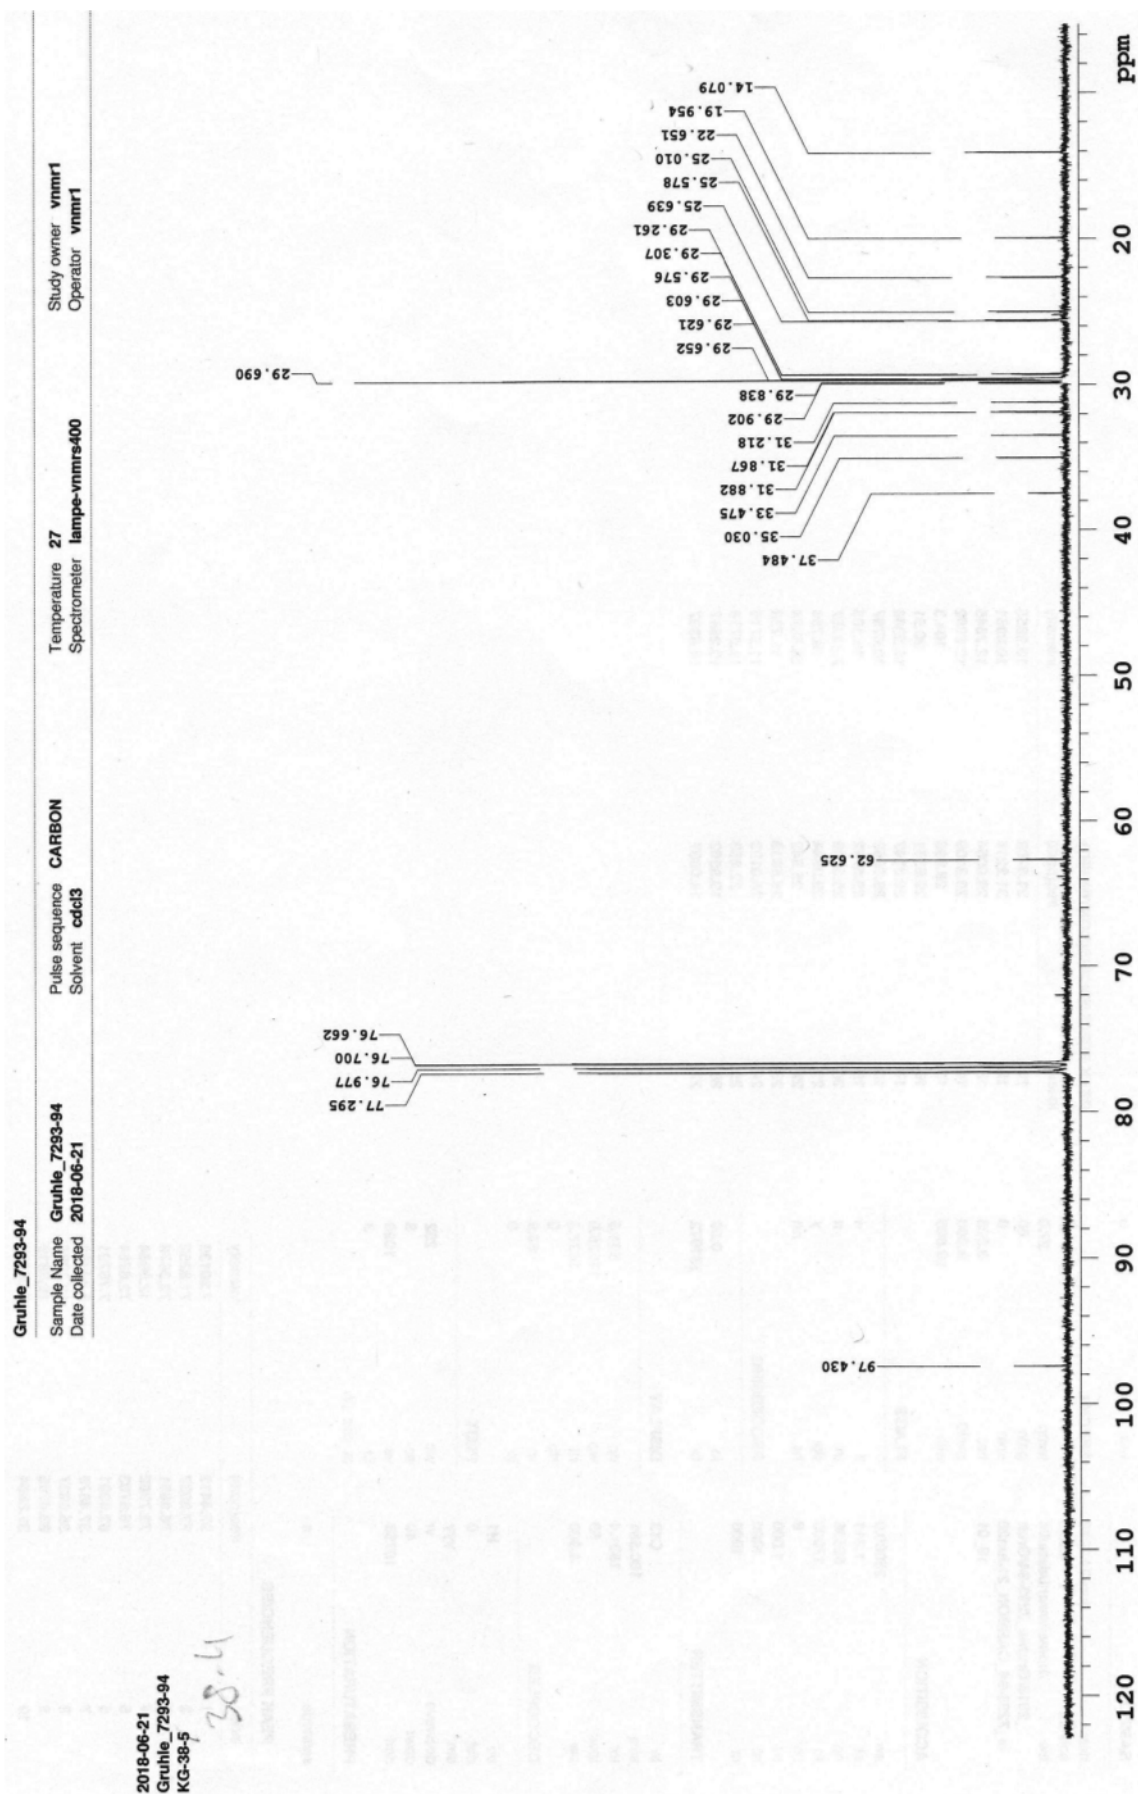

# Organic & Biomolecular Chemistry

Compound **9e** – ESI-MS (positive mode)

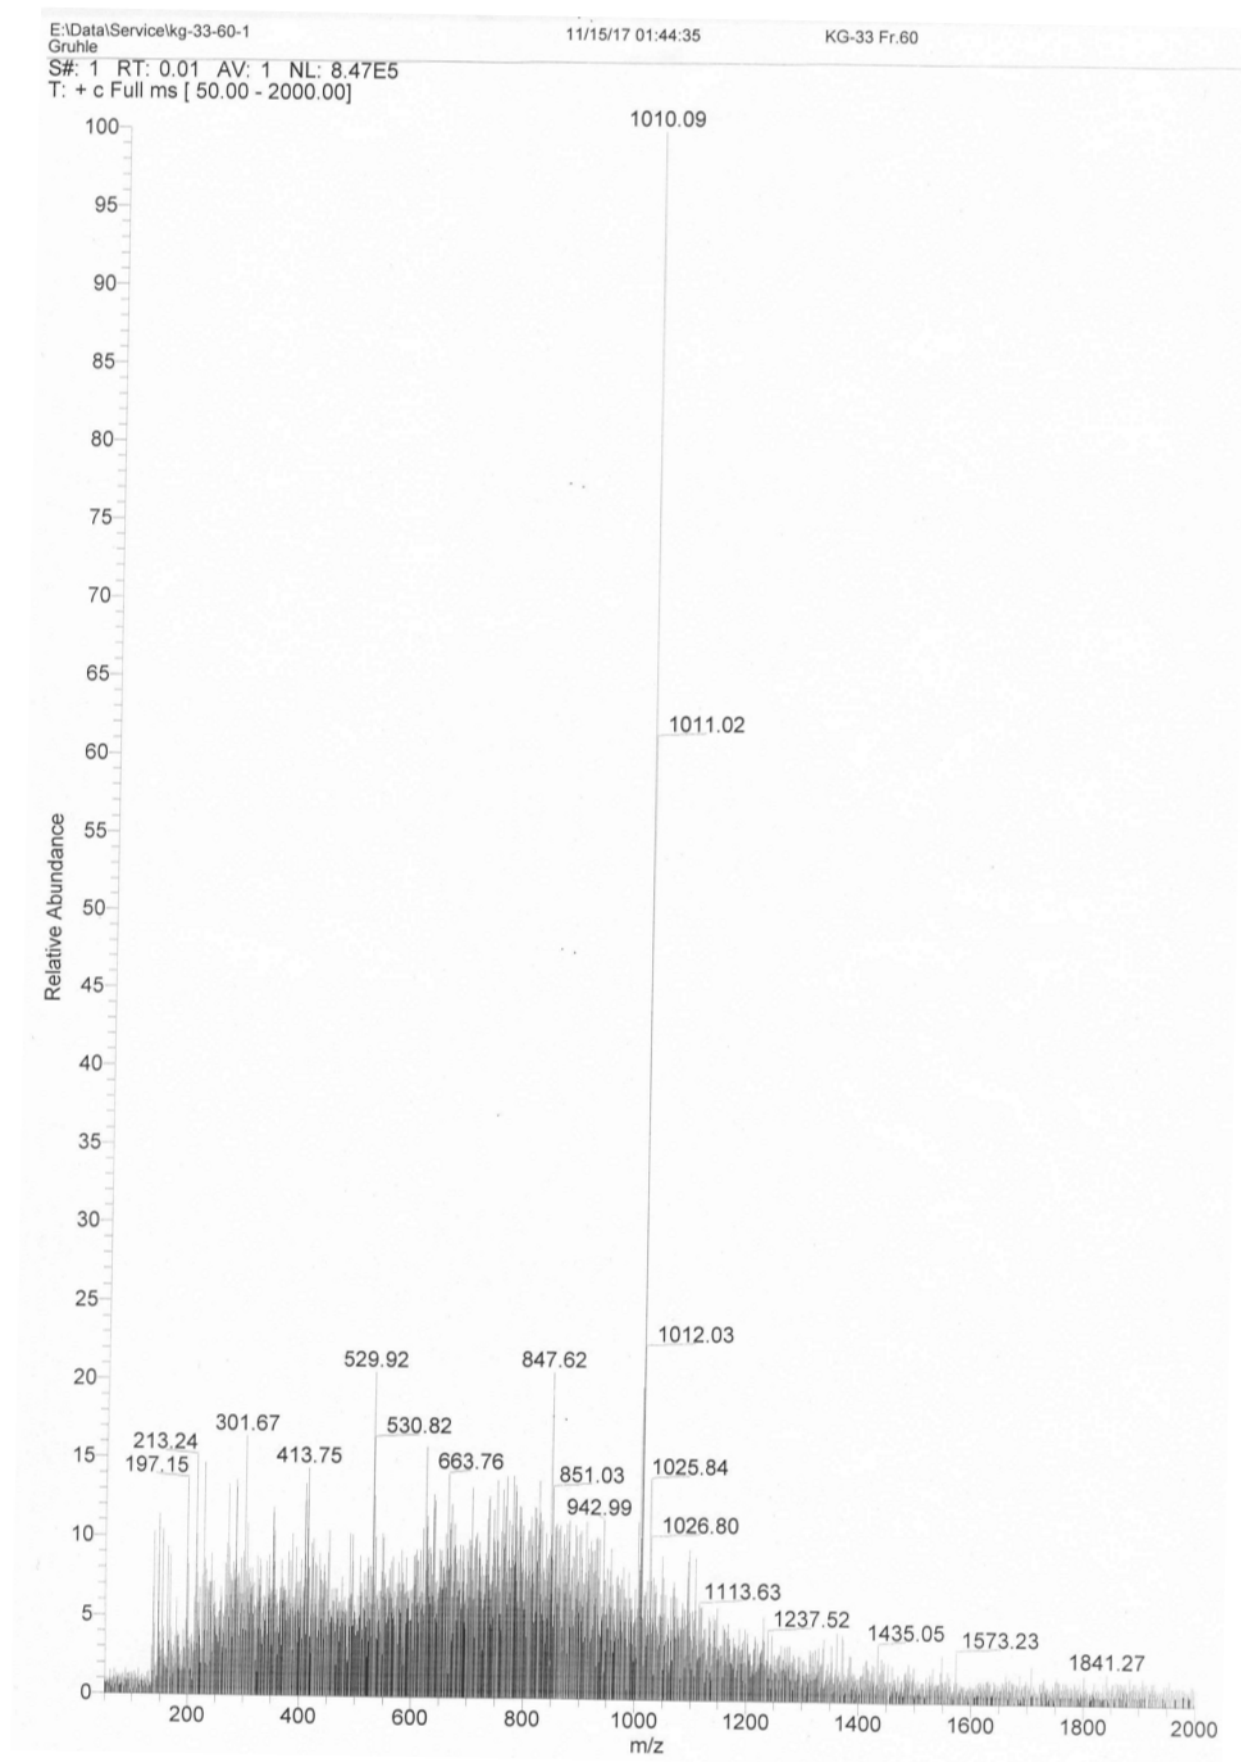

# Organic & Biomolecular Chemistry

Compound **9e** –  $^1\text{H}$  NMR

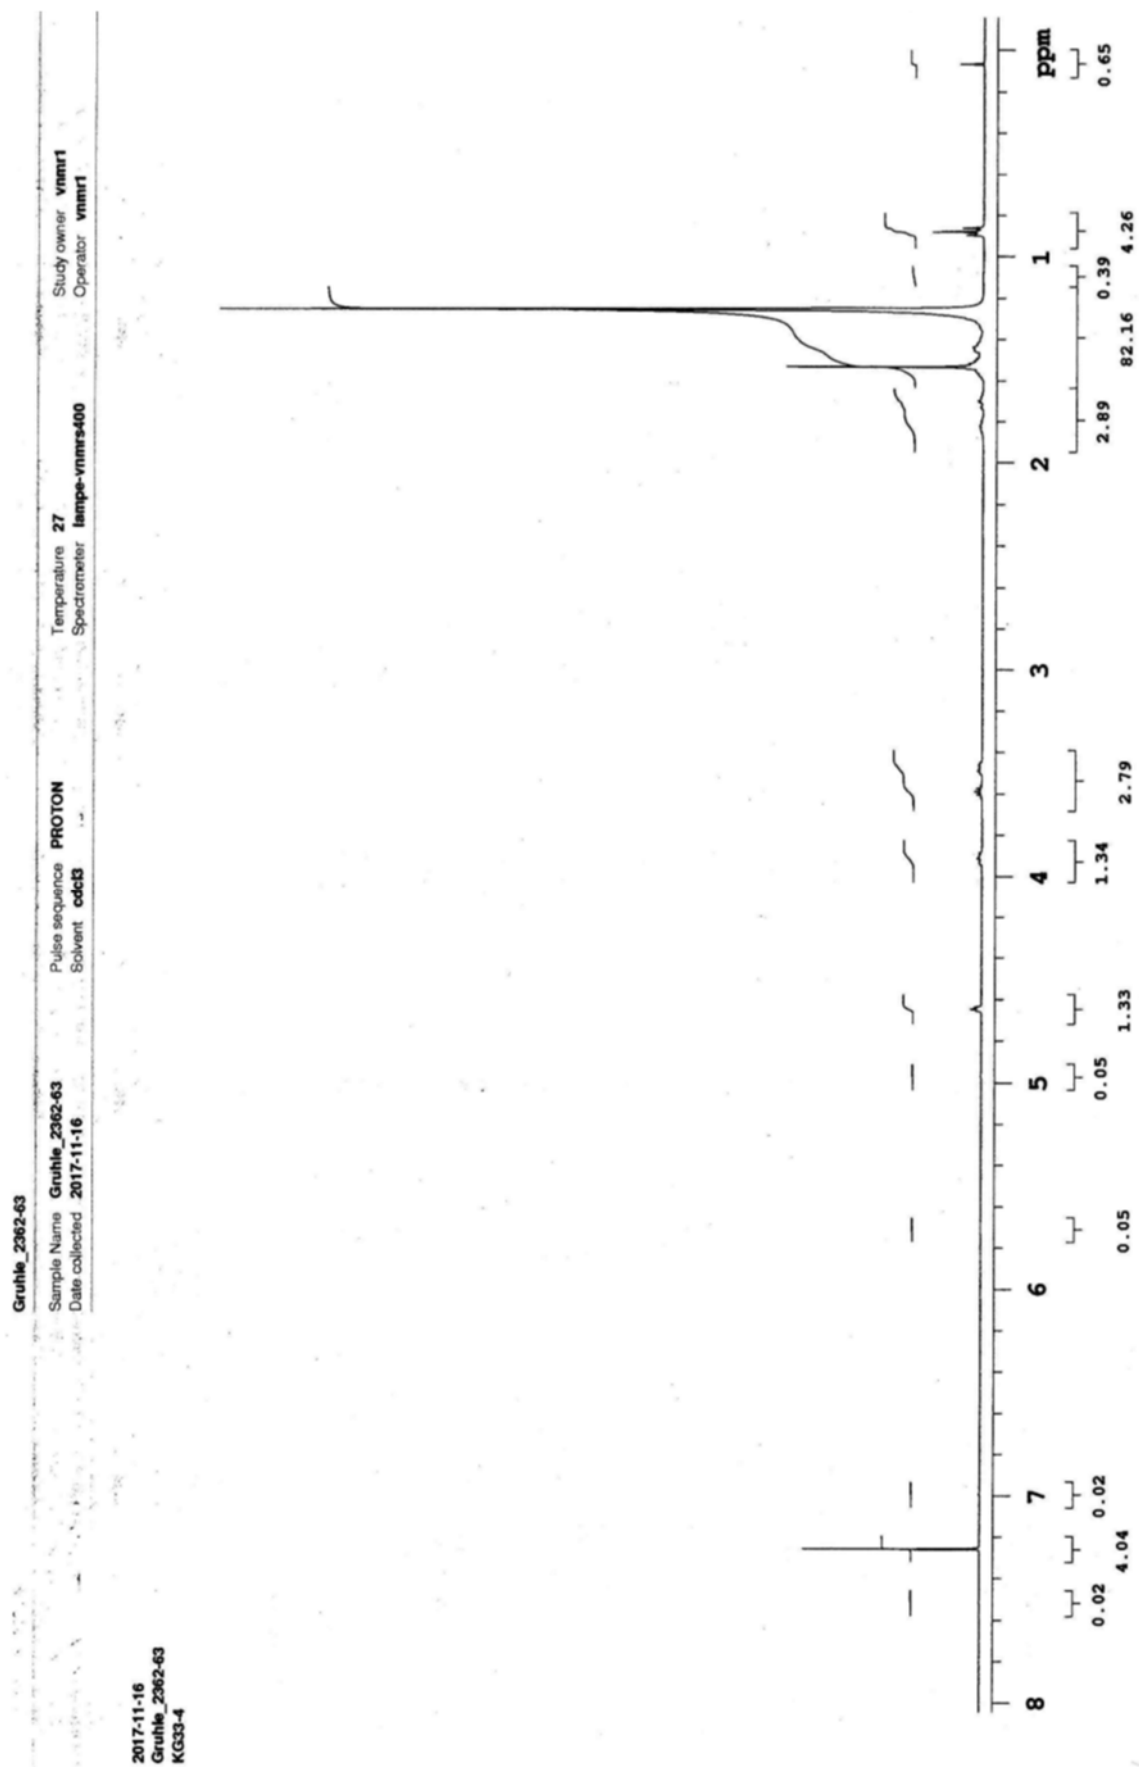

# Organic & Biomolecular Chemistry

Compound **9e** –  $^{13}\text{C}$  NMR

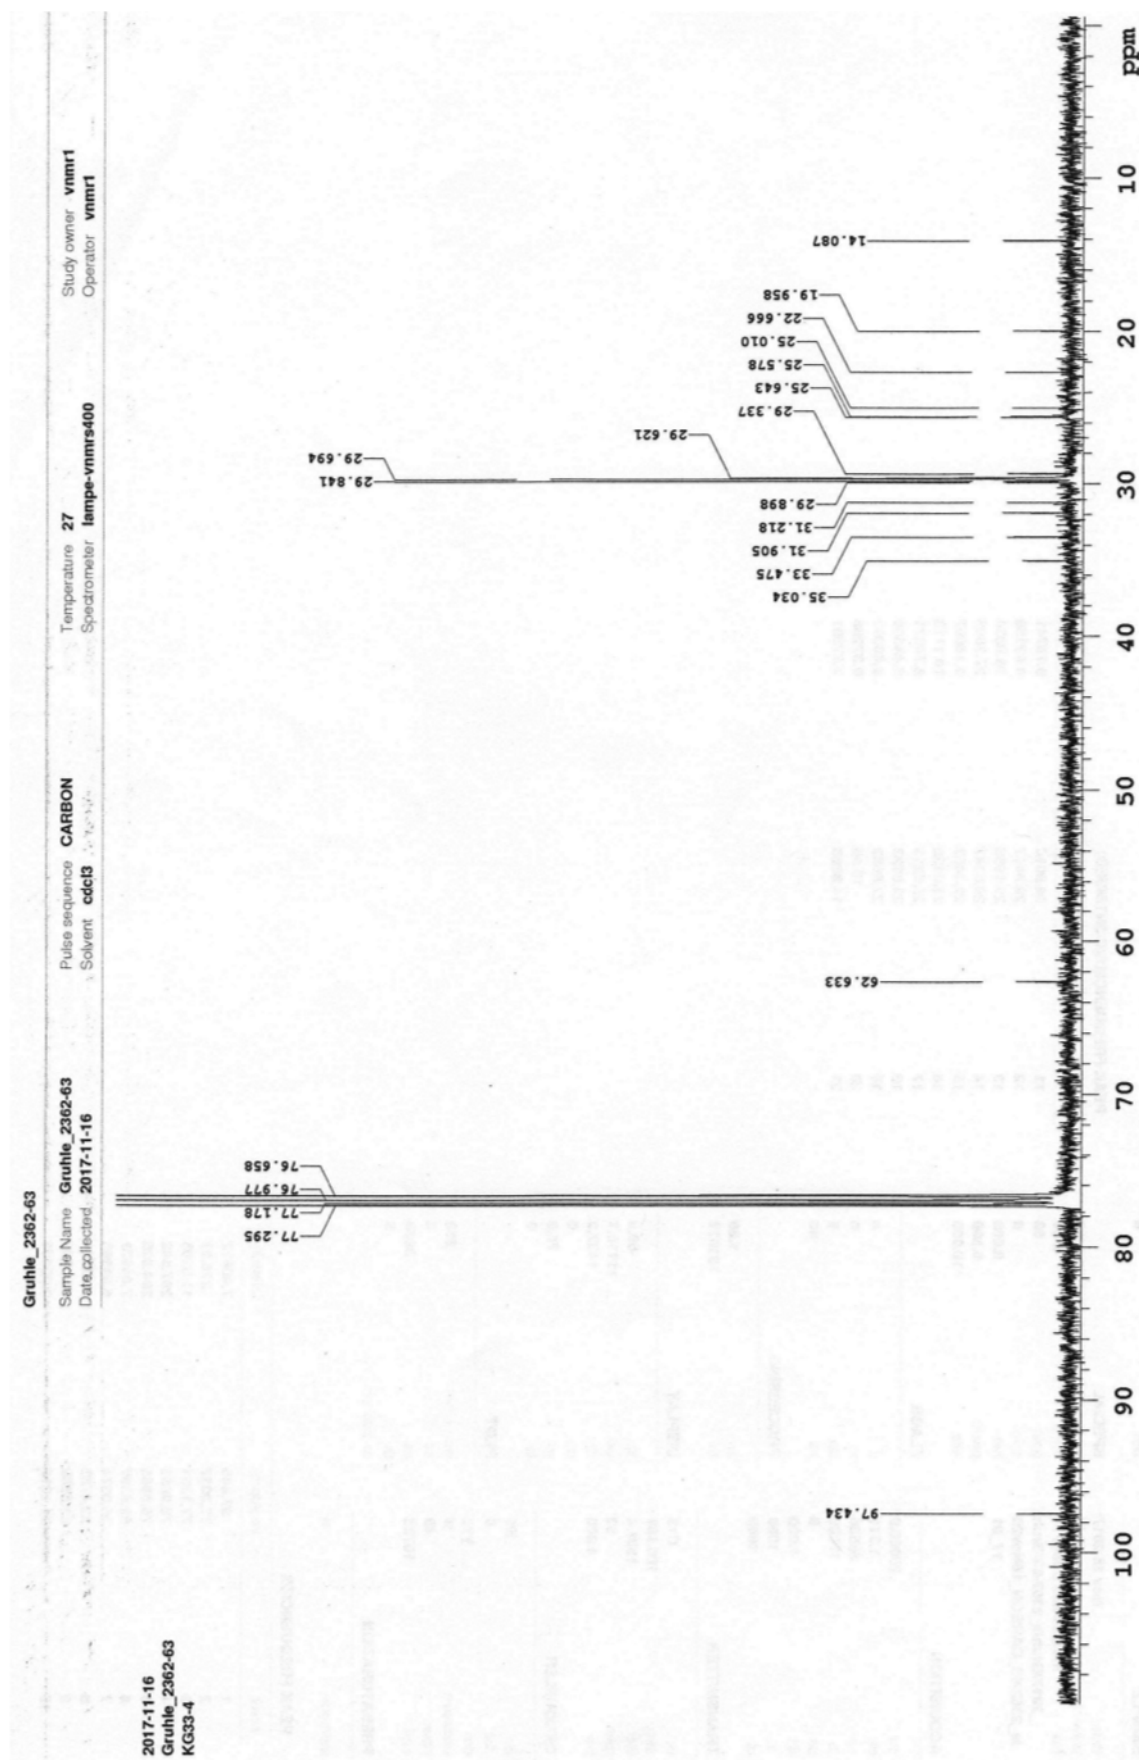



# Organic & Biomolecular Chemistry

Compound **9f** – ESI-MS (positive mode)

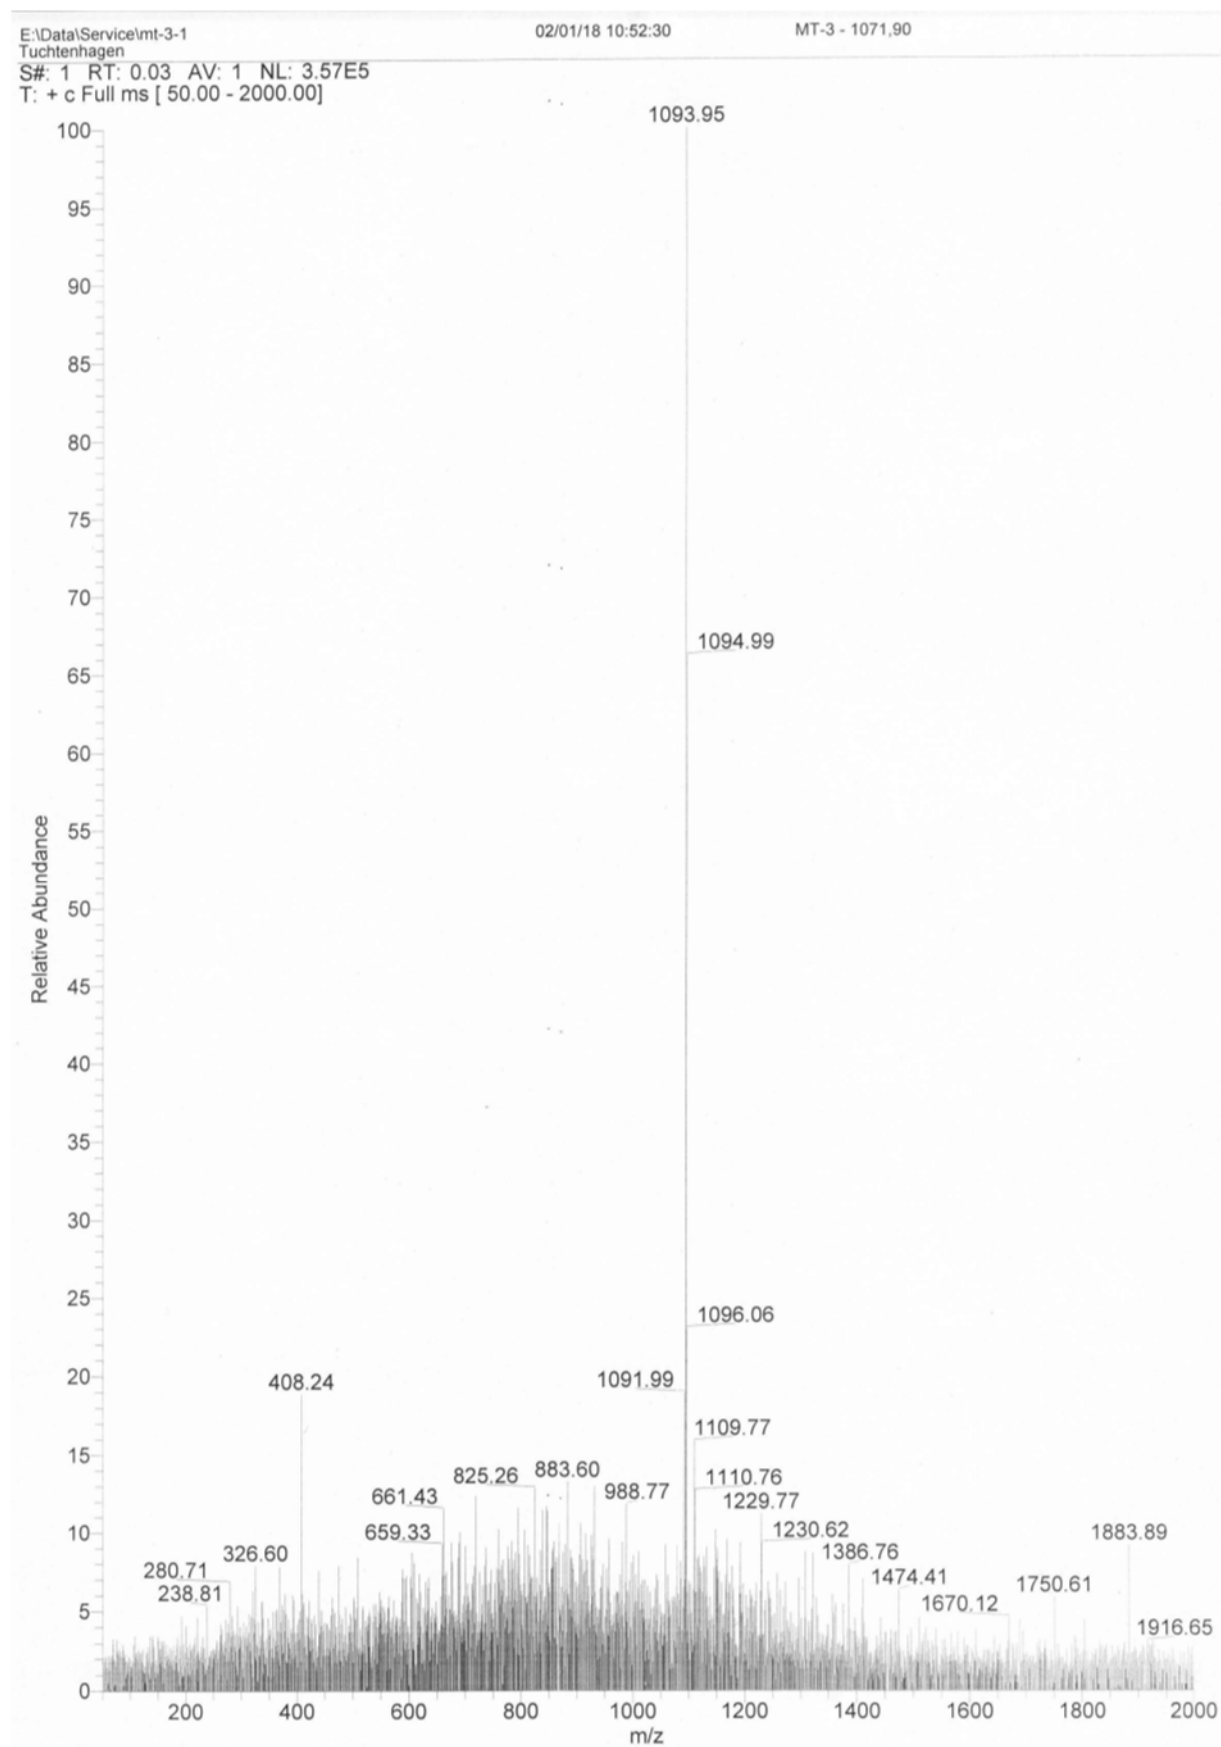

# Organic & Biomolecular Chemistry

## Compound 9f - $^1\text{H}$ NMR

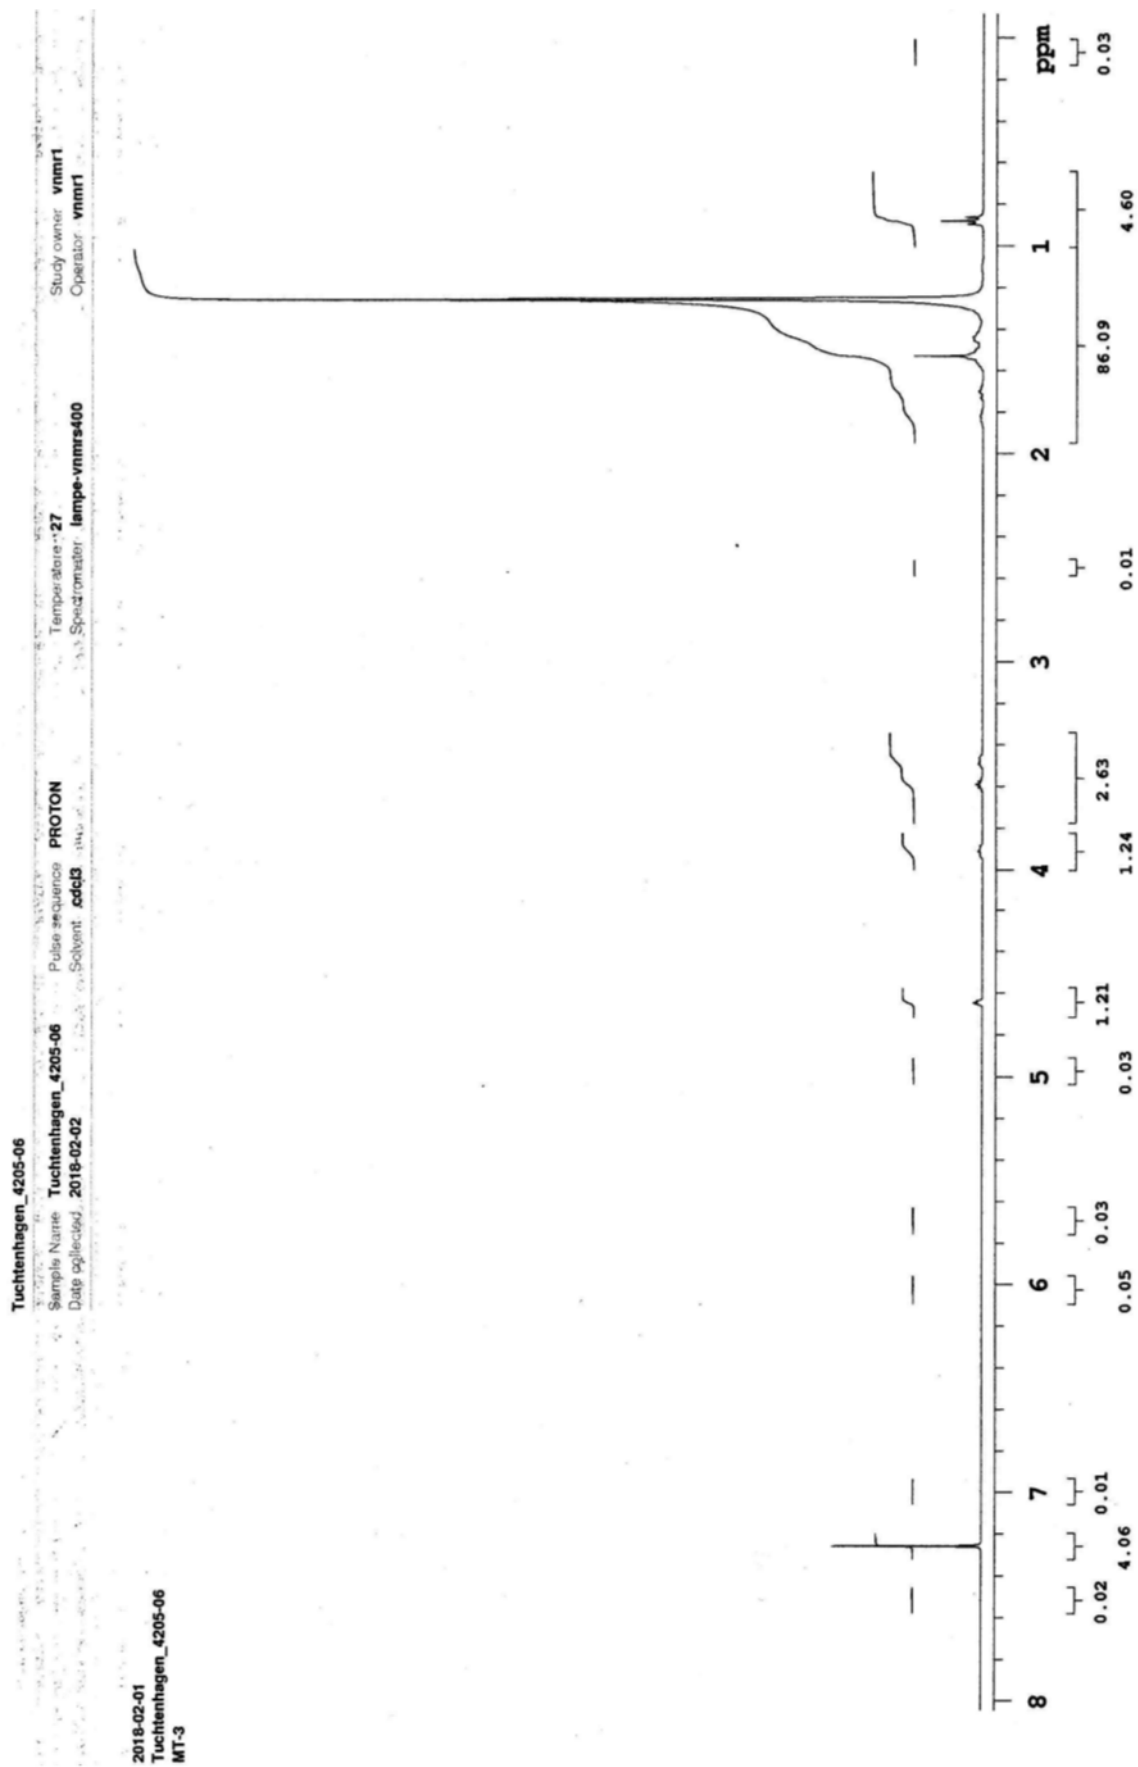

# Organic & Biomolecular Chemistry

## Compound 9f - $^{13}\text{C}$ NMR

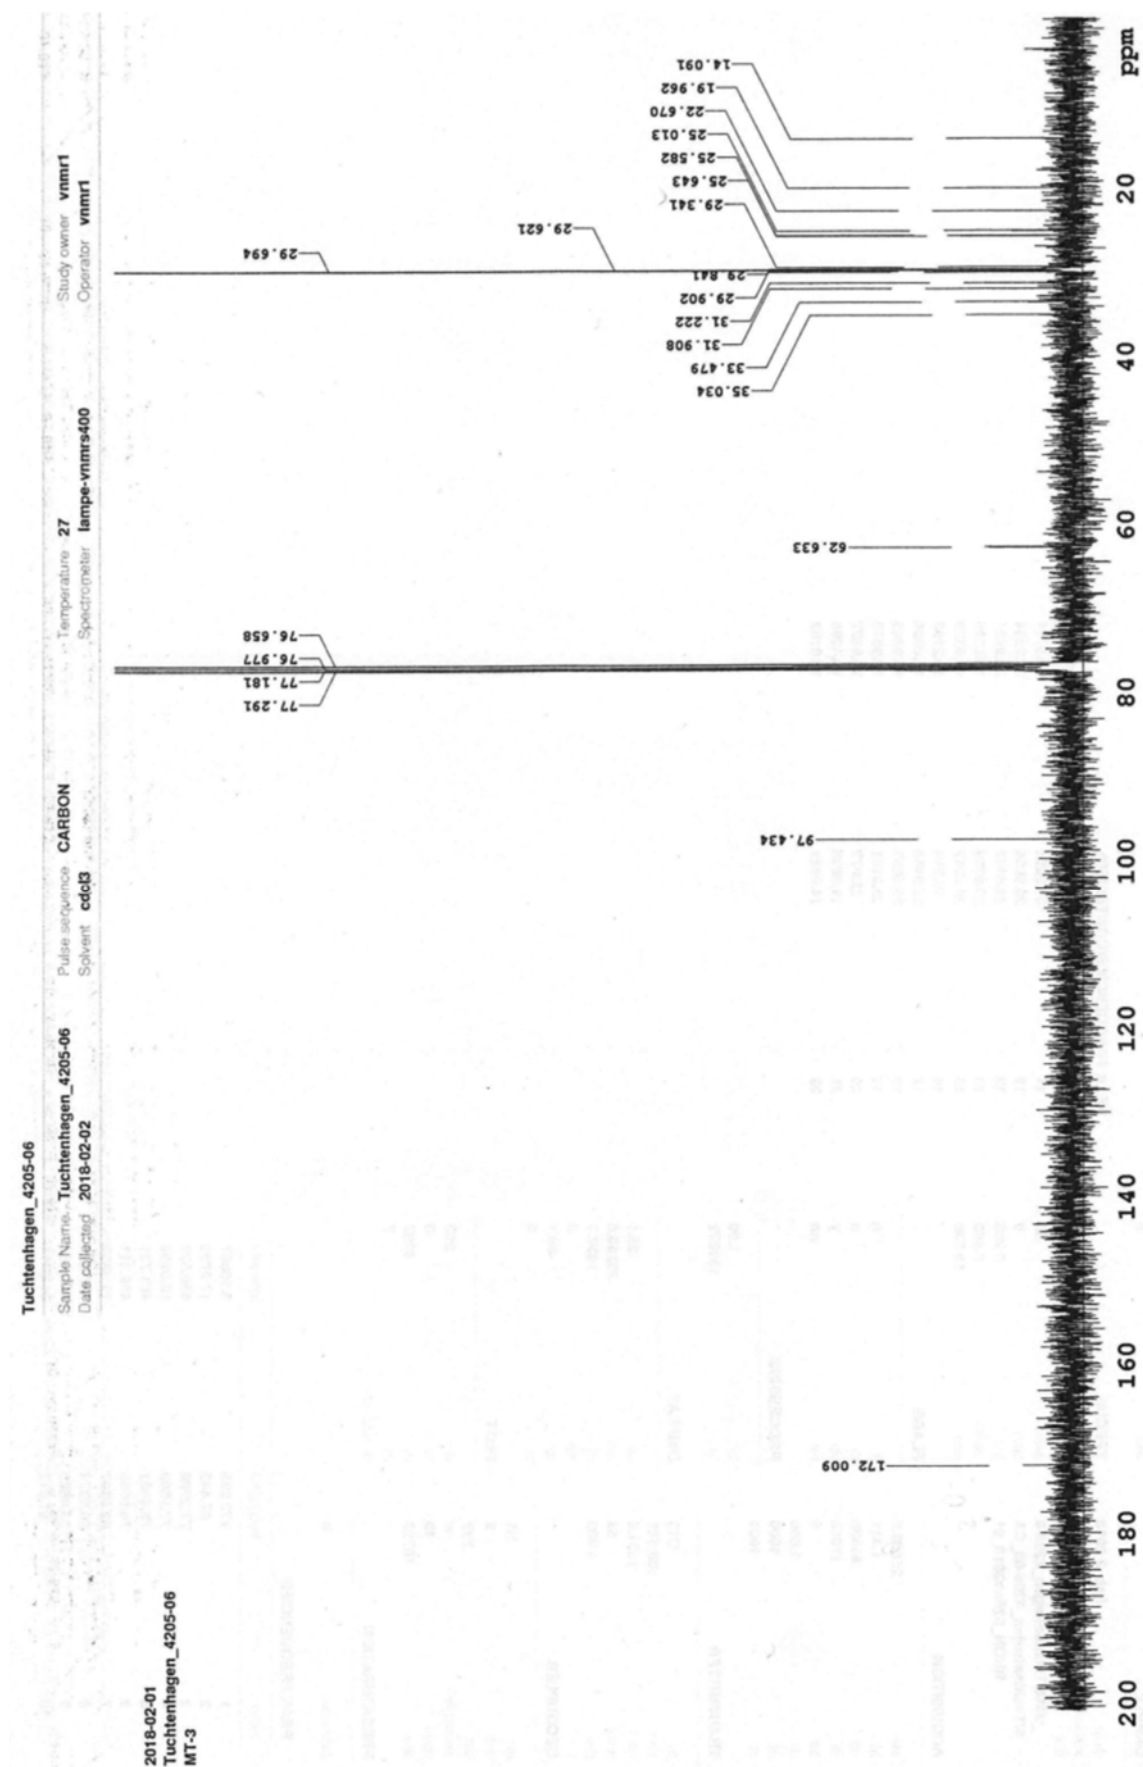

# Organic & Biomolecular Chemistry

Compound **10a** – APCI-MS (positive mode)

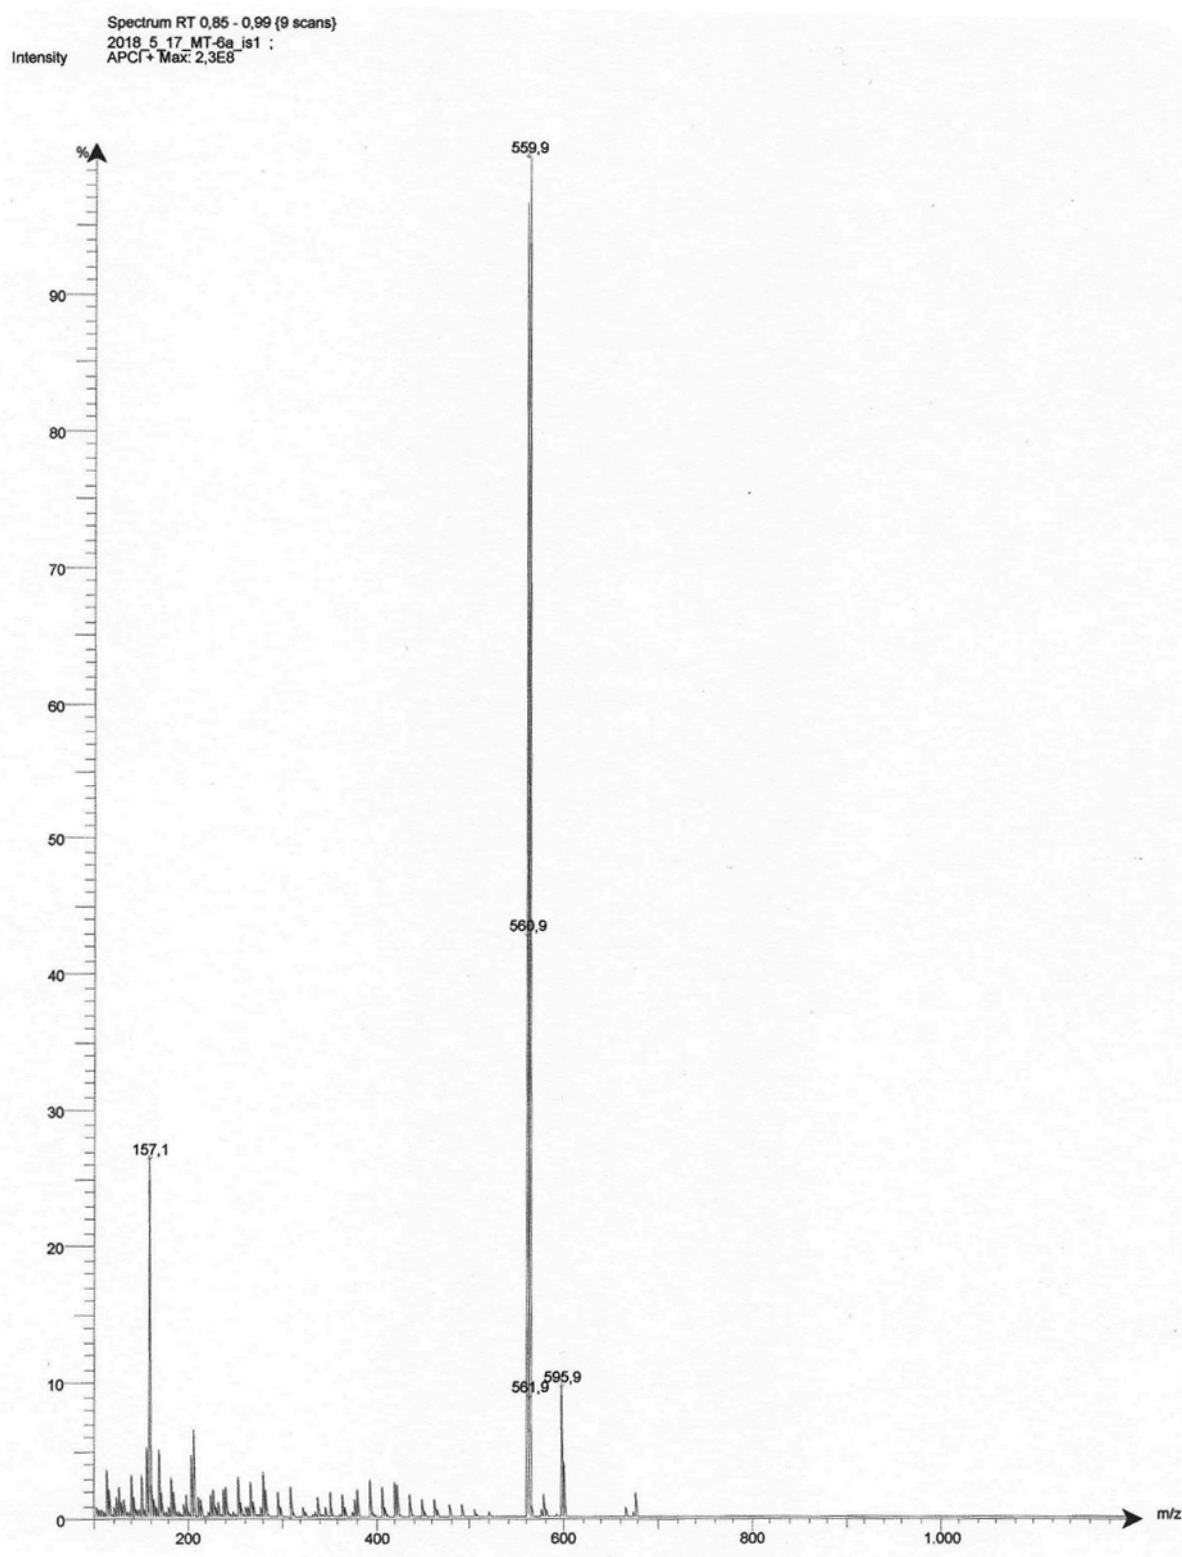

# Organic & Biomolecular Chemistry

## Compound 10a – $^1\text{H}$ NMR

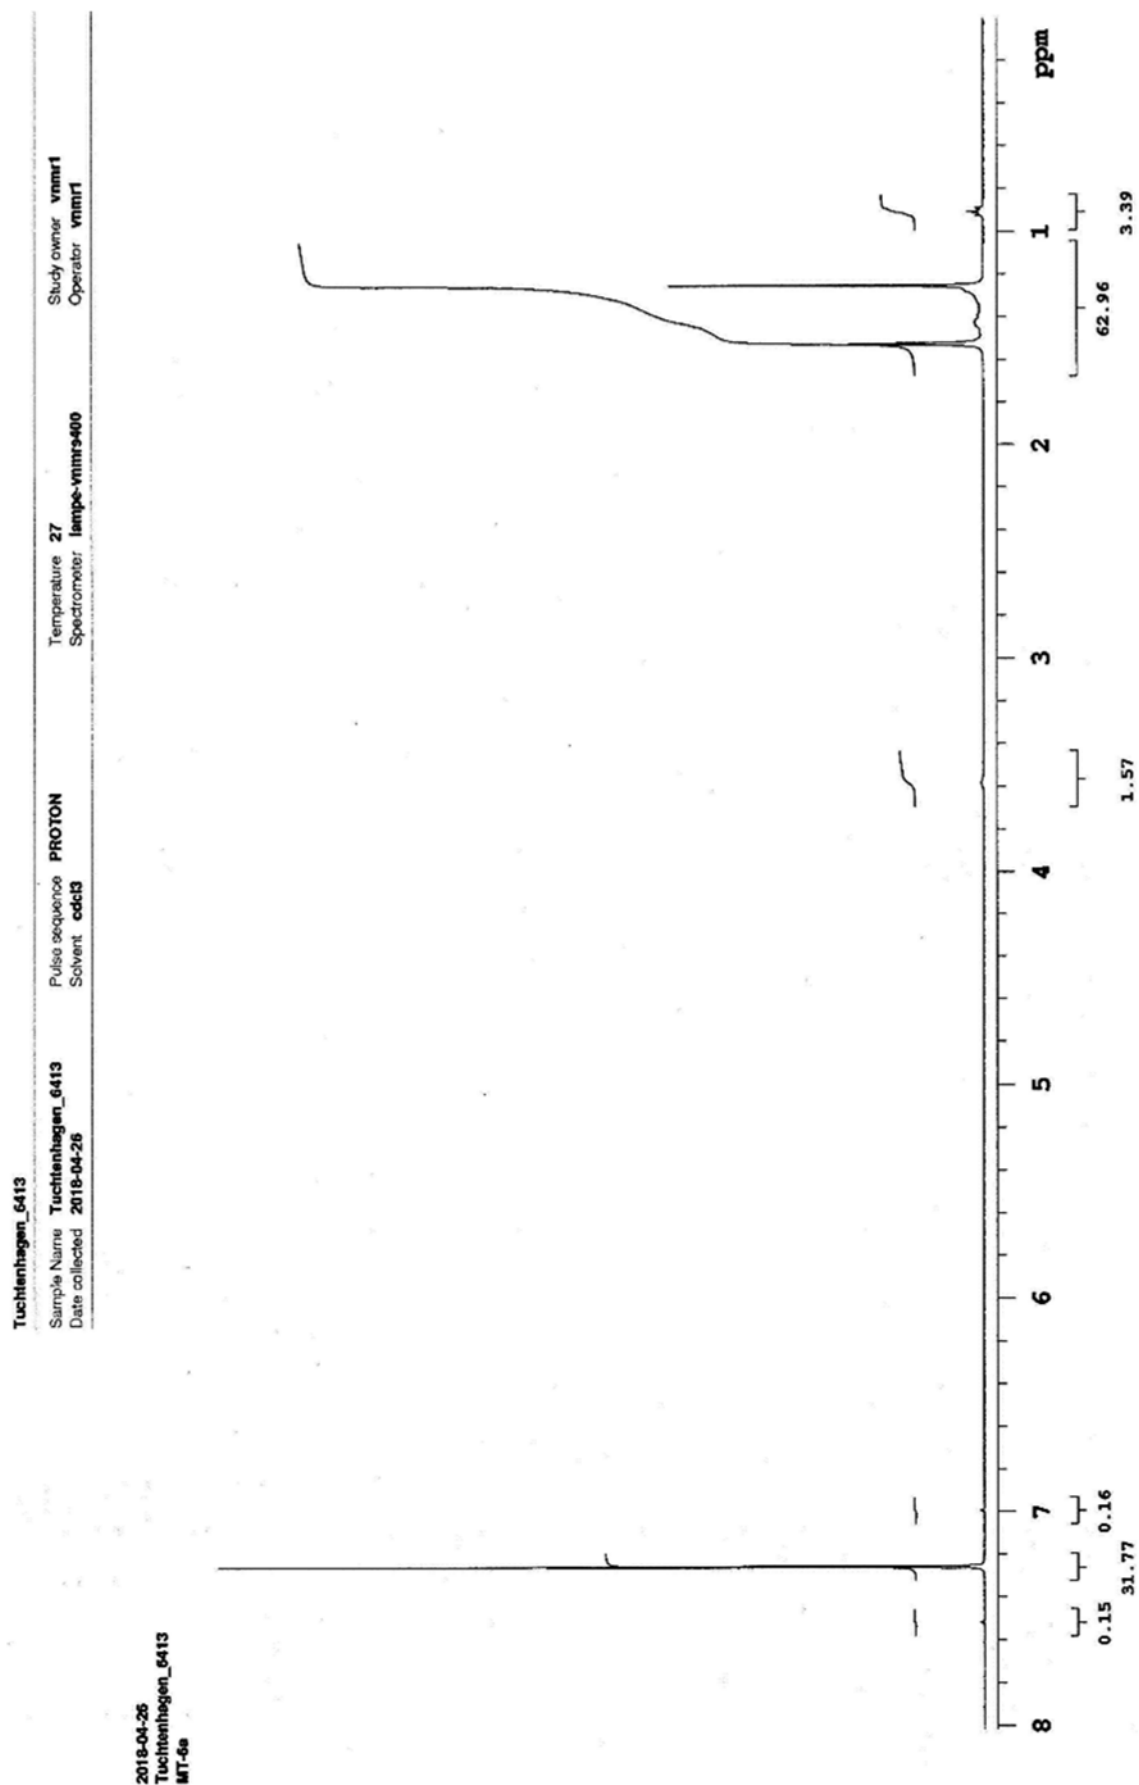

# Organic & Biomolecular Chemistry

Compound 10a –  $^{13}\text{C}$  NMR

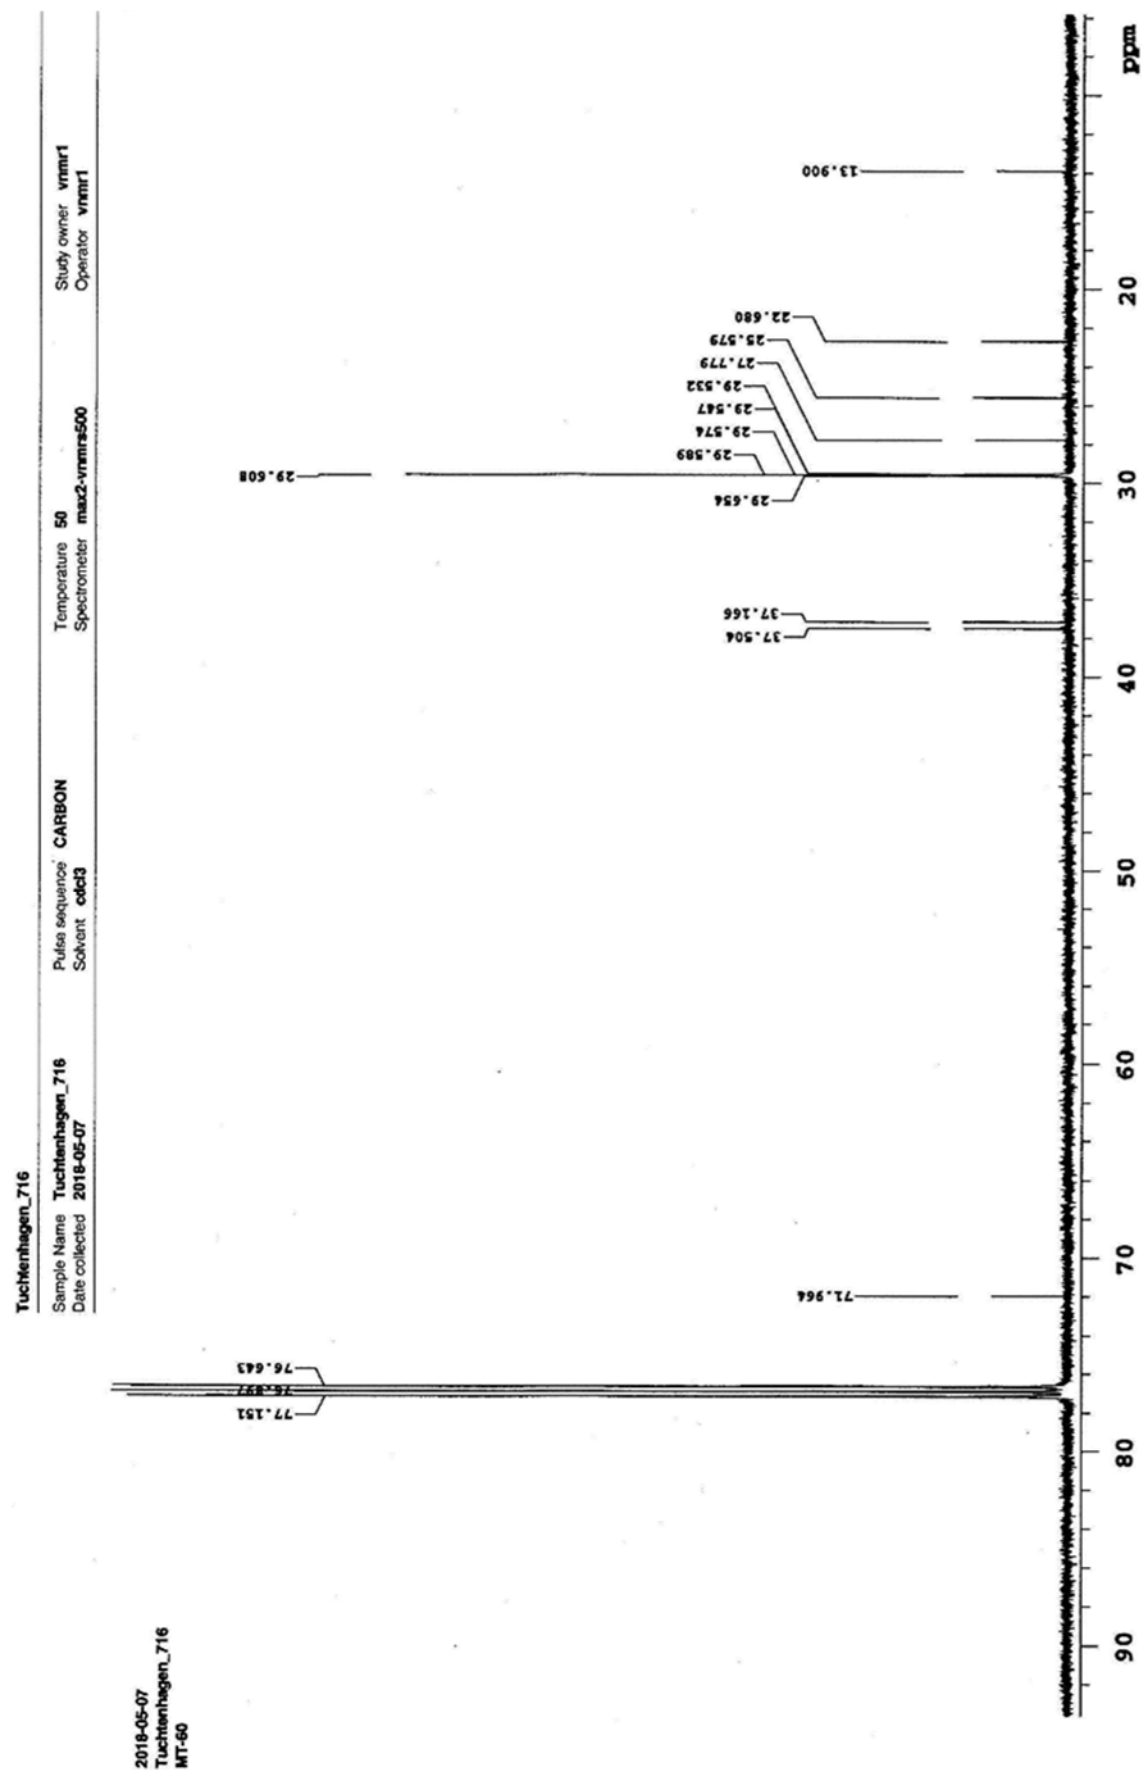

# Organic & Biomolecular Chemistry

Compound **10b** – APCI-MS (positive mode)

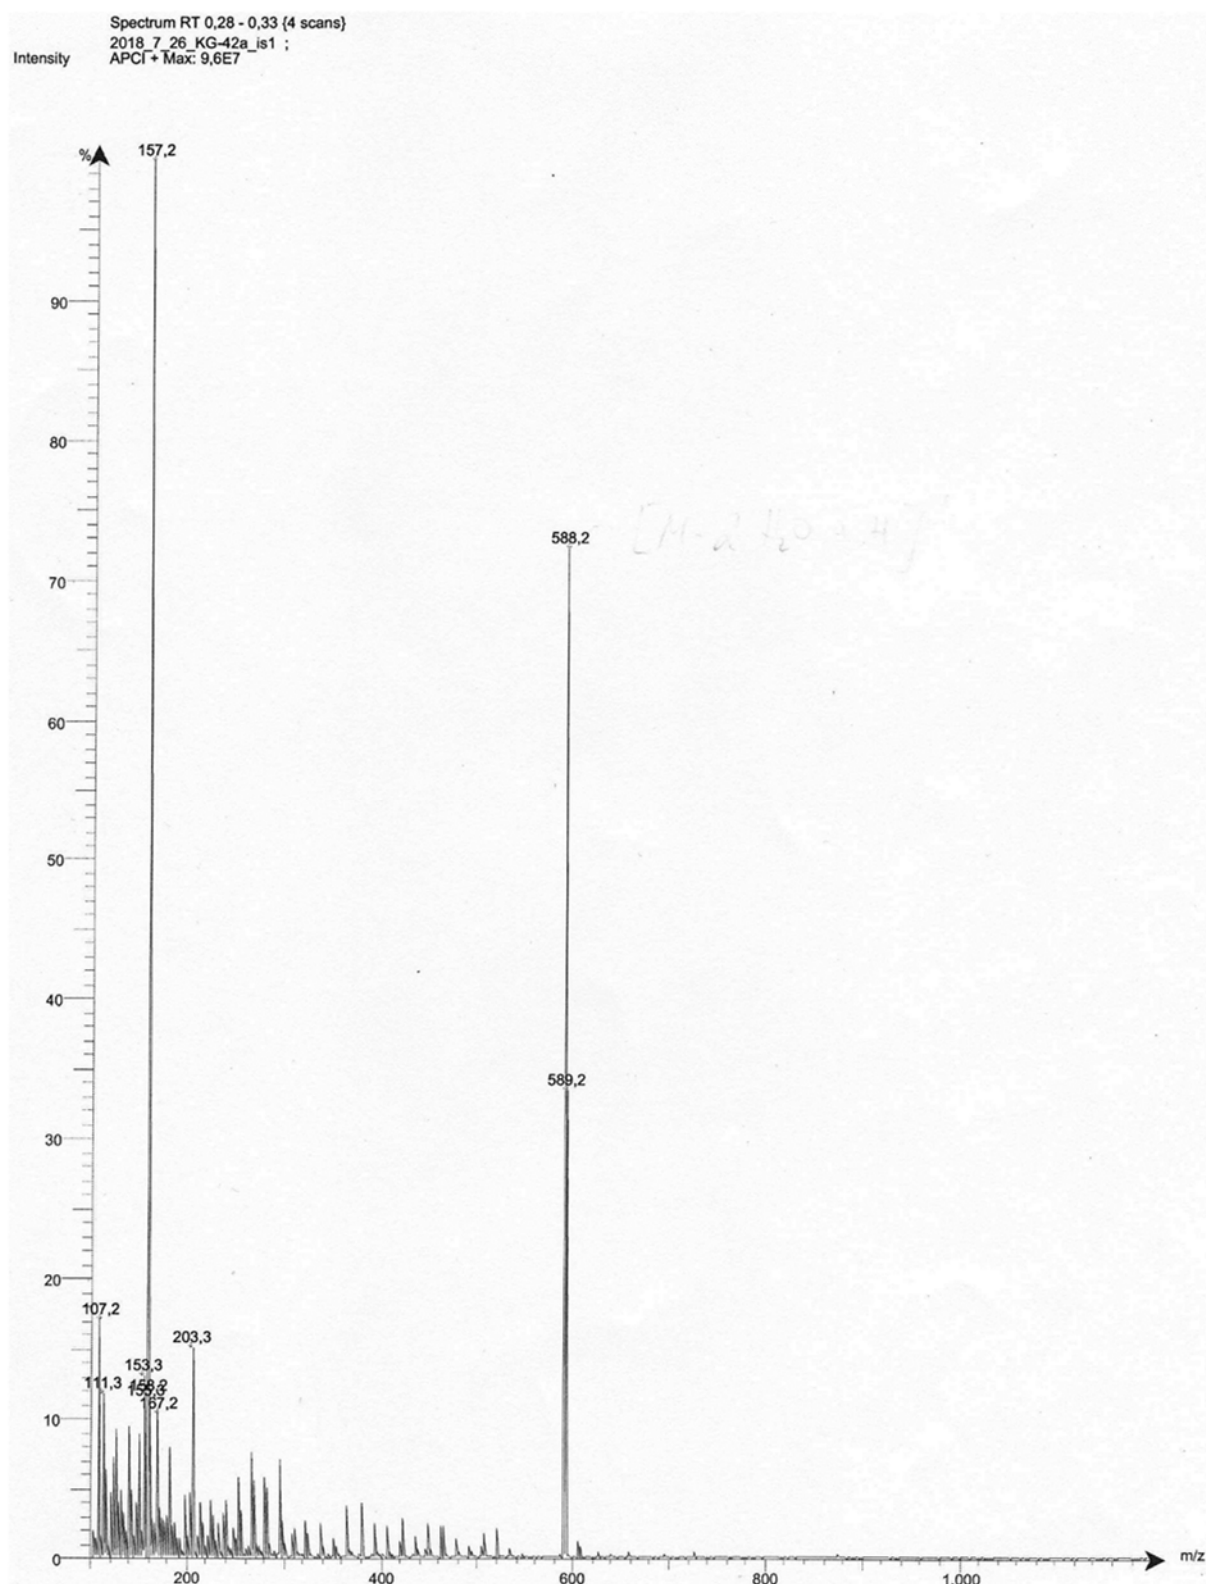

# Organic & Biomolecular Chemistry

Compound 10b -  $^1\text{H}$  NMR

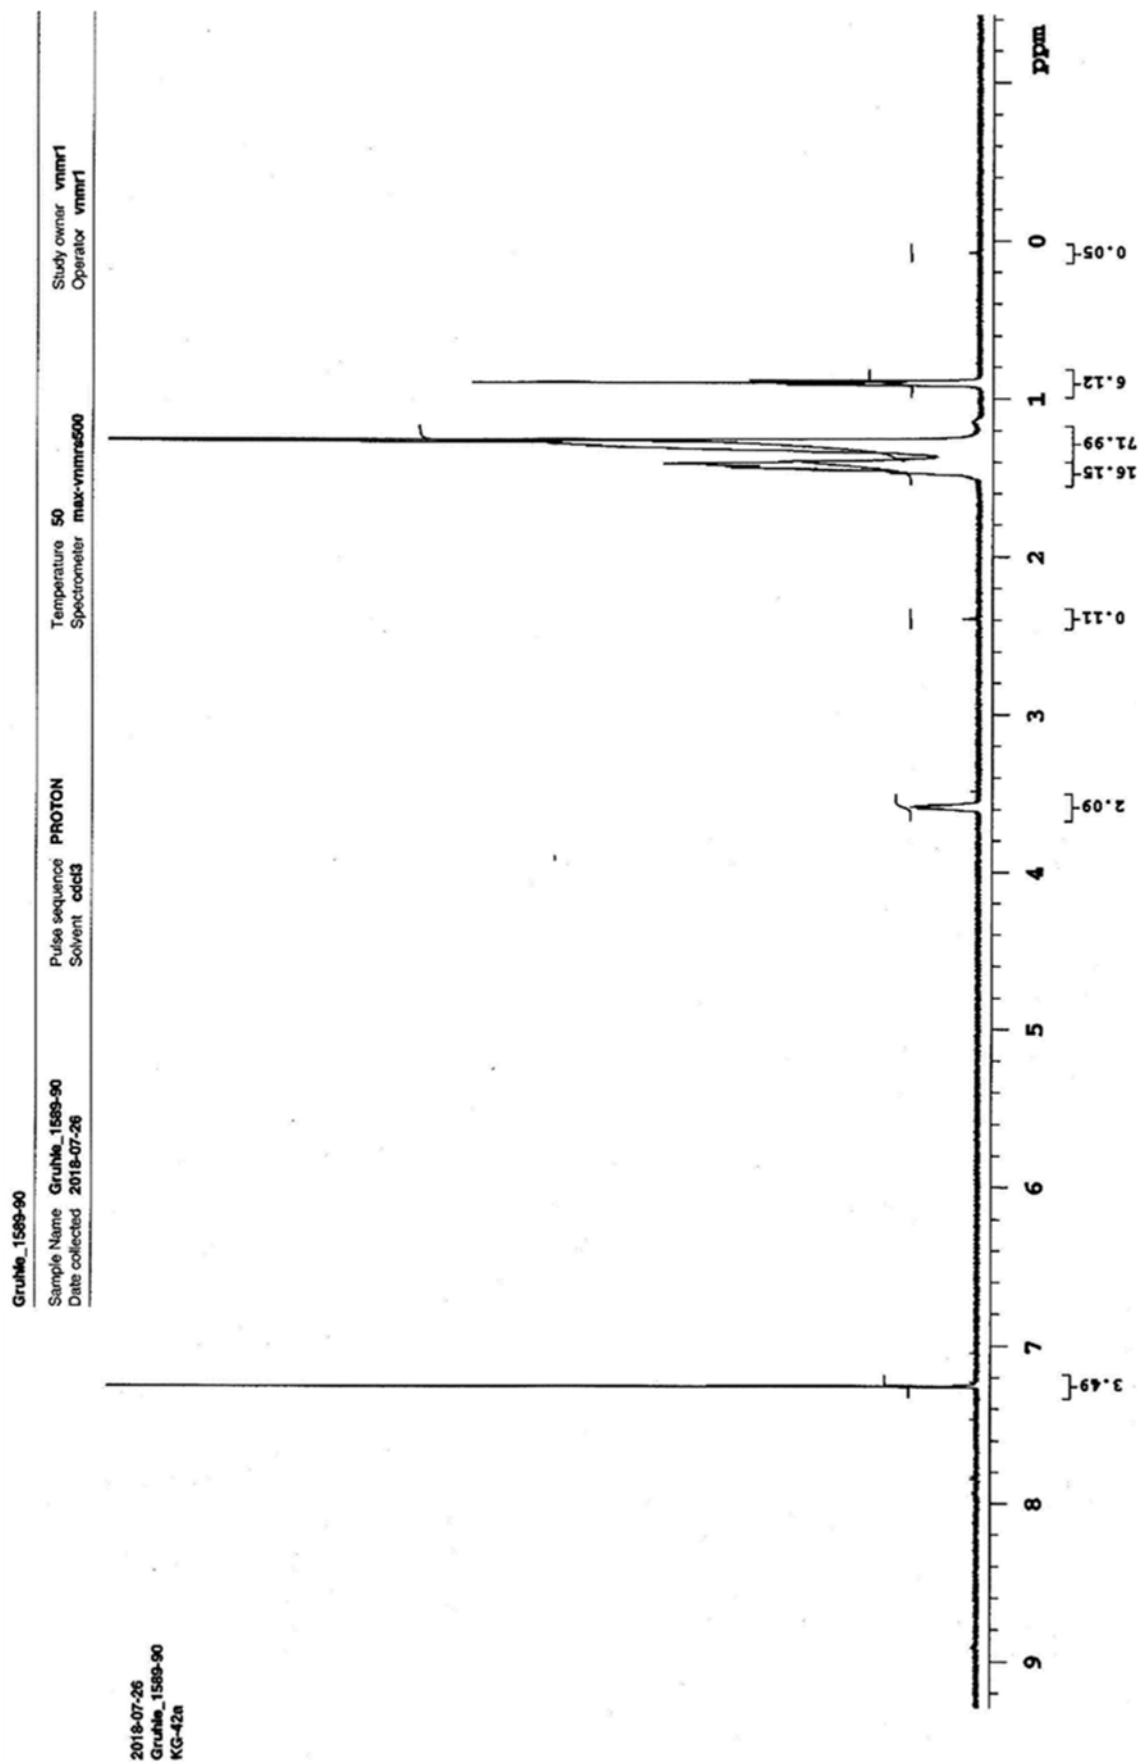



# Organic & Biomolecular Chemistry

Compound 10b –  $^{13}\text{C}$  NMR

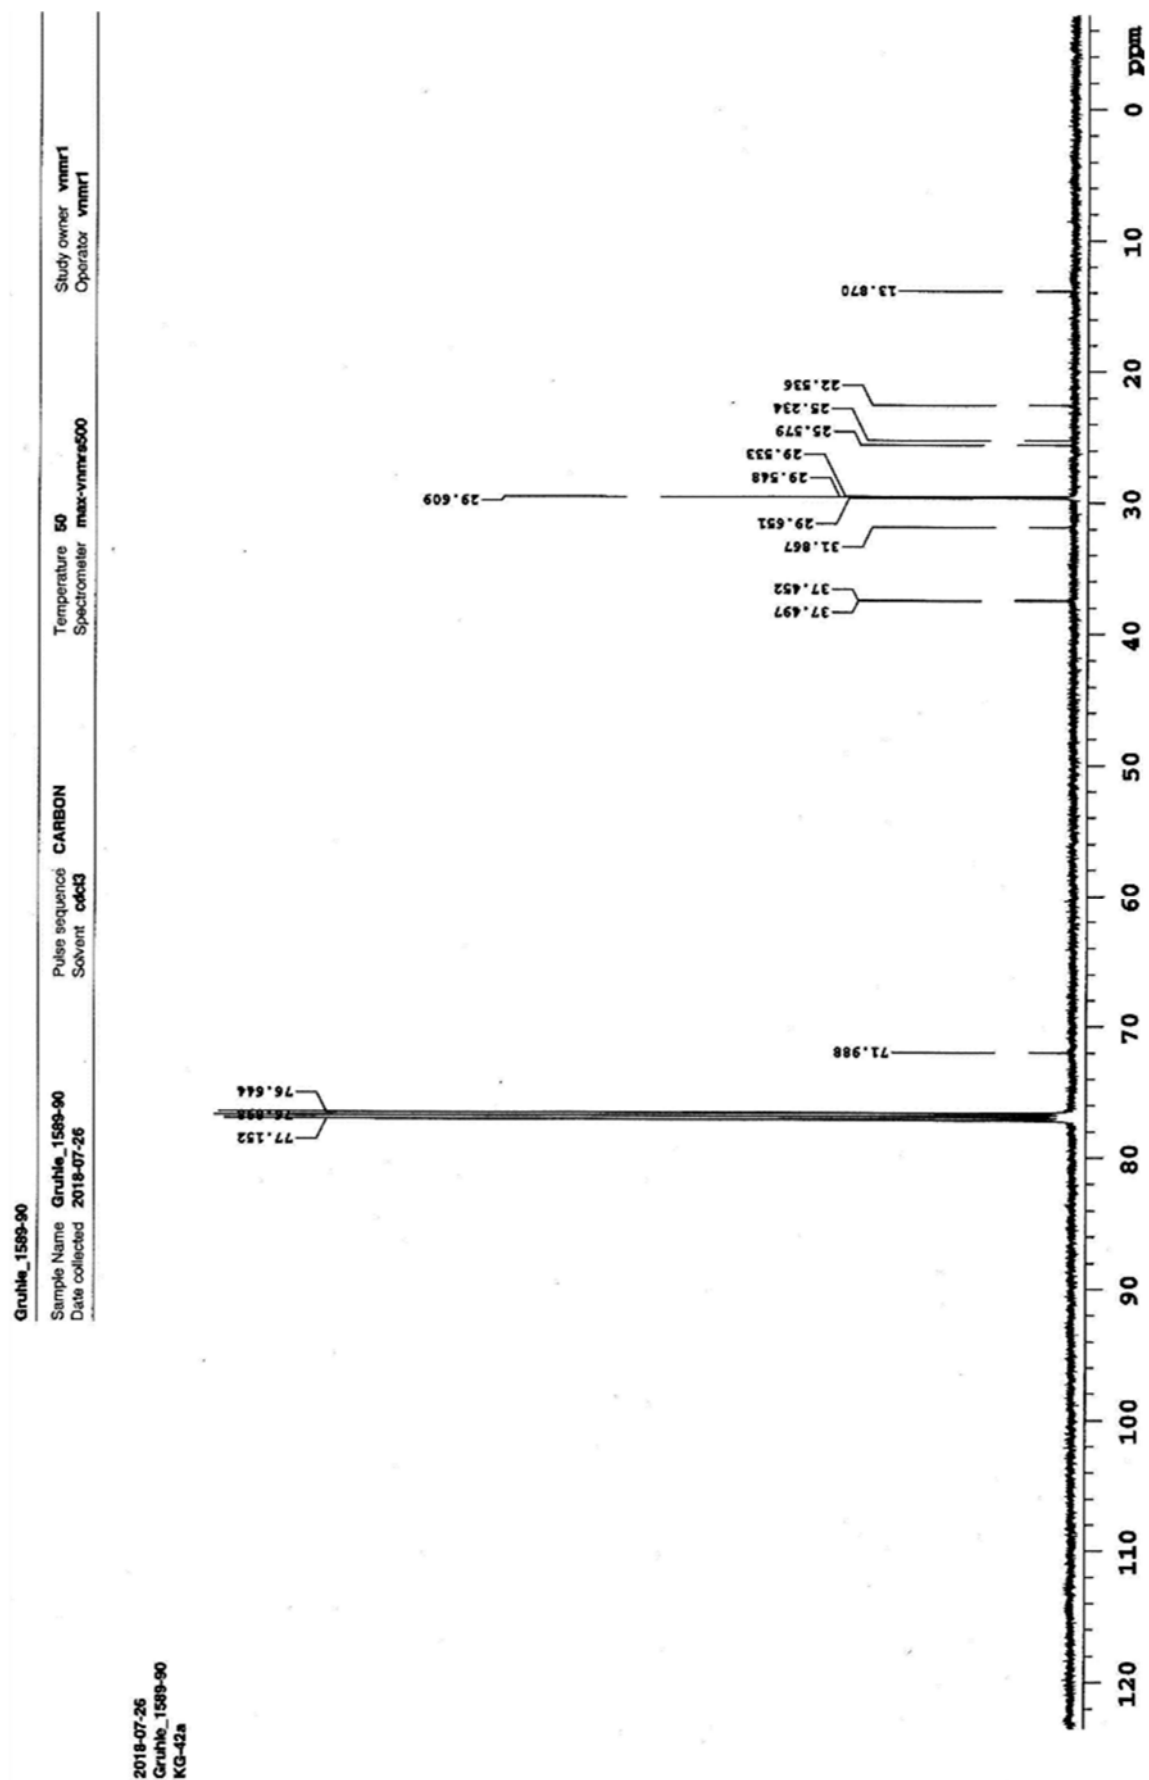

# Organic & Biomolecular Chemistry

Compound 10c – APCI-MS (positive mode)

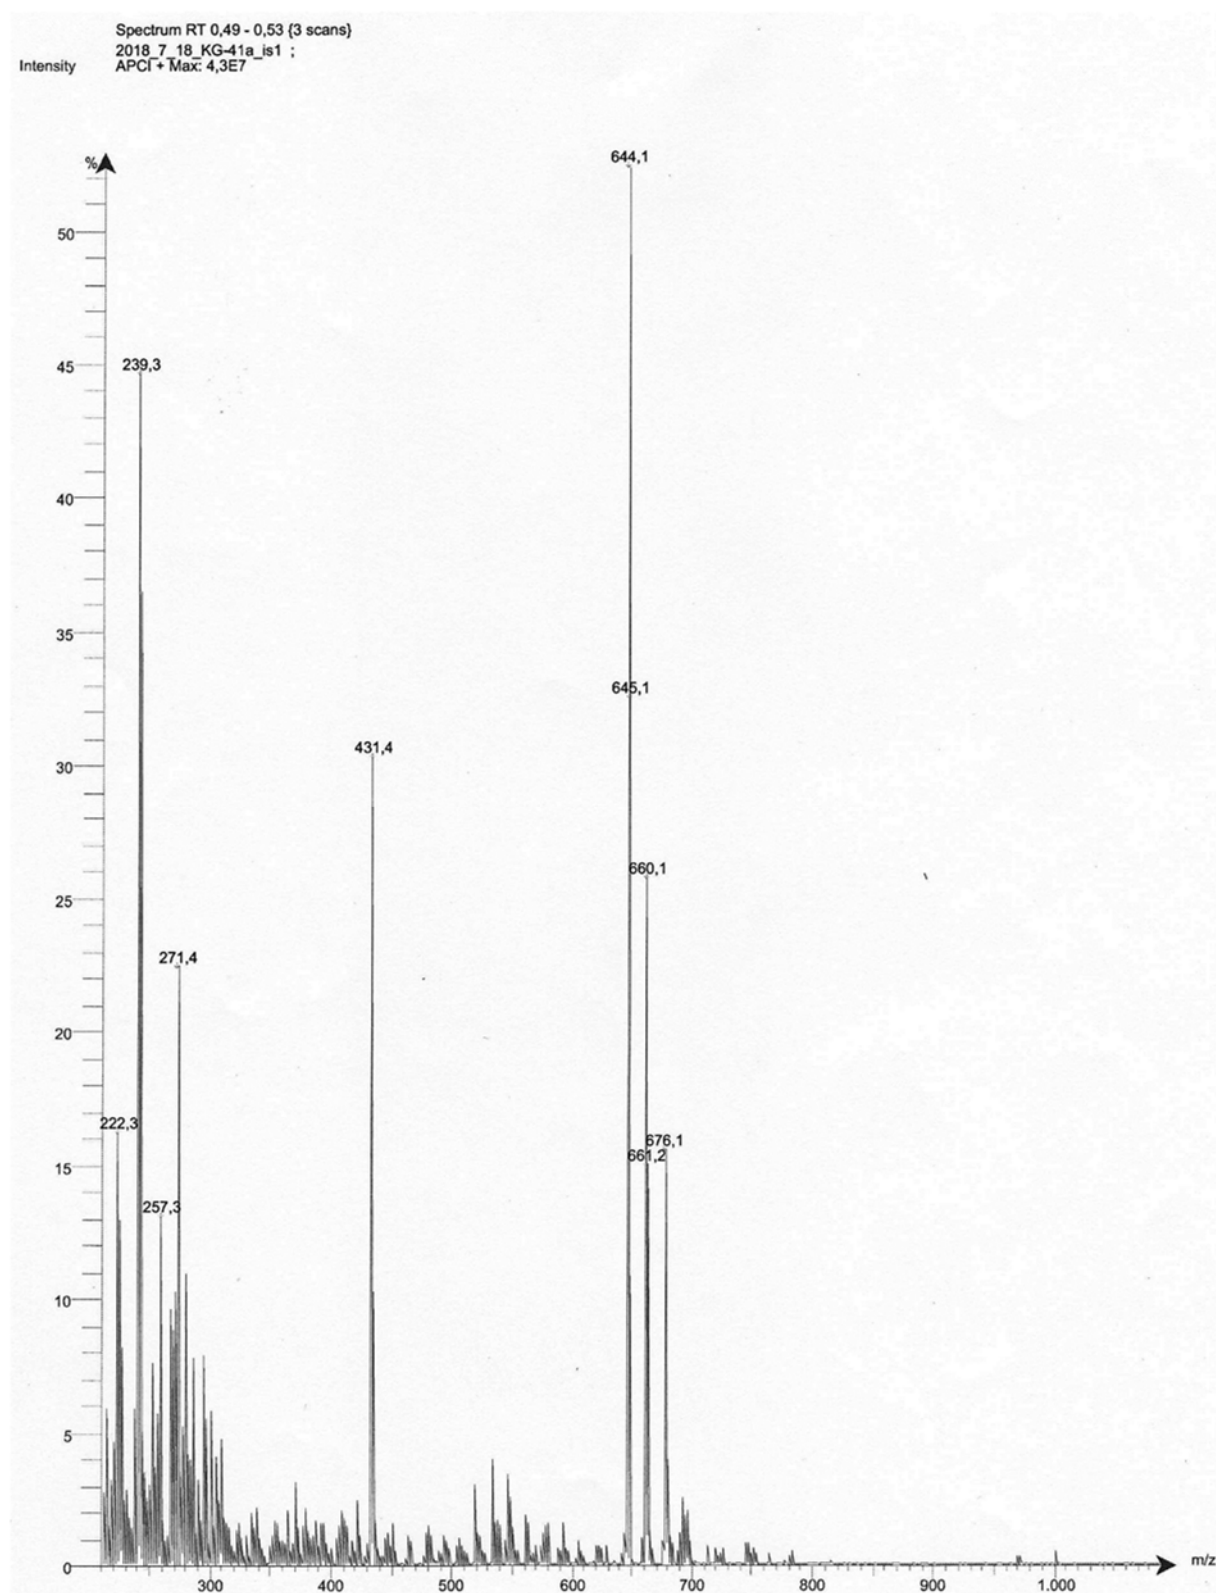

# Organic & Biomolecular Chemistry

Compound 10c –  $^1\text{H}$  NMR

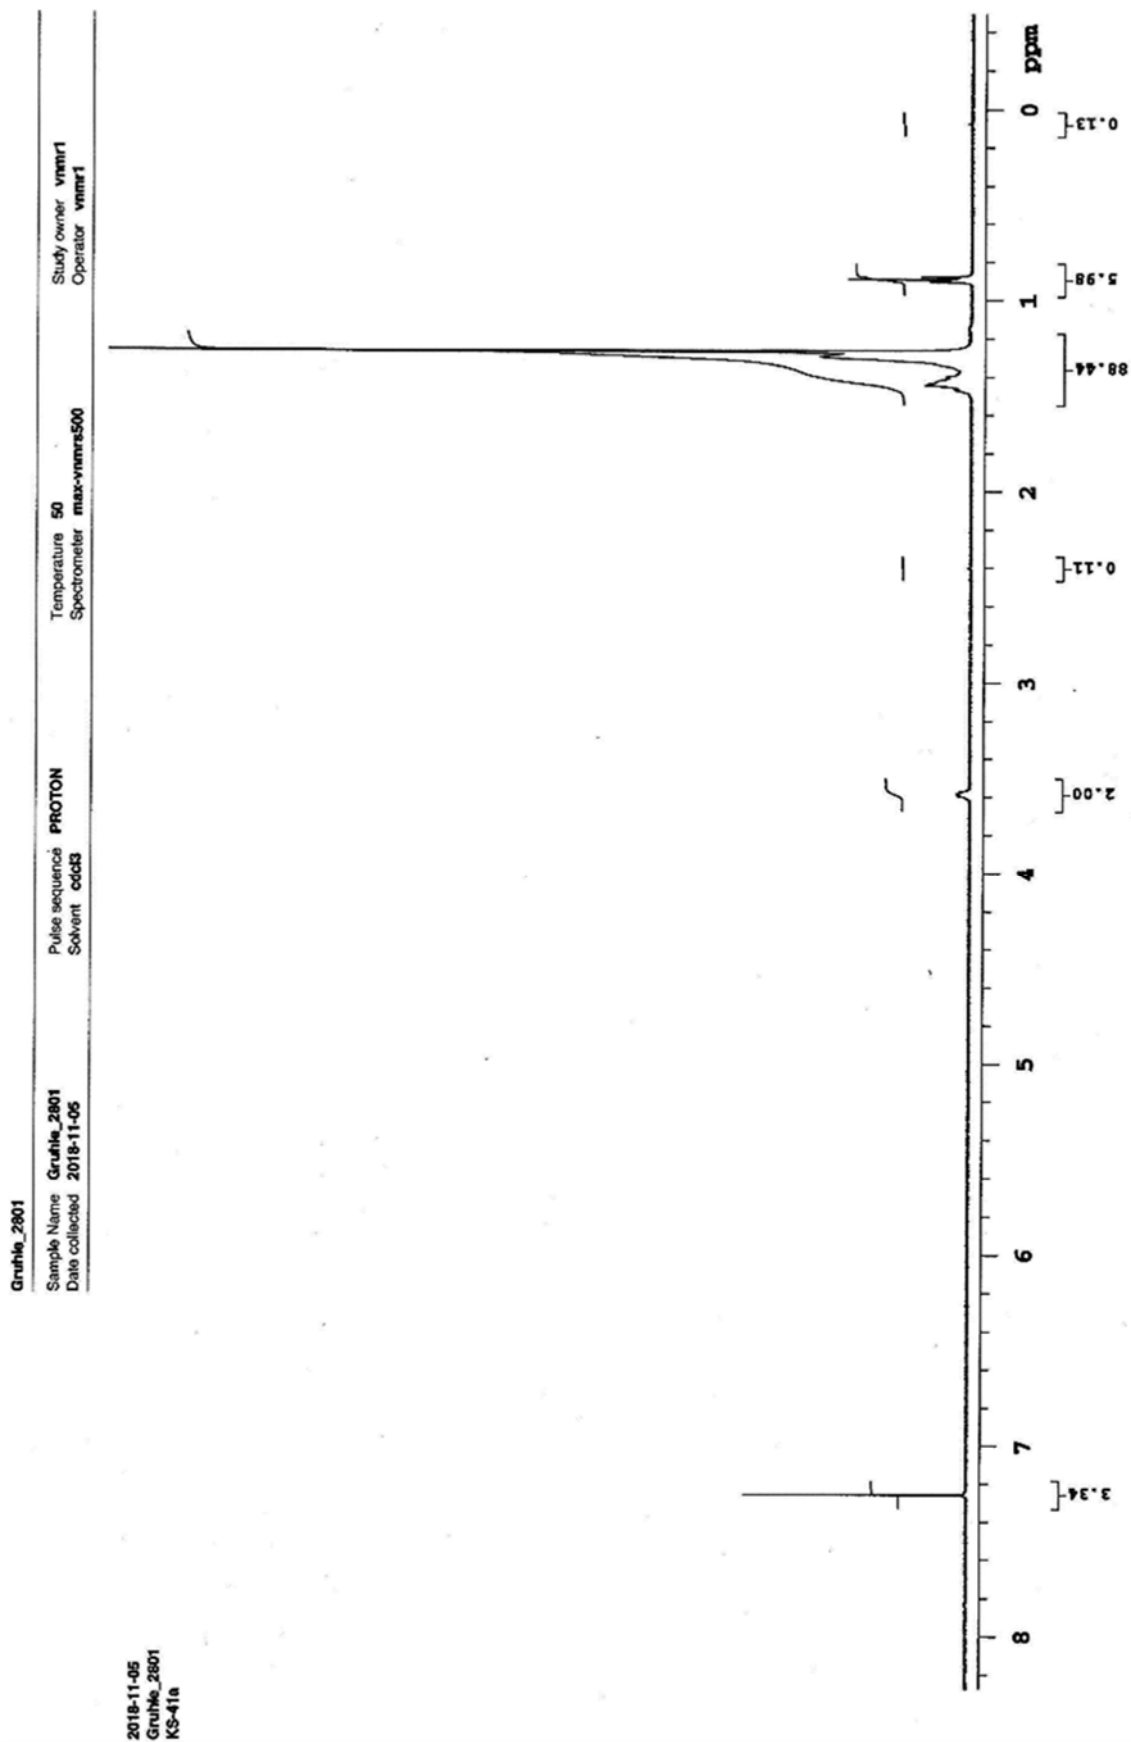

# Organic & Biomolecular Chemistry

Compound 10c –  $^{13}\text{C}$  NMR

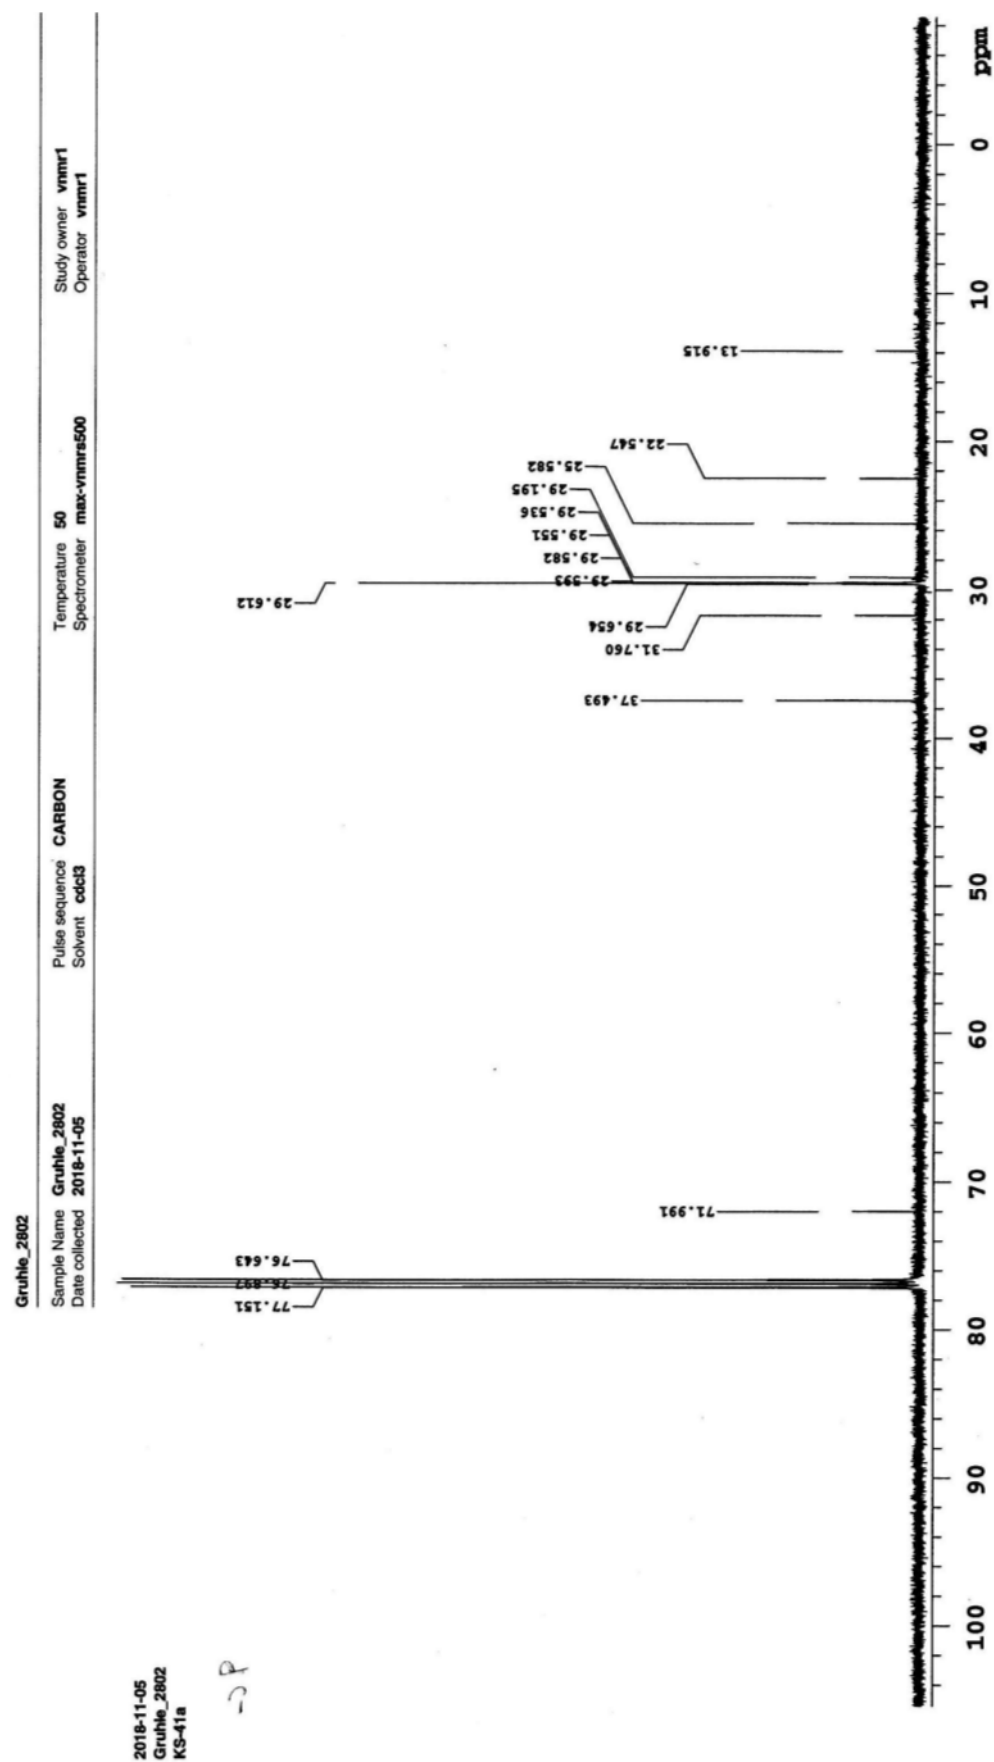

# Organic & Biomolecular Chemistry

Compound **10d** – APCI-MS (positive mode)

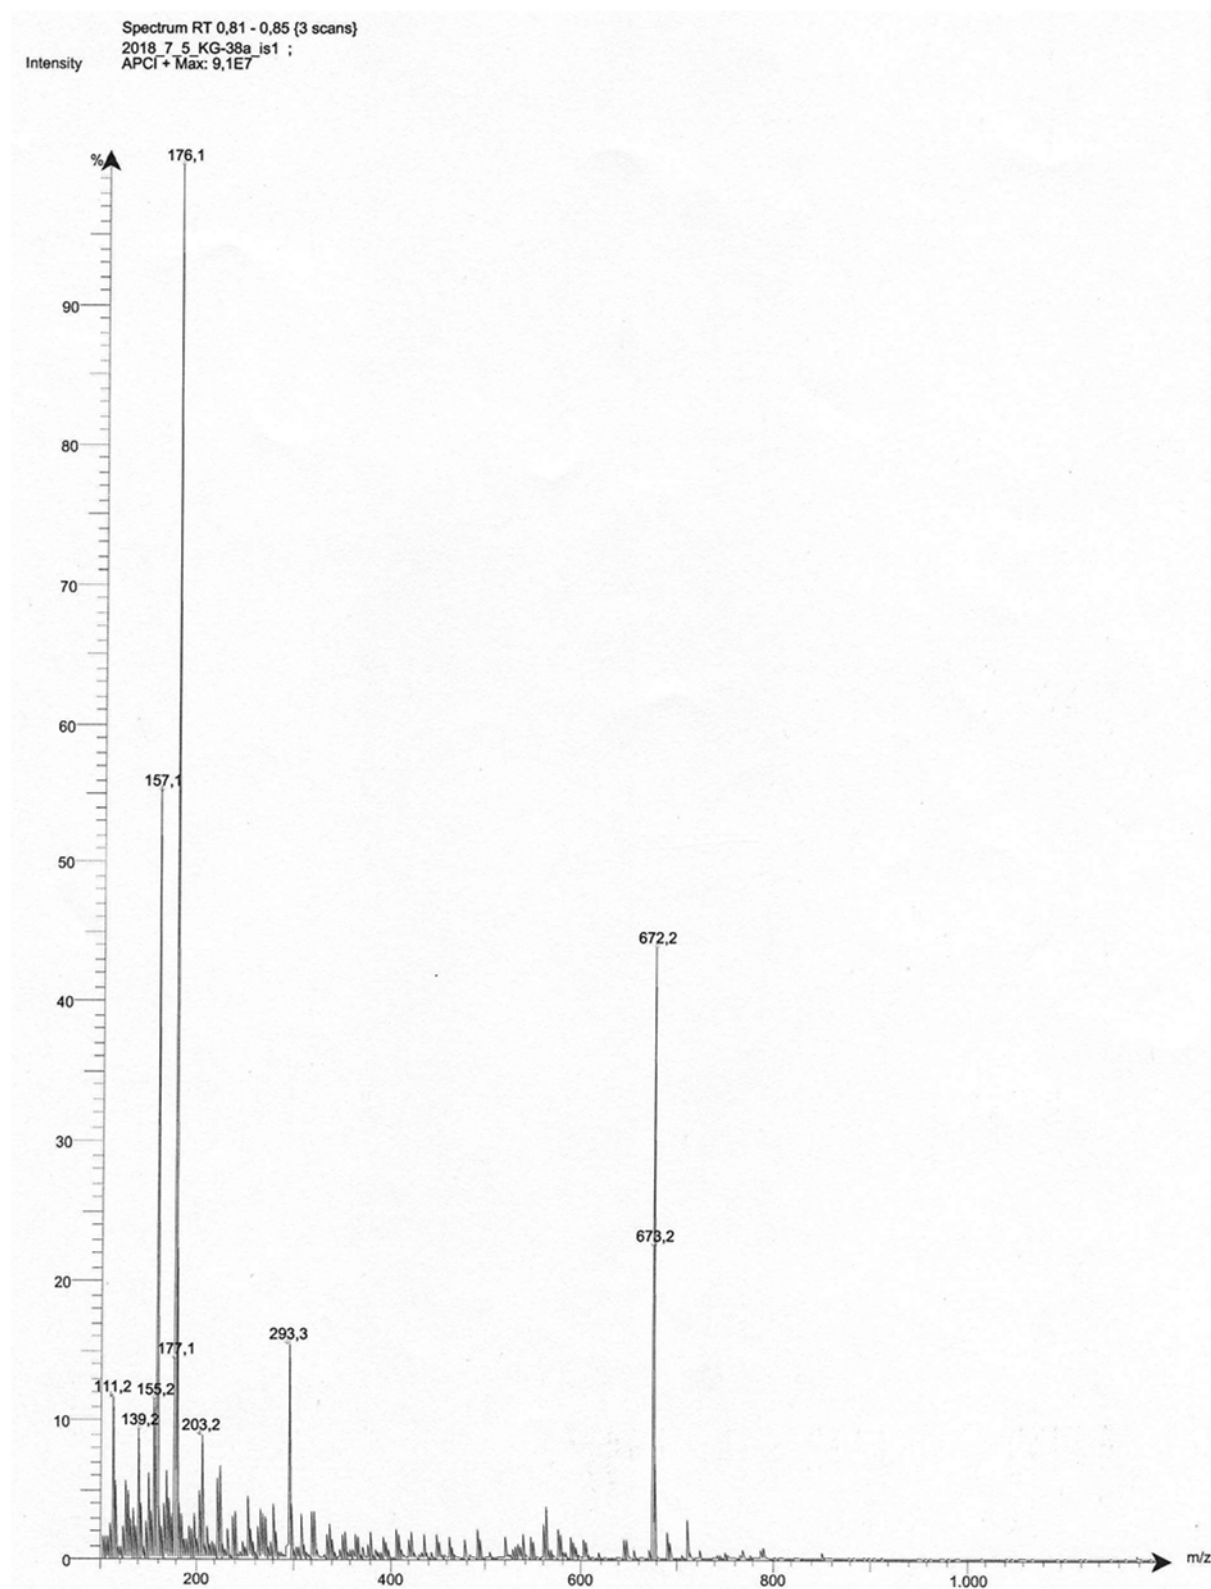

# Organic & Biomolecular Chemistry

Compound 10d -  $^1\text{H}$  NMR

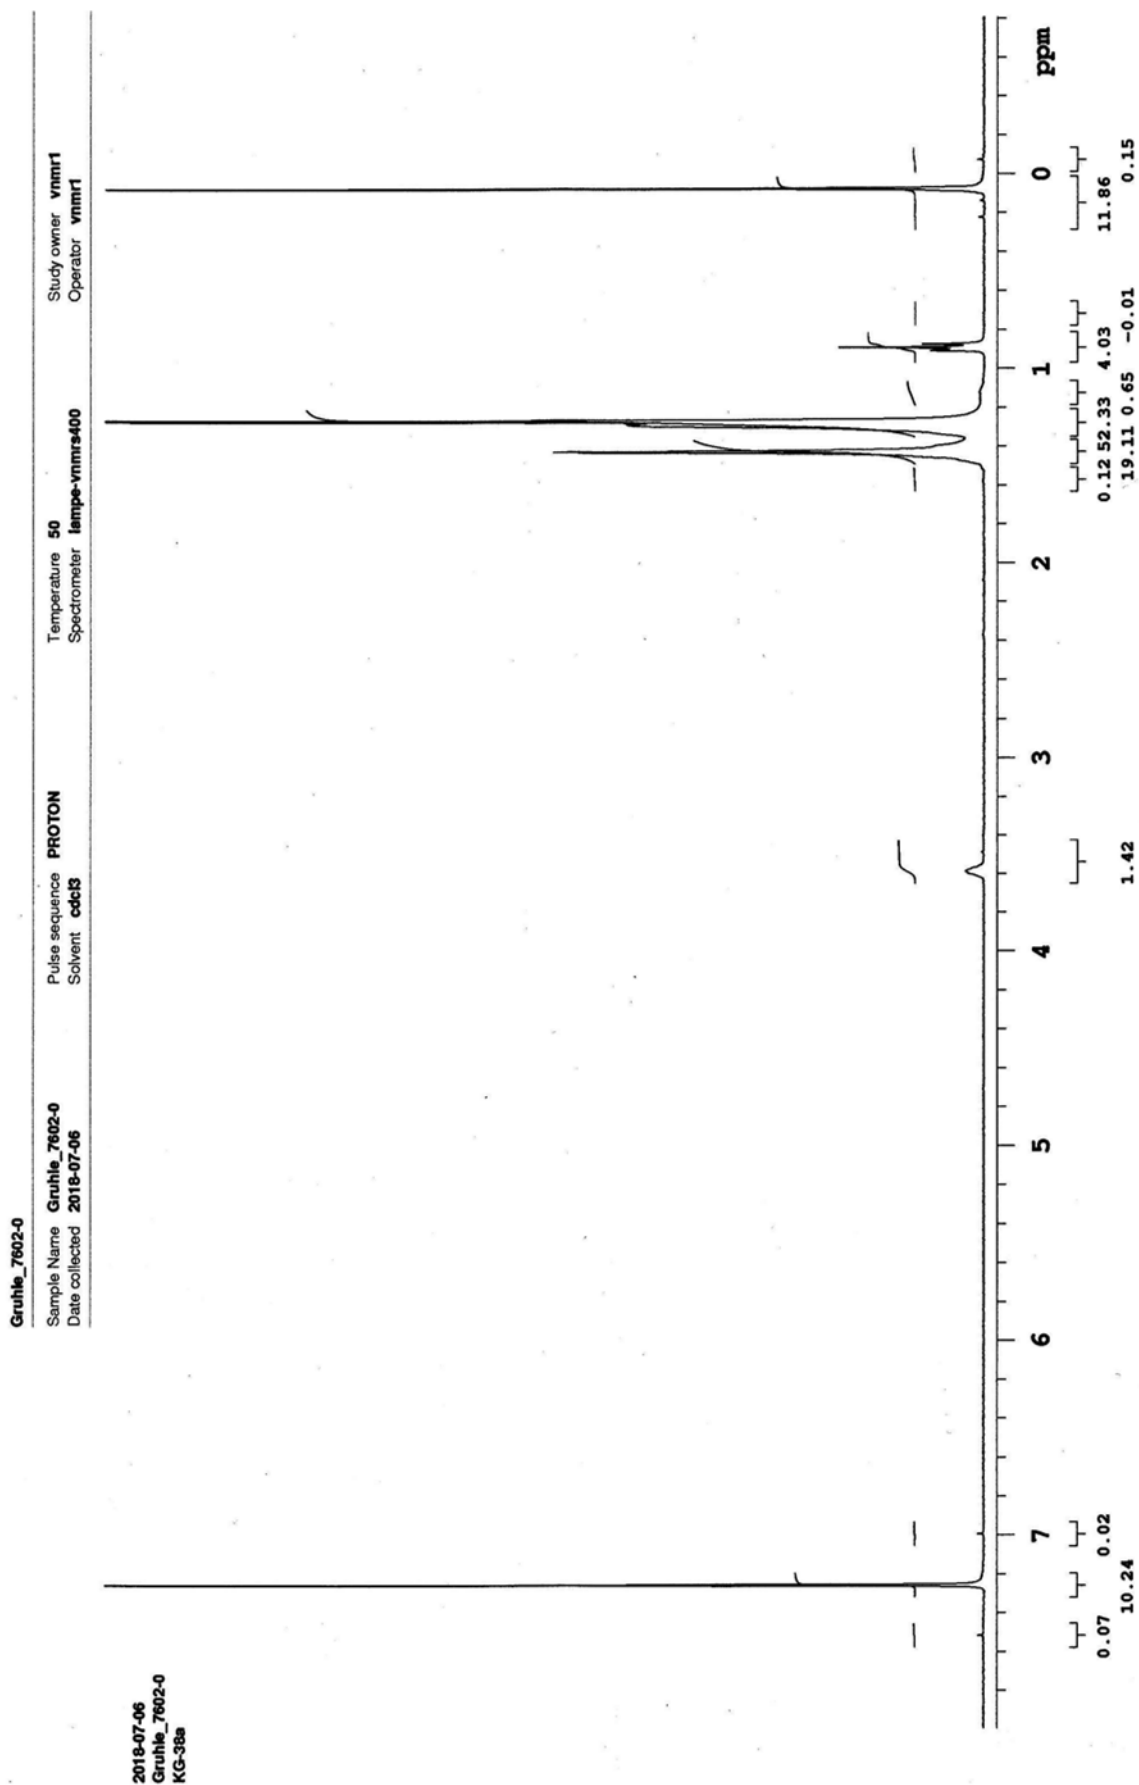

# Organic & Biomolecular Chemistry

Compound 10d –  $^{13}\text{C}$  NMR

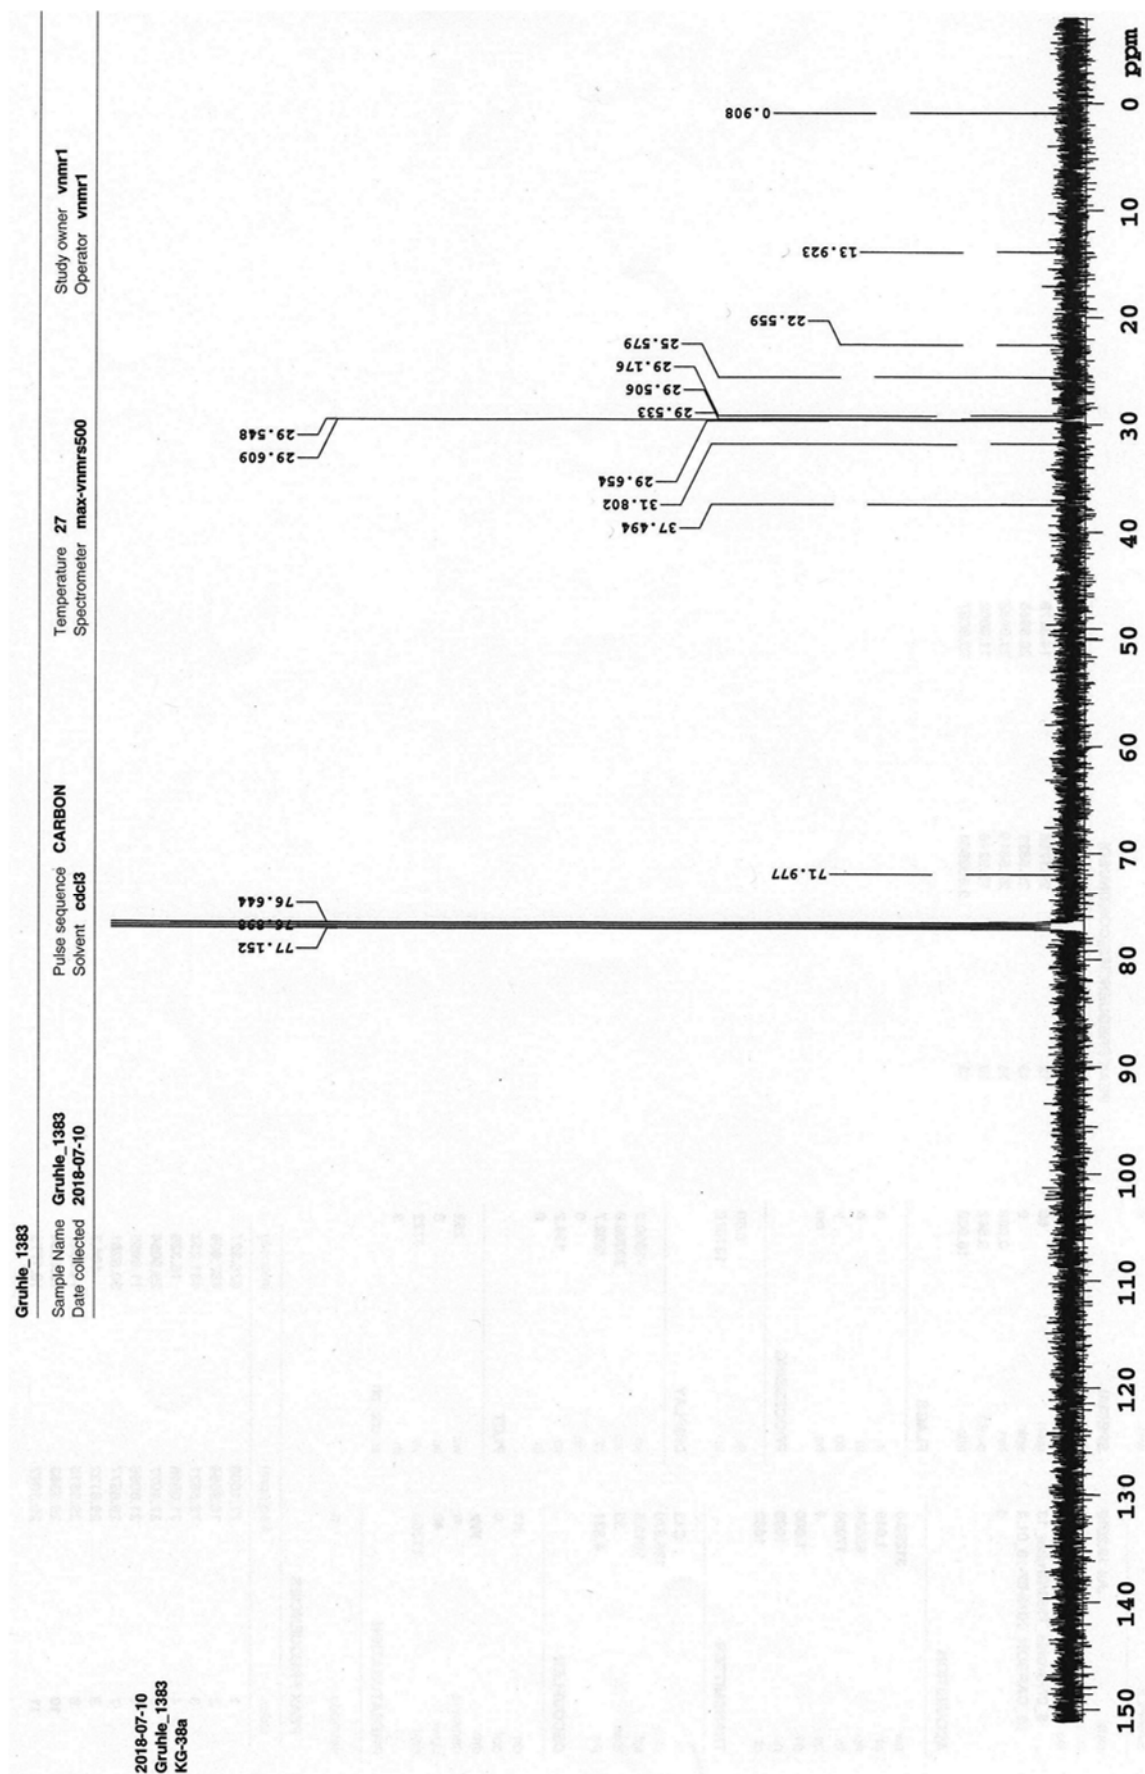

# Organic & Biomolecular Chemistry

Compound **10e** – APCI-MS (positive mode)

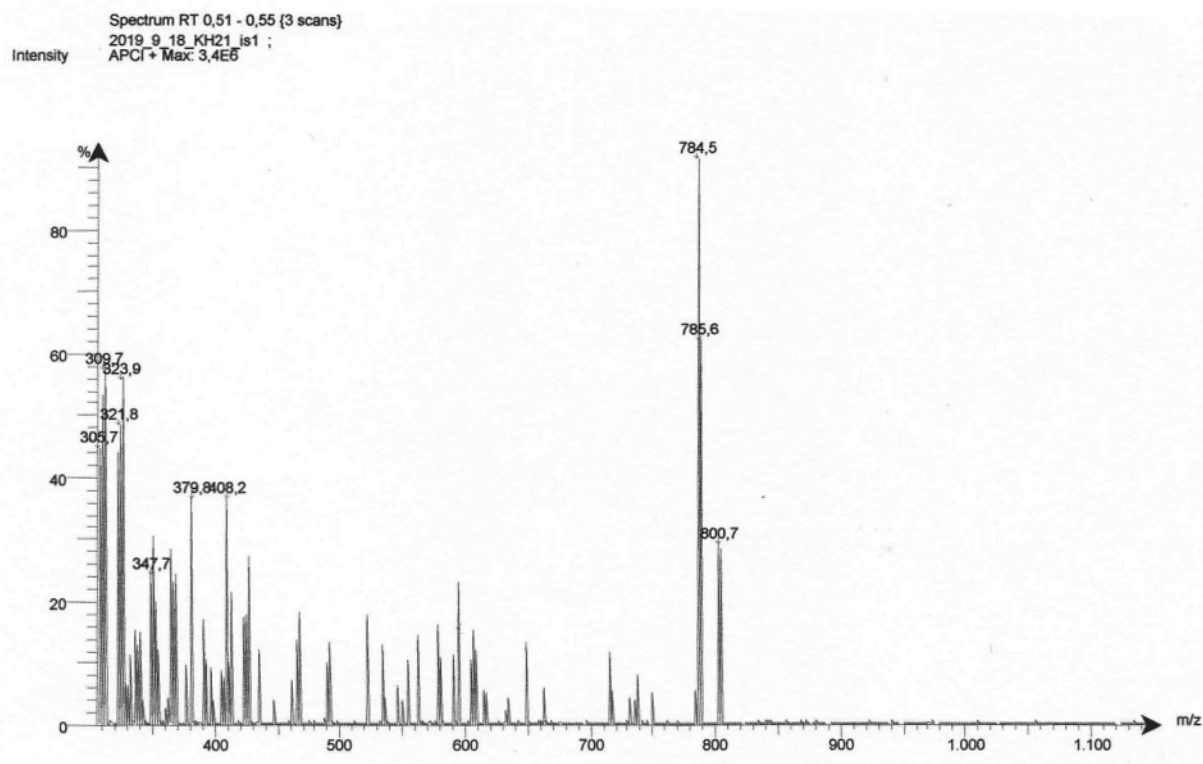



# Organic & Biomolecular Chemistry

## Compound 10e – <sup>1</sup>H NMR

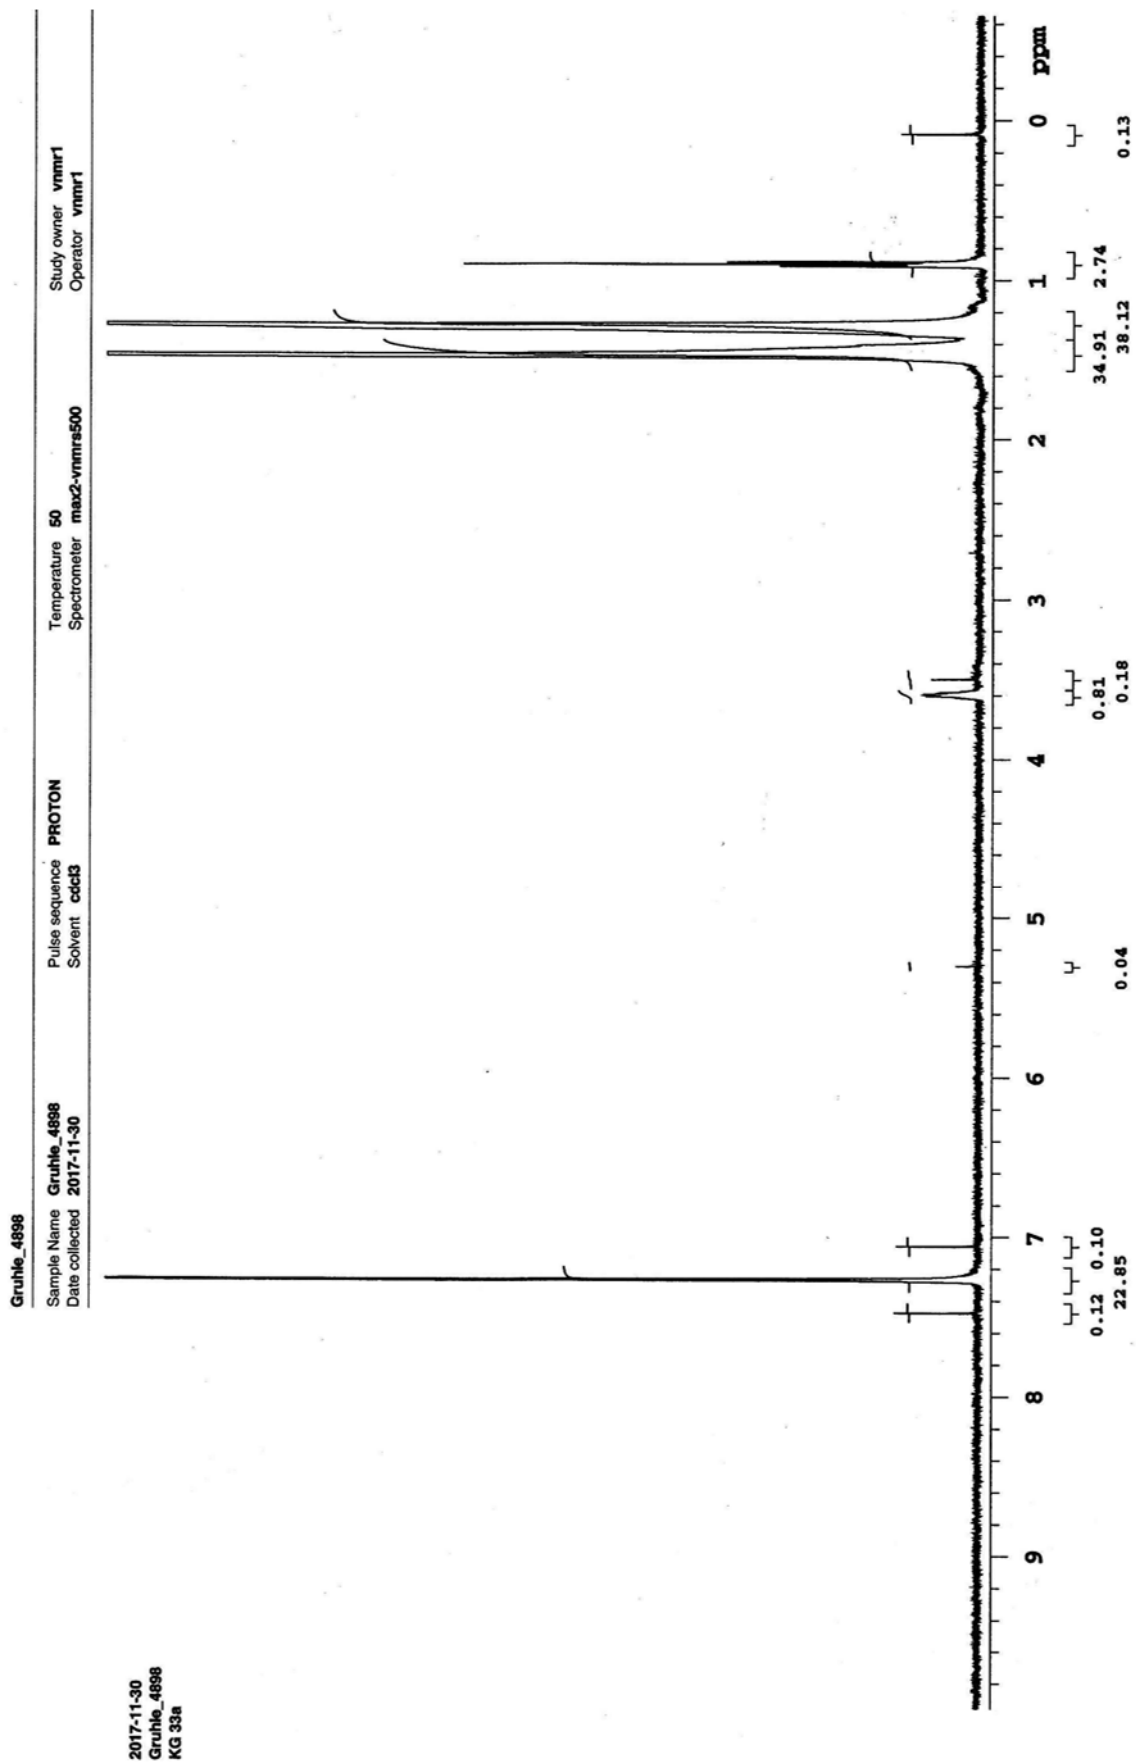

# Organic & Biomolecular Chemistry

Compound 10e –  $^{13}\text{C}$  NMR

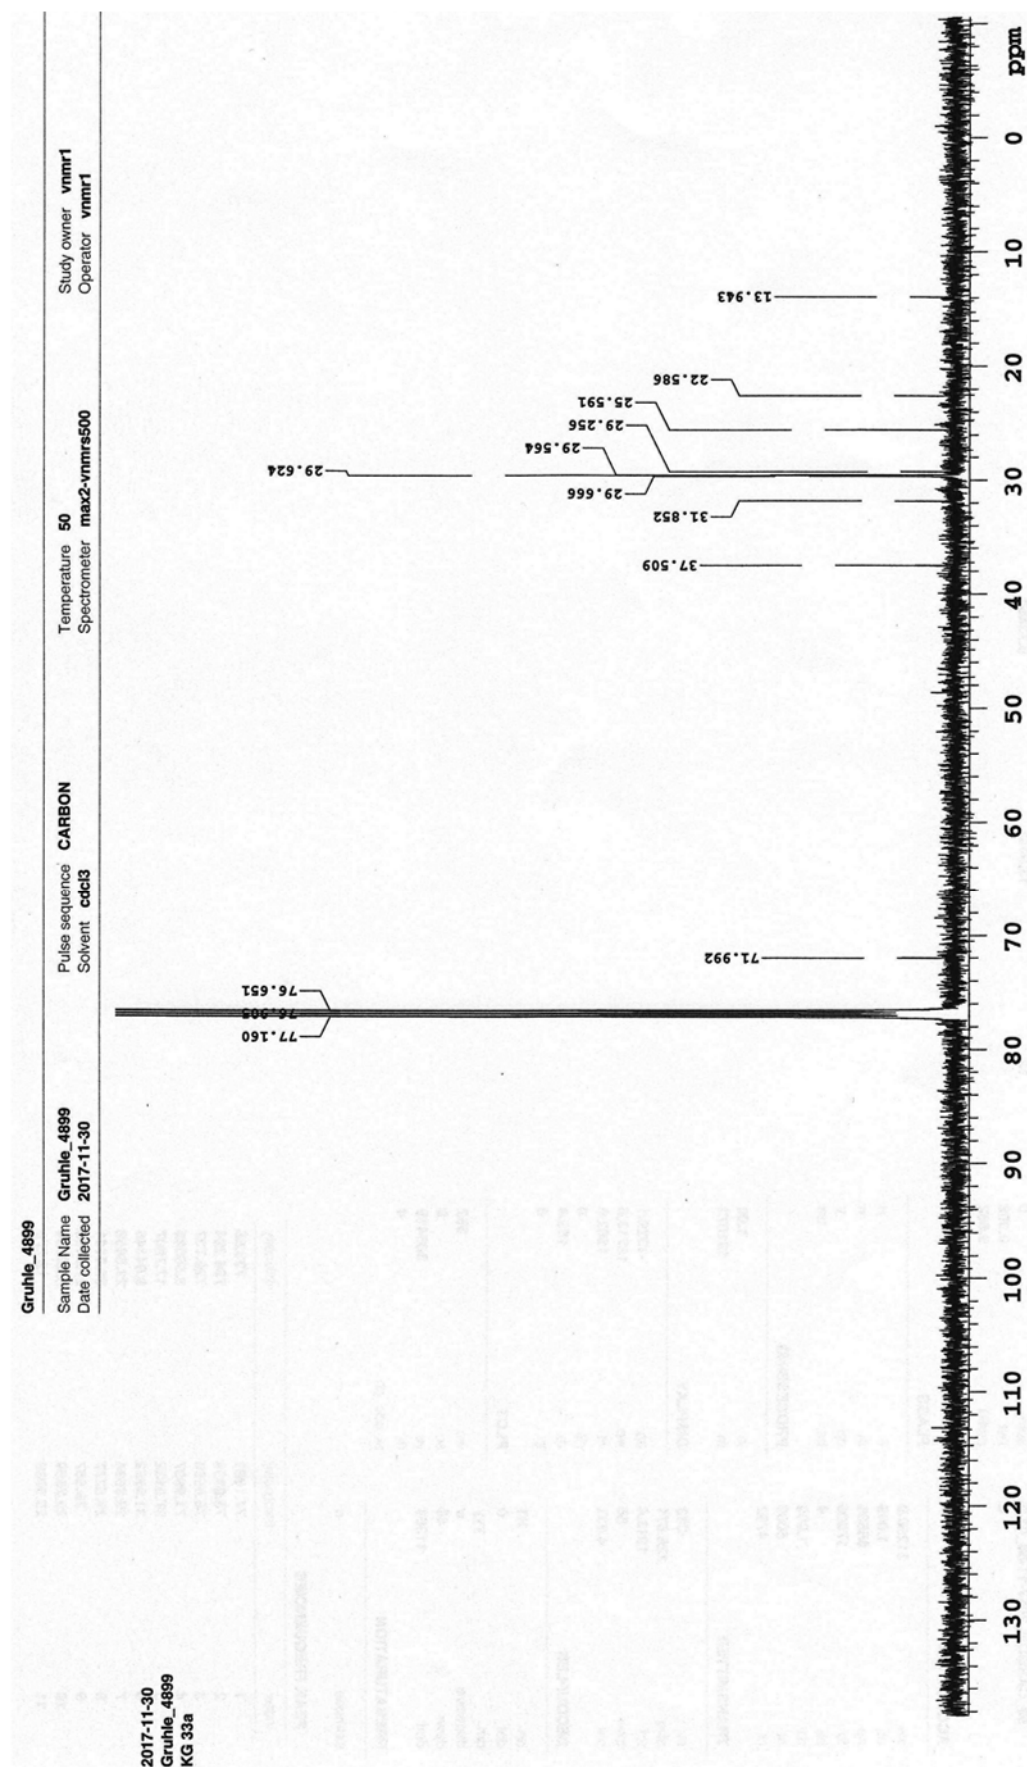

# Organic & Biomolecular Chemistry

Compound **10f** – APCI-MS (positive mode)

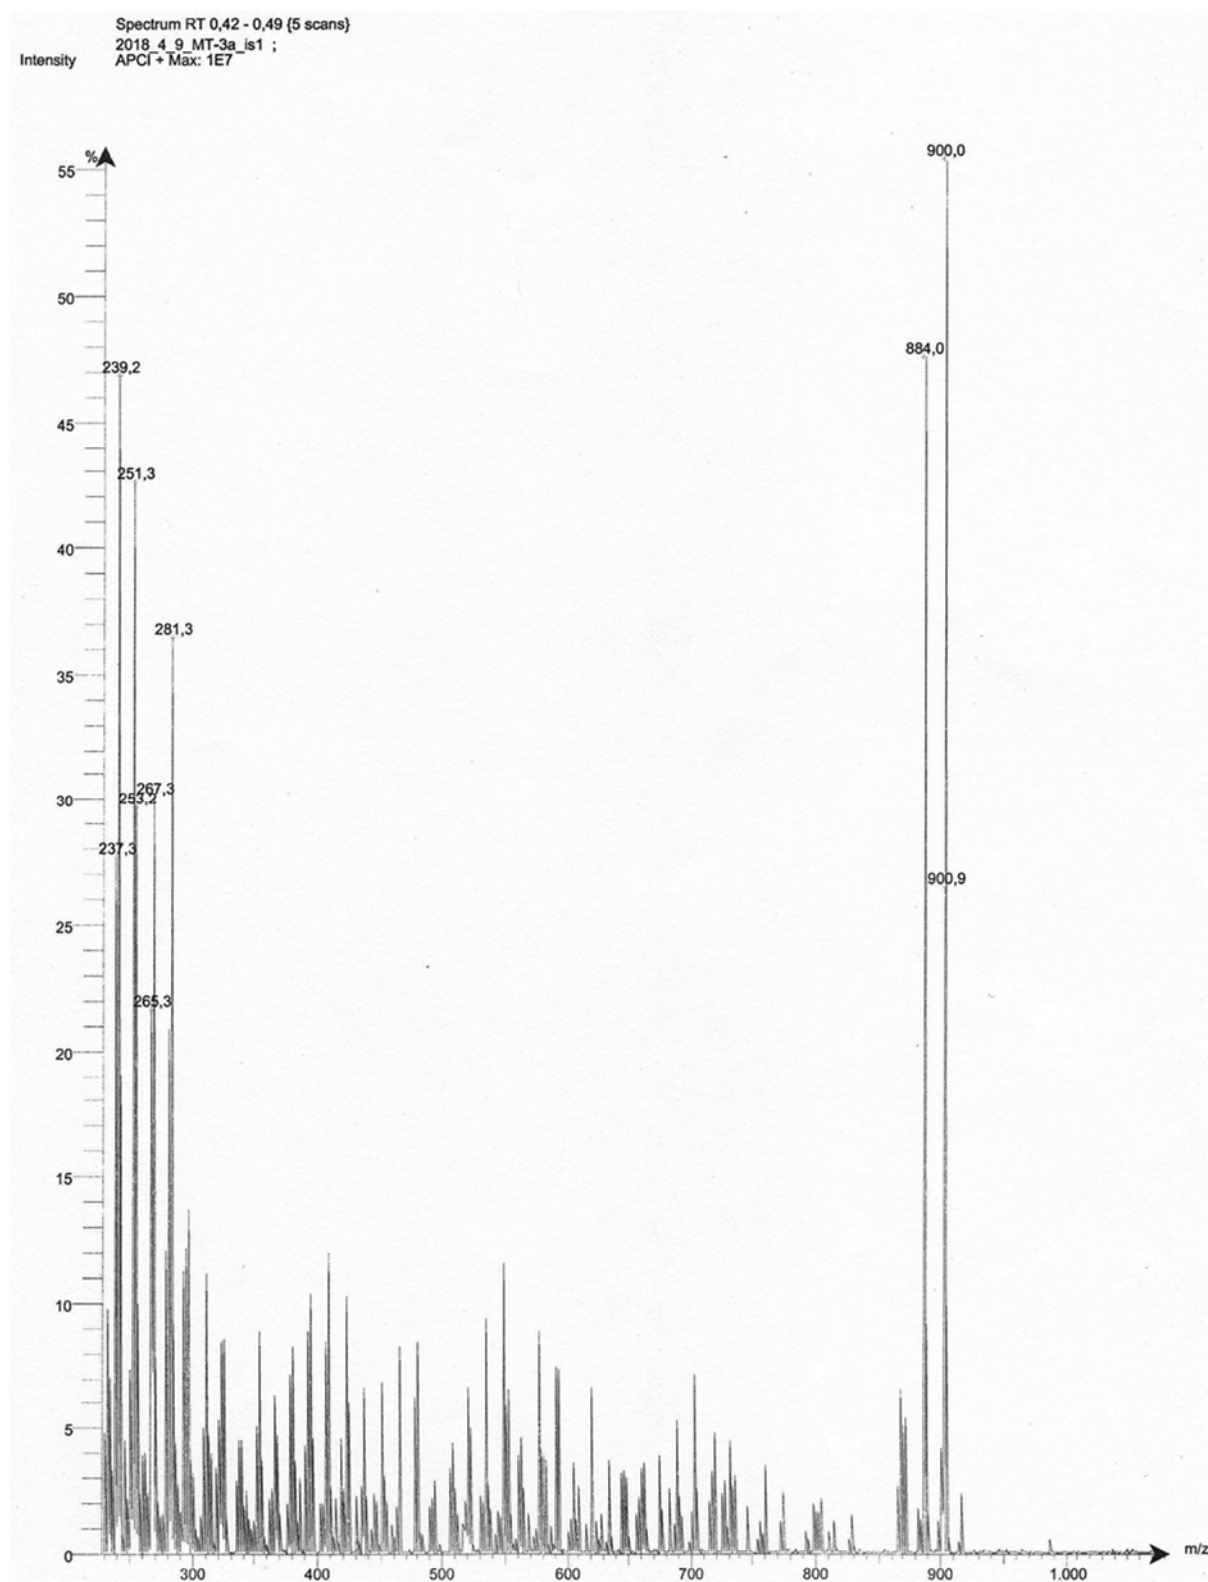

# Organic & Biomolecular Chemistry

## Compound 10f – $^1\text{H}$ NMR

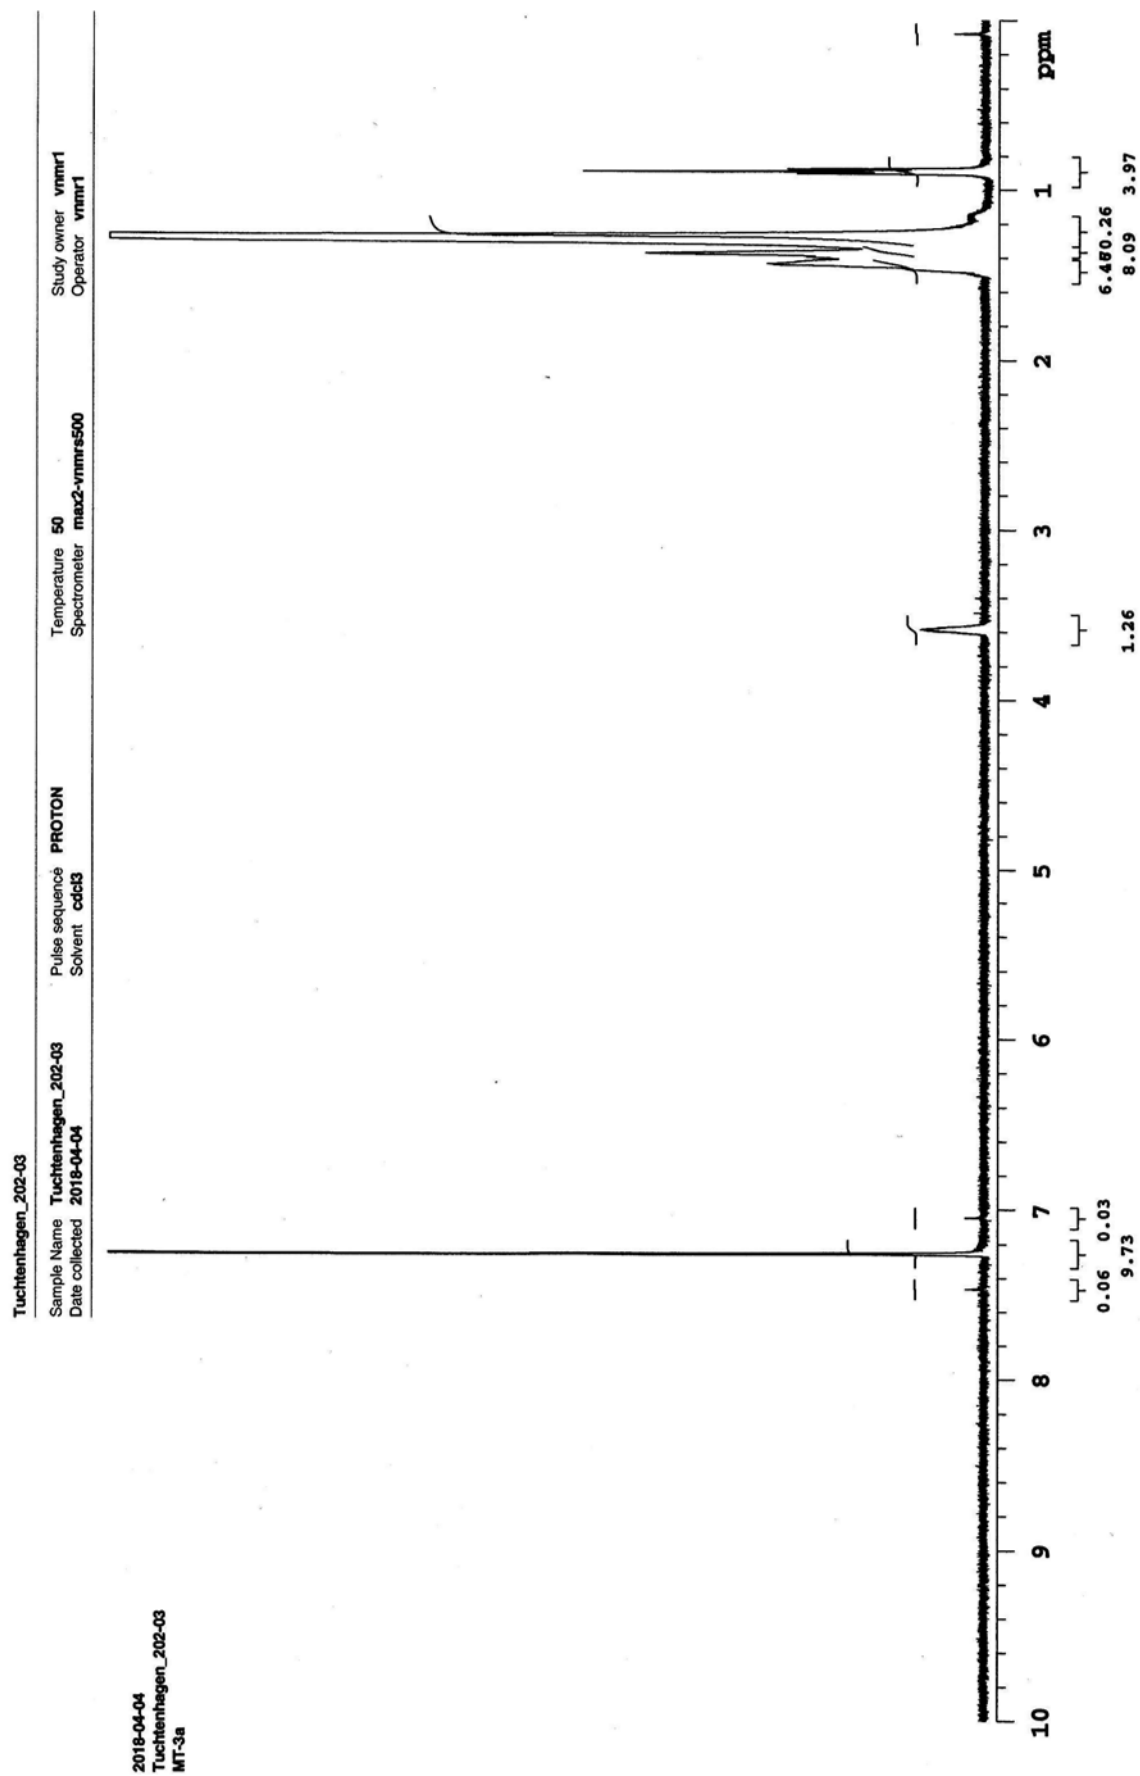

# Organic & Biomolecular Chemistry

Compound 10f –  $^{13}\text{C}$  NMR

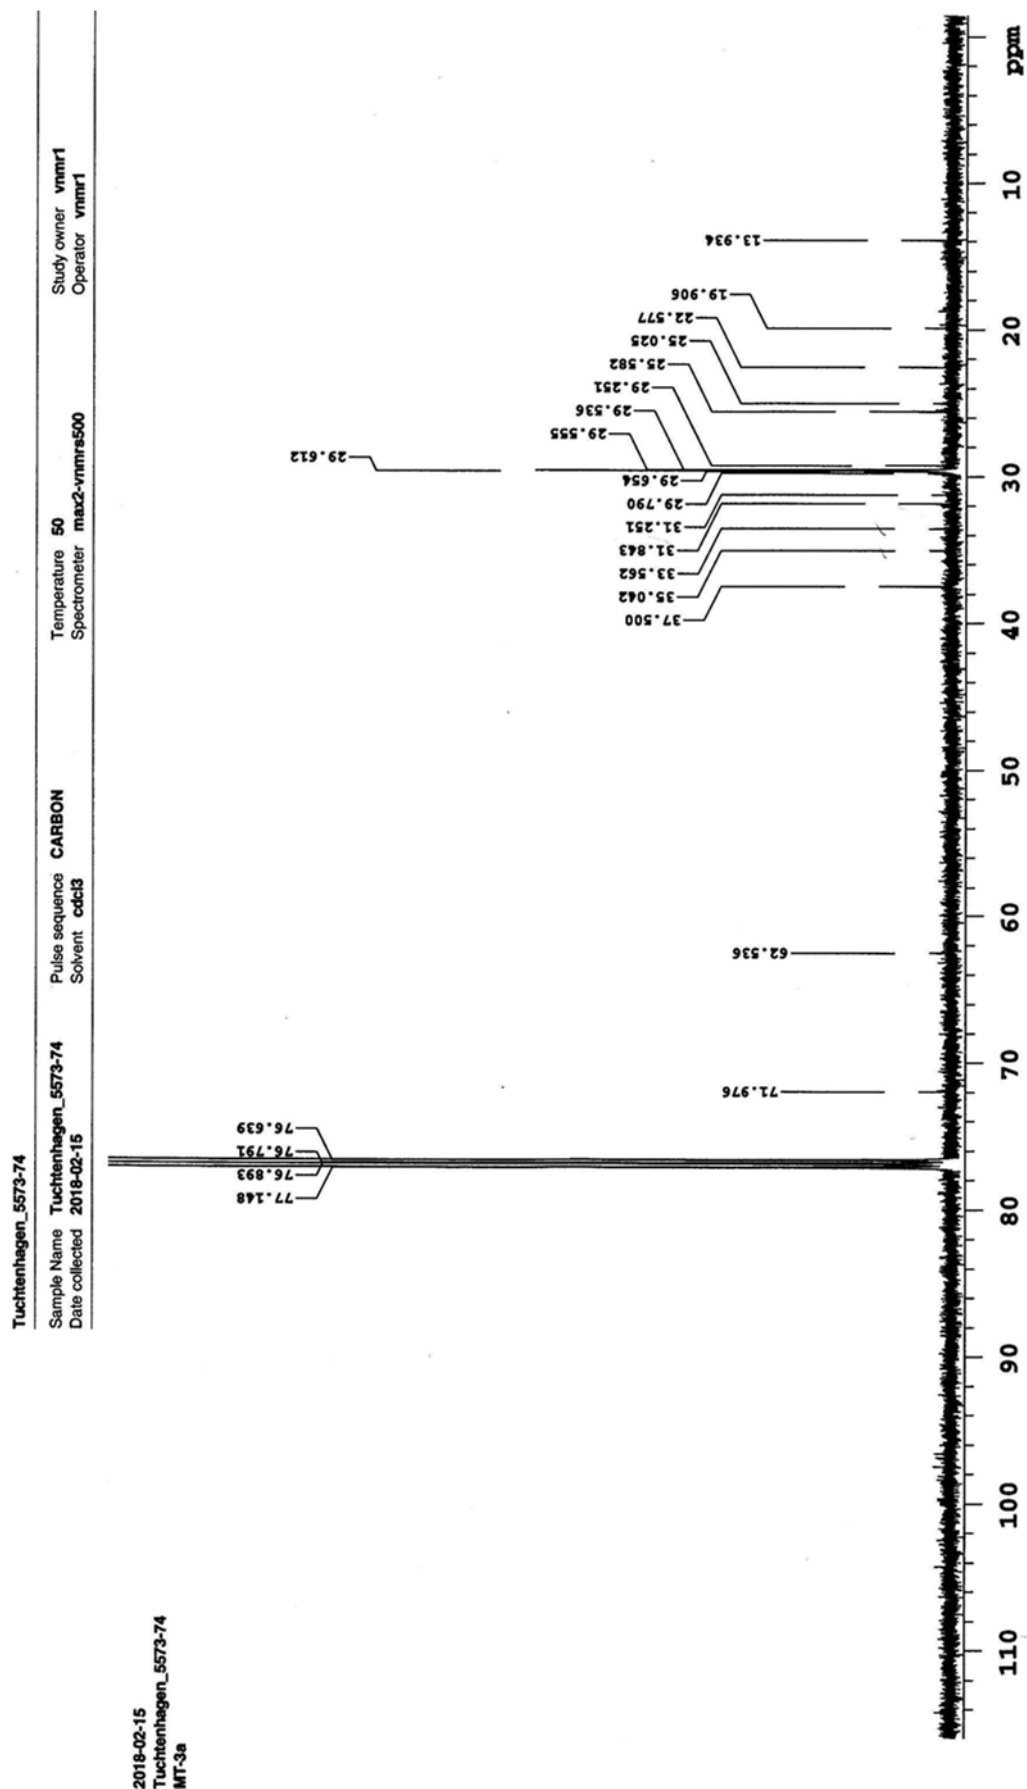

# Organic & Biomolecular Chemistry

## PC-C32(1,32C4)-PC – ESI-MS (positive mode)

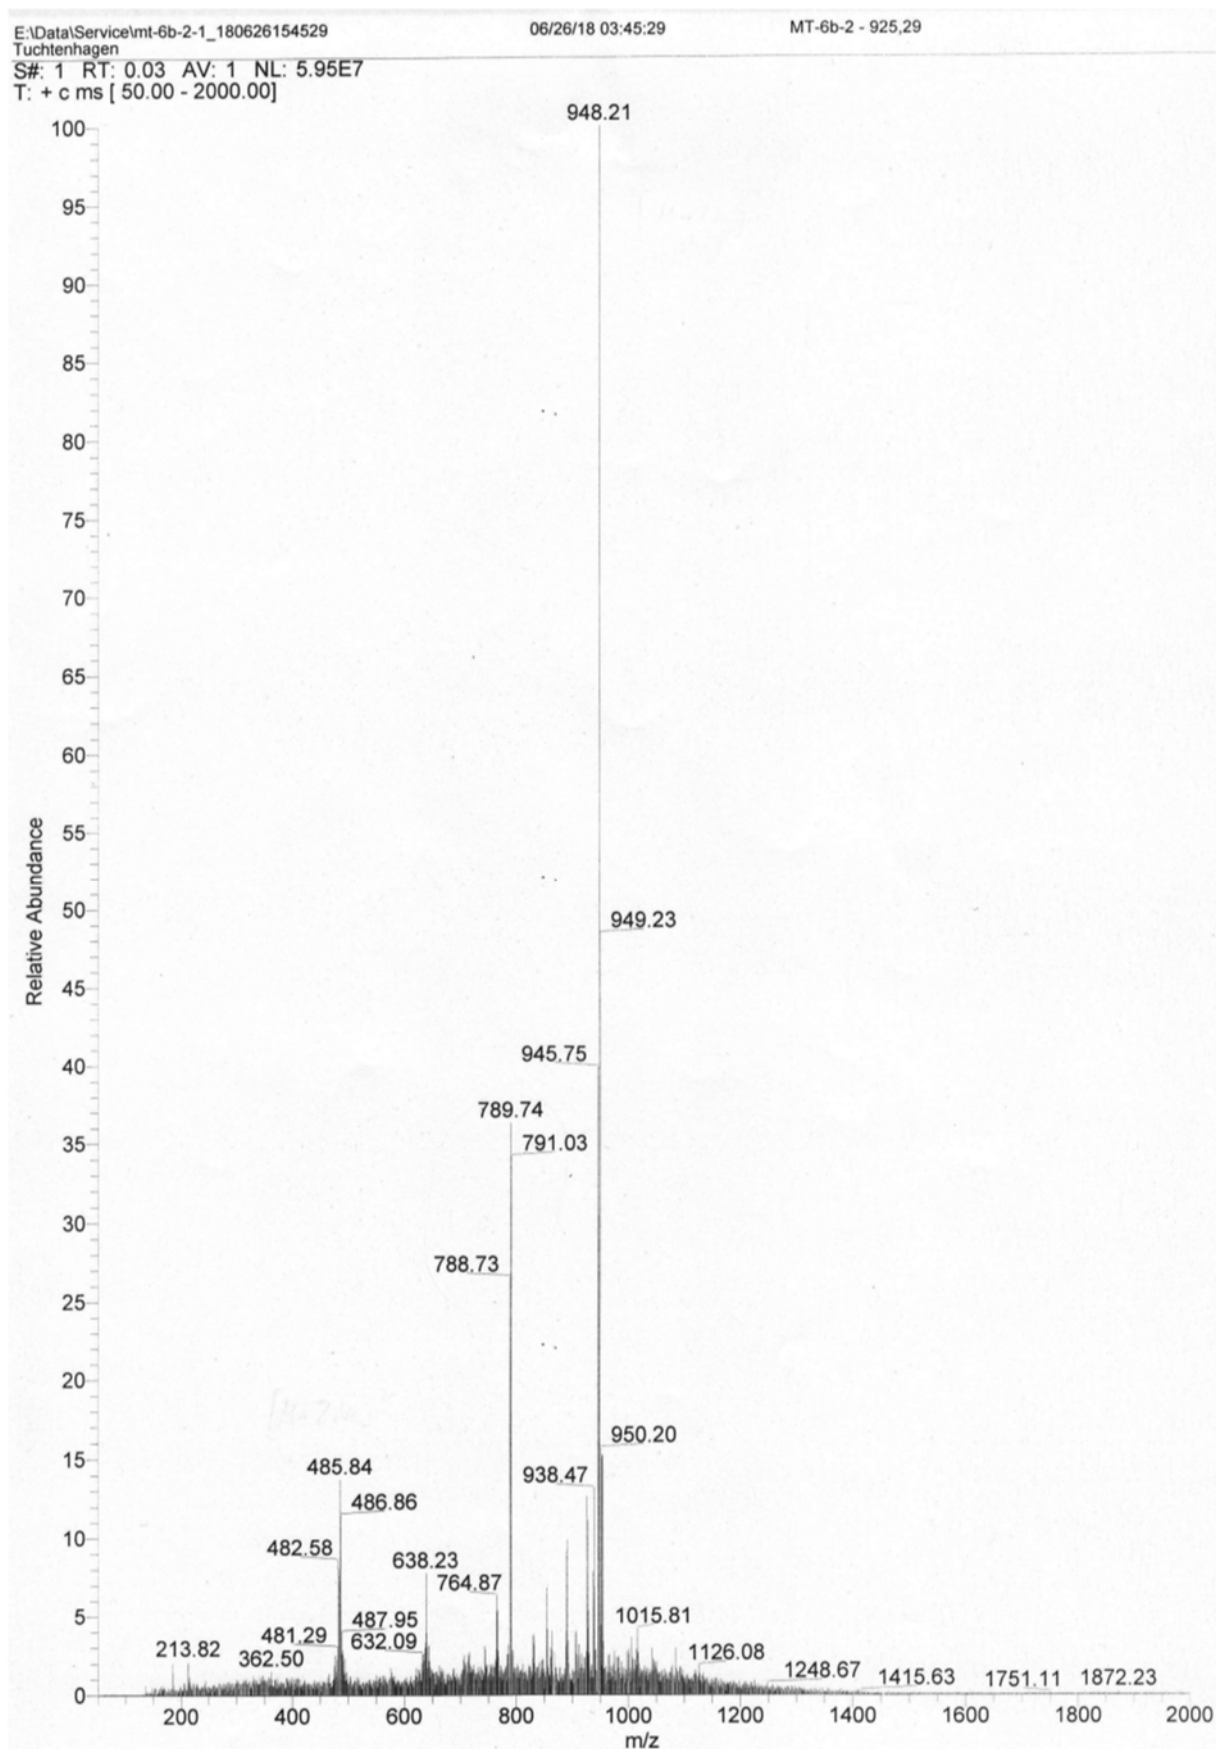

# Organic & Biomolecular Chemistry

## PC-C32(1,32C4)-PC – ESI-MS (negative mode)

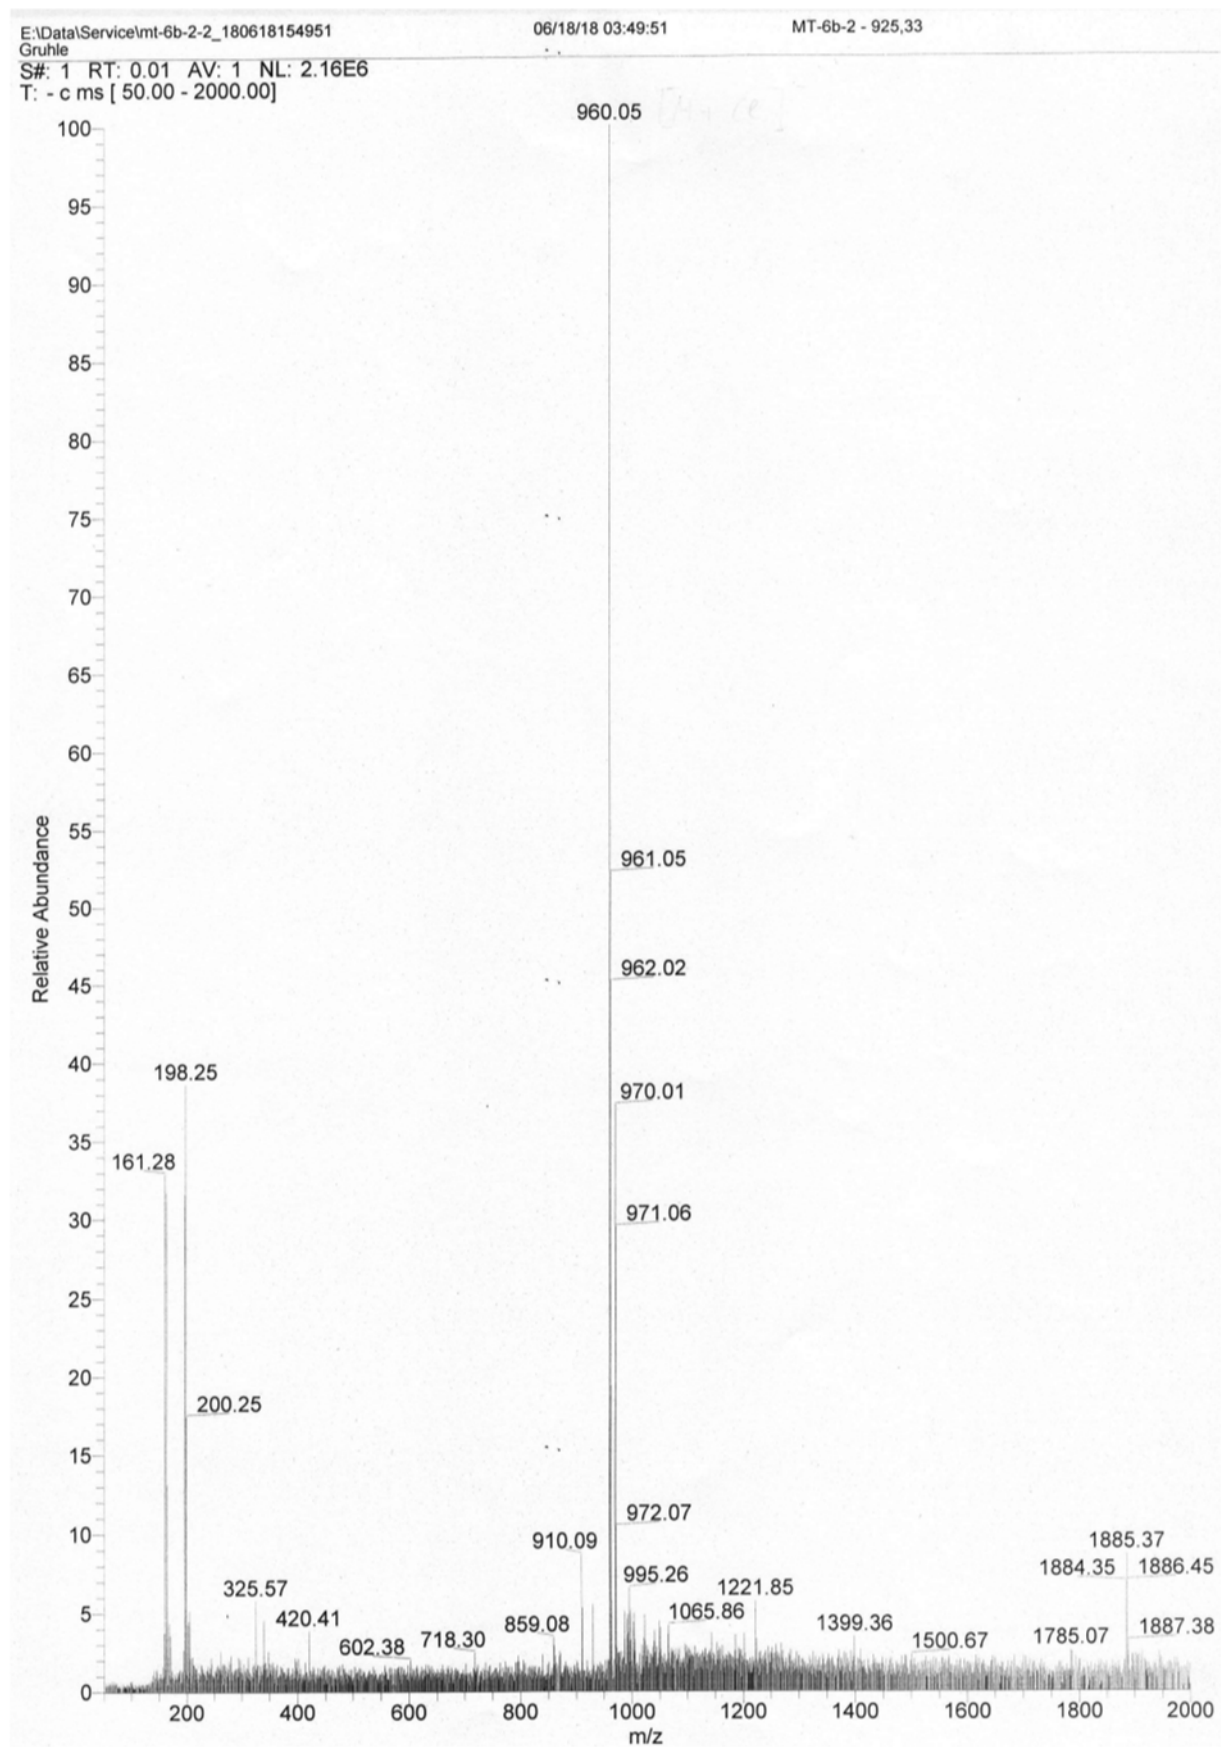

# Organic & Biomolecular Chemistry

## PC-C32(1,32C4)-PC – HRMS (positive mode)

MT\_6b\_2 #3-19 RT: 0.03-0.27 AV: 17 NL: 4.63E8  
T: FTMS + p NSI Full ms [300.00-2000.00]

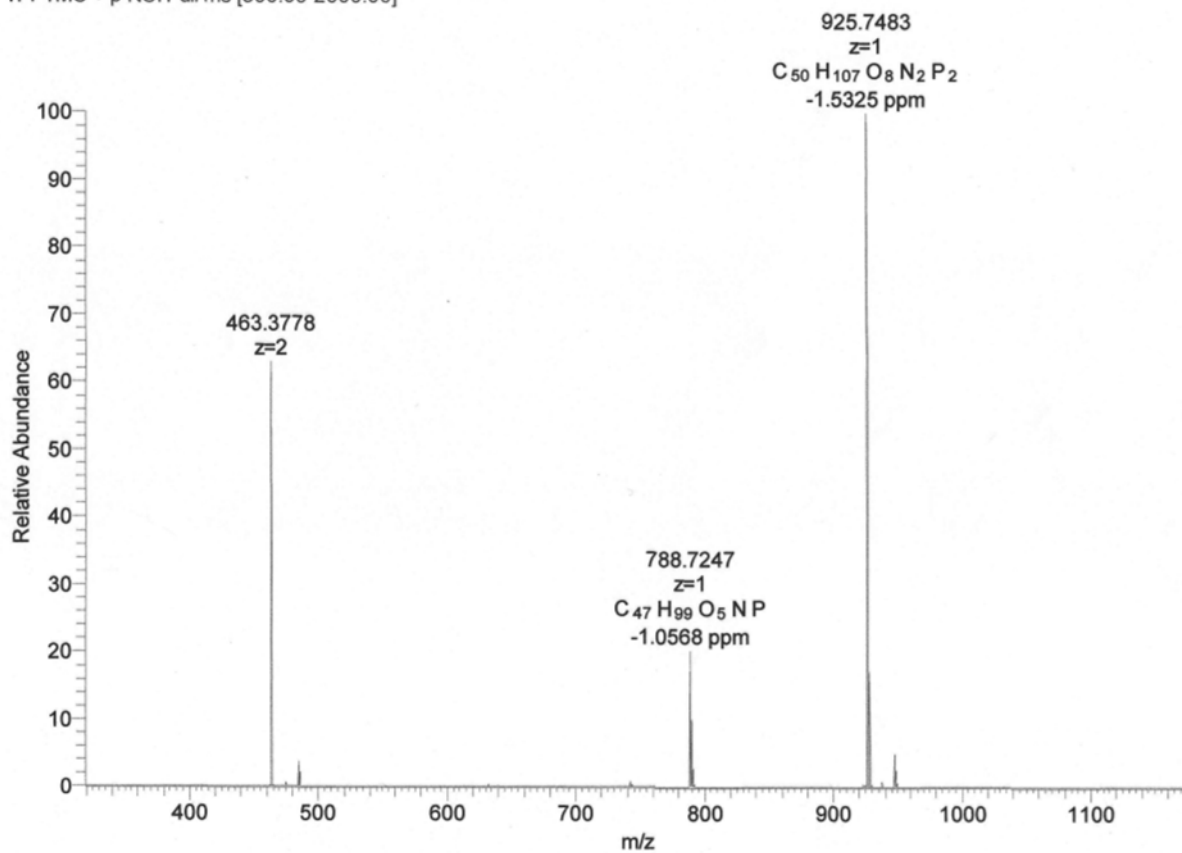



# Organic & Biomolecular Chemistry

PC-C32(1,32C4)-PC –  $^1\text{H}$  NMR

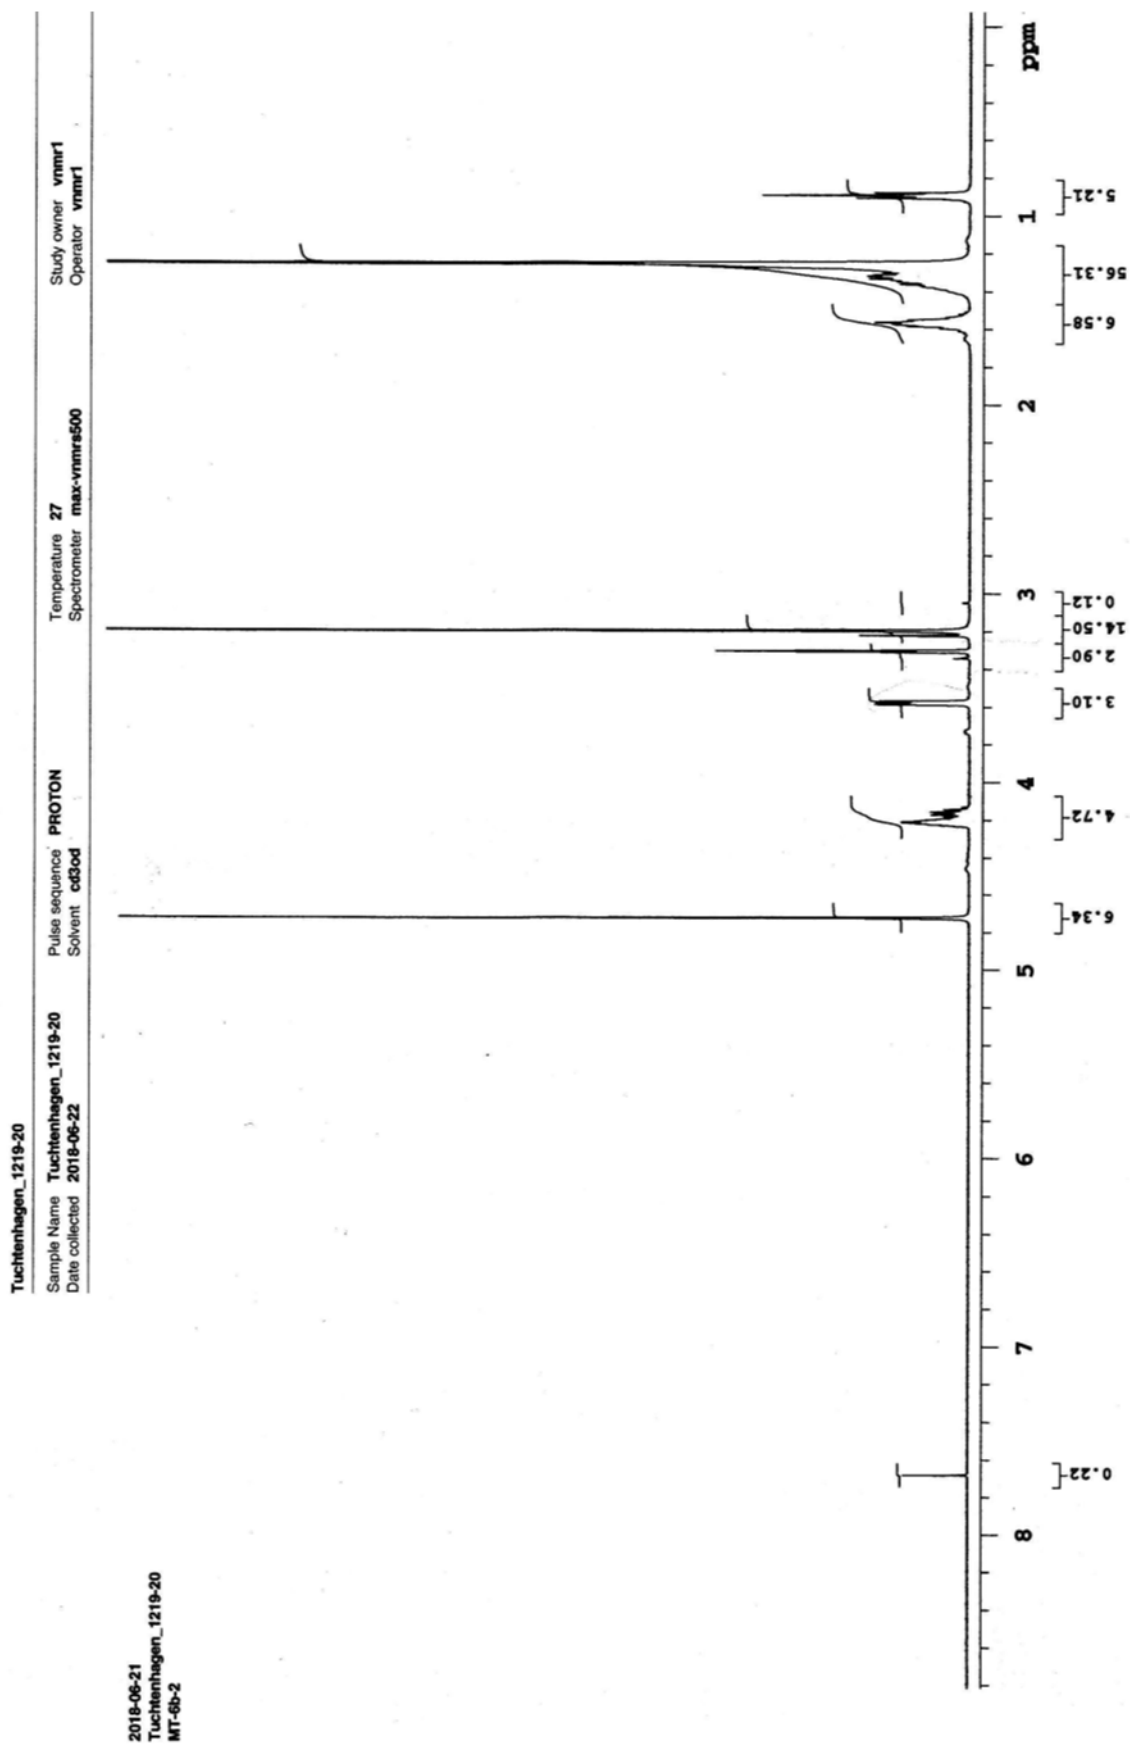

# Organic & Biomolecular Chemistry

## PC-C32(1,32C4)-PC – $^{13}\text{C}$ NMR

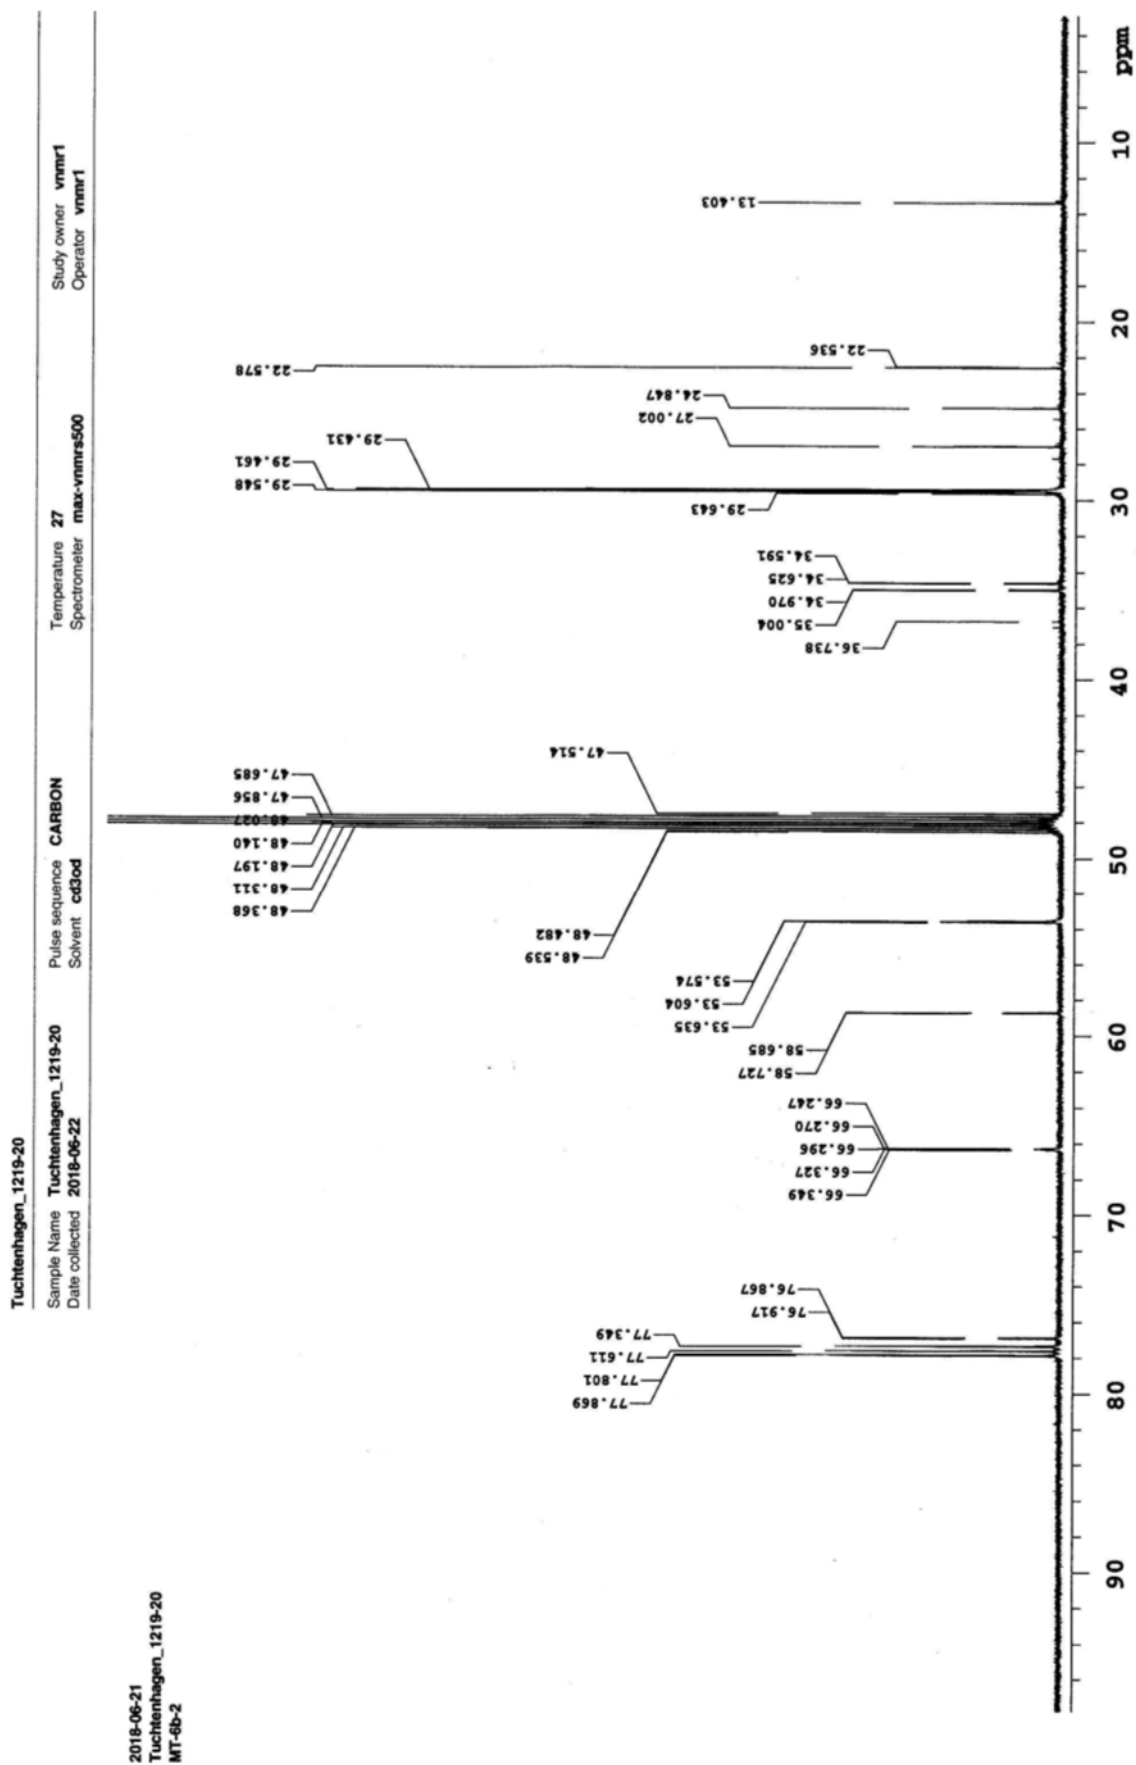

# Organic & Biomolecular Chemistry

## PC-C32(1,32C5)-PC – ESI-MS (positive mode)

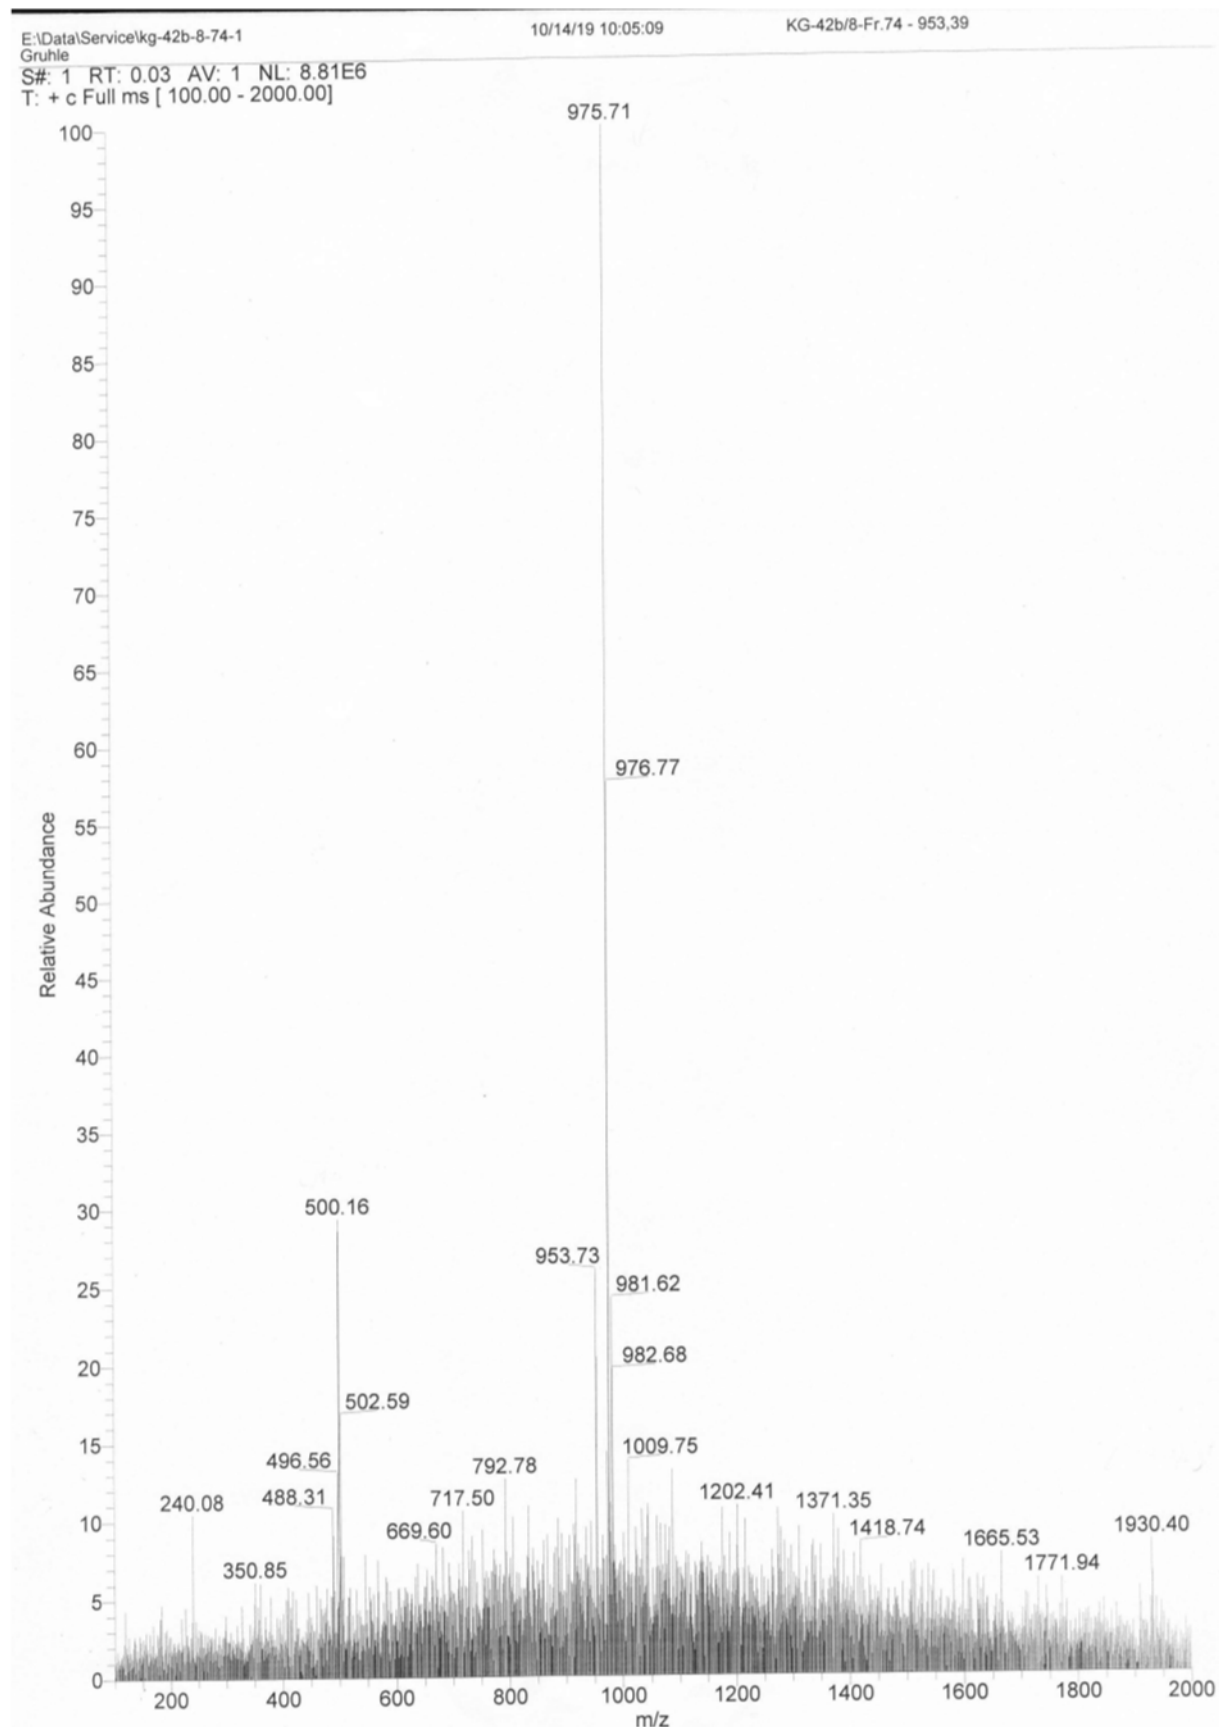

# Organic & Biomolecular Chemistry

## PC-C32(1,32C5)-PC – HRMS (positive mode)

KG-42b-2 #2-15 RT: 0.03-0.40 AV: 14 NL: 2.72E7  
F: FTMS + p NSI Full ms

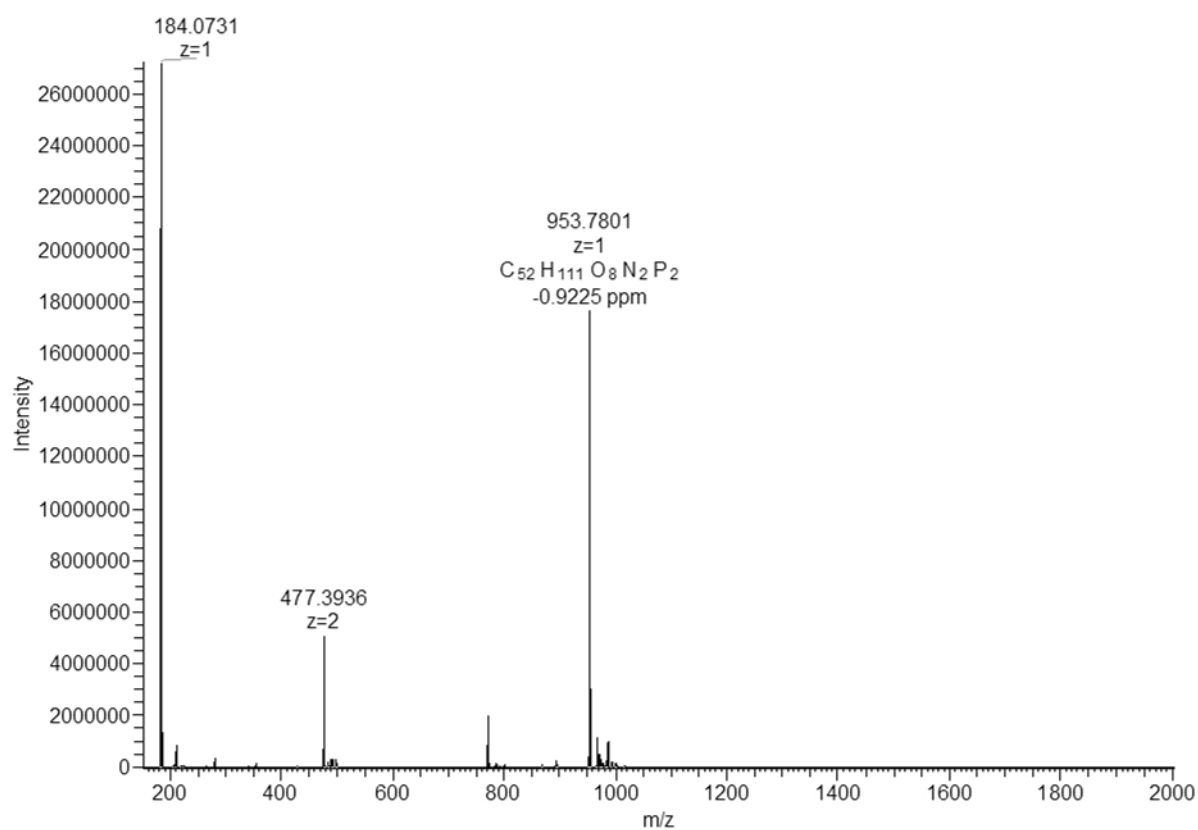

# Organic & Biomolecular Chemistry

PC-C32(1,32C5)-PC -  $^1\text{H}$  NMR

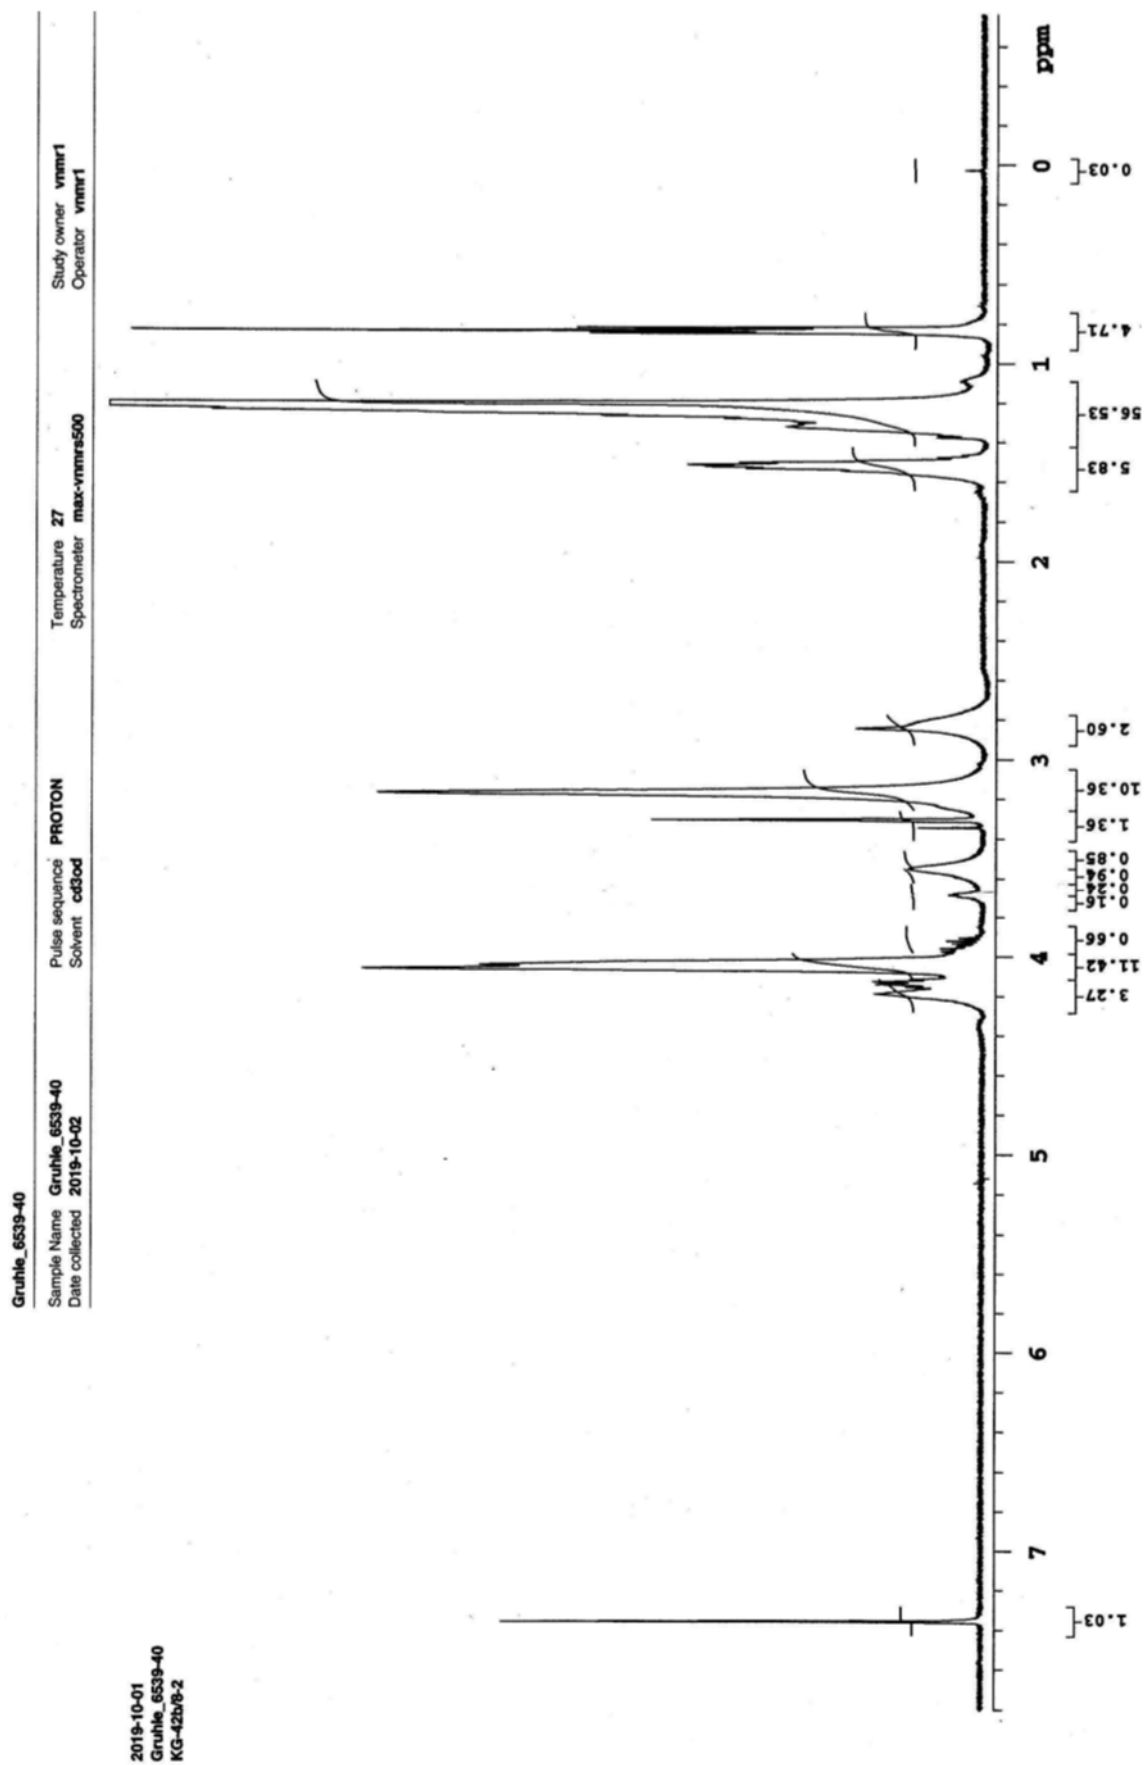

# Organic & Biomolecular Chemistry

PC-C32(1,32C5)-PC –  $^{13}\text{C}$  NMR

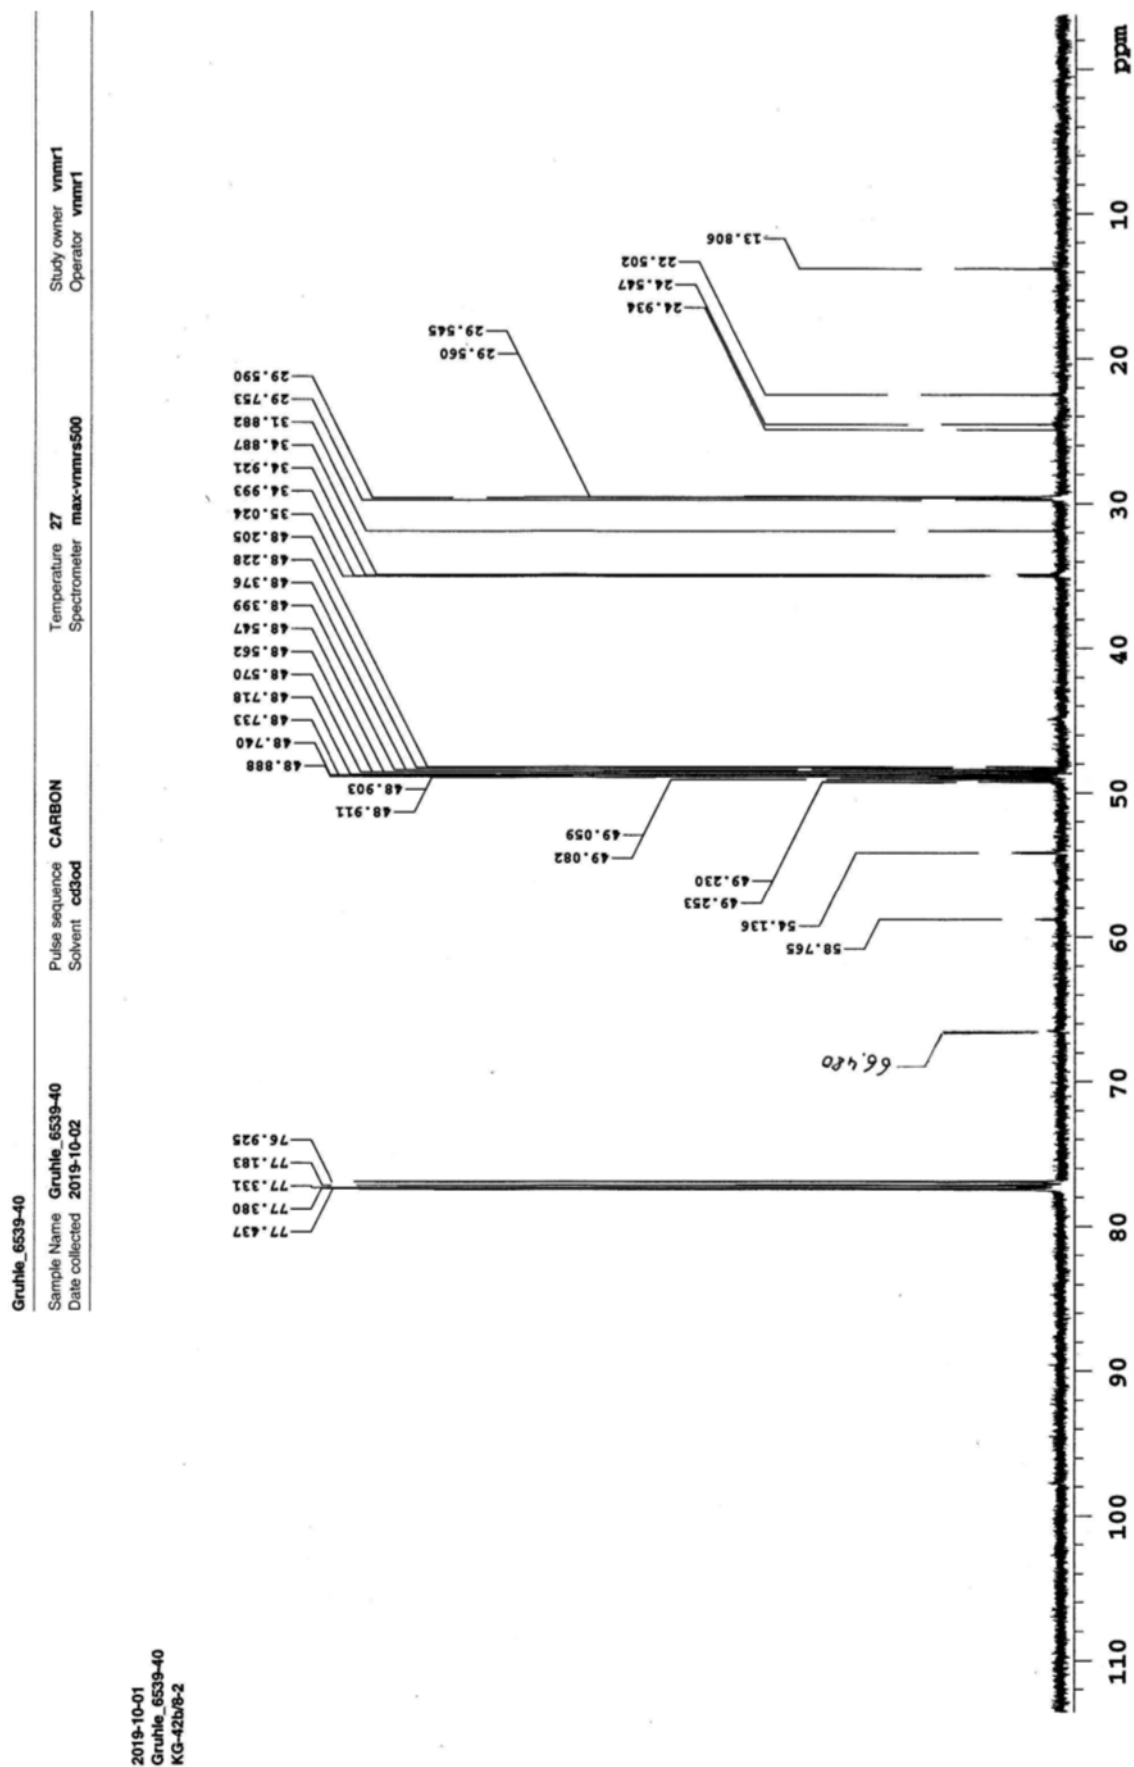

2019-10-01  
Grubha\_6539-40  
KG-42b/6-2

# Organic & Biomolecular Chemistry

## PC-C32(1,32C7)-PC – ESI-MS (positive mode)

Kai\_41b\_1009\_190409144413 #66-75 RT: 0.29-0.55 AV: 10 NL: 3.76E7  
T: FTMS + p NSI Full ms [70.00-1500.00]

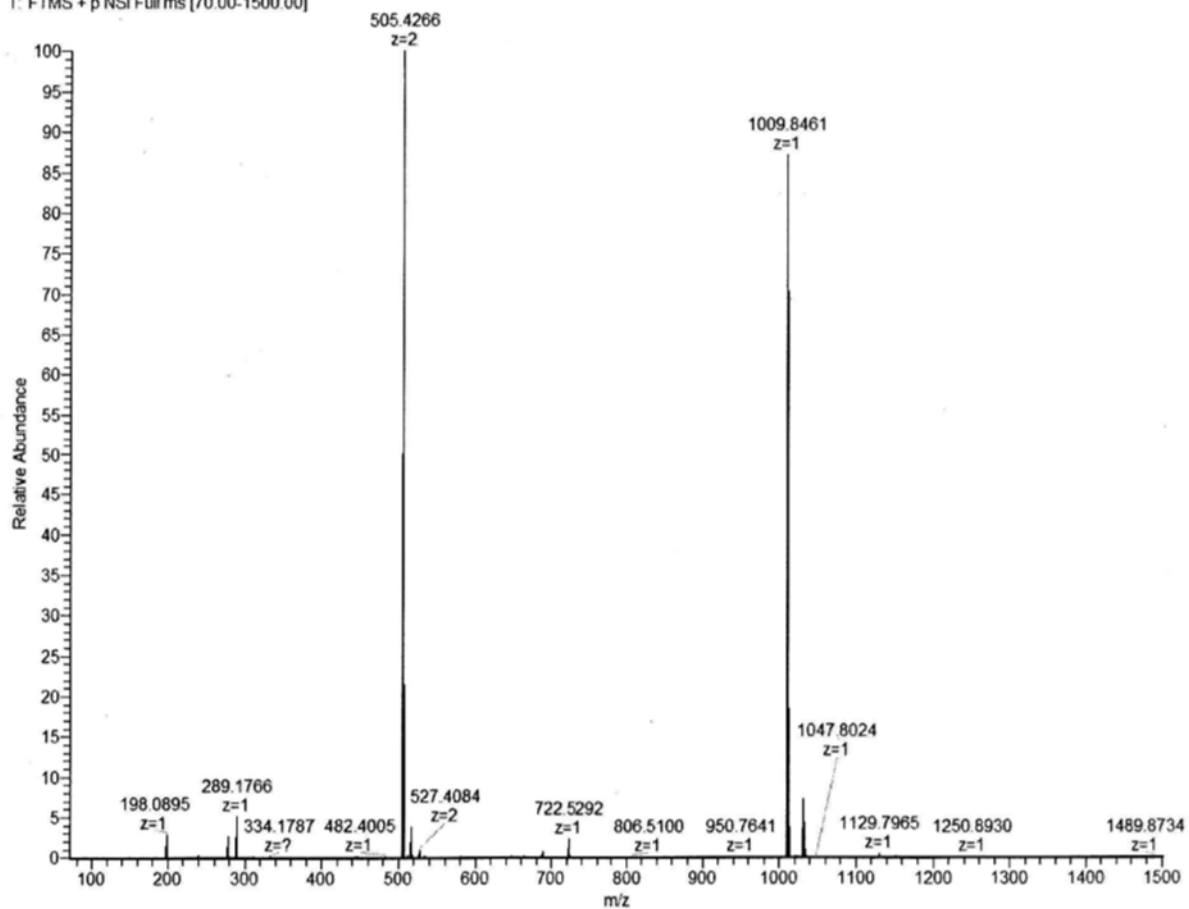

# Organic & Biomolecular Chemistry

## PC-C32(1,32C7)-PC – HRMS (positive mode)

KG-41b-3 #2-15 RT: 0.03-0.42 AV: 14 NL: 1.06E8  
F: FTMS + p NSI Full ms

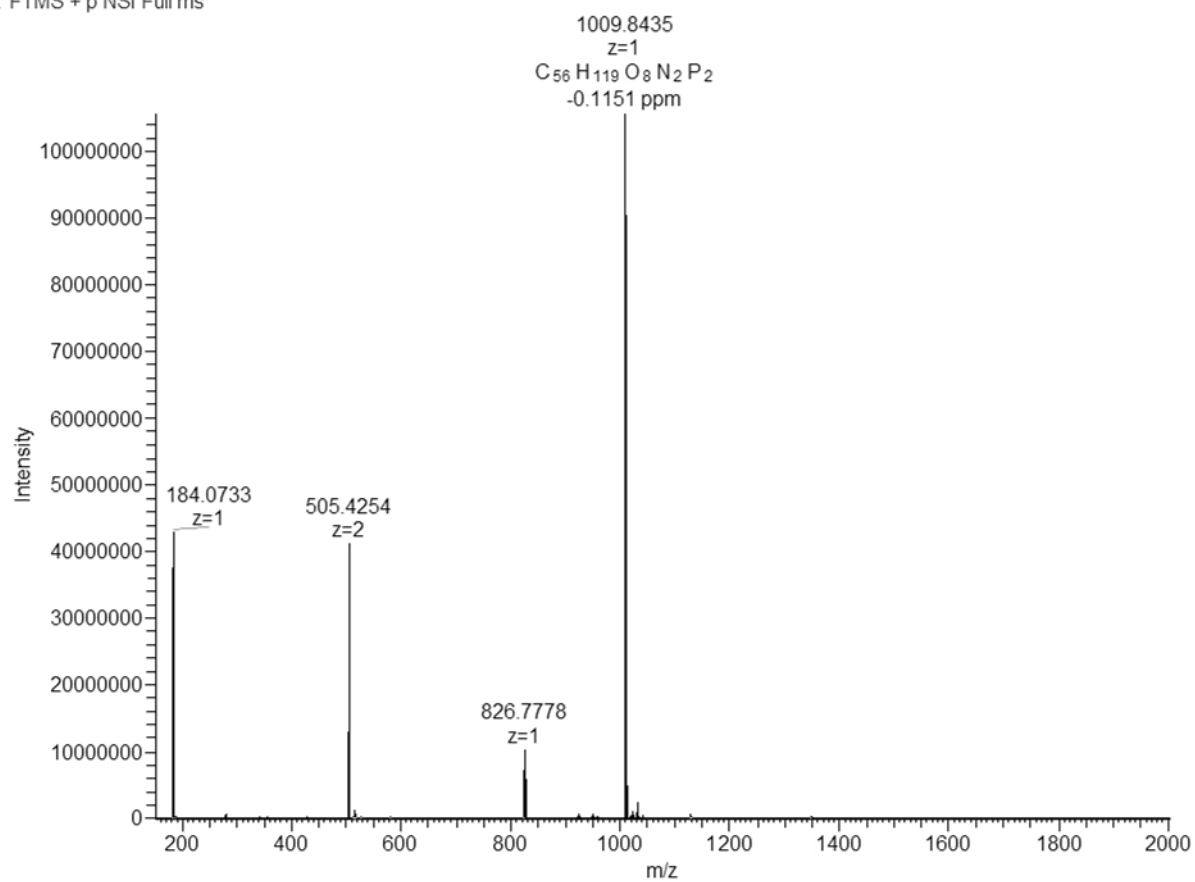



# Organic & Biomolecular Chemistry

PC-C32(1,32C7)-PC –  $^1\text{H}$  NMR

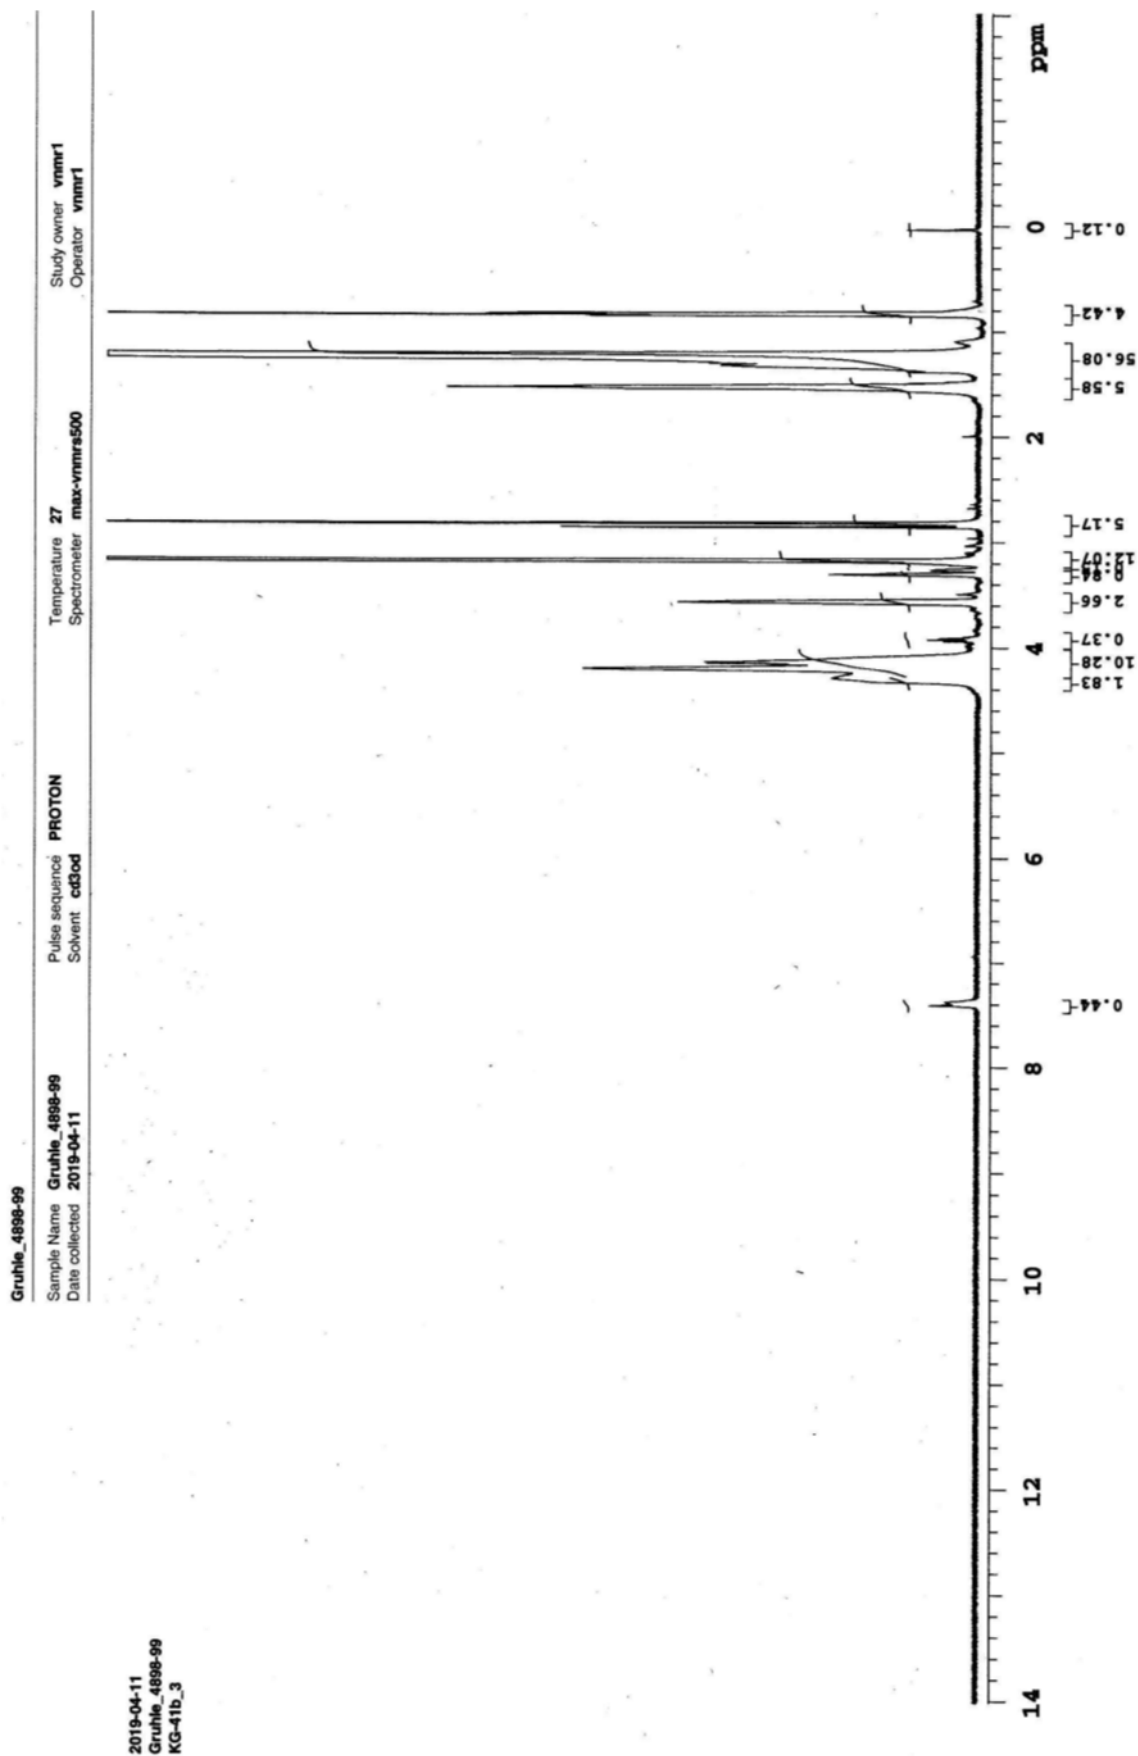

# Organic & Biomolecular Chemistry

## PC-C32(1,32C7)-PC - $^{13}\text{C}$ NMR

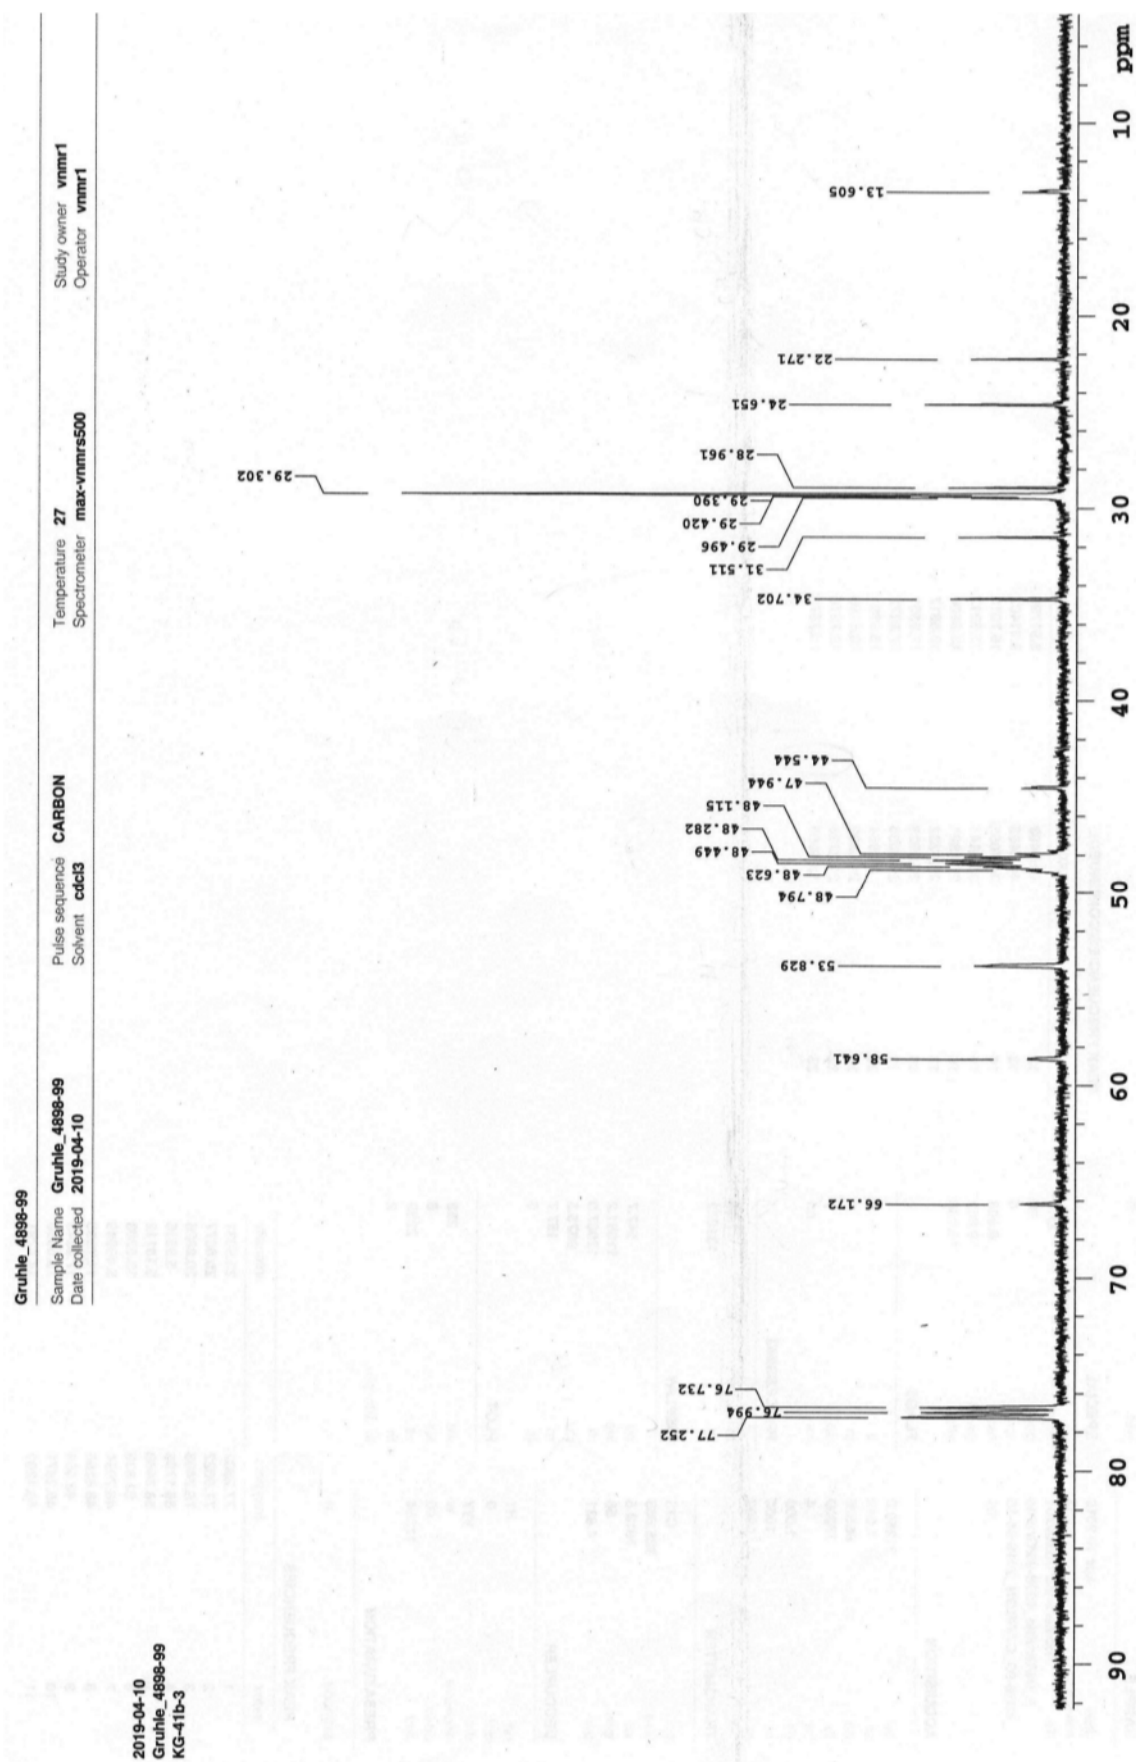

# Organic & Biomolecular Chemistry

*PC-C32(1,32C8)-PC – ESI-MS (positive mode)*

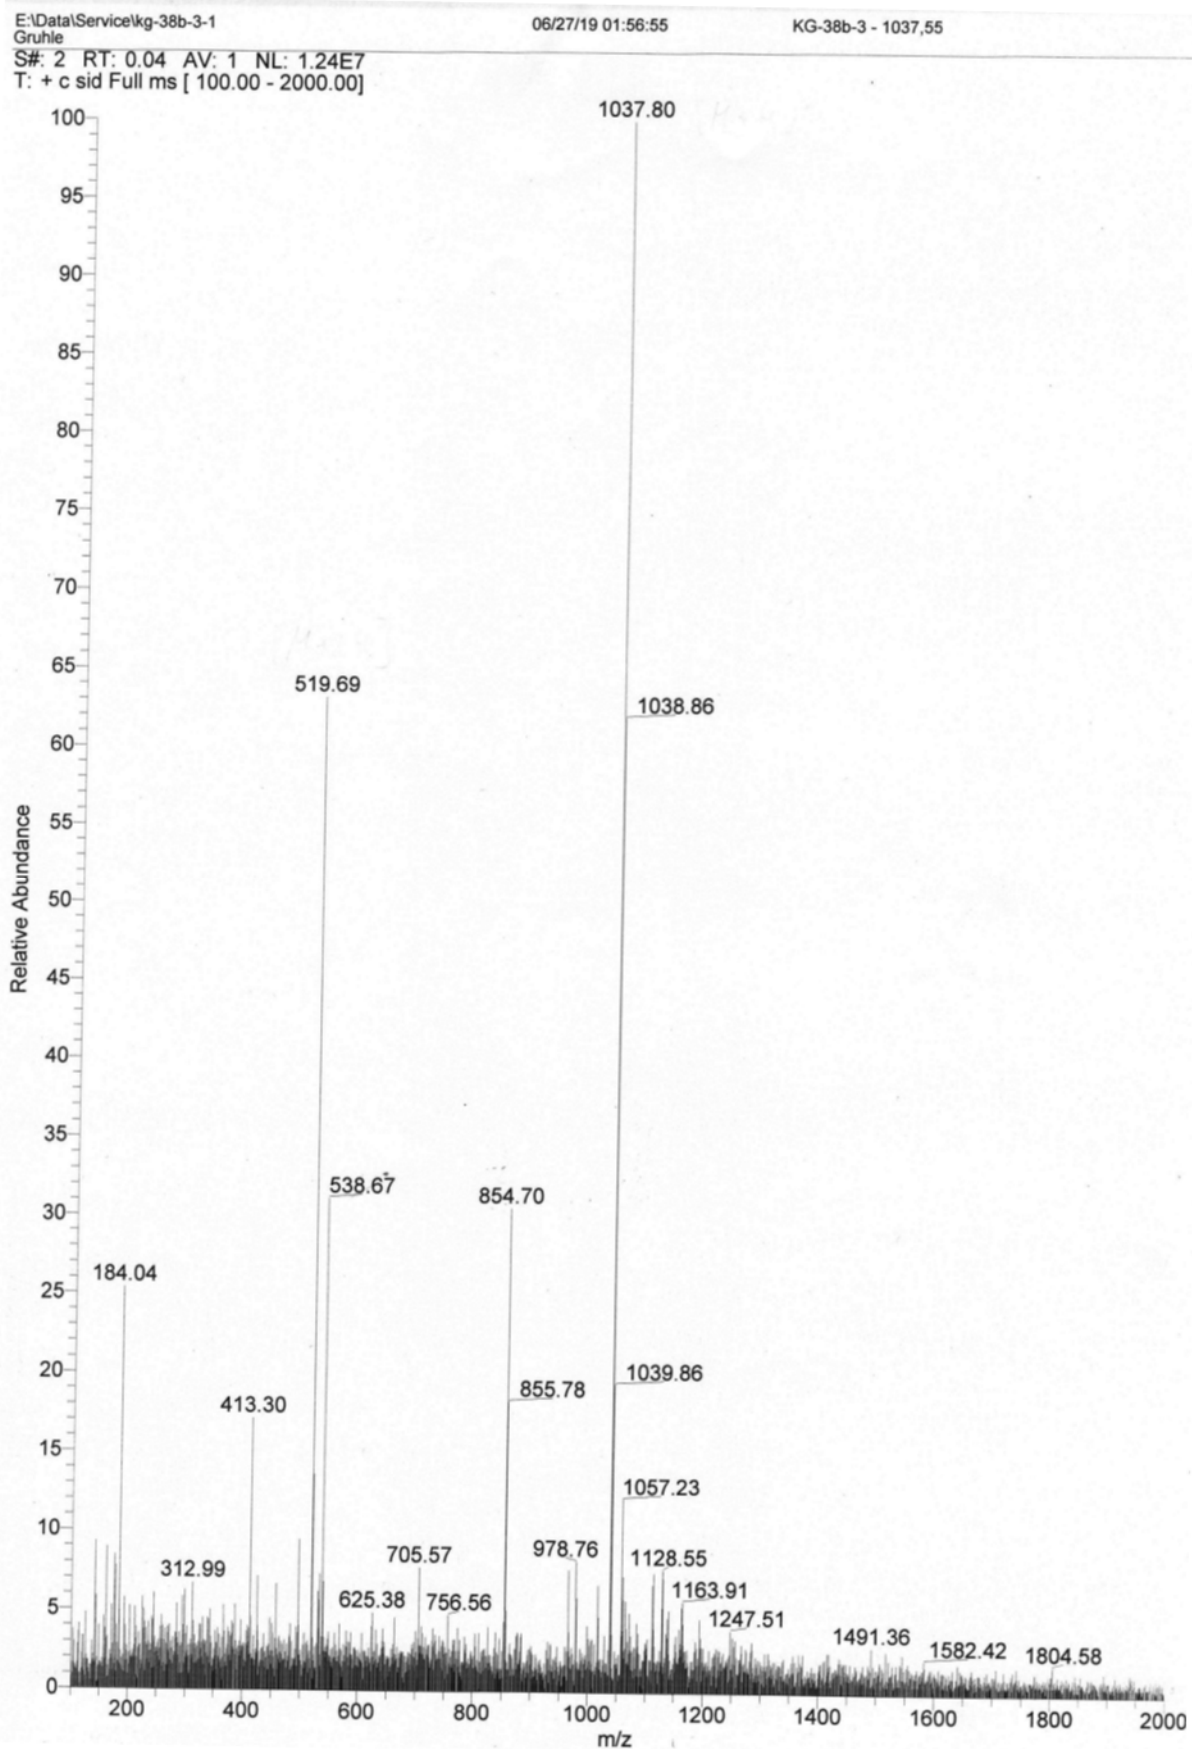

# Organic & Biomolecular Chemistry

PC-C32(1,32C8)-PC – ESI-MS (negative mode)

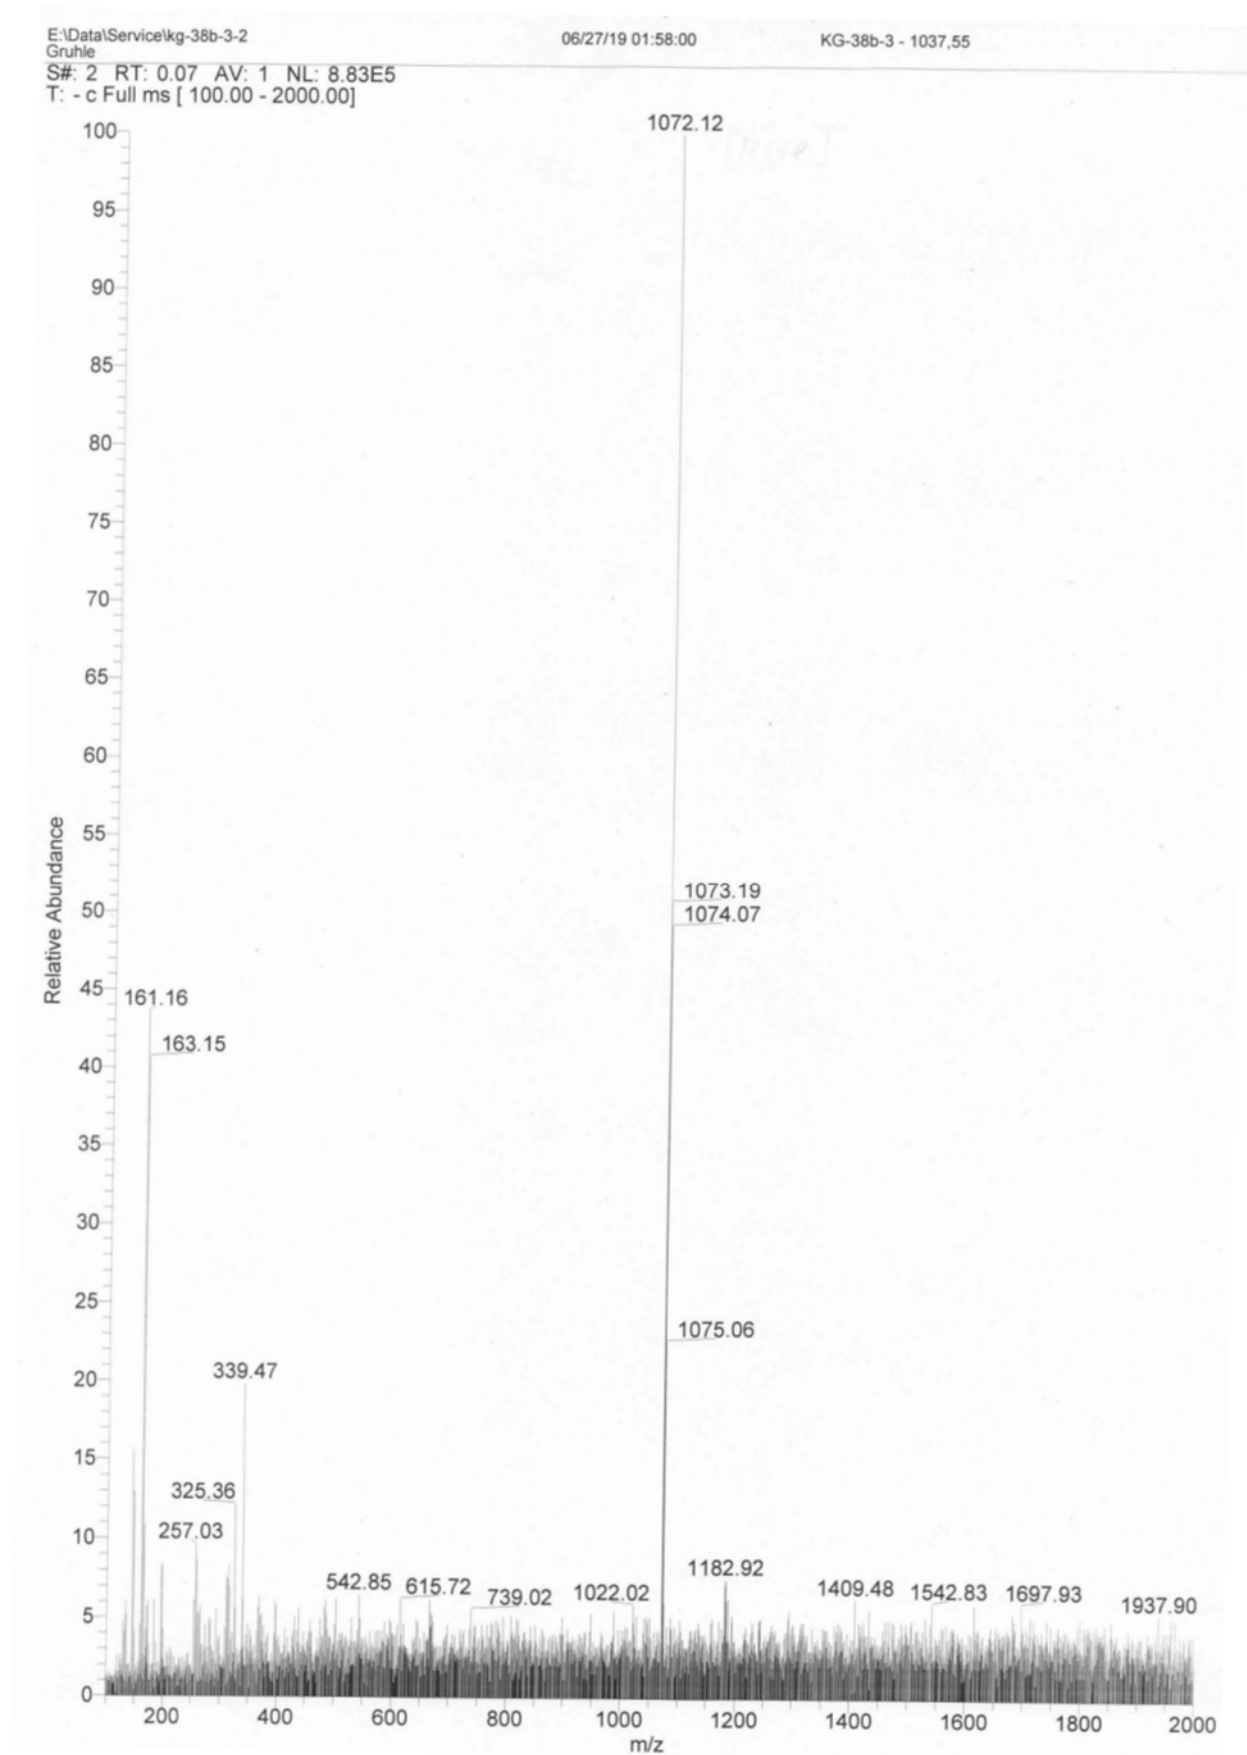

# Organic & Biomolecular Chemistry

## PC-C32(1,32C8)-PC – HRMS (positive mode)

KG-38b-3 #2-15 RT: 0.04-0.41 AV: 14 NL: 4.96E8  
F: FTMS + p NSI Full ms

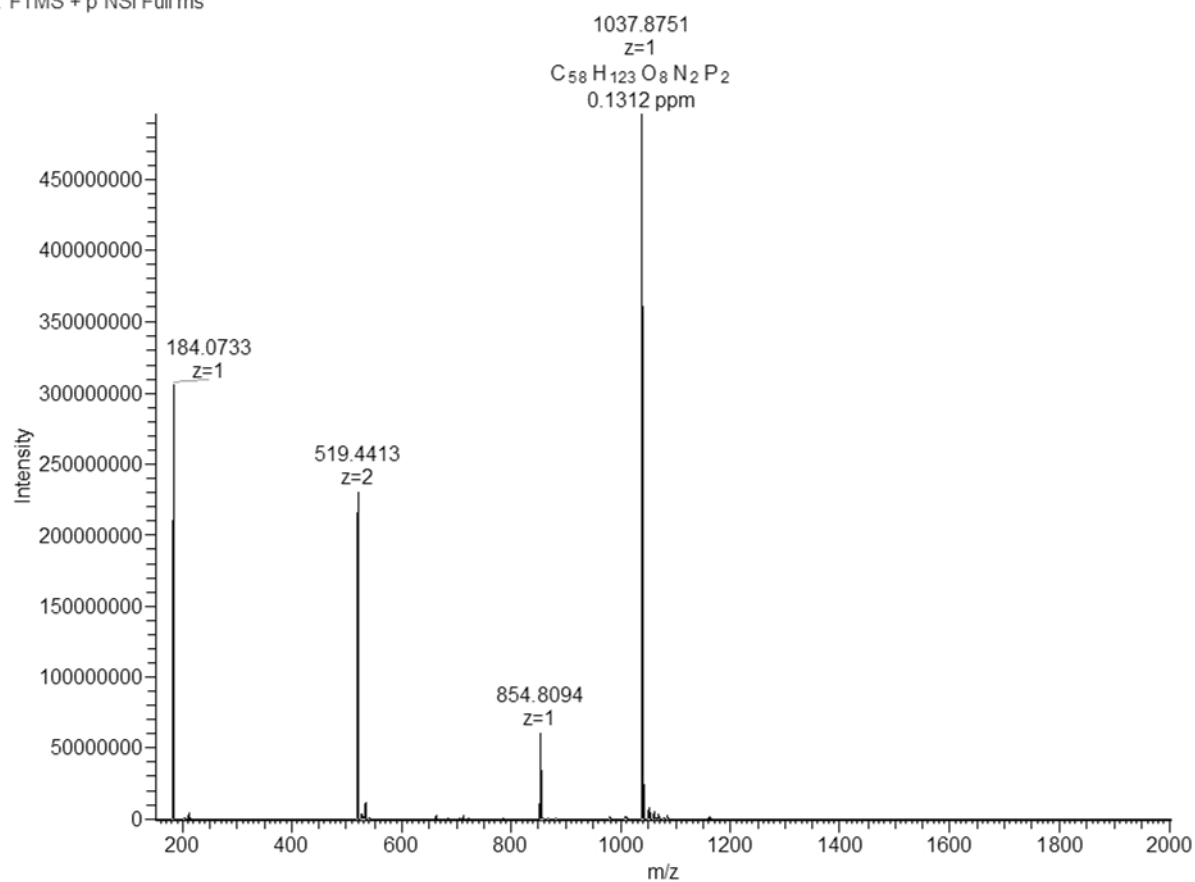

# Organic & Biomolecular Chemistry

PC-C32(1,32C8)-PC –  $^1\text{H}$  NMR

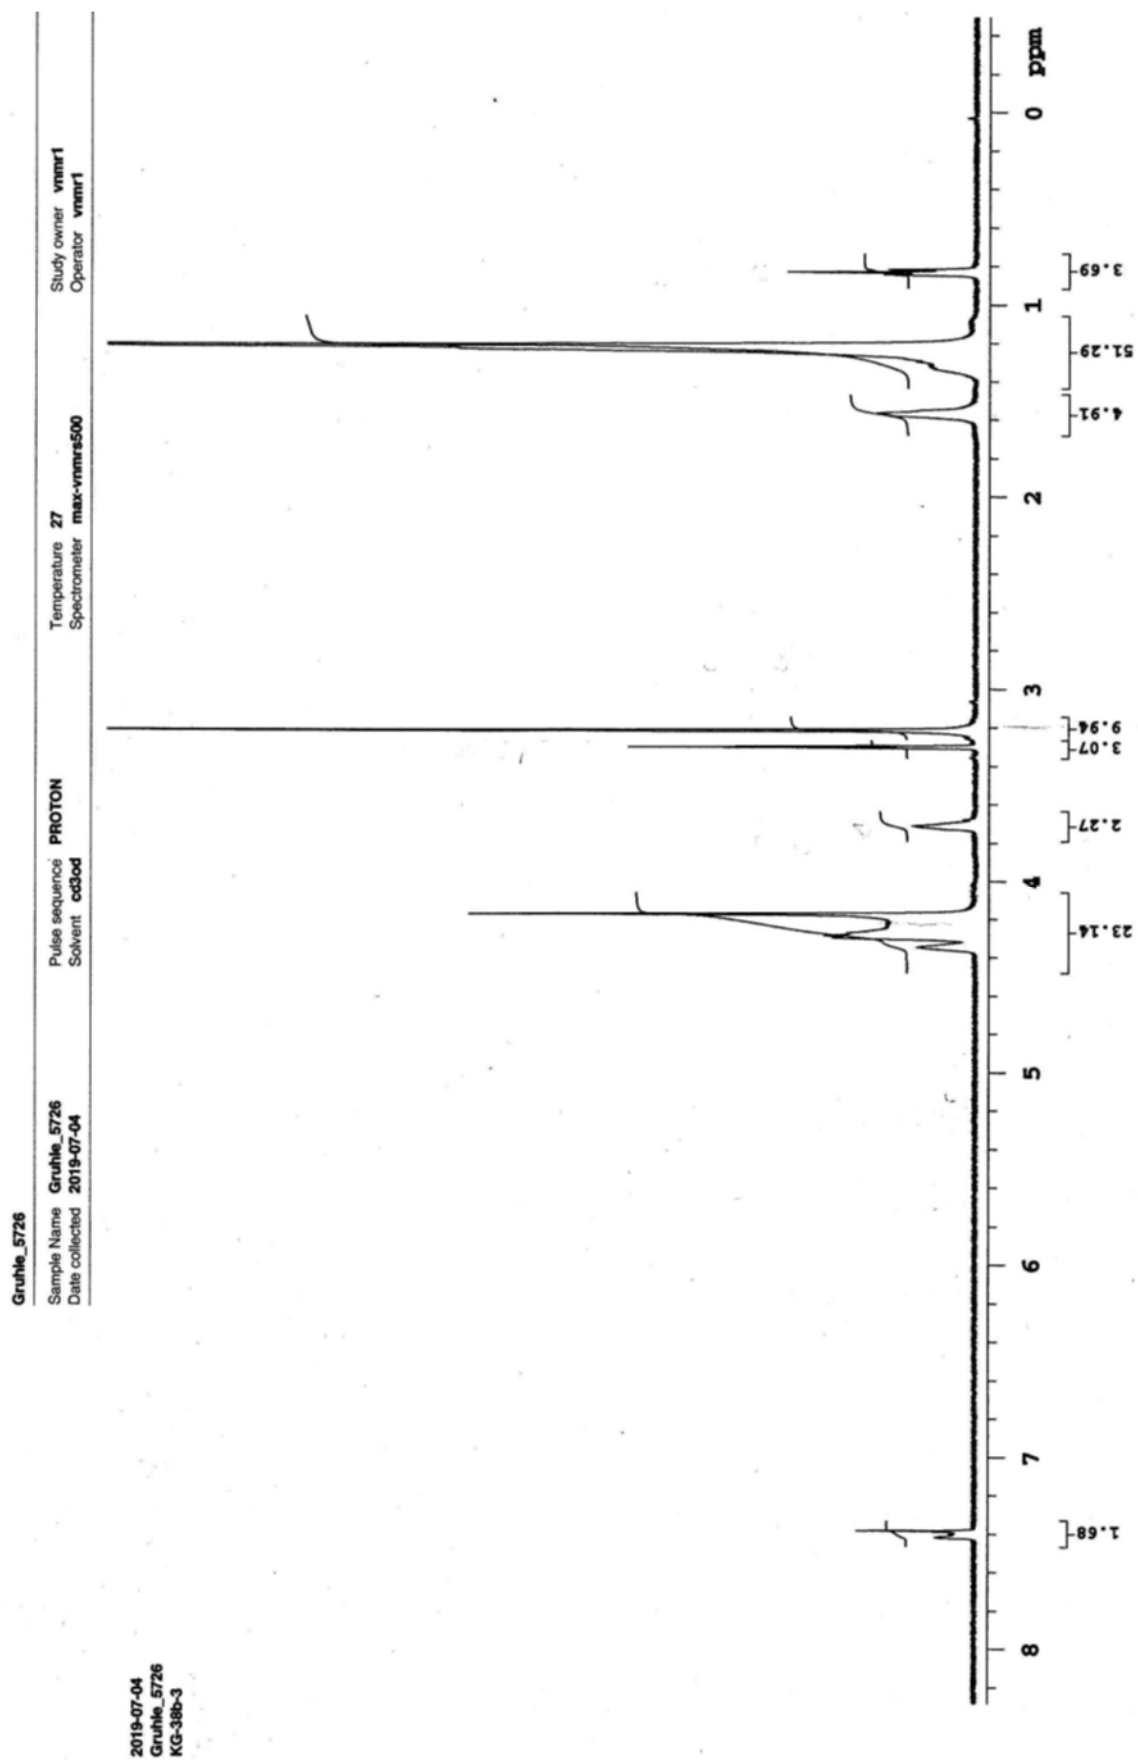

# Organic & Biomolecular Chemistry

## PC-C32(1,32C8)-PC – $^{13}\text{C}$ NMR

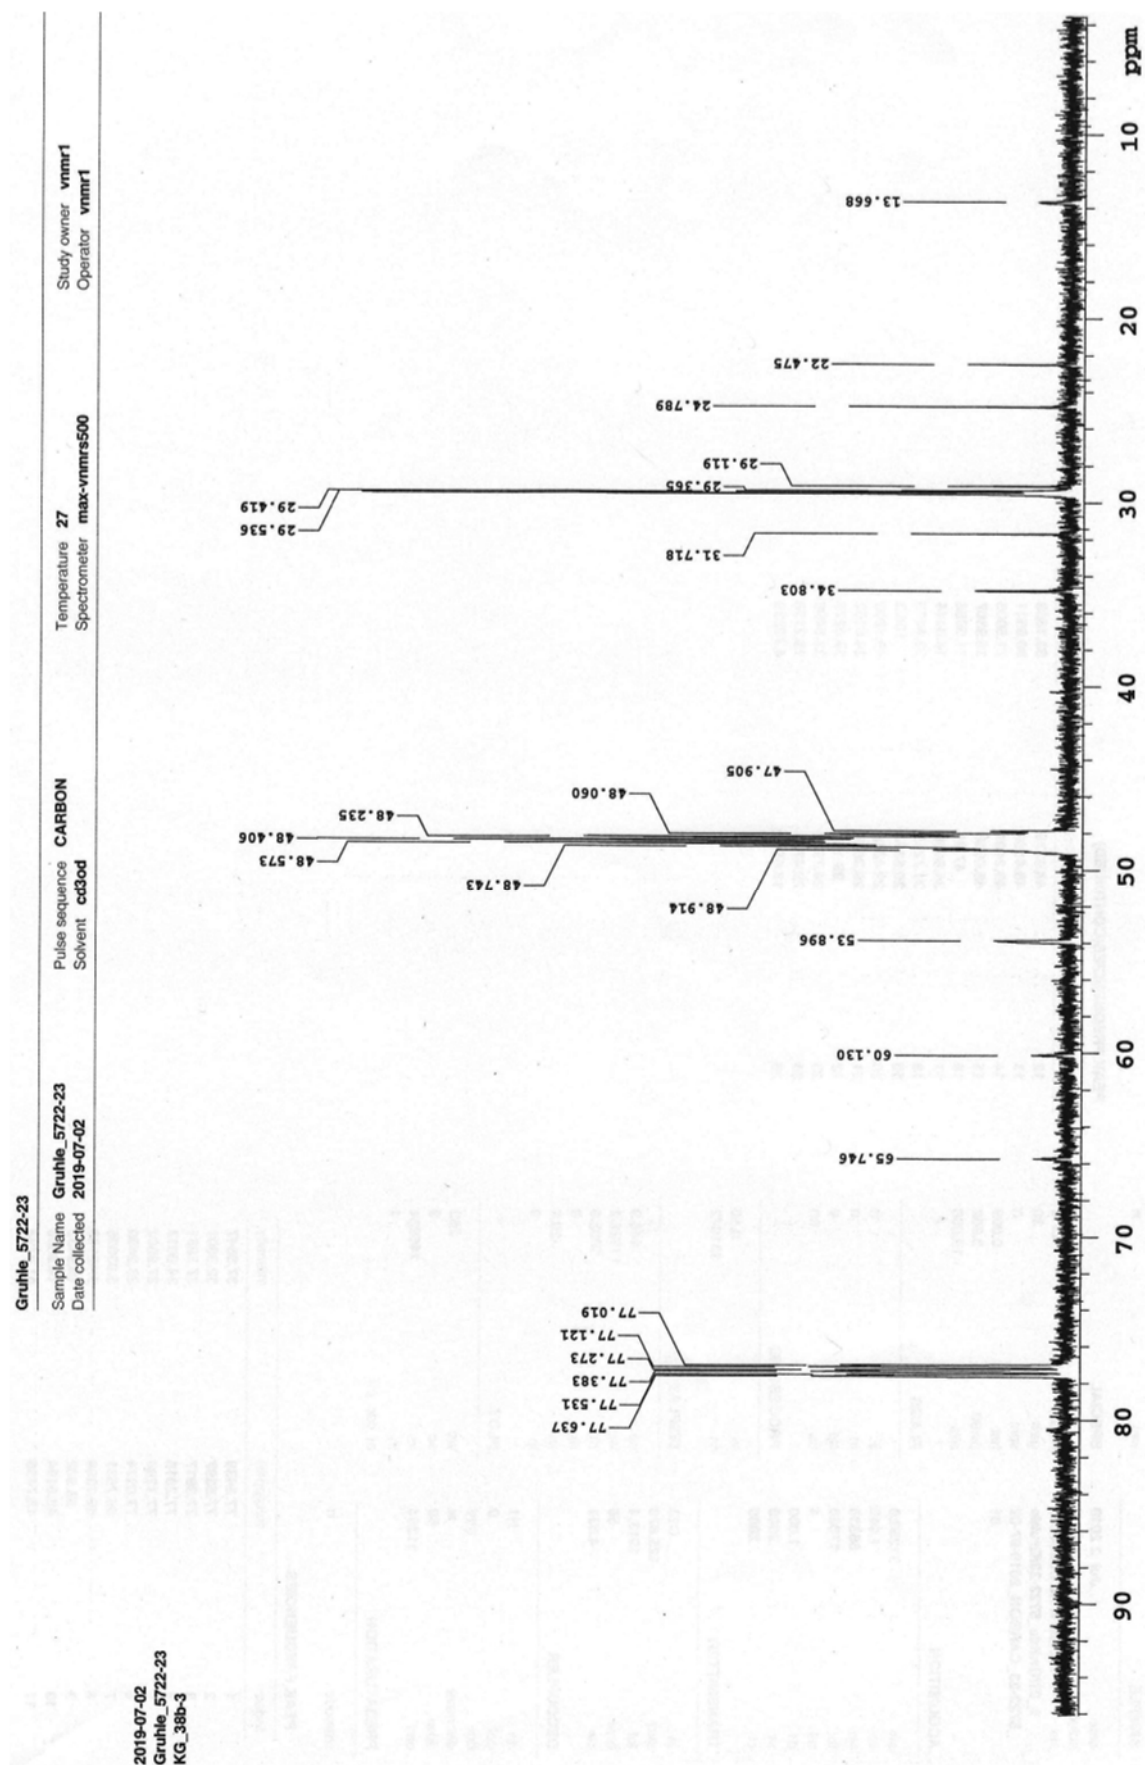

# Organic & Biomolecular Chemistry

## PC-C32(1,32C12)-PC – HRMS (positive mode)

KG-33b-3 #2-15 RT: 0.05-0.41 AV: 14 NL: 1.32E7  
F: FTMS + p NSI Full ms

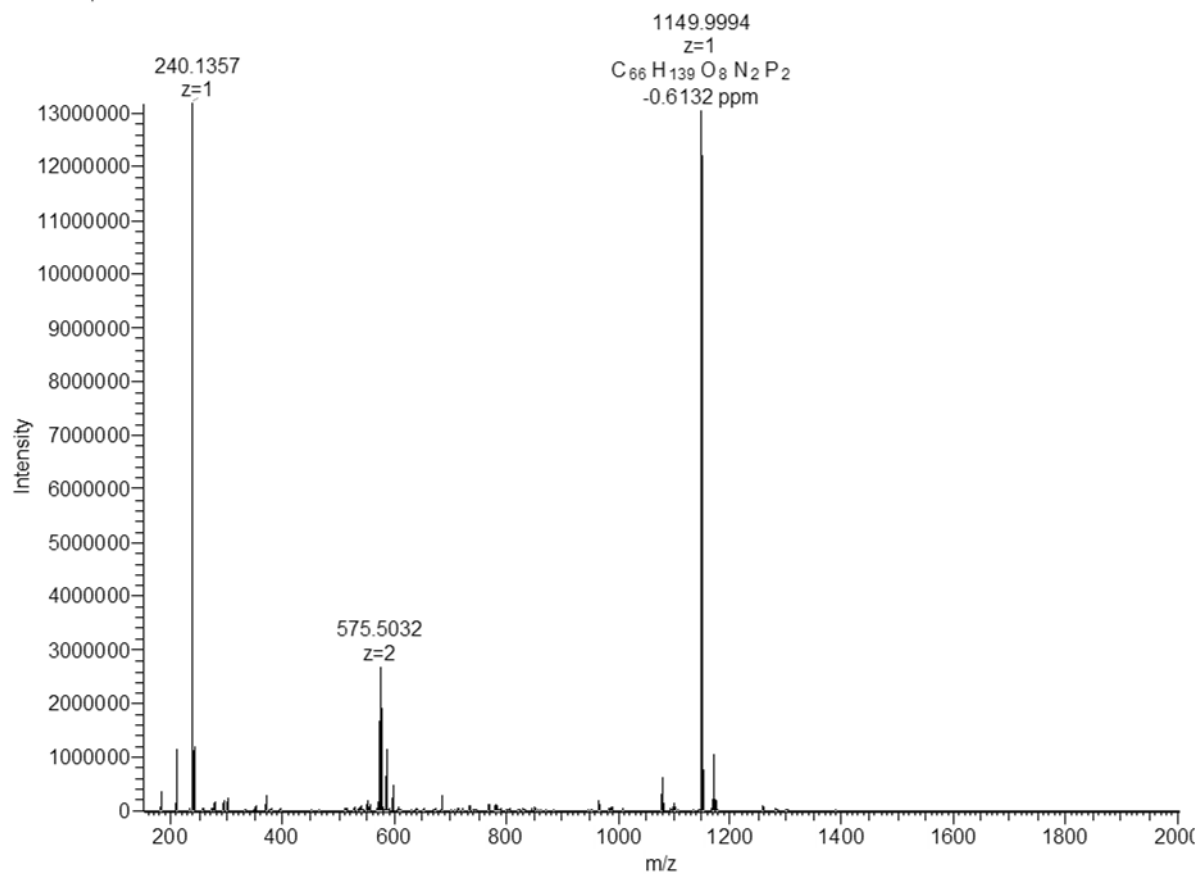



# Organic & Biomolecular Chemistry

PC-C32(1,32C12)-PC - <sup>1</sup>H NMR

Grubie\_6622-23

Sample Name Grubie\_6622-23  
Date collected 2019-10-10

Pulse sequence PROTON  
Solvent cdCl3

Temperature 27  
Spectrometer max-vnmrs500

Study owner vnmr1  
Operator vnmr1

2019-10-10  
Grubie\_6622-23  
KG-33b/3-3

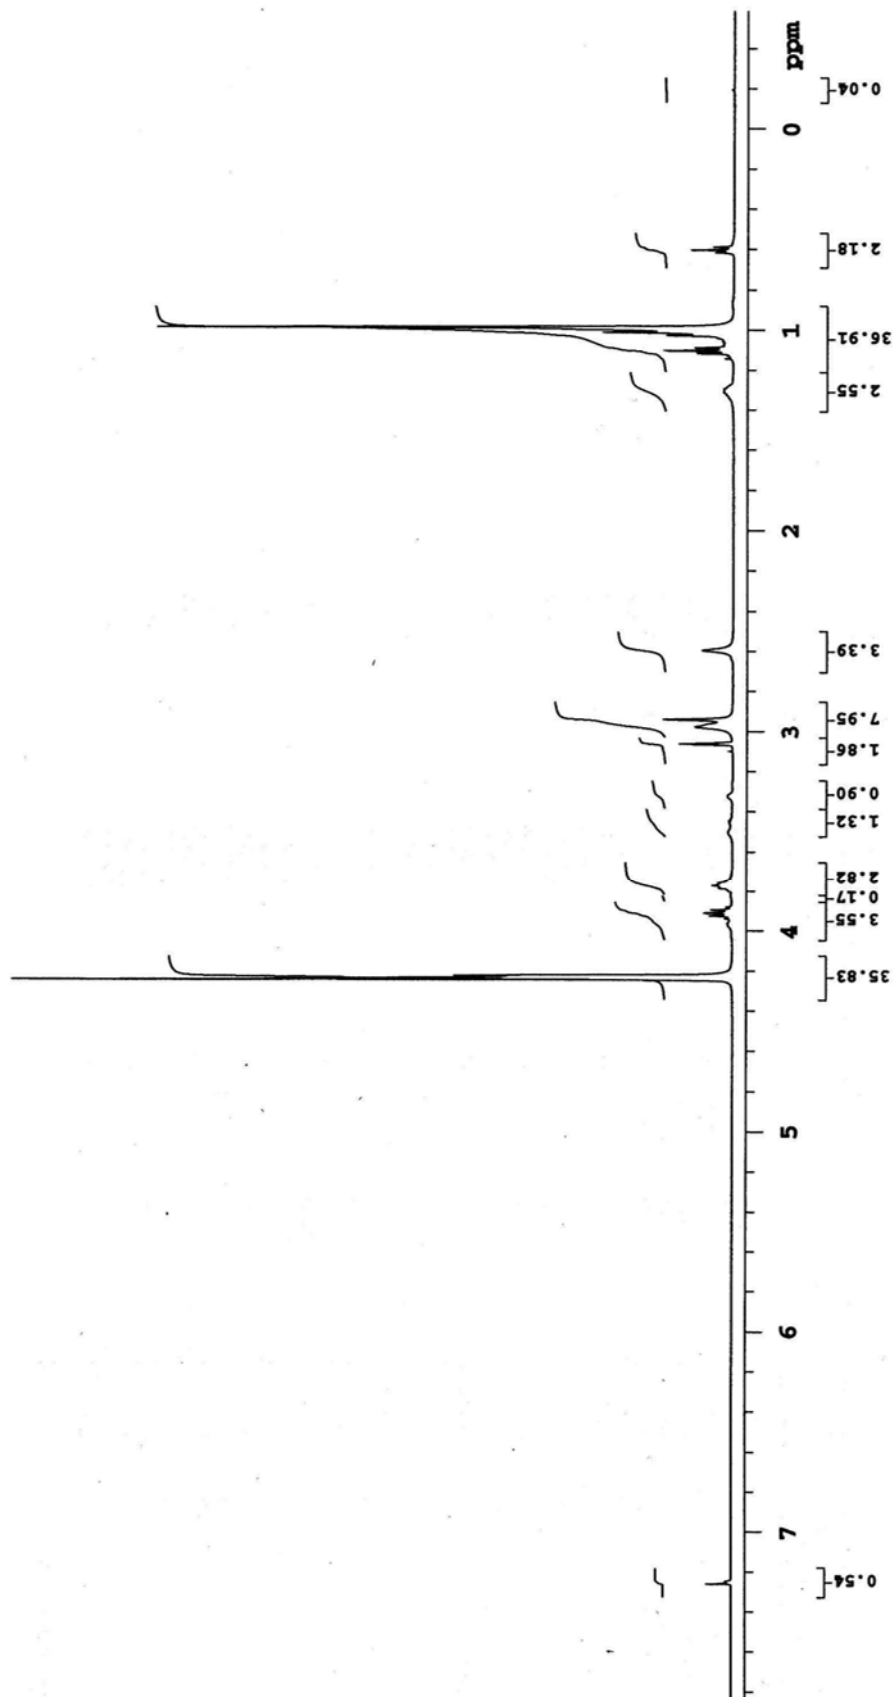

# Organic & Biomolecular Chemistry

## PC-C32(1,32C12)-PC – $^{13}\text{C}$ NMR

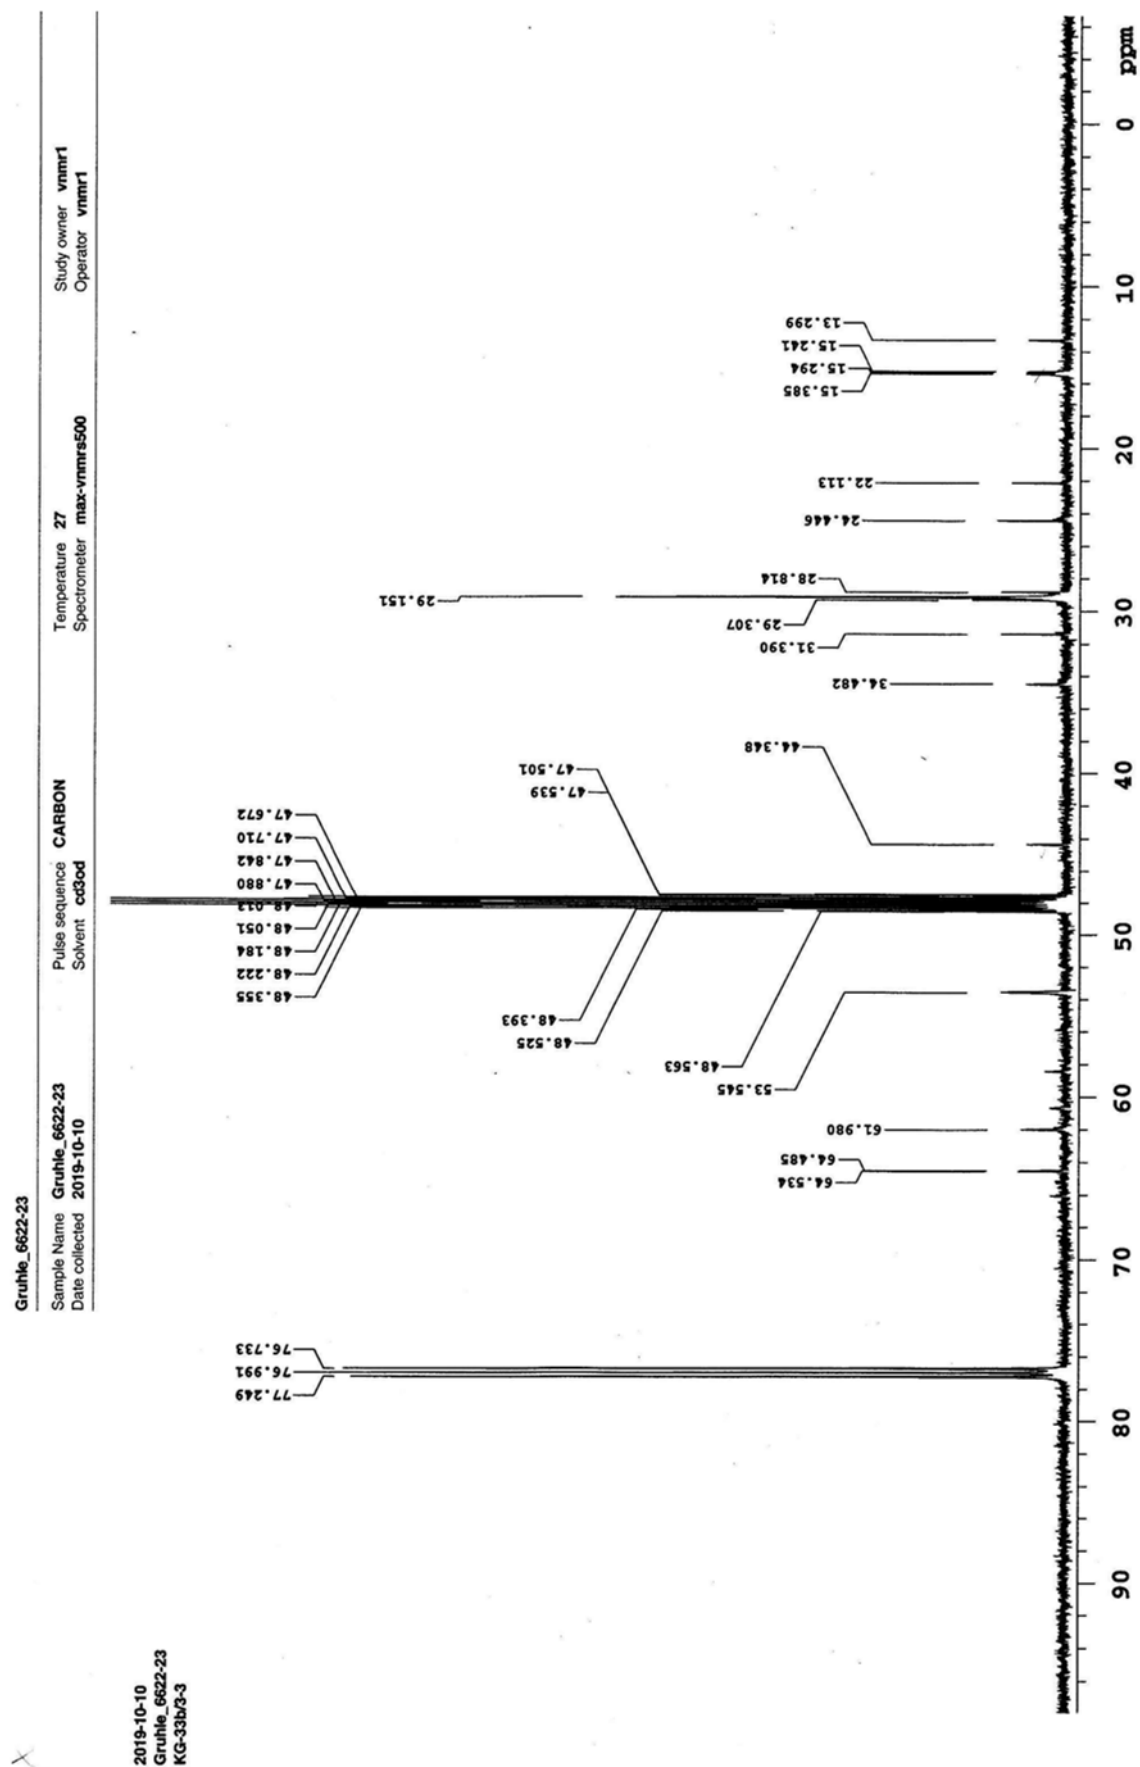

# Organic & Biomolecular Chemistry

## PC-C32(1,32C15)-PC – ESI-MS (positive mode)

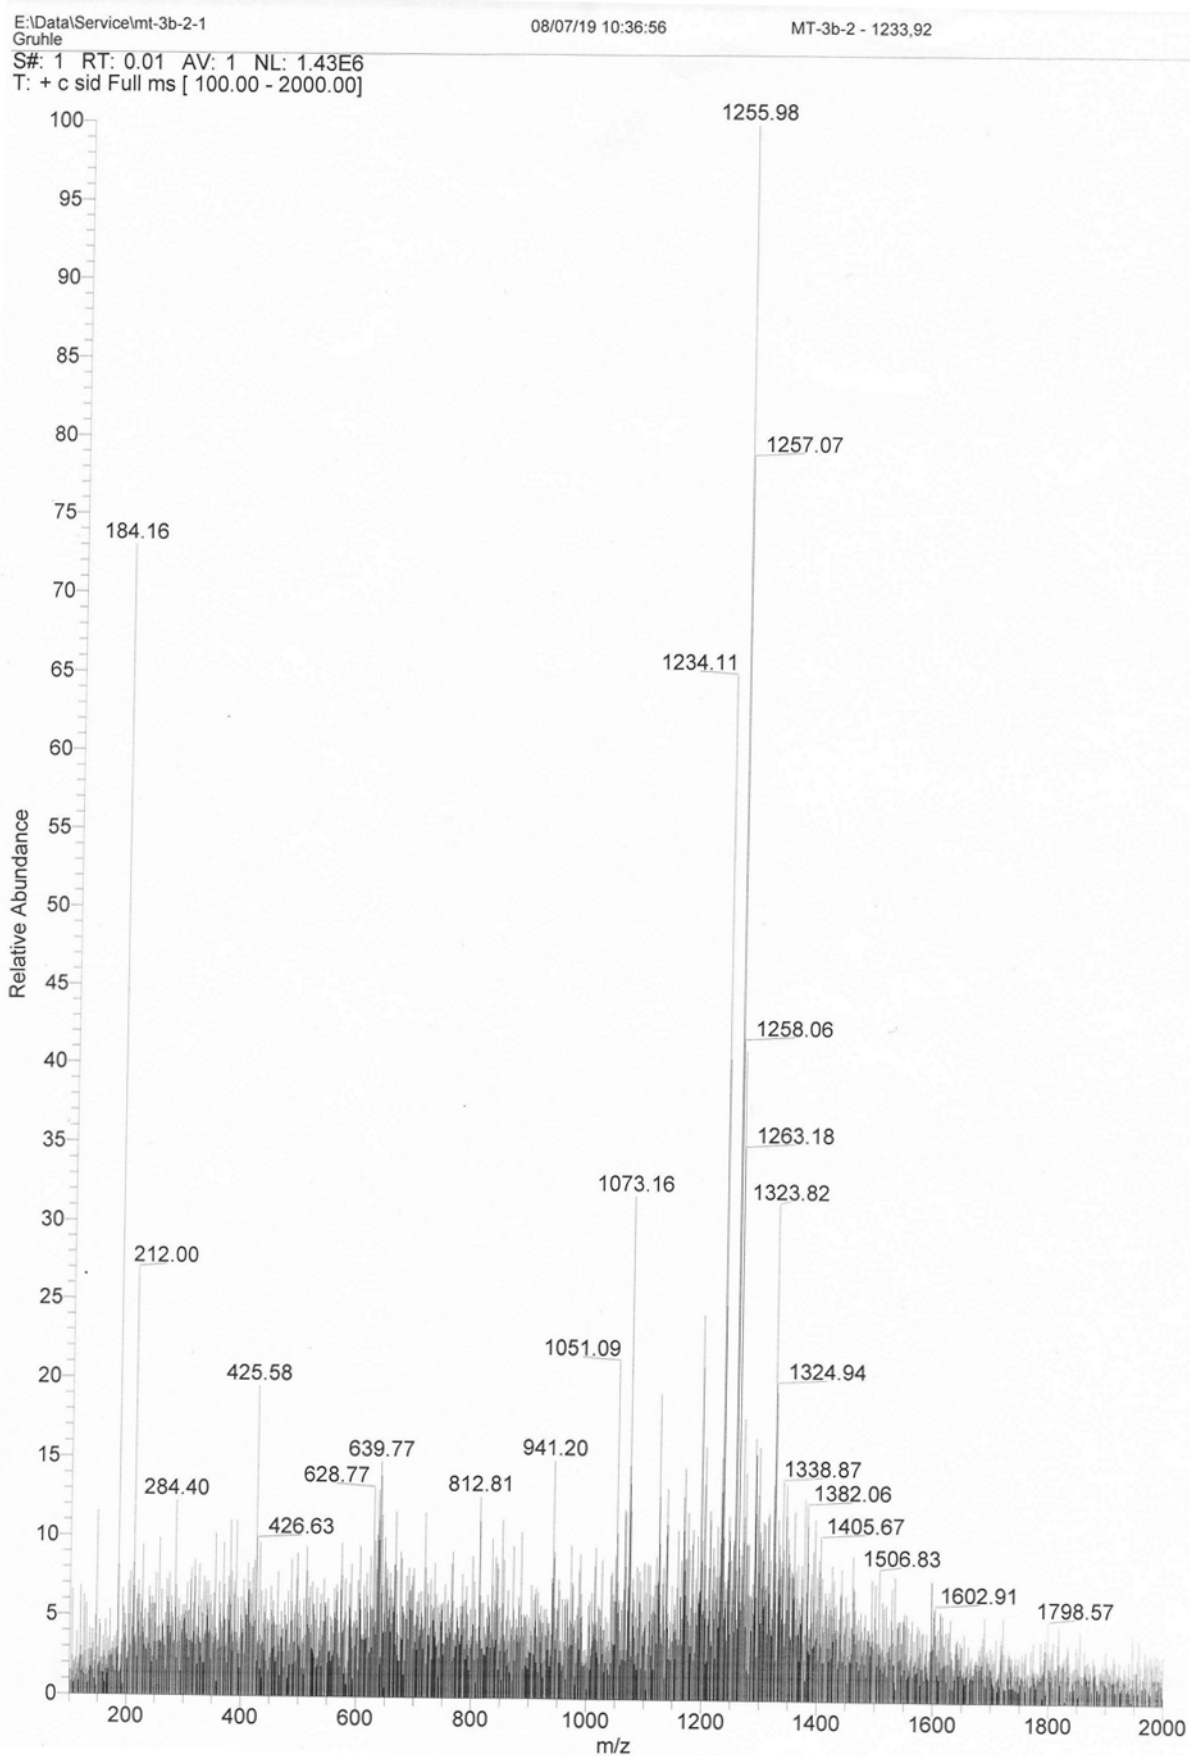

# Organic & Biomolecular Chemistry

## PC-C32(1,32C15)-PC – HRMS (positive mode)

MT-3b-2#2-15 RT: 0.04-0.40 AV: 14 NL: 4.79E6  
F: FTMS + p NSI Full ms

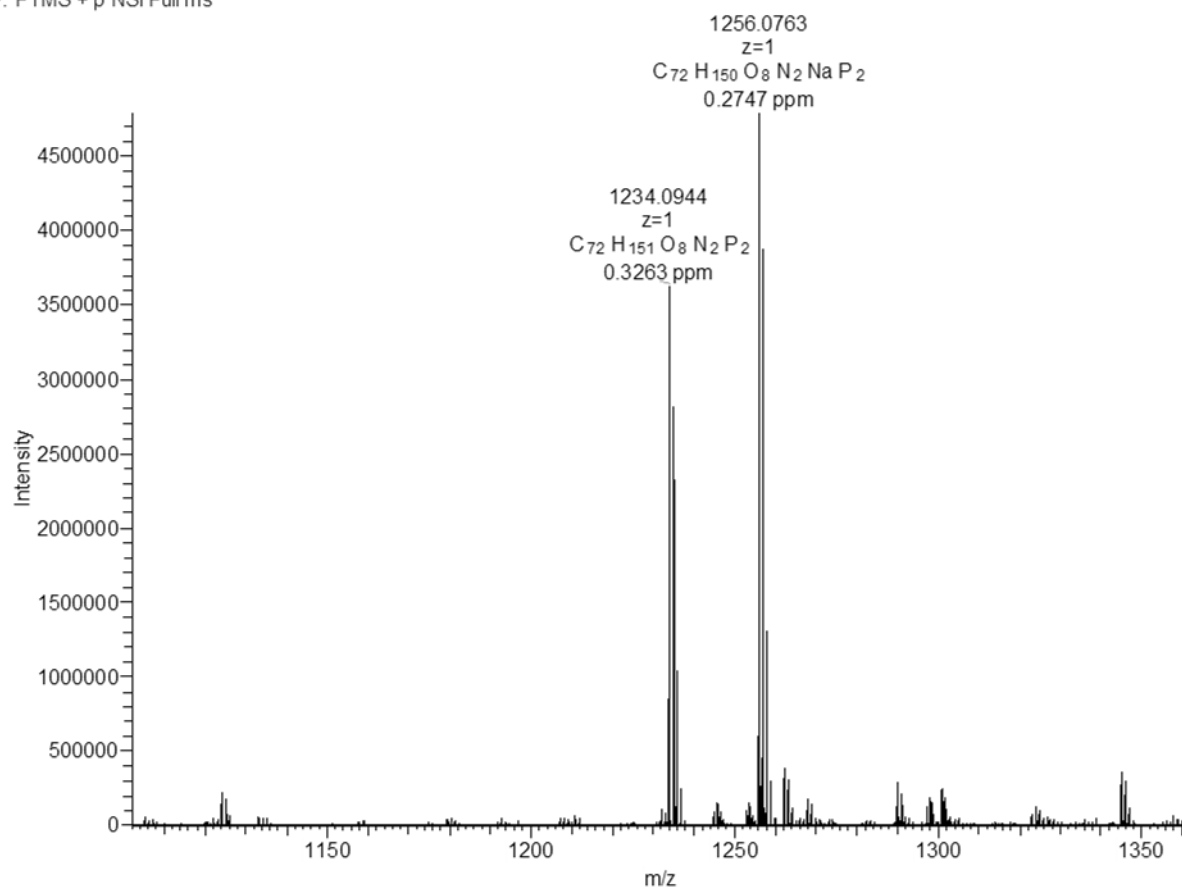

# Organic & Biomolecular Chemistry

## PC-C32(1,32C15)-PC - $^1\text{H}$ NMR

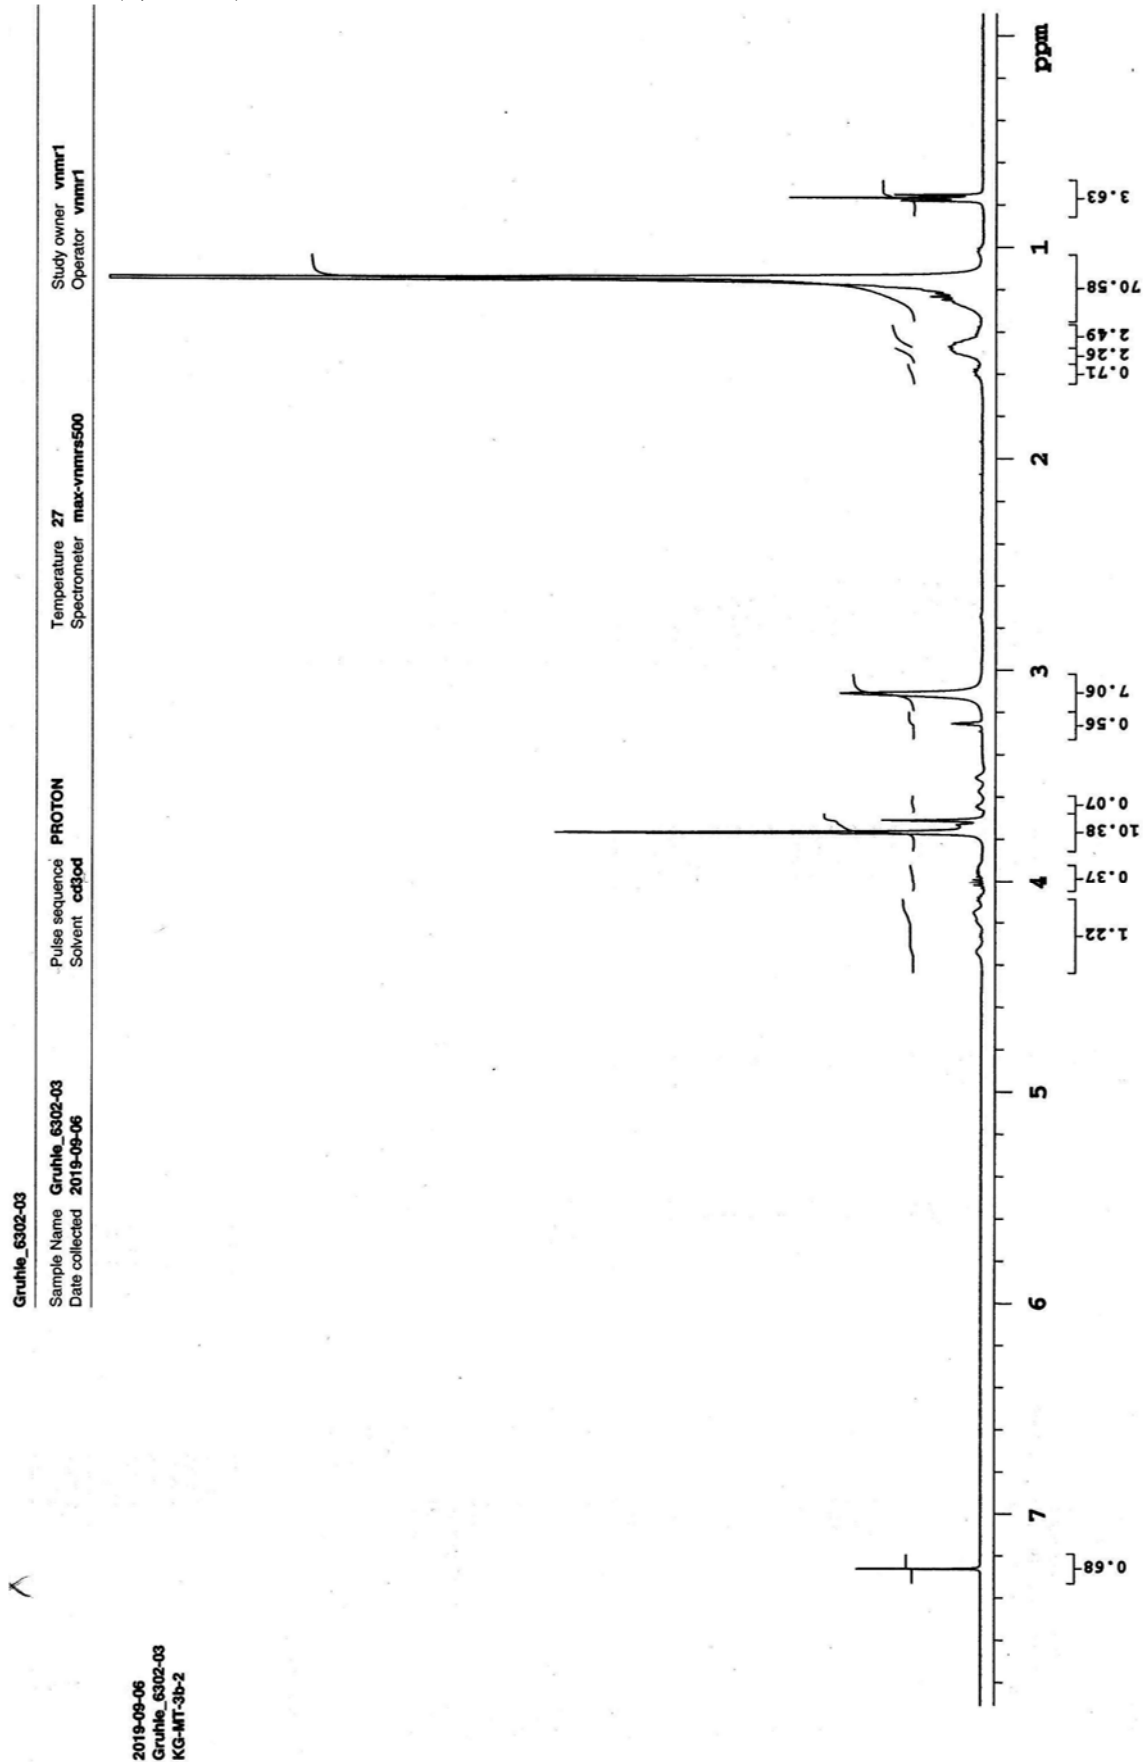

# Organic & Biomolecular Chemistry

## PC-C32(1,32C15)-PC – $^{13}\text{C}$ NMR

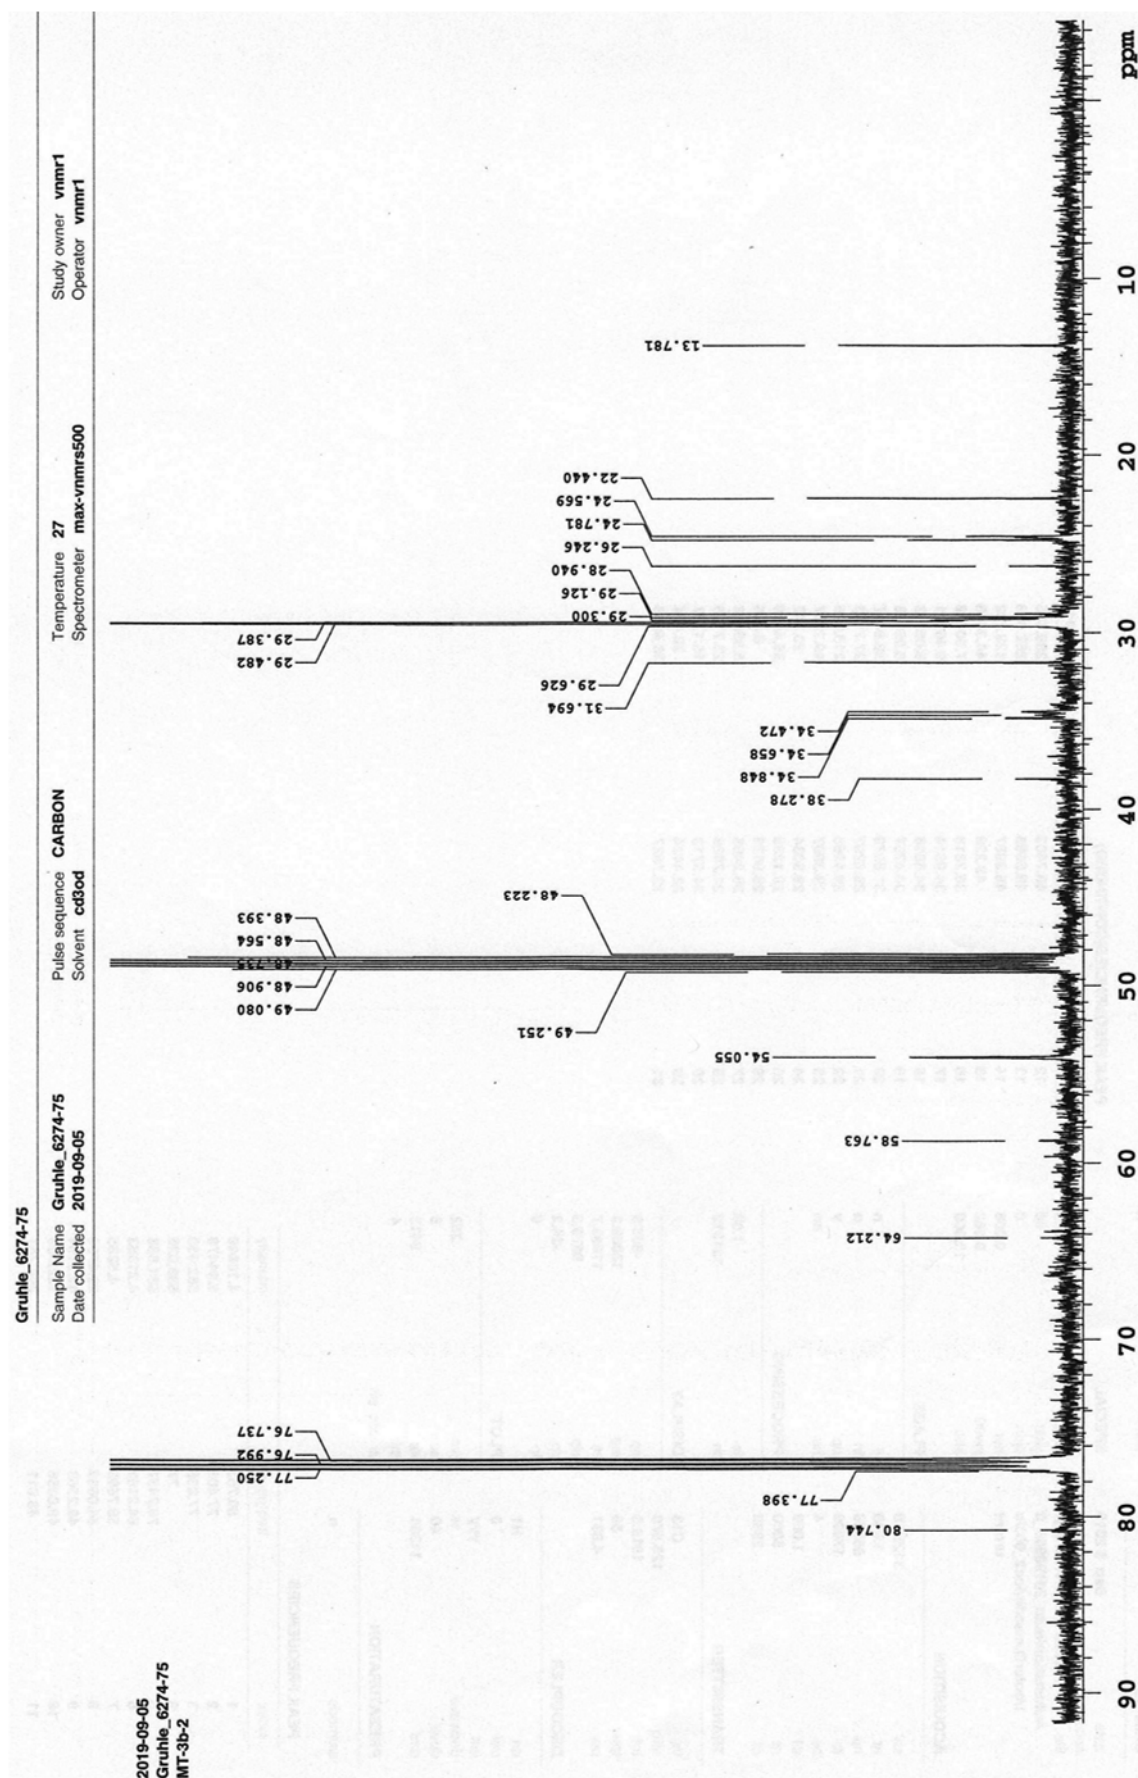

# Organic & Biomolecular Chemistry

## 6. References

1. K. Gruhle, S. Müller, A. Meister and S. Drescher, *Org. Biomol. Chem.*, 2018, **16**, 2711-2724.
2. I. A. Baser, *Fette, Seifen, Anstrichmittel*, 1972, **74**, 524-526.
